# Supplementary material for: Analysis of the Transcriptomes Downstream of Eyeless and the Hedgehog, Decapentaplegic and Notch Signaling Pathways in Drosophila melanogaster
Source: PLoS One. 2012 Aug 31;7(8):e44583. doi: 10.1371/journal.pone.0044583 (PMC3432130; doi:10.1371/journal.pone.0044583)
Supplement: Table S2 — More eye-specific genes are expressed at ≥3-fold versus the wing when Ey+signaling factors are misexpressed compared to when Ey alone is misexpressed. Genes in bold were found in clusters obtained in the DAVID analysis (see tables S3–S5). (XLS) [file pone.0044583.s007.xls]

## Sheet: common
eye-specific	ap>ey	ap>hh	ap>dpp	ap>N	ap<ey,hh	ap>ey,dpp	ap>ey,N	wing-specific	no change eye vs. wing
7B2	Ank2	Arc1	Arc1	Arc1	Ank2	Ace	Ance-5	Antp	128up
Ace	Aplip1	CG13041	CG13041	CG11852	Aplip1	Ank2	Ank2	ap	140up
Actbeta	Appl	CG13060	CG13060	CG12911	Appl	Aplip1	Appl	ara	14-3-3epsilon
Ag5r	Arc1	CG16712	CG6414	CG16712	Arc1	Appl	Arc1	bs	14-3-3zeta
Akh	ato	CG6026	Cpr100A	CG16857	CG10253	Arc1	bt	CCKLR-17D3	18w
alpha-catenin-related	CG10253		Cyp6g2	CG2254	CG11073	ato	CG10131	CG10663	26-29-p
alphaPS4	CG11382			CG42369	CG11382	boss	CG10132	CG11835	4EHP
alphaTub85E	CG13046			CG7299	CG13046	Cad88C	CG10433	CG12009	5-HT7
Ance-5	CG14234			Cpr47Eb	CG13928	CanB	CG1092	CG12063	5PtaseI
Ank2	CG14516			HLHmgamma	CG14234	Cdk5alpha	CG11073	CG13003	A16
AP-2	CG14535			Lcp65Af	CG14516	CG10253	CG11155	CG13023	a6
Aplip1	CG31790			m4	CG14535	CG11073	CG11160	CG13053	Aac11
Appl	CG34377			nimB2	CG15097	CG11382	CG1124	CG13258	Aats-ala
Arc1	CG5653			noe	CG34377	CG12071	CG11347	CG13627	Aats-ala-m
Arpc3B	CG6026			Nplp2	CG5653	CG13041	CG11670	CG13737	Aats-arg
Arr1	CG6114			pinta	CG6026	CG13046	CG11852	CG14301	Aats-asn
ato	CG6414				CG6114	CG13288	CG12911	CG14303	Aats-asp
bap	CG6495				CG6414	CG13404	CG13046	CG1441	Aats-cys
beat-IIIa	CG9021				CG7381	CG13928	CG13124	CG14915	Aats-gln
B-H2	CG9150				CG9192	CG14042	CG13315	CG1499	Aats-glupro
boss	CG9335				CG9335	CG14234	CG13335	CG15546	Aats-gly
brp	CG9572				dan	CG14321	CG1368	CG17278	Aats-his
bru-3	CG9935				danr	CG14535	CG13822	CG2663	Aats-ile
bt	Cralbp				ey	CG15097	CG13920	CG33333	Aats-leu
btd	dac				Tsp42El	CG15506	CG13937	CG4382	Aats-lys
Cad88C	dan				gl	CG15630	CG14225	CG4386	Aats-met
CanB	danr				inaC	CG1625	CG14516	CG4702	Aats-phe
Ccn	ey				lz	CG16712	CG14523	CG5162	Aats-ser
Ccp84Aa	eya				nerfin-1	CG18139	CG14629	CG7173	Aats-thr
Cdk5alpha	gl				nrm	CG31176	CG14687	CG7201	Aats-trp
CecC	inaC				qua	CG31221	CG14762	CG7512	Aats-tyr
CG10051	lz				ru	CG31291	CG15097	CG8192	Aats-val
CG10131	nerfin-1				scrt	CG31619	CG15117	CG8568	ab
CG10132	nrm				sev	CG31790	CG15201	CG9593	abd-A
CG10137	Optix				Tace	CG32458	CG15203	Cht5	Abd-B
CG10157	Osi4					CG3257	CG15209	Cpr12A	Abi
CG10175	Osi6					CG32793	CG15347	Cpr35B	abo
CG10253	qua					CG34377	CG1623	Cpr49Ah	abs
CG10332	ru					CG3556	CG16712	Cpr64Aa	ac
CG10362	scrt					CG4133	CG16857	Cpr64Ad	Ac13E
CG10433	sev					CG42404	CG17119	Cpr65Ec	Acf1
CG10479	slp1					CG4468	CG17124	Cpr78E	achi
CG10508	slp2					CG5653	CG1850	Cyp301a1	Ack
CG10702						CG6024	CG2254	Doc2	Acon
CG10764						CG6026	CG2781	Dr	Acox57D-p
CG10918						CG6114	CG30090	dys	Acph-1
CG1092						CG6329	CG30497	eg	Act42A
CG11073						CG6414	CG3074	grn	Act5C
CG11155						CG6495	CG31036	H2.0	Act79B
CG11160						CG7381	CG31150	Him	Act87E
CG11206						CG8910	CG32032	Hsp70Ab	Actn
CG1124						CG9150	CG32647	m6	Actr13E
CG11300						CG9335	CG33460	meso18E	Acyp2
CG11319						CG9363	CG34331	nord	Ada
CG11347						CG9935	CG3940	nub	Ada2b
CG11368						cpo	CG42319	Osi14	Adam
CG11382						Cralbp	CG42369	pdm2	Adar
CG11592						Cyp49a1	CG42390	Poxn	ade2
CG11670						dac	CG4250	ppk	ade3
CG11762						dan	CG4259	Sox100B	Adf1
CG11848						danr	CG4267	Sox15	Adh
CG11852						dpr12	CG4721	tey	Adhr
CG1193						dpr5	CG5080	trh	Adk2
CG12068						dpr7	CG5612	Tsp42Ei	Adk3
CG12071						ey	CG6043	TwdlBeta	adp
CG1208						eya	CG6414	twi	Ady43A
CG12290						futsch	CG7016	vg	Aef1
CG12310						gl	CG7299	vvl	aft
CG12481						gogo	CG7460	w	ago
CG12506						Gyc32E	CG9335	yellow-e2	AGO1
CG12605						HisCl1	CG9363		AGO2
CG1268						HLHmgamma	CG9505		AGO3
CG12911						inaC	CG9572		agt
CG13028						king-tubby	CG9629		Ahcy13
CG13041						klg	CG9743		Akap200
CG13043						lbm	Chit		Akt1
CG13046						Lcp65Af	Cpr100A		Alas
CG13060						Lim3	Cpr47Eb		alc
CG13124						lz	Cpr65Ay		Ald
CG13203						Mmp2	cpx		Aldh-III
CG13227						nerfin-1	Cyp12e1		Alg10
CG13285						ninaB	Cyp4g1		Alg-2
CG13288						noe	Cyp6a14		Alh
CG13335						Nplp2	dan		alien
CG13404						nrm	danr		ALiX
CG13460						nrv3	ey		AlkB
CG13646						n-syb	gl		alph
CG1368						oc	Glt		alpha4GT1
CG13822						onecut	Gs1		alpha-Adaptin
CG13830						Optix	HLHmgamma		alpha-Cat
CG13920						Osi4	Idgf2		alphaCop
CG13928						Osi6	Idgf3		alpha-Est10
CG13937						peb	jp		alpha-Est3
CG13946						phyl	l(2)efl		alpha-Man-I
CG13947						qua	lbl		alpha-Man-II
CG13966						Rbp9	Lcp65Ac		alphaPS5
CG14024						retn	Lcp65Af		alpha-Spec
CG14042						Ror	Lip4		alphaTub84B
CG14045						ru	Mf		alphaTub84D
CG14075						run	Mlc1		Als
CG14186						scrt	Mlc2		AlstR
CG14225						sev	Mp20		alt
CG14234						Side	MtnA		Amph
CG14237						skf	Neurochondrin		amx
CG14253						so	nimB2		ana1
CG14265						SP2353	noe		ana2
CG14277						SP555	Nplp2		ana3
CG14300						stops	nrm		angel
CG14312						Tace	oc		Ank
CG14321						tau	PGRP-SA		AnnIX
CG14356						Tsp42El	pncr002:3R		AnnX
CG14516						tty	pncr003:2L		Ant2
CG14523						X11Lbeta	qua		Anxb11
CG14535							Rbp9		Aos1
CG14591							regucalcin		AP-1gamma
CG14593							sev		AP-1sigma
CG14629							skf		AP-2sigma
CG14687							Spn1		AP-47
CG14762							srp		AP-50
CG14852							Thor		Apc2
CG15097							Tsp42El		APC4
CG15117							yellow-c		ApepP
CG15169									Apf
CG15201									aph-1
CG15203									aPKC
CG15209									Aprt
CG15267									Aps
CG15347									aralar1
CG1537									Arc42
CG15404									Arc-p20
CG15478									Arc-p34
CG15506									Ard1
CG15522									Arf102F
CG15550									Arf51F
CG15630									Arf72A
CG15658									Arf79F
CG15695									Arf84F
CG15704									Argk
CG15890									ari-1
CG15919									ari-2
CG1623									Ark
CG1625									arm
CG16712									armi
CG16857									Arp11
CG17047									Arp14D
CG17119									Arp5
CG17124									Arp66B
CG18139									Arp8
CG1850									Arp87C
CG18649									Arpc3A
CG18747									ARP-like
CG2254									arr
CG2269									Art1
CG2556									Art3
CG2781									Art4
CG30046									Art7
CG30088									Art8
CG30090									aru
CG30203									As
CG30296									Asator
CG30371									asf1
CG30471									ash1
CG30497									ash2
CG3074									asl
CG31036									asp
CG3105									asparagine-synthetase
CG31150									asrij
CG31176									ast
CG31221									Asx
CG31291									Atac1
CG31302									ATbp
CG31337									Ate1
CG31431									Atf-2
CG31496									Atf6
CG31619									Atg1
CG31660									Atg12
CG31676									Atg18
CG31690									Atg2
CG31698									Atg4
CG31790									Atg5
CG31900									Atg6
CG32032									Atg8a
CG32073									Atg9
CG32198									atl
CG32206									atms
CG32406									ATP7
CG32458									Atpalpha
CG3257									ATPCL
CG32645									ATPsyn-b
CG32647									ATPsyn-beta
CG32793									ATPsyn-Cf6
CG3301									ATPsyn-d
CG33460									ATPsyn-gamma
CG33465									att-ORFA
CG33988									Atu
CG34035									Atx2
CG34110									aur
CG34113									Aut1
CG34114									aux
CG34247									awd
CG34278									Axn
CG34282									Axs
CG34331									az2
CG34362									B4
CG34377									B52
CG34391									babo
CG3556									baf
CG3703									bai
CG3940									ball
CG3955									Bap
CG4133									Bap170
CG4168									Bap55
CG42313									Bap60
CG42319									barr
CG42339									bbg
CG42369									bc10
CG42390									BCL7-like
CG42404									bcn92
CG4250									BEAF-32
CG4259									beat-IIb
CG4267									bel
CG4290									Bem46
CG4341									ben
CG4408									Best1
CG4409									Best2
CG4462									beta4GalNAcTA
CG4468									beta4GalNAcTB
CG4476									beta4GalT7
CG4596									betaCop
CG4666									beta'Cop
CG4688									betaggt-I
CG4721									betaggt-II
CG4822									beta-Spec
CG4927									betaTub56D
CG4950									betaTub85D
CG5022									betaTub97EF
CG5036									BG4
CG5080									Bgb
CG5322									bgcn
CG5375									bgm
CG5612									bi
CG5653									bib
CG5888									bic
CG6024									BicD
CG6026									bif
CG6043									bigmax
CG6055									Bin1
CG6114									bin3
CG6327									bip1
CG6329									bip2
CG6414									Bj1
CG6495									Bka
CG6520									bl
CG6865									Blimp-1
CG6947									blow
CG7016									blp
CG7144									blue
CG7166									blw
CG7299									BM-40-SPARC
CG7381									Bmcp
CG7460									boca
CG7587									bocksbeutel
CG7768									boi
CG7777									bol
CG8087									bon
CG8112									bonsai
CG8213									bor
CG8216									bora
CG8271									borr
CG8401									botv
CG8910									bowl
CG8965									br
CG9021									brat
CG9040									Brd8
CG9150									Bre1
CG9192									Brf
CG9335									brk
CG9363									brm
CG9368									brn
CG9505									bru-2
CG9572									Bruce
CG9743									BRWD3
CG9813									bsf
CG9817									Bsg
CG9919									Bsg25D
CG9935									bsk
CG9989									BtbVII
Chit									BthD
chp									Btk29A
comm									btsz
cpo									btv
Cpr100A									btz
Cpr47Eb									Bub1
Cpr51A									Bub3
Cpr65Ay									BubR1
Cpr92A									bun
cpx									bur
Cralbp									bves
croc									bw
Cyp12e1									bwa
Cyp49a1									Bx42
Cyp6a14									by
Cyp6g2									bys
D									Bzd
dac									c(3)G
dan									c11.1
danr									c12.1
DAT									c12.2
Dfd									C15
dib									C3G
Dip3									ca
disco									CaBP1
disco-r									cact
dpr									cactin
dpr12									Cad74A
dpr5									Cad87A
dpr7									Cad96Ca
dpr9									Cad99C
Dpt									Caf1
Drl-2									Caf1-105
eater									Caf1-180
egr									cag
Eip93F									cal1
exex									CalpA
ey									CalpB
eya									CalpC
fd96Ca									cals
fd96Cb									Cam
fkh									CaMKI
fne									CaMKII
futsch									Camta
Ggamma30A									cana
gl									CanA-14F
GlcAT-P									CanB2
Glt									Cap
gogo									Ca-P60A
Gs1									CAP-D2
gsb									Cap-D3
gsb-n									Cap-G
Gyc32E									Cap-H2
H15									capt
He									capu
Hexo2									car
HisCl1									Cas
hiw									casp
HLHm5									Cat
HLHmgamma									cathD
Hml									Catsup
Hsp67Bc									cav
hug									caz
ia2									CBP
Idgf2									Cbp20
Idgf3									Cbp80
ImpL2									cbt
inaC									cbx
jeb									Cchl
jhamt									CCKLR-17D1
jp									CCS
Karl									Cct1
king-tubby									Cct5
klg									Cctgamma
l(2)efl									CDase
lab									cdc14
lbl									cdc16
lbm									cdc2
Lcp65Ac									cdc23
Lcp65Af									Cdc27
lcs									cdc2c
lectin-24Db									cdc2rk
Lim1									Cdc37
Lim3									Cdc42
Lip4									CDC45L
LvpH									Cdc6
LysP									Cdep
lz									CdGAPr
m4									cdi
Mdr65									Cdk4
Mec2									Cdk5
Mf									Cdk7
mid									Cdk8
Mlc1									Cdk9
Mlc2									cdm
Mmp2									CdsA
Mp20									Ced-12
mspo									ced-6
mthl2									cenB1A
MtnA									Cenp-C
nAcRbeta-21C									Cf2
nerfin-1									cg
Neurochondrin									CG10005
ng1									CG10006
ng2									CG10011
ng3									CG10038
nimB1									CG10050
nimB2									CG10053
nimB4									CG10055
ninaB									CG10063
NLaz									CG10064
nocturnin									CG10068
noe									CG10069
Nplp1									CG10075
Nplp2									CG10077
Nrg									CG10080
nrm									CG10082
nrv3									CG10083
Nrx-1									CG10089
n-syb									CG10092
NtR									CG10098
Obp44a									CG10103
Obp49a									CG10107
Obp56b									CG10133
Obp56h									CG10139
Obp99a									CG10144
obst-F									CG10147
oc									CG10153
Oli									CG10158
onecut									CG10166
Optix									CG1017
Osi4									CG10171
Osi6									CG10188
Pal									CG10189
Pbprp5									CG10191
peb									CG10194
PGRP-SA									CG10195
PH4alphaSG1									CG10200
PH4alphaSG2									CG10208
phm									CG10209
phyl									CG1021
Pig1									CG10214
Pkg21D									CG10217
ple									CG10219
pncr002:3R									CG10221
pncr003:2L									CG10222
pros									CG10225
Pxn									CG10238
qtc									CG1024
qua									CG10249
Rab3									CG10254
Rbp9									CG10260
rdgC									CG10263
regucalcin									CG10265
repo									CG10267
retinin									CG10268
retn									CG10274
Rgk1									CG10277
Rh6									CG10286
rho-5									CG10289
ro									CG10306
robo3									CG10311
Ror									CG10320
ru									CG10321
run									CG10326
Rx									CG10333
sad									CG10336
santa-maria									CG10338
Scgbeta									CG10340
scro									CG10341
scrt									CG10343
sens-2									CG10347
sev									CG10353
Sgs1									CG10366
Sgs3									CG10373
Sgs4									CG10375
Sgs5									CG10376
Sgs7									CG10383
Side									CG10395
skf									CG10399
slp1									CG10407
slp2									CG1041
so									CG10413
Sox21b									CG10414
SoxN									CG10417
Sp1									CG10418
SP2353									CG10419
SP555									CG10420
Spn1									CG10424
spok									CG10425
Sr-CI									CG10428
srp									CG10435
stet									CG10444
stj									CG10445
stops									CG10447
sv									CG10462
Tace									CG10463
tau									CG10465
Teh4									CG10466
TepI									CG10467
Thor									CG10469
tipE									CG10470
tll									CG10492
tor									CG10494
toy									CG10495
TpnC25D									CG10496
Traf4									CG10516
Tsp42El									CG10527
tty									CG10535
unc-104									CG10543
unc-4									CG10555
Vmat									CG10559
X11Lbeta									CG10561
yellow-c									CG10565
yellow-d									CG10575
yellow-f									CG10576
									CG10581
									CG10584
									CG10585
									CG10590
									CG10600
									CG10602
									CG10616
									CG10623
									CG10625
									CG10627
									CG10628
									CG10631
									CG10632
									CG10635
									CG10638
									CG10646
									CG10657
									CG10664
									CG10669
									CG10672
									CG10673
									CG10674
									CG10688
									CG10703
									CG10721
									CG10722
									CG10730
									CG10732
									CG1074
									CG10741
									CG10743
									CG10747
									CG10754
									CG10777
									CG10778
									CG10795
									CG10802
									CG10803
									CG10809
									CG10825
									CG10855
									CG10863
									CG10866
									CG10874
									CG10877
									CG10880
									CG10882
									CG10889
									CG10898
									CG10903
									CG10904
									CG10907
									CG10908
									CG1091
									CG10914
									CG10915
									CG10916
									CG10927
									CG10932
									CG10934
									CG10936
									CG10948
									CG10949
									CG10958
									CG10960
									CG10962
									CG10973
									CG10979
									CG10984
									CG10990
									CG10992
									CG11006
									CG11007
									CG11009
									CG11015
									CG1103
									CG11030
									CG11033
									CG11034
									CG11035
									CG1104
									CG11043
									CG11048
									CG1105
									CG11050
									CG11055
									CG11063
									CG11070
									CG11076
									CG11077
									CG1109
									CG11092
									CG11095
									CG11103
									CG11107
									CG11109
									CG11110
									CG11120
									CG11122
									CG11123
									CG11125
									CG11127
									CG11134
									CG11136
									CG11137
									CG11138
									CG11141
									CG11147
									CG11148
									CG1115
									CG11151
									CG1116
									CG11163
									CG11164
									CG11168
									CG11170
									CG11178
									CG11180
									CG11188
									CG11190
									CG11198
									CG1120
									CG11200
									CG11208
									CG11210
									CG11242
									CG11247
									CG11248
									CG11249
									CG11255
									CG11257
									CG11261
									CG11266
									CG11267
									CG11275
									CG11279
									CG11284
									CG1129
									CG11306
									CG11307
									CG11309
									CG11329
									CG11334
									CG11337
									CG1134
									CG11357
									CG11360
									CG11367
									CG11370
									CG11376
									CG11377
									CG11388
									CG11395
									CG11396
									CG11398
									CG11399
									CG1140
									CG11403
									CG11412
									CG11414
									CG11417
									CG11418
									CG11419
									CG1142
									CG11436
									CG11444
									CG11447
									CG11448
									CG11454
									CG11455
									CG11456
									CG11459
									CG1146
									CG11462
									CG11474
									CG11486
									CG11490
									CG11505
									CG11523
									CG11526
									CG11534
									CG11537
									CG11539
									CG11550
									CG11555
									CG11560
									CG11562
									CG11563
									CG11577
									CG11583
									CG11586
									CG11593
									CG11594
									CG11596
									CG11597
									CG11601
									CG1161
									CG11619
									CG11637
									CG11652
									CG11655
									CG11660
									CG11665
									CG11674
									CG11679
									CG11686
									CG11695
									CG11696
									CG11699
									CG11710
									CG1172
									CG11723
									CG11727
									CG11737
									CG11739
									CG11750
									CG11752
									CG11753
									CG11755
									CG11771
									CG11777
									CG11778
									CG11779
									CG11781
									CG11784
									CG11788
									CG11790
									CG11791
									CG11796
									CG11802
									CG11807
									CG11808
									CG11811
									CG11814
									CG11820
									CG11836
									CG11837
									CG11839
									CG11844
									CG11851
									CG11857
									CG11858
									CG11859
									CG11870
									CG11873
									CG11874
									CG11875
									CG11876
									CG11877
									CG11880
									CG11882
									CG11883
									CG11885
									CG11897
									CG11899
									CG11902
									CG11905
									CG11920
									CG11926
									CG11927
									CG11943
									CG11961
									CG11963
									CG11964
									CG11966
									CG11968
									CG11970
									CG11975
									CG11980
									CG11982
									CG11984
									CG11985
									CG11986
									CG11999
									CG12004
									CG12006
									CG12007
									CG12010
									CG12012
									CG12016
									CG12017
									CG12018
									CG12022
									CG12025
									CG12026
									CG12034
									CG12042
									CG12050
									CG12054
									CG12056
									CG12075
									CG12077
									CG12079
									CG12081
									CG12082
									CG12084
									CG12090
									CG12091
									CG12093
									CG12096
									CG12099
									CG12104
									CG12106
									CG12107
									CG12112
									CG12118
									CG12121
									CG12123
									CG12125
									CG12128
									CG12129
									CG12130
									CG12134
									CG12140
									CG12155
									CG12159
									CG12162
									CG12163
									CG12164
									CG12171
									CG12173
									CG12179
									CG1218
									CG12182
									CG12184
									CG12203
									CG12204
									CG12206
									CG12207
									CG12213
									CG12214
									CG12219
									CG12229
									CG12236
									CG12237
									CG12241
									CG12253
									CG12259
									CG12262
									CG12263
									CG12264
									CG12267
									CG12268
									CG1227
									CG12272
									CG12279
									CG12288
									CG12299
									CG12301
									CG12316
									CG12320
									CG12321
									CG12325
									CG1233
									CG12333
									CG12338
									CG1234
									CG12340
									CG12341
									CG12343
									CG1236
									CG12360
									CG12375
									CG12378
									CG12379
									CG12384
									CG1239
									CG12391
									CG12393
									CG1240
									CG12400
									CG12404
									CG12413
									CG12424
									CG12428
									CG12432
									CG1246
									CG12460
									CG12499
									CG12534
									CG12539
									CG12547
									CG12560
									CG12567
									CG12576
									CG12581
									CG12582
									CG12643
									CG1265
									CG12659
									CG12702
									CG12703
									CG1271
									CG12717
									CG12728
									CG12730
									CG12734
									CG12736
									CG12744
									CG12746
									CG1275
									CG12753
									CG12765
									CG12772
									CG12773
									CG12785
									CG12795
									CG12807
									CG12811
									CG12814
									CG12818
									CG12821
									CG12825
									CG12842
									CG12848
									CG12859
									CG12863
									CG12877
									CG12879
									CG12880
									CG12883
									CG12895
									CG12909
									CG1291
									CG12913
									CG12920
									CG12929
									CG12942
									CG12945
									CG12947
									CG12948
									CG12975
									CG1298
									CG12985
									CG1299
									CG12991
									CG12994
									CG13001
									CG13005
									CG13014
									CG13016
									CG13018
									CG13024
									CG13025
									CG13067
									CG1307
									CG1308
									CG13081
									CG13085
									CG13087
									CG13088
									CG13089
									CG1309
									CG13090
									CG13097
									CG13101
									CG1311
									CG13117
									CG13123
									CG13126
									CG13151
									CG1316
									CG13163
									CG1317
									CG13175
									CG13178
									CG13185
									CG13188
									CG13189
									CG1319
									CG13192
									CG13197
									CG13204
									CG13220
									CG13252
									CG13255
									CG13280
									CG13295
									CG13300
									CG13319
									CG1332
									CG13322
									CG13343
									CG13344
									CG13349
									CG13350
									CG13364
									CG13365
									CG13366
									CG13367
									CG13369
									CG13373
									CG13375
									CG13377
									CG13384
									CG13390
									CG13392
									CG13393
									CG13430
									CG13436
									CG1344
									CG1347
									CG13472
									CG13506
									CG13531
									CG1354
									CG13550
									CG13551
									CG13562
									CG13563
									CG13567
									CG13568
									CG13585
									CG13594
									CG1360
									CG13601
									CG13603
									CG13604
									CG13605
									CG13606
									CG13607
									CG13609
									CG13623
									CG13624
									CG13625
									CG13630
									CG13654
									CG13663
									CG13667
									CG13671
									CG13676
									CG13681
									CG13689
									CG13690
									CG13698
									CG13699
									CG1371
									CG13742
									CG13745
									CG13760
									CG13762
									CG13766
									CG13773
									CG13775
									CG13776
									CG13779
									CG13784
									CG13800
									CG13807
									CG13827
									CG13850
									CG13865
									CG13875
									CG13876
									CG13887
									CG13890
									CG13895
									CG13896
									CG13897
									CG13900
									CG13901
									CG13902
									CG13914
									CG13917
									CG13919
									CG13921
									CG13923
									CG13926
									CG13933
									CG13957
									CG1397
									CG1399
									CG13993
									CG13994
									CG14005
									CG14020
									CG14023
									CG14040
									CG14043
									CG14044
									CG14050
									CG14054
									CG14057
									CG14060
									CG1407
									CG14073
									CG14077
									CG14100
									CG14102
									CG14103
									CG14117
									CG14130
									CG14133
									CG14145
									CG1416
									CG14164
									CG14174
									CG1418
									CG14182
									CG14184
									CG14194
									CG14195
									CG14199
									CG14200
									CG14207
									CG14210
									CG14212
									CG14213
									CG14215
									CG14216
									CG14220
									CG14222
									CG14223
									CG14229
									CG14230
									CG14231
									CG14232
									CG14235
									CG14252
									CG14260
									CG1427
									CG14270
									CG14285
									CG14286
									CG14290
									CG14299
									CG14322
									CG14333
									CG1434
									CG14341
									CG14351
									CG14352
									CG14353
									CG14394
									CG1440
									CG14407
									CG14411
									CG14414
									CG14434
									CG14435
									CG14438
									CG14439
									CG14440
									CG14441
									CG14442
									CG14450
									CG14463
									CG14464
									CG14471
									CG14476
									CG14478
									CG14479
									CG14480
									CG14482
									CG14483
									CG14505
									CG14507
									CG14511
									CG14528
									CG14542
									CG14543
									CG14550
									CG14561
									CG14562
									CG14567
									CG1458
									CG14613
									CG14614
									CG14615
									CG14618
									CG14619
									CG14621
									CG1463
									CG14630
									CG14641
									CG14642
									CG14646
									CG14647
									CG14650
									CG14657
									CG14667
									CG14671
									CG14681
									CG14683
									CG14684
									CG14696
									CG14710
									CG14711
									CG14712
									CG14721
									CG14722
									CG14749
									CG14764
									CG14767
									CG14777
									CG14778
									CG14782
									CG14785
									CG14786
									CG14798
									CG14803
									CG14804
									CG14805
									CG14806
									CG14812
									CG14814
									CG14815
									CG14816
									CG14817
									CG14818
									CG14830
									CG14834
									CG1486
									CG14860
									CG14869
									CG14881
									CG14882
									CG14894
									CG14898
									CG14899
									CG14903
									CG14906
									CG14907
									CG14910
									CG14911
									CG1492
									CG14935
									CG14939
									CG14956
									CG14962
									CG14965
									CG14966
									CG14967
									CG14969
									CG14971
									CG14977
									CG14980
									CG14985
									CG14995
									CG14997
									CG14998
									CG15005
									CG15011
									CG15012
									CG15014
									CG15019
									CG15027
									CG15072
									CG15073
									CG15083
									CG15084
									CG15087
									CG15093
									CG15094
									CG15098
									CG15099
									CG15100
									CG15107
									CG15111
									CG15118
									CG1513
									CG15134
									CG1514
									CG15141
									CG1516
									CG15160
									CG15168
									CG15173
									CG1518
									CG15220
									CG1523
									CG15237
									CG15279
									CG15282
									CG1529
									CG15313
									CG15317
									CG1532
									CG15321
									CG15335
									CG15352
									CG15356
									CG15365
									CG15382
									CG15386
									CG15387
									CG15390
									CG1542
									CG15432
									CG15435
									CG15436
									CG15438
									CG15439
									CG15440
									CG15443
									CG15445
									CG15456
									CG15473
									CG1550
									CG15514
									CG15523
									CG15525
									CG1553
									CG15535
									CG15536
									CG15544
									CG15547
									CG15561
									CG15601
									CG15602
									CG15609
									CG15611
									CG15618
									CG15626
									CG15628
									CG15629
									CG15642
									CG15643
									CG15646
									CG15653
									CG15674
									CG15684
									CG15706
									CG15715
									CG15717
									CG15725
									CG15727
									CG15735
									CG15738
									CG15743
									CG15744
									CG15747
									CG1575
									CG15765
									CG15770
									CG15771
									CG15772
									CG1578
									CG15786
									CG15814
									CG15816
									CG15817
									CG1582
									CG15831
									CG15863
									CG15877
									CG15879
									CG15880
									CG15881
									CG15892
									CG15896
									CG15908
									CG15912
									CG15914
									CG15916
									CG15922
									CG1597
									CG1598
									CG1599
									CG1600
									CG1602
									CG1603
									CG1620
									CG1621
									CG1622
									CG1628
									CG1635
									CG1636
									CG1637
									CG1640
									CG1646
									CG1647
									CG1648
									CG1657
									CG1662
									CG1663
									CG1665
									CG1667
									CG16708
									CG1671
									CG16711
									CG16717
									CG16718
									CG16719
									CG16721
									CG1673
									CG16734
									CG16742
									CG1675
									CG16753
									CG16758
									CG1677
									CG16771
									CG16787
									CG16789
									CG16790
									CG16791
									CG16798
									CG1681
									CG16812
									CG16817
									CG16833
									CG16838
									CG16865
									CG16868
									CG1688
									CG16890
									CG16892
									CG16896
									CG16903
									CG16908
									CG16912
									CG16935
									CG16936
									CG16940
									CG16941
									CG16947
									CG16952
									CG16953
									CG16959
									CG16971
									CG16972
									CG16974
									CG16979
									CG16984
									CG16985
									CG16986
									CG16989
									CG17002
									CG17019
									CG1703
									CG17036
									CG17059
									CG17068
									CG1707
									CG17078
									CG17082
									CG17121
									CG17129
									CG17141
									CG17153
									CG17162
									CG17163
									CG17168
									CG17180
									CG17184
									CG17186
									CG17187
									CG17202
									CG17209
									CG17211
									CG17218
									CG17219
									CG17221
									CG17230
									CG17233
									CG17249
									CG17255
									CG17257
									CG17259
									CG17260
									CG17265
									CG17266
									CG17267
									CG17271
									CG17272
									CG17273
									CG17282
									CG17292
									CG17293
									CG17294
									CG17327
									CG17328
									CG17331
									CG17333
									CG17337
									CG17352
									CG17359
									CG17361
									CG1737
									CG17370
									CG1738
									CG17385
									CG17440
									CG17446
									CG17454
									CG1746
									CG17471
									CG17486
									CG1749
									CG17490
									CG17493
									CG17494
									CG17508
									CG17510
									CG17514
									CG17528
									CG1753
									CG17544
									CG17556
									CG17565
									CG17568
									CG17574
									CG17593
									CG17597
									CG17598
									CG17600
									CG17612
									CG17618
									CG1764
									CG17660
									CG17665
									CG17672
									CG17680
									CG17683
									CG17684
									CG17689
									CG17691
									CG17707
									CG17712
									CG17715
									CG17721
									CG17726
									CG17734
									CG17737
									CG17746
									CG17754
									CG17764
									CG17765
									CG17766
									CG17768
									CG17776
									CG17786
									CG17802
									CG17806
									CG17807
									CG17829
									CG17834
									CG17836
									CG17838
									CG17840
									CG17841
									CG17843
									CG1785
									CG17883
									CG1789
									CG17896
									CG17904
									CG17912
									CG1792
									CG17931
									CG17982
									CG17985
									CG17996
									CG18004
									CG18005
									CG1801
									CG18011
									CG18012
									CG18048
									CG18081
									CG18094
									CG1812
									CG1814
									CG18143
									CG1815
									CG18155
									CG18171
									CG18177
									CG18178
									CG18190
									CG18213
									CG1824
									CG18259
									CG1826
									CG18262
									CG1827
									CG18271
									CG18273
									CG18292
									CG18316
									CG18317
									CG1832
									CG18324
									CG18336
									CG18347
									CG18356
									CG1837
									CG18375
									CG1840
									CG18428
									CG18445
									CG1845
									CG1847
									CG18473
									CG18476
									CG18490
									CG18508
									CG18528
									CG18536
									CG18549
									CG18591
									CG18596
									CG18598
									CG18600
									CG18604
									CG18616
									CG18619
									CG18624
									CG18659
									CG18661
									CG1868
									CG18731
									CG18749
									CG18764
									CG18769
									CG18809
									CG18811
									CG18812
									CG18815
									CG1882
									CG1885
									CG18854
									CG18870
									CG1888
									CG1890
									CG1896
									CG1902
									CG1907
									CG1908
									CG1910
									CG1924
									CG1927
									CG1943
									CG1951
									CG1962
									CG1965
									CG1968
									CG1970
									CG1972
									CG1983
									CG1998
									CG2004
									CG2006
									CG2017
									CG2021
									CG2025
									CG2034
									CG2051
									CG2059
									CG2061
									CG2063
									CG2064
									CG2076
									CG2082
									CG2083
									CG2091
									CG2100
									CG2107
									CG2116
									CG2118
									CG2120
									CG2121
									CG2124
									CG2126
									CG2129
									CG2135
									CG2144
									CG2145
									CG2147
									CG2158
									CG2162
									CG2177
									CG2182
									CG2183
									CG2186
									CG2199
									CG2200
									CG2202
									CG2211
									CG2213
									CG2218
									CG2219
									CG2224
									CG2246
									CG2247
									CG2249
									CG2258
									CG2260
									CG2263
									CG2264
									CG2277
									CG2292
									CG2310
									CG2316
									CG2321
									CG2371
									CG2444
									CG2446
									CG2453
									CG2469
									CG2478
									CG2493
									CG2519
									CG2540
									CG2543
									CG2604
									CG2608
									CG2611
									CG2614
									CG2617
									CG2656
									CG2658
									CG2662
									CG2685
									CG2691
									CG2694
									CG2698
									CG2701
									CG2712
									CG2747
									CG2765
									CG2767
									CG2774
									CG2789
									CG2790
									CG2791
									CG2794
									CG2807
									CG2811
									CG2818
									CG2846
									CG2852
									CG2862
									CG2865
									CG2875
									CG2889
									CG2906
									CG2909
									CG2911
									CG2915
									CG2918
									CG2921
									CG2924
									CG2926
									CG2931
									CG2938
									CG2941
									CG2943
									CG2947
									CG2950
									CG2970
									CG2972
									CG2974
									CG2975
									CG2976
									CG2982
									CG2991
									CG30000
									CG30001
									CG30005
									CG30007
									CG30010
									CG30015
									CG30020
									CG30022
									CG3003
									CG30035
									CG3004
									CG30051
									CG30054
									CG30055
									CG30077
									CG3008
									CG30085
									CG30089
									CG30094
									CG30096
									CG30100
									CG30105
									CG3011
									CG30118
									CG30122
									CG30152
									CG30157
									CG30159
									CG3016
									CG30169
									CG30183
									CG30184
									CG30185
									CG30187
									CG30190
									CG30193
									CG30269
									CG30284
									CG30290
									CG30291
									CG3032
									CG3033
									CG30338
									CG30342
									CG30343
									CG30344
									CG30349
									CG3036
									CG30372
									CG30373
									CG3038
									CG30381
									CG30387
									CG30389
									CG30390
									CG30392
									CG30394
									CG3040
									CG30403
									CG30409
									CG30410
									CG30414
									CG30415
									CG30421
									CG30423
									CG30427
									CG30466
									CG30467
									CG30485
									CG30493
									CG30495
									CG30496
									CG30499
									CG30502
									CG30503
									CG3056
									CG3061
									CG3065
									CG3071
									CG3075
									CG3077
									CG3085
									CG3099
									CG31004
									CG31005
									CG31012
									CG31019
									CG31028
									CG31033
									CG31044
									CG31055
									CG31063
									CG31064
									CG31068
									CG3107
									CG31075
									CG31100
									CG31108
									CG31109
									CG31111
									CG31115
									CG31120
									CG31122
									CG31125
									CG31126
									CG31133
									CG31142
									CG31156
									CG31158
									CG31163
									CG31169
									CG31191
									CG31195
									CG31211
									CG31216
									CG31217
									CG31223
									CG31224
									CG31229
									CG31246
									CG31249
									CG31251
									CG31278
									CG31287
									CG31301
									CG31313
									CG31342
									CG31344
									CG31352
									CG31357
									CG31360
									CG31365
									CG31367
									CG31368
									CG31381
									CG31388
									CG31392
									CG31414
									CG31441
									CG31457
									CG31460
									CG31467
									CG31472
									CG31473
									CG31475
									CG3149
									CG31495
									CG31510
									CG31522
									CG31523
									CG31531
									CG31534
									CG31538
									CG31548
									CG31549
									CG31550
									CG3156
									CG3163
									CG31630
									CG31635
									CG31637
									CG31638
									CG3164
									CG31643
									CG31648
									CG3165
									CG31650
									CG31672
									CG31673
									CG31678
									CG31688
									CG31694
									CG31712
									CG31715
									CG31716
									CG31717
									CG31728
									CG31729
									CG3173
									CG31731
									CG31739
									CG31743
									CG31751
									CG31778
									CG31782
									CG31793
									CG31800
									CG31812
									CG3184
									CG31849
									CG31855
									CG31864
									CG31869
									CG31898
									CG31908
									CG31917
									CG31918
									CG3192
									CG31920
									CG31922
									CG31935
									CG31937
									CG3194
									CG31950
									CG31957
									CG31961
									CG3198
									CG31998
									CG32000
									CG32016
									CG32021
									CG32022
									CG32026
									CG32038
									CG32043
									CG32048
									CG32066
									CG32068
									CG32069
									CG32075
									CG3209
									CG32091
									CG32095
									CG32100
									CG32103
									CG32104
									CG32109
									CG32112
									CG32113
									CG32133
									CG32135
									CG32137
									CG32138
									CG3214
									CG32147
									CG32152
									CG32155
									CG32159
[truncated: 4,239 more rows]
