# Supplementary material for: Analysis of the Transcriptomes Downstream of Eyeless and the Hedgehog, Decapentaplegic and Notch Signaling Pathways in Drosophila melanogaster
Source: PLoS One. 2012 Aug 31;7(8):e44583. doi: 10.1371/journal.pone.0044583 (PMC3432130; doi:10.1371/journal.pone.0044583)
Supplement: Table S5 — Raw data for DAVID analysis of lists of genes with no change in expression in eye control vs. wing control libraries. (XLSX) [file pone.0044583.s010.xlsx]

## Sheet: No change 1
Annotation Cluster 1	Enrichment Score: 17.860736775900207
Category	Term	Count	%	PValue	Genes	List Total	Pop Hits	Pop Total	Fold Enrichment	Bonferroni	Benjamini	FDR
GOTERM_BP_FAT	GO:0034660~ncRNA metabolic process	83	2.82313	4.17254e-35	CG1434, CG5706, CG3434, AATS-GLUPRO, CG32281, AATS-ASP, CG10341, CG10092, CG31812, AATS-ASN, CG10495, CG6724, AATS-TYR, CG14712, CG3527, CG6388, AATS-LEU, CG1671, AATS-HIS, CG4610, CG6480, CG11837, AATS-PHE, CG5626, ARP5, CG12301, CG10189, CG4159, CG16912, CG6712, CG31739, CG4699, AATS-ARG, CG11447, AATS-ALA-M, CG5190, AATS-THR, AATS-GLN, AATS-ALA, CG17259, CG5728, AATS-CYS, CG1789, CG18528, AATS…	1203	133	7937	4.11734	8.8291e-32	8.8291e-32	7.22116e-32
GOTERM_BP_FAT	GO:0006399~tRNA metabolic process	62	2.10884	3.69177e-28	CG1434, CG5706, CG3434, AATS-GLUPRO, CG32281, AATS-ASP, CG31812, CG10092, AATS-ASN, CG10495, AATS-TYR, CG14712, CG6388, AATS-LEU, AATS-HIS, CG4610, AATS-PHE, CG5626, ARP5, CG10189, CG4159, CG16912, CG31739, CG4699, AATS-ARG, AATS-ALA-M, CG5190, AATS-THR, AATS-GLN, AATS-ALA, CG17259, AATS-CYS, CG18528, AATS-LYS, AATS-VAL, CG5463, CG33123, CG4045, AATS-SER, CG10802, CG14057, CG6133, CG18048, CG5414…	1203	94	7937	4.35166	7.81178e-25	3.90589e-25	6.38912e-25
GOTERM_BP_FAT	GO:0006418~tRNA aminoacylation for protein translation	36	1.22449	1.0207e-19	AATS-GLN, CG5706, AATS-ALA, CG17259, AATS-CYS, AATS-GLUPRO, AATS-LYS, AATS-ASP, AATS-VAL, CG10092, CG5463, CG33123, AATS-ASN, AATS-SER, AATS-TYR, CG14712, CG10802, AATS-LEU, CG5414, AATS-HIS, CG31133, AATS-MET, AATS-PHE, CG15100, CG16912, CG4573, CG31739, CG4699, CG33649, AATS-ARG, AATS-ILE, CG2263, AATS-ALA-M, AATS-THR, AATS-GLY, AATS-TRP	1203	47	7937	5.05354	2.15979e-16	7.19932e-17	1.76646e-16
GOTERM_BP_FAT	GO:0043039~tRNA aminoacylation	36	1.22449	1.0207e-19	AATS-GLN, CG5706, AATS-ALA, CG17259, AATS-CYS, AATS-GLUPRO, AATS-LYS, AATS-ASP, AATS-VAL, CG10092, CG5463, CG33123, AATS-ASN, AATS-SER, AATS-TYR, CG14712, CG10802, AATS-LEU, CG5414, AATS-HIS, CG31133, AATS-MET, AATS-PHE, CG15100, CG16912, CG4573, CG31739, CG4699, CG33649, AATS-ARG, AATS-ILE, CG2263, AATS-ALA-M, AATS-THR, AATS-GLY, AATS-TRP	1203	47	7937	5.05354	2.15979e-16	7.19932e-17	1.76646e-16
GOTERM_BP_FAT	GO:0043038~amino acid activation	36	1.22449	3.2113e-19	AATS-GLN, CG5706, AATS-ALA, CG17259, AATS-CYS, AATS-GLUPRO, AATS-LYS, AATS-ASP, AATS-VAL, CG10092, CG5463, CG33123, AATS-ASN, AATS-SER, AATS-TYR, CG14712, CG10802, AATS-LEU, CG5414, AATS-HIS, CG31133, AATS-MET, AATS-PHE, CG15100, CG16912, CG4573, CG31739, CG4699, CG33649, AATS-ARG, AATS-ILE, CG2263, AATS-ALA-M, AATS-THR, AATS-GLY, AATS-TRP	1203	48	7937	4.94825	6.79511e-16	1.69878e-16	5.5576e-16
GOTERM_MF_FAT	GO:0016876~ligase activity, forming aminoacyl-tRNA and related compounds	35	1.19048	7.17413e-15	AATS-GLN, CG5706, AATS-ALA, CG17259, AATS-CYS, AATS-GLUPRO, AATS-LYS, AATS-ASP, AATS-VAL, CG10092, CG33123, AATS-ASN, AATS-SER, AATS-TYR, CG14712, CG10802, AATS-LEU, CG5414, AATS-HIS, CG31133, AATS-MET, AATS-PHE, CG15100, CG16912, CG4573, CG31739, CG4699, CG33649, AATS-ARG, AATS-ILE, CG2263, AATS-ALA-M, AATS-THR, AATS-GLY, AATS-TRP	1510	48	7918	3.82354	7.67109e-12	3.83549e-12	1.14908e-11
GOTERM_MF_FAT	GO:0016875~ligase activity, forming carbon-oxygen bonds	35	1.19048	7.17413e-15	AATS-GLN, CG5706, AATS-ALA, CG17259, AATS-CYS, AATS-GLUPRO, AATS-LYS, AATS-ASP, AATS-VAL, CG10092, CG33123, AATS-ASN, AATS-SER, AATS-TYR, CG14712, CG10802, AATS-LEU, CG5414, AATS-HIS, CG31133, AATS-MET, AATS-PHE, CG15100, CG16912, CG4573, CG31739, CG4699, CG33649, AATS-ARG, AATS-ILE, CG2263, AATS-ALA-M, AATS-THR, AATS-GLY, AATS-TRP	1510	48	7918	3.82354	7.67109e-12	3.83549e-12	1.14908e-11
GOTERM_MF_FAT	GO:0004812~aminoacyl-tRNA ligase activity	35	1.19048	7.17413e-15	AATS-GLN, CG5706, AATS-ALA, CG17259, AATS-CYS, AATS-GLUPRO, AATS-LYS, AATS-ASP, AATS-VAL, CG10092, CG33123, AATS-ASN, AATS-SER, AATS-TYR, CG14712, CG10802, AATS-LEU, CG5414, AATS-HIS, CG31133, AATS-MET, AATS-PHE, CG15100, CG16912, CG4573, CG31739, CG4699, CG33649, AATS-ARG, AATS-ILE, CG2263, AATS-ALA-M, AATS-THR, AATS-GLY, AATS-TRP	1510	48	7918	3.82354	7.67109e-12	3.83549e-12	1.14908e-11
GOTERM_BP_FAT	GO:0006412~translation	68	2.31293	0.941785	CG6412, CG5706, CG17672, CG31957, CG5705, CG17737, CG4567, CG12413, CG14903, AATS-GLUPRO, AATS-ASP, CG10092, AATS-ASN, CG11334, CG17327, AATS-TYR, CG14712, AATS-LEU, CG10306, AATS-HIS, AATS-PHE, CG13126, CG16912, CG31739, CG4699, AATS-ARG, CG13163, AATS-ALA-M, AATS-THR, CG12736, CG30100, AATS-GLN, AATS-ALA, CG17259, AATS-CYS, BONSAI, CG1789, AATS-LYS, AATS-VAL, CG4447, CG5463, CG33123, CG33158, A…	1203	520	7937	0.862773	1	1	100
Annotation Cluster 2	Enrichment Score: 9.735596865639836
Category	Term	Count	%	PValue	Genes	List Total	Pop Hits	Pop Total	Fold Enrichment	Bonferroni	Benjamini	FDR
GOTERM_MF_FAT	GO:0008270~zinc ion binding	295	10.034	6.56654e-16	CG5708, CG12863, CG4169, CG31510, CG4165, CG31064, CG1832, CG10414, CG31457, CG12054, CG2202, CG10602, CG5715, CG17385, CG13123, CG15514, CG12391, ALPHA-MAN-II, ASH1, ASH2, CG4096, CG17257, CG18764, CG10321, CG17612, CG2120, CG14117, CG31534, CG2025, CG5516, CG6701, CG1317, CG5720, CG2129, BAP170, CG4877, CG4973, CG5316, CG40470, CG4291, CG17912, ABS, CG33213, CG31441, CG4080, CG30094, AEF1, CG12…	1510	1026	7918	1.50769	7.081e-13	7.081e-13	1.06581e-12
GOTERM_MF_FAT	GO:0046872~metal ion binding	418	14.2177	7.43068e-10	CG31120, CG12863, CG4169, CG31510, CG4165, CG31064, CG31063, CG12056, CG31457, CG31650, ATP7, CG4662, CG12054, CG4858, CG15514, CG12391, ALPHA-MAN-II, ASH1, ASH2, CG4096, CG14117, CG1458, CG31534, CG4589, CG1317, CG6701, CG5516, CG1319, CG12173, CG13630, CG4877, CG4973, CG4294, CG5316, CG40470, CG4291, CG33213, CG31441, CG4080, CG12795, CG31648, CG15141, ASX, CG12164, CG4887, CG1582, CG4673, CG42…	1510	1718	7918	1.27583	7.89881e-07	2.63294e-07	1.18317e-06
GOTERM_MF_FAT	GO:0043169~cation binding	423	14.3878	4.36271e-09	CG12582, CG31120, CG12863, CG4169, CG31510, CG4165, CG31064, CG31063, CG12056, CG31457, CG31650, ATP7, CG4662, CG12054, CG4858, CG15514, CG12391, ALPHA-MAN-II, ASH1, ASH2, CG4096, CG14117, CG1458, CG31534, CG4589, CG1317, CG6701, CG5516, CG1319, CG12173, CG13630, CG4877, CG4973, CG4294, CG5316, CG40470, CG4291, CG33213, CG31441, CG4080, CG12795, CG31648, CG15141, ASX, CG12164, CG4887, CG1582, CG4…	1510	1764	7918	1.25742	4.63755e-06	9.27512e-07	6.94663e-06
GOTERM_MF_FAT	GO:0043167~ion binding	424	14.4218	5.72335e-09	CG12582, CG31120, CG12863, CG4169, CG31510, CG4165, CG31064, CG31063, CG12056, CG31457, CG31650, ATP7, CG4662, CG12054, CG4858, CG15514, CG12391, ALPHA-MAN-II, ASH1, ASH2, CG4096, CG14117, CG1458, CG31534, CG4589, CG1317, CG6701, CG5516, CG1319, CG12173, CG13630, CG4877, CG4973, CG4294, CG5316, CG40470, CG4291, CG33213, CG31441, CG4080, CG12795, CG31648, CG15141, ASX, CG12164, CG4887, CG1582, CG4…	1510	1772	7918	1.2547	6.0839e-06	1.01399e-06	9.11313e-06
GOTERM_MF_FAT	GO:0046914~transition metal ion binding	334	11.3605	1.72283e-08	CG5708, CG31120, CG12863, CG17904, CG4169, CG31510, CG4165, CG31064, CG1832, CG12056, CG10414, CG31457, CG10417, ADE3, ATP7, CG12054, CG4858, CG18749, CG2202, CG10602, CG5715, CG17385, CG13123, CG13126, CG15514, CG10219, CG12391, ALPHA-MAN-II, ASH1, ASH2, CG4096, CG17257, CG18764, CG10321, CG17612, CG2120, CG1998, CG14117, CG1458, CG31534, CG2025, CG5516, CG6701, CG1317, CG5720, CG2129, CG1319, B…	1510	1354	7918	1.2935	1.83136e-05	2.61624e-06	2.74322e-05
Annotation Cluster 3	Enrichment Score: 7.413050692320113
Category	Term	Count	%	PValue	Genes	List Total	Pop Hits	Pop Total	Fold Enrichment	Bonferroni	Benjamini	FDR
GOTERM_MF_FAT	GO:0000166~nucleotide binding	306	10.4082	3.88611e-09	CG1434, CG5706, CG4266, CG17904, CG5703, CG17273, CG11198, CG32026, AATS-LEU, ADE3, ATP7, ADE2, CG5116, CG4858, CG4061, CG5524, CG5525, CG5853, BALL, ARK, CG16789, CG16912, BSK, CG1824, CG2543, CG4860, ACT87E, ARGK, AATS-ALA-M, CG5009, BETATUB56D, CG32000, AATS-ALA, CAMKI, CG17259, CG2316, CG12460, B52, CG15547, CG1316, BETATUB97EF, CG2219, AATS-VAL, CDI, CG12262, 128UP, CG33123, ACK, CG5924, CG4…	1510	1206	7918	1.33049	4.13093e-06	1.03273e-06	6.18775e-06
GOTERM_MF_FAT	GO:0017076~purine nucleotide binding	255	8.67347	2.4963e-08	CG1434, CG5706, CG17904, CG17273, CG11198, AATS-LEU, ADE3, ATP7, ADE2, CG5116, CG4858, CG4061, CG5524, CG5525, CG5853, BALL, ARK, CG16789, CG16912, BSK, CG1824, CG4860, CG2543, ACT87E, ARGK, AATS-ALA-M, CG5009, BETATUB56D, CG32000, AATS-ALA, CAMKI, CG17259, CG2316, CG15547, CG2219, BETATUB97EF, AATS-VAL, CDI, CG33123, 128UP, CG12262, ACK, CG5924, CG4789, CG1598, ABS, CG31643, CG31133, CG2017, ATP…	1510	989	7918	1.35202	2.65354e-05	3.31696e-06	3.9748e-05
GOTERM_MF_FAT	GO:0030554~adenyl nucleotide binding	216	7.34694	2.80202e-08	CG1434, CG5706, CG17904, CG11198, AATS-LEU, ATP7, ADE3, ADE2, CG4858, CG4061, CG5524, CG5853, CG5525, BALL, ARK, CG16789, CG16912, BSK, CG1824, CG4860, CG2543, ACT87E, ARGK, AATS-ALA-M, CG5009, CG32000, AATS-ALA, CAMKI, CG17259, CG2316, CG15547, AATS-VAL, CG33123, CG12262, CDI, ACK, CG5924, CG1598, ABS, CG31133, CG31643, ATPALPHA, CG5641, CG2846, CG2118, CG4573, BUR, CG17528, CCT5, BTV, AATS-ILE,…	1510	812	7918	1.39488	2.9785e-05	3.30949e-06	4.46158e-05
GOTERM_MF_FAT	GO:0001882~nucleoside binding	218	7.41497	3.83812e-08	CG1434, CG5706, CG17904, CG11198, AATS-LEU, ATP7, ADE3, ADE2, CG4858, CG4061, CG5524, CG5853, CG5525, BALL, ARK, CG16789, CG16912, BSK, CG1824, CG4860, CG2543, ACT87E, ARGK, AATS-ALA-M, CG5009, CG32000, AATS-ALA, CAMKI, CG17259, CG2316, CG15547, AATS-VAL, CDI, CG33123, CG12262, ACK, CG5924, CG1598, ABS, CG31133, CG31643, ATPALPHA, CG5641, CG2846, CG2118, CG4573, BUR, CG17528, CCT5, BTV, AATS-ILE,…	1510	824	7918	1.38729	4.07984e-05	4.07992e-06	6.11134e-05
GOTERM_MF_FAT	GO:0005524~ATP binding	201	6.83673	4.1025e-08	CG5706, CG17904, CG11198, AATS-LEU, ATP7, ADE3, ADE2, CG4858, CG4061, CG5524, CG5853, CG5525, BALL, ARK, CG16789, CG16912, BSK, CG1824, CG2543, ACT87E, ARGK, AATS-ALA-M, CG32000, AATS-ALA, CAMKI, CG17259, CG2316, CG15547, AATS-VAL, CG33123, CDI, ACK, CG5924, CG1598, ABS, CG31133, CG31643, ATPALPHA, CG5641, CG2846, CG2118, CG4573, BUR, CG17528, CCT5, BTV, AATS-ILE, CG5931, CDC2C, CG1582, CG1703, A…	1510	748	7918	1.40907	4.36086e-05	3.9645e-06	6.53229e-05
GOTERM_MF_FAT	GO:0001883~purine nucleoside binding	216	7.34694	4.76321e-08	CG1434, CG5706, CG17904, CG11198, AATS-LEU, ATP7, ADE3, ADE2, CG4858, CG4061, CG5524, CG5853, CG5525, BALL, ARK, CG16789, CG16912, BSK, CG1824, CG4860, CG2543, ACT87E, ARGK, AATS-ALA-M, CG5009, CG32000, AATS-ALA, CAMKI, CG17259, CG2316, CG15547, AATS-VAL, CG33123, CG12262, CDI, ACK, CG5924, CG1598, ABS, CG31133, CG31643, ATPALPHA, CG5641, CG2846, CG2118, CG4573, BUR, CG17528, CCT5, BTV, AATS-ILE,…	1510	817	7918	1.38634	5.06316e-05	4.2194e-06	7.58432e-05
GOTERM_MF_FAT	GO:0032559~adenyl ribonucleotide binding	201	6.83673	5.25869e-08	CG5706, CG17904, CG11198, AATS-LEU, ATP7, ADE3, ADE2, CG4858, CG4061, CG5524, CG5853, CG5525, BALL, ARK, CG16789, CG16912, BSK, CG1824, CG2543, ACT87E, ARGK, AATS-ALA-M, CG32000, AATS-ALA, CAMKI, CG17259, CG2316, CG15547, AATS-VAL, CG33123, CDI, ACK, CG5924, CG1598, ABS, CG31133, CG31643, ATPALPHA, CG5641, CG2846, CG2118, CG4573, BUR, CG17528, CCT5, BTV, AATS-ILE, CG5931, CDC2C, CG1582, CG1703, A…	1510	750	7918	1.40531	5.58983e-05	4.29998e-06	8.37326e-05
GOTERM_MF_FAT	GO:0032555~purine ribonucleotide binding	237	8.06122	1.33708e-07	CG5706, CG17904, CG17273, CG11198, AATS-LEU, ATP7, ADE3, ADE2, CG5116, CG4858, CG4061, CG5524, CG5853, CG5525, BALL, ARK, CG16789, CG16912, BSK, CG1824, CG2543, ACT87E, ARGK, AATS-ALA-M, BETATUB56D, CG32000, AATS-ALA, CAMKI, CG17259, CG2316, CG15547, CG2219, BETATUB97EF, AATS-VAL, CDI, CG33123, 128UP, ACK, CG5924, CG4789, CG1598, ABS, CG31643, CG31133, CG2017, ATPALPHA, CG5641, CG2846, ATL, CG211…	1510	923	7918	1.34643	0.000142122	1.01522e-05	0.000212899
GOTERM_MF_FAT	GO:0032553~ribonucleotide binding	237	8.06122	1.33708e-07	CG5706, CG17904, CG17273, CG11198, AATS-LEU, ATP7, ADE3, ADE2, CG5116, CG4858, CG4061, CG5524, CG5853, CG5525, BALL, ARK, CG16789, CG16912, BSK, CG1824, CG2543, ACT87E, ARGK, AATS-ALA-M, BETATUB56D, CG32000, AATS-ALA, CAMKI, CG17259, CG2316, CG15547, CG2219, BETATUB97EF, AATS-VAL, CDI, CG33123, 128UP, ACK, CG5924, CG4789, CG1598, ABS, CG31643, CG31133, CG2017, ATPALPHA, CG5641, CG2846, ATL, CG211…	1510	923	7918	1.34643	0.000142122	1.01522e-05	0.000212899
Annotation Cluster 4	Enrichment Score: 7.230892526238794
Category	Term	Count	%	PValue	Genes	List Total	Pop Hits	Pop Total	Fold Enrichment	Bonferroni	Benjamini	FDR
GOTERM_BP_FAT	GO:0034470~ncRNA processing	48	1.63265	5.44376e-16	CG1434, CG3434, CG5728, CG1789, CG18528, CG32281, CG10341, CG3071, CG31812, CG10495, CG6724, CG4045, CG3527, CG6388, CG1671, CG14057, CG6133, CBP20, CG18048, CG4610, CG15916, CG6480, AATS-PHE, CG11837, CG33260, CG5033, CG34140, CG13097, CG5626, CBP80, ARP5, CG12301, CG10189, CG4159, CG3709, CG13090, CG6712, CG33932, CG4038, CG1542, CG10463, CG31381, CG33057, CG11447, CG33505, CG4364, CG5190, CG52…	1203	92	7937	3.44226	1.17462e-12	1.95732e-13	9.65894e-13
GOTERM_BP_FAT	GO:0016072~rRNA metabolic process	21	0.714286	3.81917e-07	CG15916, CG6480, CG11837, CG5033, CG5728, CG13097, CG12301, CG1789, CG10341, CG3071, CG6712, CG4038, CG6724, CG1542, CG3527, CG11447, CG33505, CG1671, CG4364, BRAT, CG5220	1203	41	7937	3.3793	0.00080781	0.000101012	0.000660958
GOTERM_BP_FAT	GO:0006364~rRNA processing	20	0.680272	1.25657e-06	CG15916, CG6480, CG11837, CG5033, CG5728, CG13097, CG12301, CG1789, CG10341, CG3071, CG6712, CG4038, CG6724, CG1542, CG3527, CG11447, CG33505, CG1671, CG4364, CG5220	1203	40	7937	3.29884	0.00265538	0.000265856	0.00217465
GOTERM_BP_FAT	GO:0042254~ribosome biogenesis	24	0.816327	3.19535e-05	CG15916, CG32409, CG6480, CG10628, CG11837, BYS, CG5033, CG5728, CG13097, CG12301, CG1789, CG10341, CG3071, CG6712, CG4038, CG6724, CG1542, CG3527, CG11447, CG33505, CG1671, CG11583, CG4364, CG5220	1203	64	7937	2.47413	0.0653796	0.00281332	0.0552856
GOTERM_BP_FAT	GO:0022613~ribonucleoprotein complex biogenesis	30	1.02041	8.39388e-05	CG5728, CG1789, B52, CG10341, CG3071, CG18591, CG6724, CG10419, CG3527, CG13472, AGO1, AGO2, CG1671, CG15916, CG32409, CG6480, CG11837, CG10628, BYS, CG5033, CG13097, CG12301, CG6712, CG4038, CG1542, CG11447, CG33505, CG11583, CG4364, CG5220	1203	94	7937	2.10564	0.162741	0.00632356	0.145168
Annotation Cluster 5	Enrichment Score: 6.404058740342553
Category	Term	Count	%	PValue	Genes	List Total	Pop Hits	Pop Total	Fold Enrichment	Bonferroni	Benjamini	FDR
GOTERM_BP_FAT	GO:0006396~RNA processing	105	3.57143	2.46952e-16	CG1434, CG4266, CG42259, BX42, CG6015, CG10495, CG13900, CG10418, CG10419, CG3527, CG11337, CG4061, CG11837, AATS-PHE, CG5626, ARP5, CG10189, CG12301, CG4159, CG11266, C12.1, CG11447, CG17454, CG5190, CG4119, CG14216, CG4901, CG5728, CG12460, CG2021, CG1789, B52, CG1646, CG18591, CG18596, CG15440, CG6322, CG3542, CG6133, CG18048, CG4291, CG17266, CG34140, CG33932, CG5931, CG10463, CG14100, CG1033…	1203	312	7937	2.22037	4.69846e-13	9.39249e-14	3.88578e-13
GOTERM_BP_FAT	GO:0008380~RNA splicing	47	1.59864	6.15231e-07	CG32533, CG11107, CG6227, CG4901, CG4266, CG10754, CG5205, CG42259, CG2021, CG12460, B52, BX42, CG3436, CG1646, CG31812, CG3605, CG6015, CG18591, CG12343, CG10418, CG15440, CG13900, CG10419, CG11674, CG13472, CG11985, CG6322, CG3542, CBP20, CG4291, CG17266, CG33260, CG5626, CBP80, CG16941, CG3225, CG11266, C12.1, CG4849, CG5931, CG33057, CG6610, CG17454, CG17764, CG10333, CG2807, CG3198	1203	148	7937	2.09521	0.00130098	0.000144637	0.00106474
GOTERM_BP_FAT	GO:0000377~RNA splicing, via transesterification reactions with bulged adenosine as nucleophile	40	1.36054	4.89145e-06	CG32533, CG11107, CG4901, CG6227, CG4266, CG10754, CG5205, CG42259, CG2021, B52, CG3436, CG1646, BX42, CG3605, CG6015, CG18591, CG12343, CG13900, CG15440, CG10418, CG10419, CG11674, CG13472, CG11985, CG6322, CBP20, CG3542, CG4291, CG17266, CBP80, CG16941, CG3225, C12.1, CG4849, CG6610, CG17454, CG17764, CG10333, CG2807, CG3198	1203	126	7937	2.0945	0.0102969	0.000739036	0.00846499
GOTERM_BP_FAT	GO:0000398~nuclear mRNA splicing, via spliceosome	40	1.36054	4.89145e-06	CG32533, CG11107, CG4901, CG6227, CG4266, CG10754, CG5205, CG42259, CG2021, B52, CG3436, CG1646, BX42, CG3605, CG6015, CG18591, CG12343, CG13900, CG15440, CG10418, CG10419, CG11674, CG13472, CG11985, CG6322, CBP20, CG3542, CG4291, CG17266, CBP80, CG16941, CG3225, C12.1, CG4849, CG6610, CG17454, CG17764, CG10333, CG2807, CG3198	1203	126	7937	2.0945	0.0102969	0.000739036	0.00846499
GOTERM_BP_FAT	GO:0000375~RNA splicing, via transesterification reactions	40	1.36054	6.04898e-06	CG32533, CG11107, CG4901, CG6227, CG4266, CG10754, CG5205, CG42259, CG2021, B52, CG3436, CG1646, BX42, CG3605, CG6015, CG18591, CG12343, CG13900, CG15440, CG10418, CG10419, CG11674, CG13472, CG11985, CG6322, CBP20, CG3542, CG4291, CG17266, CBP80, CG16941, CG3225, C12.1, CG4849, CG6610, CG17454, CG17764, CG10333, CG2807, CG3198	1203	127	7937	2.07801	0.0127181	0.00079966	0.0104681
GOTERM_BP_FAT	GO:0016071~mRNA metabolic process	54	1.83673	0.000245512	CG10754, CG4266, CG1972, CG42259, BX42, CG3436, CG6015, CG12343, CG10418, CG13900, CG10419, CG11674, CG11337, CG11985, CG6729, CBP20, CG16941, CG3225, CG11266, C12.1, CG17454, CG6610, CG3198, CG32533, CG5222, CG11107, CG4119, CG4901, CG14216, CG6227, CG5205, CG3689, CG2021, B52, CG1646, CG3605, CG18591, CG15440, CG13472, AGO1, CG6322, CG3542, CG4291, CG17266, CG3857, CG2091, CBP80, CG4849, ARMI, …	1203	219	7937	1.62682	0.405222	0.0132339	0.424043
GOTERM_BP_FAT	GO:0006397~mRNA processing	49	1.66667	0.000274985	CG4266, CG10754, CG42259, CG1972, BX42, CG3436, CG6015, CG12343, CG13900, CG10418, CG10419, CG11674, CG11985, CBP20, CG3225, CG16941, CG11266, C12.1, CG17454, CG6610, CG3198, CG32533, CG11107, CG4119, CG5222, CG4901, CG14216, CG6227, CG5205, CG3689, CG2021, B52, CG1646, CG18591, CG3605, CG15440, CG13472, AGO1, CG6322, CG3542, CG4291, CG17266, CBP80, CG4849, CG5931, CG17764, CG10333, CG2807, ADAR	1203	194	7937	1.66642	0.441191	0.0144434	0.474834
Annotation Cluster 6	Enrichment Score: 4.971628158581346
Category	Term	Count	%	PValue	Genes	List Total	Pop Hits	Pop Total	Fold Enrichment	Bonferroni	Benjamini	FDR
GOTERM_BP_FAT	GO:0010324~membrane invagination	69	2.34694	1.52037e-06	CG6197, ARF72A, CG5844, CG5591, BRE1, CG16791, ATPSYN-GAMMA, CCT1, CG6191, CG10194, CG31064, CDC42, ALPHA-ADAPTIN, ALPHACOP, CG5745, AP-2SIGMA, CG4552, ARC-P20, AP-1GAMMA, CG5853, CG5715, ATPSYN-B, ARF79F, CG4615, BRWD3, CG5198, ARF102F, CG3638, ARF51F, ATX2, CG6479, AUX, CG34422, CG5599, AP-47, CG10778, BLW, CG5720, AMPH, BETACOP, CENB1A, ACT5C, CED-6, BAP170, CACT, AP-50, CG11652, CG12077, BRAT…	1203	258	7937	1.76449	0.00321194	0.000292422	0.00263118
GOTERM_BP_FAT	GO:0006897~endocytosis	69	2.34694	1.52037e-06	CG6197, ARF72A, CG5844, CG5591, BRE1, CG16791, ATPSYN-GAMMA, CCT1, CG6191, CG10194, CG31064, CDC42, ALPHA-ADAPTIN, ALPHACOP, CG5745, AP-2SIGMA, CG4552, ARC-P20, AP-1GAMMA, CG5853, CG5715, ATPSYN-B, ARF79F, CG4615, BRWD3, CG5198, ARF102F, CG3638, ARF51F, ATX2, CG6479, AUX, CG34422, CG5599, AP-47, CG10778, BLW, CG5720, AMPH, BETACOP, CENB1A, ACT5C, CED-6, BAP170, CACT, AP-50, CG11652, CG12077, BRAT…	1203	258	7937	1.76449	0.00321194	0.000292422	0.00263118
GOTERM_BP_FAT	GO:0016044~membrane organization	79	2.68707	6.03332e-06	CG6197, ARF72A, CG5844, CG5591, BRE1, CG16791, ATPSYN-GAMMA, CG31229, CCT1, CG34132, CG6191, CG10194, BETA-SPEC, CG31064, CDC42, ALPHA-ADAPTIN, ALPHACOP, CG5745, AP-2SIGMA, CG4552, ARC-P20, AP-1GAMMA, CG5853, CG5715, ATPSYN-B, ARF79F, CG4615, BRWD3, CG5198, ARF102F, CG3638, ARF51F, AUX, ATX2, CG6479, CG34422, CG5599, CDASE, AP-47, CG10778, BETA'COP, BLW, CG5720, AMPH, BETACOP, CENB1A, ACT5C, CED-…	1203	319	7937	1.63391	0.0126854	0.000850741	0.010441
GOTERM_BP_FAT	GO:0006909~phagocytosis	54	1.83673	1.15723e-05	CG6197, CG5844, CG5591, BRE1, CG16791, ATPSYN-GAMMA, CG6191, CG10194, CDC42, CG31064, ALPHACOP, CG5745, CG4552, ARC-P20, CG5853, ATPSYN-B, CG5715, CG4615, BRWD3, CG5198, CG3638, CG6479, ATX2, CG5599, CG34422, CG10778, BLW, CG5720, CENB1A, ACT5C, BETACOP, CED-6, BAP170, CACT, CG11652, CG12077, BRAT, CG17754, CG5861, CG10068, CG2158, CDC23, CG30427, AXN, CG6364, CALPA, BRM, ALIEN, CG6091, CED-12, C…	1203	197	7937	1.8085	0.0241898	0.00128797	0.0200256
GOTERM_BP_FAT	GO:0006911~phagocytosis, engulfment	51	1.73469	2.43891e-05	CG6197, CG5844, CG5591, BRE1, ATPSYN-GAMMA, CG16791, CG6191, CG10194, CDC42, CG31064, CG5745, ALPHACOP, CG4552, ARC-P20, CG5853, ATPSYN-B, CG5715, CG4615, BRWD3, CG5198, CG3638, CG6479, ATX2, CG5599, CG34422, CG10778, BLW, CG5720, CENB1A, ACT5C, BETACOP, BAP170, CACT, CG11652, CG12077, BRAT, CG17754, CG5861, CG2158, CDC23, CG30427, AXN, CG6364, CALPA, BRM, ALIEN, CG6091, CG6359, ACT42A, ABI, ARP6…	1203	187	7937	1.79937	0.0502988	0.0022413	0.0422002
GOTERM_BP_FAT	GO:0016192~vesicle-mediated transport	85	2.89116	0.000375976	CG6197, ARF72A, CG5844, CG5591, BRE1, CG16791, ATPSYN-GAMMA, CG5161, CCT1, CG6191, CG10194, CG31064, CDC42, ALPHA-ADAPTIN, ALPHACOP, CG5745, AP-2SIGMA, CAR, CG6623, CG4552, ARC-P20, AP-1GAMMA, CG5853, CG5715, ATPSYN-B, ARF79F, CG4615, BRWD3, CG5198, ARF102F, CG3638, ARF51F, AUX, ATX2, CG6479, CG34422, CG5599, CDASE, BTSZ, AP-47, CG10778, CANB2, CG10882, BETA'COP, BLW, CG5720, CG3071, AMPH, BETACO…	1203	391	7937	1.43428	0.548742	0.0183348	0.648688
Annotation Cluster 7	Enrichment Score: 3.473560709165529
Category	Term	Count	%	PValue	Genes	List Total	Pop Hits	Pop Total	Fold Enrichment	Bonferroni	Benjamini	FDR
GOTERM_BP_FAT	GO:0070085~glycosylation	19	0.646259	0.000165063	CG2975, CG1518, CG10166, CG4542, CG18012, CG6370, CG33145, CG3792, CG34056, CG31849, CG11357, CG11851, CG33303, CG5091, BRN, CG3038, ALPHA-MAN-II, ALPHA-MAN-I, ALG10	1203	49	7937	2.55828	0.29482	0.00993044	0.285281
GOTERM_BP_FAT	GO:0006486~protein amino acid glycosylation	19	0.646259	0.000165063	CG2975, CG1518, CG10166, CG4542, CG18012, CG6370, CG33145, CG3792, CG34056, CG31849, CG11357, CG11851, CG33303, CG5091, BRN, CG3038, ALPHA-MAN-II, ALPHA-MAN-I, ALG10	1203	49	7937	2.55828	0.29482	0.00993044	0.285281
GOTERM_BP_FAT	GO:0043413~biopolymer glycosylation	19	0.646259	0.000165063	CG2975, CG1518, CG10166, CG4542, CG18012, CG6370, CG33145, CG3792, CG34056, CG31849, CG11357, CG11851, CG33303, CG5091, BRN, CG3038, ALPHA-MAN-II, ALPHA-MAN-I, ALG10	1203	49	7937	2.55828	0.29482	0.00993044	0.285281
GOTERM_BP_FAT	GO:0009100~glycoprotein metabolic process	23	0.782313	0.000170939	CG2975, CG1518, BETA4GALT7, CG10166, CG4542, CG18012, CG6370, CG33145, CG3792, CG34056, CG31849, CG1827, CG11357, CG11851, CG33303, CG5091, BRN, CG3038, ALPHA-MAN-II, ALPHA-MAN-I, CG12913, ALG10, BOTV	1203	66	7937	2.29919	0.303535	0.00999795	0.295421
GOTERM_BP_FAT	GO:0009101~glycoprotein biosynthetic process	22	0.748299	0.000238773	CG2975, CG1518, BETA4GALT7, CG10166, CG4542, CG18012, CG6370, CG33145, CG3792, CG34056, CG31849, CG11357, CG11851, CG33303, CG5091, BRN, CG3038, ALPHA-MAN-II, ALPHA-MAN-I, CG12913, ALG10, BOTV	1203	63	7937	2.30395	0.396678	0.0132095	0.412427
GOTERM_BP_FAT	GO:0006487~protein amino acid N-linked glycosylation	7	0.238095	0.00784978	CG5091, CG4542, ALPHA-MAN-II, ALPHA-MAN-I, CG6370, ALG10, CG31849	1203	13	7937	3.55259	1	0.211974	12.7495
Annotation Cluster 8	Enrichment Score: 3.394607659217854
Category	Term	Count	%	PValue	Genes	List Total	Pop Hits	Pop Total	Fold Enrichment	Bonferroni	Benjamini	FDR
GOTERM_BP_FAT	GO:0042775~mitochondrial ATP synthesis coupled electron transport	27	0.918367	1.88754e-06	CG11015, CG4769, CG10320, CG3192, CG5703, CG3560, CG1970, CG4169, CG3214, CG18624, CG3683, CG6020, CG32649, CG14482, CG11455, CG3621, CG3731, CG12859, CG5548, CG6463, CG10664, CG12895, CG12400, CG2249, CG11043, CG18809, CG3446	1203	67	7937	2.65876	0.00398608	0.000332782	0.00326661
GOTERM_BP_FAT	GO:0045333~cellular respiration	35	1.19048	6.59641e-06	CG11015, CG4095, CG4769, CG10320, CG3192, CG1970, CG5703, CG3560, CG4169, CG3214, CG18624, CG3683, CG6020, ACON, CG32649, CG14482, CG11455, CG3621, CG3731, CG5214, CG12859, CG5548, CG6463, CG10664, CG10219, CG12895, CG12400, CG18809, CG5362, CG2249, CG11043, CG6439, CG3446, CG5028, CG5599	1203	105	7937	2.19922	0.0138611	0.000820725	0.0114154
GOTERM_BP_FAT	GO:0042773~ATP synthesis coupled electron transport	27	0.918367	6.66884e-06	CG11015, CG4769, CG10320, CG3192, CG5703, CG3560, CG1970, CG4169, CG3214, CG18624, CG3683, CG6020, CG32649, CG14482, CG11455, CG3621, CG3731, CG12859, CG5548, CG6463, CG10664, CG12895, CG12400, CG2249, CG11043, CG18809, CG3446	1203	71	7937	2.50897	0.0140122	0.000783655	0.0115407
GOTERM_BP_FAT	GO:0022904~respiratory electron transport chain	27	0.918367	1.57913e-05	CG11015, CG4769, CG10320, CG3192, CG5703, CG3560, CG1970, CG4169, CG3214, CG18624, CG3683, CG6020, CG32649, CG14482, CG11455, CG3621, CG3731, CG12859, CG5548, CG6463, CG10664, CG12895, CG12400, CG2249, CG11043, CG18809, CG3446	1203	74	7937	2.40726	0.0328625	0.00166934	0.0273255
GOTERM_BP_FAT	GO:0015980~energy derivation by oxidation of organic compounds	36	1.22449	1.80485e-05	CG11015, CG4095, CG4769, CG10320, CG3192, CG1970, CG5703, CG3560, CG4169, CG3214, CG18624, CG3683, CG6020, ACON, CG32649, CG14482, CG11455, CG3621, CG3731, CG5214, CG12859, CG5548, CG6463, BSK, CG10664, CG10219, CG12895, CG12400, CG18809, CG5362, CG2249, CG11043, CG6439, CG3446, CG5028, CG5599	1203	114	7937	2.08348	0.0374709	0.00181697	0.0312309
GOTERM_BP_FAT	GO:0022900~electron transport chain	29	0.986395	9.39764e-05	CG11015, CG4769, CG10320, CG12203, CG3192, CG1970, CG5703, CG3560, CG4169, CG3214, CG18624, CG3683, CG6020, CG32649, CG14482, CG11455, CG3621, CG3731, CG12859, CG5548, CG6463, CG10664, CG10219, CG12895, CG12400, CG18809, CG2249, CG11043, CG3446	1203	90	7937	2.12592	0.180338	0.0068339	0.162515
GOTERM_BP_FAT	GO:0006120~mitochondrial electron transport, NADH to ubiquinone	15	0.510204	0.000218244	CG10320, CG12859, CG3192, CG5548, CG5703, CG1970, CG3214, CG18624, CG6463, CG3683, CG6020, CG12400, CG3446, CG11455, CG3621	1203	34	7937	2.91074	0.369887	0.012405	0.377031
GOTERM_BP_FAT	GO:0006119~oxidative phosphorylation	36	1.22449	0.000463643	CG11015, CG4769, CG10320, CG3192, CG1970, CG5703, CG3560, ATPSYN-GAMMA, CG4169, CG3214, BLW, CG18624, ATPSYN-BETA, CG3683, CG6020, CG32649, CG14482, CG11455, CG3621, CG3731, ATPSYN-D, CG12859, ATPSYN-B, CG5548, CG12140, CG6463, ATPSYN-CF6, CG10664, CG1746, CG12895, CG12400, CG18809, CG3321, CG2249, CG11043, CG3446	1203	132	7937	1.79937	0.625175	0.0215706	0.799373
GOTERM_BP_FAT	GO:0006091~generation of precursor metabolites and energy	49	1.66667	0.00357092	CG11015, CG4769, CG12203, CG3192, CG5703, ATPSYN-GAMMA, CG3560, CG1970, CG4169, ATPSYN-BETA, CG6020, CG32649, CG14482, CG3621, CG3731, ATPSYN-D, ATPSYN-B, CG12140, ATPSYN-CF6, BSK, CG10219, CG2249, CG3321, CG5362, CG12400, CG6439, CG5009, CG5599, CG4095, CG10320, CG12229, CG3214, BLW, CG18624, CG3683, ACON, CG11455, CG12859, CG5214, CG5548, CG6463, CG10664, CG1746, CG12895, CG11043, CG11249, CG18…	1203	217	7937	1.4898	0.999484	0.118526	6.00328
GOTERM_MF_FAT	GO:0003954~NADH dehydrogenase activity	17	0.578231	0.00404445	CG10320, CG12859, CG12203, CG3192, CG1970, CG5548, CG5703, CG3214, CG18624, CG6463, CG3683, CG6020, CG12400, CG3446, CG11455, CG12079, CG3621	1510	43	7918	2.07309	0.986539	0.170808	6.24913
GOTERM_MF_FAT	GO:0050136~NADH dehydrogenase (quinone) activity	13	0.442177	0.0299784	CG10320, CG12203, CG3192, CG5548, CG5703, CG1970, CG3214, CG6463, CG3683, CG6020, CG12400, CG12079, CG3621	1510	36	7918	1.89356	1	0.545762	38.408
GOTERM_MF_FAT	GO:0008137~NADH dehydrogenase (ubiquinone) activity	13	0.442177	0.0299784	CG10320, CG12203, CG3192, CG5548, CG5703, CG1970, CG3214, CG6463, CG3683, CG6020, CG12400, CG12079, CG3621	1510	36	7918	1.89356	1	0.545762	38.408
GOTERM_MF_FAT	GO:0016655~oxidoreductase activity, acting on NADH or NADPH, quinone or similar compound as acceptor	13	0.442177	0.0299784	CG10320, CG12203, CG3192, CG5548, CG5703, CG1970, CG3214, CG6463, CG3683, CG6020, CG12400, CG12079, CG3621	1510	36	7918	1.89356	1	0.545762	38.408
GOTERM_MF_FAT	GO:0016651~oxidoreductase activity, acting on NADH or NADPH	17	0.578231	0.0341325	CG10320, CG12859, CG12203, CG3192, CG1970, CG5548, CG5703, CG3214, CG18624, CG6463, CG3683, CG6020, CG12400, CG3446, CG11455, CG12079, CG3621	1510	53	7918	1.68194	1	0.576212	42.4763
Annotation Cluster 9	Enrichment Score: 3.1855034055607216
Category	Term	Count	%	PValue	Genes	List Total	Pop Hits	Pop Total	Fold Enrichment	Bonferroni	Benjamini	FDR
GOTERM_BP_FAT	GO:0006644~phospholipid metabolic process	28	0.952381	6.66637e-05	CG12034, CCT1, CG30184, CG4406, CG30503, CG12077, CG11190, CG42271, CG3376, CG14507, CDSA, CG3876, CG32699, CG6401, CG2292, CG5508, CG10082, CG33116, CG11851, CG17471, CG15743, CG4774, CG3033, CG4825, CG12006, CG13089, CG10260, CG3271	1203	84	7937	2.19922	0.131567	0.00541089	0.115308
GOTERM_BP_FAT	GO:0008654~phospholipid biosynthetic process	19	0.646259	0.000121381	CG3876, CG32699, CG6401, CCT1, CG2292, CG5508, CG33116, CG11851, CG15743, CG4774, CG3033, CG4825, CG4406, CG11190, CG12077, CG12006, CG13089, CDSA, CG3271	1203	48	7937	2.61158	0.226523	0.00852541	0.20986
GOTERM_BP_FAT	GO:0046474~glycerophospholipid biosynthetic process	15	0.510204	0.000148925	CG3876, CG6401, CCT1, CG2292, CG11851, CG15743, CG3033, CG4825, CG4406, CG11190, CG12077, CG13089, CG12006, CDSA, CG3271	1203	33	7937	2.99894	0.27032	0.00950453	0.257423
GOTERM_BP_FAT	GO:0019637~organophosphate metabolic process	30	1.02041	0.00015603	CG12034, CCT1, CG30184, CG1271, CG31169, CG4406, CG30503, CG12077, CG11190, CG42271, CG3376, CG14507, CDSA, CG3876, CG32699, CG6401, CG2292, CG5508, CG10082, CG33116, CG11851, CG17471, CG15743, CG4774, CG3033, CG4825, CG12006, CG13089, CG10260, CG3271	1203	97	7937	2.04052	0.281209	0.00966432	0.269688
GOTERM_BP_FAT	GO:0008610~lipid biosynthetic process	34	1.15646	0.000275732	CG31005, CG1998, CG10932, CCT1, ALPHA4GT1, CG11198, CG16935, CG33671, CG4406, CG12077, CG30502, CG11190, CDSA, CG10602, CG3876, CG32699, CG5919, CG10268, CG6401, CG31522, CG2292, CG5508, CG31523, CG33116, CG11851, CG15743, CG4774, CG3033, BRN, CG4825, CG13089, CG12006, CG10585, CG3271	1203	119	7937	1.88505	0.442074	0.0141316	0.47612
GOTERM_BP_FAT	GO:0045017~glycerolipid biosynthetic process	15	0.510204	0.000442505	CG3876, CG6401, CCT1, CG2292, CG11851, CG15743, CG3033, CG4825, CG4406, CG11190, CG12077, CG13089, CG12006, CDSA, CG3271	1203	36	7937	2.74903	0.608021	0.0210602	0.763059
GOTERM_BP_FAT	GO:0006650~glycerophospholipid metabolic process	19	0.646259	0.000653672	CG3876, CG6401, CCT1, CG2292, CG10082, CG11851, CG17471, CG15743, CG3033, CG4825, CG4406, CG11190, CG12077, CG12006, CG13089, CG10260, CG42271, CDSA, CG3271	1203	54	7937	2.3214	0.749331	0.0296309	1.12526
GOTERM_BP_FAT	GO:0042158~lipoprotein biosynthetic process	13	0.442177	0.00118187	CG2976, CG3876, CG6401, CG2292, CG11851, CG3033, CG4406, CG11190, CG12077, CG13089, CG12006, CG12007, CG3271	1203	31	7937	2.76677	0.918105	0.0507961	2.0258
GOTERM_BP_FAT	GO:0006497~protein amino acid lipidation	13	0.442177	0.00118187	CG2976, CG3876, CG6401, CG2292, CG11851, CG3033, CG4406, CG11190, CG12077, CG13089, CG12006, CG12007, CG3271	1203	31	7937	2.76677	0.918105	0.0507961	2.0258
GOTERM_BP_FAT	GO:0006506~GPI anchor biosynthetic process	11	0.37415	0.00156946	CG3876, CG3033, CG6401, CG2292, CG4406, CG12077, CG11190, CG12006, CG13089, CG3271, CG11851	1203	24	7937	3.02393	0.963977	0.0643108	2.68169
GOTERM_BP_FAT	GO:0042157~lipoprotein metabolic process	13	0.442177	0.00163407	CG2976, CG3876, CG6401, CG2292, CG11851, CG3033, CG4406, CG11190, CG12077, CG13089, CG12006, CG12007, CG3271	1203	32	7937	2.6803	0.968587	0.0656026	2.79062
GOTERM_BP_FAT	GO:0046489~phosphoinositide biosynthetic process	12	0.408163	0.00163761	CG15743, CG3876, CG3033, CG6401, CG2292, CG4406, CG12077, CG11190, CG12006, CG13089, CG3271, CG11851	1203	28	7937	2.82757	0.968822	0.0645176	2.79659
GOTERM_BP_FAT	GO:0030384~phosphoinositide metabolic process	16	0.544218	0.00231175	CG3876, CG6401, CG2292, CG10082, CG11851, CG17471, CG15743, CG3033, CG4406, CG11190, CG12077, CG12006, CG13089, CG10260, CG42271, CG3271	1203	46	7937	2.29484	0.992533	0.0867003	3.92628
GOTERM_BP_FAT	GO:0046486~glycerolipid metabolic process	19	0.646259	0.00254412	CG3876, CG6401, CCT1, CG2292, CG10082, CG11851, CG17471, CG15743, CG3033, CG4825, CG4406, CG11190, CG12077, CG12006, CG13089, CG10260, CG42271, CDSA, CG3271	1203	60	7937	2.08926	0.995439	0.0917665	4.31279
GOTERM_BP_FAT	GO:0006505~GPI anchor metabolic process	11	0.37415	0.0031887	CG3876, CG3033, CG6401, CG2292, CG4406, CG12077, CG11190, CG12006, CG13089, CG3271, CG11851	1203	26	7937	2.79132	0.998839	0.109986	5.37733
Annotation Cluster 10	Enrichment Score: 2.9983077702334517
Category	Term	Count	%	PValue	Genes	List Total	Pop Hits	Pop Total	Fold Enrichment	Bonferroni	Benjamini	FDR
GOTERM_BP_FAT	GO:0051186~cofactor metabolic process	32	1.08844	0.000147108	CG4095, CG30410, CG17333, CG17904, CG4747, CG3156, ACON, ALAS, CG30493, CG32174, CG12264, CG2453, CG3714, CG5037, CG34424, CG5214, CG17691, CG17683, ATPCL, CG13090, CG14721, CG13623, CG10219, CG1749, CG2543, CG5362, CG6439, CG5261, CG5028, CG15093, CG5599, CG6178	1203	106	7937	1.99175	0.267508	0.00968103	0.254285
GOTERM_BP_FAT	GO:0051188~cofactor biosynthetic process	21	0.714286	0.000333753	CG34424, CG17691, CG17904, CG17683, ATPCL, CG3156, CG13090, CG14721, CG13623, ALAS, CG30493, CG32174, CG1749, CG12264, CG2543, CG2453, CG3714, CG5037, CG5261, CG5599, CG6178	1203	60	7937	2.30919	0.506553	0.016677	0.576037
GOTERM_BP_FAT	GO:0006732~coenzyme metabolic process	25	0.85034	0.00229665	CG4095, CG30410, CG17333, CG4747, ACON, CG30493, CG32174, CG2453, CG3714, CG34424, CG17691, CG5214, ATPCL, CG13090, CG14721, CG10219, CG1749, CG2543, CG5362, CG6439, CG5261, CG5028, CG15093, CG5599, CG6178	1203	88	7937	1.87434	0.99229	0.0877106	3.90111
GOTERM_BP_FAT	GO:0009108~coenzyme biosynthetic process	14	0.47619	0.00900771	CG34424, CG17691, ATPCL, CG13090, CG14721, CG30493, CG1749, CG32174, CG2543, CG2453, CG3714, CG5261, CG5599, CG6178	1203	43	7937	2.14808	1	0.227975	14.4952
Annotation Cluster 11	Enrichment Score: 2.404886469146896
Category	Term	Count	%	PValue	Genes	List Total	Pop Hits	Pop Total	Fold Enrichment	Bonferroni	Benjamini	FDR
GOTERM_MF_FAT	GO:0016860~intramolecular oxidoreductase activity	13	0.442177	0.00222167	CG30410, CG5919, CG5844, CABP1, CG4594, CG5554, CG4598, CG1837, CG4592, CG5611, CG13890, CG5027, BETA4GALNACTA	1510	27	7918	2.52475	0.905981	0.111493	3.47946
GOTERM_MF_FAT	GO:0016863~intramolecular oxidoreductase activity, transposing C=C bonds	7	0.238095	0.00492572	CG4592, CG5919, CG5844, CG5611, CG13890, CG4594, CG4598	1510	10	7918	3.6706	0.994747	0.196443	7.56131
GOTERM_MF_FAT	GO:0004165~dodecenoyl-CoA delta-isomerase activity	5	0.170068	0.00557433	CG4592, CG5844, CG13890, CG4594, CG4598	1510	5	7918	5.24371	0.997373	0.204307	8.51606
Annotation Cluster 12	Enrichment Score: 1.9457318561187342
Category	Term	Count	%	PValue	Genes	List Total	Pop Hits	Pop Total	Fold Enrichment	Bonferroni	Benjamini	FDR
GOTERM_BP_FAT	GO:0000381~regulation of alternative nuclear mRNA splicing, via spliceosome	17	0.578231	0.00871652	CG6197, CG4119, CG6227, CG5728, CG10445, CG2926, B52, CG1646, CG16941, CG11266, CG10418, CG11360, CG5931, CG17454, CG14641, BL, CG17768	1203	57	7937	1.96773	1	0.224128	14.0593
GOTERM_BP_FAT	GO:0048024~regulation of nuclear mRNA splicing, via spliceosome	18	0.612245	0.0105807	CG6197, CG4119, CG6227, CG5728, CG10445, CG2926, B52, CG1646, CG16941, CG11266, ASF1, CG10418, CG11360, CG5931, CG17454, CG14641, BL, CG17768	1203	63	7937	1.88505	1	0.245236	16.8138
GOTERM_BP_FAT	GO:0050684~regulation of mRNA processing	18	0.612245	0.0105807	CG6197, CG4119, CG6227, CG5728, CG10445, CG2926, B52, CG1646, CG16941, CG11266, ASF1, CG10418, CG11360, CG5931, CG17454, CG14641, BL, CG17768	1203	63	7937	1.88505	1	0.245236	16.8138
GOTERM_BP_FAT	GO:0043484~regulation of RNA splicing	18	0.612245	0.0168929	CG6197, CG4119, CG6227, CG5728, CG10445, CG2926, B52, CG1646, CG16941, CG11266, ASF1, CG10418, CG11360, CG5931, CG17454, CG14641, BL, CG17768	1203	66	7937	1.79937	1	0.324198	25.5358
Annotation Cluster 13	Enrichment Score: 1.846402064286758
Category	Term	Count	%	PValue	Genes	List Total	Pop Hits	Pop Total	Fold Enrichment	Bonferroni	Benjamini	FDR
GOTERM_BP_FAT	GO:0006631~fatty acid metabolic process	18	0.612245	0.00148703	CG10602, CG1998, CG17544, CG3267, CG10932, CG31522, CG6543, ACOX57D-P, CG31523, CG12262, BGM, CG11198, CG16935, CG30502, CG5315, CG5009, CG4389, CG6178	1203	53	7937	2.24072	0.957101	0.062242	2.54255
GOTERM_MF_FAT	GO:0003995~acyl-CoA dehydrogenase activity	9	0.306122	0.00306012	CG12262, ARC42, CG4860, CG17544, CG11637, CG3902, CG5009, ACOX57D-P, CG6638	1510	15	7918	3.14623	0.961531	0.137643	4.76285
GOTERM_BP_FAT	GO:0044242~cellular lipid catabolic process	11	0.37415	0.0031887	BWA, CG12262, CG17544, CG3267, CG6543, CG5009, CG33090, CG4389, ACOX57D-P, CG3376, CDASE	1203	26	7937	2.79132	0.998839	0.109986	5.37733
GOTERM_BP_FAT	GO:0019395~fatty acid oxidation	7	0.238095	0.00484045	CG12262, CG17544, CG6543, CG5315, CG5009, CG4389, ACOX57D-P	1203	12	7937	3.84864	0.999965	0.148219	8.05449
GOTERM_BP_FAT	GO:0009062~fatty acid catabolic process	7	0.238095	0.00484045	CG12262, CG17544, CG3267, CG6543, CG5009, CG4389, ACOX57D-P	1203	12	7937	3.84864	0.999965	0.148219	8.05449
GOTERM_BP_FAT	GO:0034440~lipid oxidation	7	0.238095	0.00484045	CG12262, CG17544, CG6543, CG5315, CG5009, CG4389, ACOX57D-P	1203	12	7937	3.84864	0.999965	0.148219	8.05449
GOTERM_BP_FAT	GO:0016042~lipid catabolic process	15	0.510204	0.00516512	CG17544, CG3267, CG6543, CG33090, ACOX57D-P, CG30184, BWA, CG12262, CG11055, CG30503, CG5009, CG4389, CG3376, CG14507, CDASE	1203	45	7937	2.19922	0.999983	0.155137	8.57226
GOTERM_BP_FAT	GO:0006635~fatty acid beta-oxidation	6	0.204082	0.0164627	CG12262, CG17544, CG6543, CG5009, CG4389, ACOX57D-P	1203	11	7937	3.59873	1	0.323132	24.97
GOTERM_BP_FAT	GO:0046395~carboxylic acid catabolic process	13	0.442177	0.0318373	CG5235, CG6415, CG17544, CG3267, CG6543, ACOX57D-P, CG12262, CG3626, CG14681, CG34355, CG5009, CG6638, CG4389	1203	45	7937	1.90599	1	0.488911	42.8763
GOTERM_BP_FAT	GO:0016054~organic acid catabolic process	13	0.442177	0.0318373	CG5235, CG6415, CG17544, CG3267, CG6543, ACOX57D-P, CG12262, CG3626, CG14681, CG34355, CG5009, CG6638, CG4389	1203	45	7937	1.90599	1	0.488911	42.8763
GOTERM_BP_FAT	GO:0030258~lipid modification	9	0.306122	0.0335194	CG12262, CG17544, CG6543, CG5315, CG5009, CG10260, CG42271, CG4389, ACOX57D-P	1203	26	7937	2.28381	1	0.496955	44.5697
GOTERM_MF_FAT	GO:0003997~acyl-CoA oxidase activity	3	0.102041	0.321489	CG17544, CG5009, ACOX57D-P	1510	6	7918	2.62185	1	0.983128	99.7921
GOTERM_MF_FAT	GO:0016634~oxidoreductase activity, acting on the CH-CH group of donors, oxygen as acceptor	3	0.102041	0.649418	CG17544, CG5009, ACOX57D-P	1510	11	7918	1.4301	1	0.999489	100
Annotation Cluster 14	Enrichment Score: 1.7367063810488814
Category	Term	Count	%	PValue	Genes	List Total	Pop Hits	Pop Total	Fold Enrichment	Bonferroni	Benjamini	FDR
GOTERM_BP_FAT	GO:0042364~water-soluble vitamin biosynthetic process	7	0.238095	0.00484045	CG11899, CG3714, CG34455, CG2846, CG31473, CG31472, CG14721	1203	12	7937	3.84864	0.999965	0.148219	8.05449
GOTERM_BP_FAT	GO:0006767~water-soluble vitamin metabolic process	7	0.238095	0.0120019	CG11899, CG3714, CG34455, CG2846, CG31473, CG31472, CG14721	1203	14	7937	3.29884	1	0.267711	18.8577
GOTERM_BP_FAT	GO:0009110~vitamin biosynthetic process	7	0.238095	0.0120019	CG11899, CG3714, CG34455, CG2846, CG31473, CG31472, CG14721	1203	14	7937	3.29884	1	0.267711	18.8577
GOTERM_BP_FAT	GO:0042819~vitamin B6 biosynthetic process	4	0.136054	0.0272775	CG11899, CG34455, CG31473, CG31472	1203	5	7937	5.27814	1	0.446294	38.037
GOTERM_BP_FAT	GO:0042816~vitamin B6 metabolic process	4	0.136054	0.0272775	CG11899, CG34455, CG31473, CG31472	1203	5	7937	5.27814	1	0.446294	38.037
GOTERM_BP_FAT	GO:0008614~pyridoxine metabolic process	4	0.136054	0.0272775	CG11899, CG34455, CG31473, CG31472	1203	5	7937	5.27814	1	0.446294	38.037
GOTERM_BP_FAT	GO:0008615~pyridoxine biosynthetic process	4	0.136054	0.0272775	CG11899, CG34455, CG31473, CG31472	1203	5	7937	5.27814	1	0.446294	38.037
GOTERM_BP_FAT	GO:0006766~vitamin metabolic process	7	0.238095	0.033094	CG11899, CG3714, CG34455, CG2846, CG31473, CG31472, CG14721	1203	17	7937	2.71669	1	0.495774	44.146
Annotation Cluster 15	Enrichment Score: 1.699216423847295
Category	Term	Count	%	PValue	Genes	List Total	Pop Hits	Pop Total	Fold Enrichment	Bonferroni	Benjamini	FDR
GOTERM_MF_FAT	GO:0016790~thiolester hydrolase activity	17	0.578231	0.00170046	CG30421, CG4390, CG4603, CG5044, CG4165, CG3016, CG5384, CG32479, CG4365, CG4968, CG12082, CG30157, CG5798, CG14619, CG16979, CG15817, CG5794	1510	40	7918	2.22858	0.836204	0.0956215	2.67352
GOTERM_BP_FAT	GO:0019941~modification-dependent protein catabolic process	39	1.32653	0.00674552	CG11070, CG4603, ATG12, BRE1, AOS1, CG4165, CG40045, AGO, AUT1, CG3356, CG32479, CG4238, CG4502, CG14619, CG11419, CG16979, CG5087, CG30421, AS, CG32486, CG10908, CG11261, ATE1, CG3016, CG5384, CG4673, CG4968, CG12084, CG5604, CG3099, ARI-1, CG12082, CG30157, ARI-2, CG5798, CG13343, BEN, CG15817, CG5794	1203	169	7937	1.52254	0.999999	0.189915	11.0536
GOTERM_BP_FAT	GO:0043632~modification-dependent macromolecule catabolic process	39	1.32653	0.00745708	CG11070, CG4603, ATG12, BRE1, AOS1, CG4165, CG40045, AGO, AUT1, CG3356, CG32479, CG4238, CG4502, CG14619, CG11419, CG16979, CG5087, CG30421, AS, CG32486, CG10908, CG11261, ATE1, CG3016, CG5384, CG4673, CG4968, CG12084, CG5604, CG3099, ARI-1, CG12082, CG30157, ARI-2, CG5798, CG13343, BEN, CG15817, CG5794	1203	170	7937	1.51358	1	0.205101	12.1499
GOTERM_BP_FAT	GO:0051603~proteolysis involved in cellular protein catabolic process	41	1.39456	0.00908582	CG17370, CG11070, CG4603, ATG12, BRE1, AOS1, CG17331, CG4165, CG40045, AGO, AUT1, CG3356, CG32479, CG4238, CG4502, CG14619, CG11419, CG16979, CG5087, CG30421, AS, CG32486, CG10908, CG11261, ATE1, CG3016, CG5384, CG4673, CG4968, CG12084, CG5604, CG3099, ARI-1, CG12082, CG5798, CG30157, ARI-2, CG13343, BEN, CG15817, CG5794	1203	183	7937	1.47817	1	0.227028	14.6117
GOTERM_BP_FAT	GO:0044257~cellular protein catabolic process	41	1.39456	0.00908582	CG17370, CG11070, CG4603, ATG12, BRE1, AOS1, CG17331, CG4165, CG40045, AGO, AUT1, CG3356, CG32479, CG4238, CG4502, CG14619, CG11419, CG16979, CG5087, CG30421, AS, CG32486, CG10908, CG11261, ATE1, CG3016, CG5384, CG4673, CG4968, CG12084, CG5604, CG3099, ARI-1, CG12082, CG5798, CG30157, ARI-2, CG13343, BEN, CG15817, CG5794	1203	183	7937	1.47817	1	0.227028	14.6117
GOTERM_BP_FAT	GO:0030163~protein catabolic process	44	1.4966	0.00942859	CG17370, CG11070, CG4603, ATG12, BRE1, AOS1, CG6512, CG17331, CG4165, CG40045, CG3499, AGO, AUT1, CG3356, CG32479, CG4238, CG4502, CG14619, CG11419, CG16979, CG5087, CG30421, AS, CG32486, CG2658, CG10908, CG11261, ATE1, CG3016, CG5384, CG4968, CG12084, CG4673, CG5604, CG3099, ARI-1, CG12082, CG5798, ARI-2, CG30157, CG13343, BEN, CG15817, CG5794	1203	200	7937	1.45149	1	0.23184	15.1215
GOTERM_BP_FAT	GO:0044265~cellular macromolecule catabolic process	46	1.56463	0.0276998	CG17370, CG11070, CG4603, ATG12, BRE1, AOS1, CG17331, CG4165, CG40045, AGO, AUT1, CG3356, CG32479, CG11337, CG4238, CG4502, CG6729, CG14619, CG11419, CG16979, CG5087, CG30421, AS, CG32486, CG3857, CG10908, CG2091, CG11261, ATE1, CG3016, CG5384, ARMI, CG4968, CG12084, CG4673, CG5604, CG3099, ARI-1, CG12082, CG5798, ARI-2, CG30157, CG13343, BEN, CG15817, CG5794	1203	225	7937	1.34886	1	0.448106	38.5009
GOTERM_MF_FAT	GO:0004221~ubiquitin thiolesterase activity	10	0.340136	0.0847012	CG3016, CG30421, CG5384, CG32479, CG12082, CG5798, CG14619, CG4165, CG15817, CG5794	1510	29	7918	1.80818	1	0.802512	75.567
GOTERM_BP_FAT	GO:0009057~macromolecule catabolic process	50	1.70068	0.132673	CG17370, BRE1, AOS1, CG6512, CG17331, CG4165, CG40045, AUT1, CG11337, CG4238, CG6729, CG14619, AS, CG32486, CG2658, CG10908, CG11261, CG1827, CG3016, CG12084, CG4968, CG3099, CG12082, CG5798, CG5794, CG11070, CG4603, ATG12, CG3499, AGO, CG3356, CG32479, CG4502, CG16979, CG11419, CG5087, CG30421, CG3857, CG2091, ATE1, CG5384, ARMI, CG4673, CG5604, ARI-1, ARI-2, CG30157, CG13343, BEN, CG15817	1203	277	7937	1.19092	1	0.881885	91.4853
GOTERM_BP_FAT	GO:0006511~ubiquitin-dependent protein catabolic process	16	0.544218	0.491315	CG30421, CG11070, CG32486, CG10908, CG11261, CG4165, ATE1, CG3016, CG5384, AGO, CG32479, CG12082, CG5798, CG14619, CG15817, CG5794	1203	96	7937	1.09961	1	0.998498	99.9992
Annotation Cluster 16	Enrichment Score: 1.6780543283952931
Category	Term	Count	%	PValue	Genes	List Total	Pop Hits	Pop Total	Fold Enrichment	Bonferroni	Benjamini	FDR
GOTERM_BP_FAT	GO:0048488~synaptic vesicle endocytosis	13	0.442177	0.00390173	AP-47, ARF72A, AP-1GAMMA, ARF79F, AMPH, ALPHA-ADAPTIN, ARF102F, AP-1SIGMA, AP-50, AP-2SIGMA, AUX, ARF51F, ARF84F	1203	35	7937	2.45056	0.999744	0.124905	6.5419
GOTERM_BP_FAT	GO:0006471~protein amino acid ADP-ribosylation	6	0.204082	0.0164627	ARF72A, ARF102F, CG30054, ARF51F, ARF79F, ARF84F	1203	11	7937	3.59873	1	0.323132	24.97
GOTERM_BP_FAT	GO:0016197~endosome transport	7	0.238095	0.143906	ARF72A, CG33635, ARF102F, CAR, ARF51F, ARF79F, ARF84F	1203	24	7937	1.92432	1	0.898037	93.2049
Annotation Cluster 17	Enrichment Score: 1.6374819084128074
Category	Term	Count	%	PValue	Genes	List Total	Pop Hits	Pop Total	Fold Enrichment	Bonferroni	Benjamini	FDR
GOTERM_MF_FAT	GO:0035091~phosphoinositide binding	11	0.37415	0.00621859	AKT1, CG2774, CG6410, CG1514, CG6359, CG3077, CG32758, CG11807, CG5439, BETA-SPEC, CG5734	1510	23	7918	2.50786	0.998681	0.210868	9.45526
GOTERM_MF_FAT	GO:0005543~phospholipid binding	16	0.544218	0.0130845	CG2774, CG6410, CG1514, CG6180, ANXB11, CG11807, BETA-SPEC, CG5734, AKT1, ANNIX, CG6359, CG3077, CG4877, CG32758, CG5439, ANNX	1510	44	7918	1.9068	0.999999	0.372925	18.9186
GOTERM_MF_FAT	GO:0008289~lipid binding	29	0.986395	0.15035	CG6410, CG33713, CG14232, CG10657, CG11807, BETA-SPEC, CG11534, ANNIX, AKT1, CG4877, CG5439, CG17896, ANNX, CG2774, CG1513, CG1514, APKC, CG6180, ANXB11, CG5734, CG1746, CG30392, CG6359, CG6299, CG3077, CG32758, CG5973, CG6613, CG5077	1510	121	7918	1.25676	1	0.915771	92.5302
Annotation Cluster 18	Enrichment Score: 1.510168442797213
Category	Term	Count	%	PValue	Genes	List Total	Pop Hits	Pop Total	Fold Enrichment	Bonferroni	Benjamini	FDR
GOTERM_BP_FAT	GO:0006796~phosphate metabolic process	111	3.77551	0.000936287	CG5703, CG4169, CDC14, BABO, CG5288, CG6020, CG32649, CAD96CA, 5PTASEI, CG10417, CG13197, CG3731, CG10089, CG5110, BALL, CG10082, ATPSYN-CF6, BSK, CG3321, CG17598, ARGK, CG15072, CG3530, CG10320, CAMKI, CG18624, BLW, CG10673, CG4802, CG1271, CDI, CG33671, ACK, CG4294, CG11455, CG32666, CG42271, CG11597, CG12859, CG34140, CG11859, CG6463, ATG1, CG17528, CG17471, CG10664, CG11043, CDC2C, CG3446, AS…	1203	551	7937	1.32911	0.862222	0.0412957	1.60806
GOTERM_BP_FAT	GO:0006793~phosphorus metabolic process	111	3.77551	0.000936287	CG5703, CG4169, CDC14, BABO, CG5288, CG6020, CG32649, CAD96CA, 5PTASEI, CG10417, CG13197, CG3731, CG10089, CG5110, BALL, CG10082, ATPSYN-CF6, BSK, CG3321, CG17598, ARGK, CG15072, CG3530, CG10320, CAMKI, CG18624, BLW, CG10673, CG4802, CG1271, CDI, CG33671, ACK, CG4294, CG11455, CG32666, CG42271, CG11597, CG12859, CG34140, CG11859, CG6463, ATG1, CG17528, CG17471, CG10664, CG11043, CDC2C, CG3446, AS…	1203	551	7937	1.32911	0.862222	0.0412957	1.60806
GOTERM_BP_FAT	GO:0016310~phosphorylation	86	2.92517	0.00329922	CG11015, CG4769, CAM, AUR, CG18604, CG3192, CG1970, CG3560, ATPSYN-GAMMA, CG5703, CG4169, BABO, ATPSYN-BETA, CG5288, CG6020, AKT1, CG32649, CG14482, CAD96CA, BUBR1, CG3837, CDC2RK, CG3008, CG3621, CG3731, ATPSYN-D, CDC2, ATPSYN-B, CG5110, CDK8, BALL, APKC, CDK9, CG12140, CDK7, CG11870, CDK4, CDK5, CG10082, BSK, ATPSYN-CF6, BTK29A, CG12400, CG3321, CG2249, ARGK, CG15072, AUX, CG10320, CG3216, CAMK…	1203	425	7937	1.33506	0.999081	0.111766	5.55872
GOTERM_BP_FAT	GO:0006468~protein amino acid phosphorylation	43	1.46259	0.338304	CAM, CG3216, AUR, CG18604, CAMKI, BABO, CG10673, CG1951, AKT1, AWD, CDI, CG3608, CAMKII, CAD96CA, ACK, BUB1, BUBR1, CG3837, CDC2RK, CG3008, CG32666, CG1227, CDC2, CG11859, APKC, BALL, CDK8, CDK9, CDK7, CG4041, CG11870, CDK4, CDK5, CG10082, BSK, ATG1, BTK29A, CG17528, BORR, CDC2C, ASATOR, CG15072, AUX, CG6498	1203	259	7937	1.09537	1	0.989938	99.9213
GOTERM_MF_FAT	GO:0004672~protein kinase activity	46	1.56463	0.929553	CG13850, CG3216, AUR, CG18604, CAMKI, ASP, BABO, CG10673, CG1951, AKT1, CG32649, CDI, CG3608, CAMKII, CAD96CA, ACK, BUB1, CG3837, BUBR1, CDC2RK, CG3008, CG32666, CG1227, CG31643, CDC2, CG11859, APKC, BALL, CDK8, CDK9, CDK7, CG4041, CG11870, CG1344, CDK4, CDK5, BSK, CG34123, ATG1, BTK29A, CG17528, CDC2C, ASATOR, CG11660, CG15072, AUX, CG6498	1510	283	7918	0.852334	1	0.999999	100
GOTERM_MF_FAT	GO:0004674~protein serine/threonine kinase activity	31	1.05442	0.955386	AUR, CG18604, CAMKI, BABO, AKT1, CDI, CAMKII, BUB1, BUBR1, CDC2RK, CG3008, CG32666, CG1227, CDC2, CG11859, APKC, CDK8, BALL, CDK9, CDK7, CG11870, CDK4, CDK5, BSK, ATG1, CG17528, CDC2C, ASATOR, CG11660, CG15072, AUX, CG6498	1510	203	7918	0.800763	1	1	100
Annotation Cluster 19	Enrichment Score: 1.4949539742589288
Category	Term	Count	%	PValue	Genes	List Total	Pop Hits	Pop Total	Fold Enrichment	Bonferroni	Benjamini	FDR
GOTERM_BP_FAT	GO:0032313~regulation of Rab GTPase activity	11	0.37415	0.0031887	CG4552, CG17883, CG16896, CG5978, CG5745, CG11490, CG12241, CG6182, CG5916, CG11727, CG4041	1203	26	7937	2.79132	0.998839	0.109986	5.37733
GOTERM_BP_FAT	GO:0032483~regulation of Rab protein signal transduction	11	0.37415	0.0031887	CG4552, CG17883, CG16896, CG5978, CG5745, CG11490, CG12241, CG6182, CG5916, CG11727, CG4041	1203	26	7937	2.79132	0.998839	0.109986	5.37733
GOTERM_BP_FAT	GO:0032318~regulation of Ras GTPase activity	13	0.442177	0.00390173	CG4552, CG6182, CG11727, CG30372, CG4041, CENB1A, CG16896, CG5978, CG17883, CG5745, CG11490, CG12241, CG5916	1203	35	7937	2.45056	0.999744	0.124905	6.5419
GOTERM_BP_FAT	GO:0043087~regulation of GTPase activity	14	0.47619	0.00458686	CG4552, CG6182, CG31935, CG11727, CG30372, CG4041, CENB1A, CG17883, CG16896, CG5978, CG5745, CG11490, CG12241, CG5916	1203	40	7937	2.30919	0.99994	0.143083	7.64816
GOTERM_BP_FAT	GO:0051056~regulation of small GTPase mediated signal transduction	25	0.85034	0.00577141	ALPH, CG33275, CG11727, CENB1A, CG16896, CG4853, CG5745, CDEP, CG12241, CG4552, CG5521, AKAP200, CG6182, CG10188, CG1657, CG34408, CG30372, CG4041, CG31158, CG5978, CG17883, CG11490, CG15611, CG5916, C3G	1203	94	7937	1.7547	0.999995	0.167066	9.53178
GOTERM_MF_FAT	GO:0005097~Rab GTPase activator activity	12	0.408163	0.0137431	CG4552, CG17883, CG16896, CG5978, CG5745, CG11490, CG12241, CG6182, CG31935, CG5916, CG11727, CG4041	1510	29	7918	2.16981	1	0.377819	19.7759
GOTERM_BP_FAT	GO:0046578~regulation of Ras protein signal transduction	20	0.680272	0.0244046	CG4552, AKAP200, ALPH, CG33275, CG6182, CG10188, CG11727, CG30372, CG4041, CG31158, CENB1A, CG17883, CG5978, CG16896, CG5745, CDEP, CG11490, CG15611, CG12241, CG5916	1203	79	7937	1.6703	1	0.416655	34.7924
GOTERM_MF_FAT	GO:0008047~enzyme activator activity	25	0.85034	0.053235	CG1332, 14-3-3ZETA, CG31935, CG11727, CDC37, CENB1A, CG16896, CG5745, CG12241, CG4552, CG5521, CG6182, CG1657, ARK, CG34408, CG30372, CG4041, CG14722, CG5978, CG17883, CG6734, CG11490, CG5916, CDGAPR, CG1416	1510	91	7918	1.44058	1	0.687457	58.1485
GOTERM_BP_FAT	GO:0051336~regulation of hydrolase activity	16	0.544218	0.109257	CG4552, CG6182, CG31935, CG11727, CG30372, ARK, CG4041, CENB1A, CG17883, CG16896, CG5978, CG5745, CG11490, CG12241, CG5916, ACF1	1203	71	7937	1.4868	1	0.843499	86.4981
GOTERM_MF_FAT	GO:0060589~nucleoside-triphosphatase regulator activity	33	1.12245	0.202706	CG33275, CG31935, CG11727, CG4030, CENB1A, CG16896, CG4853, CG5745, CDEP, CG12241, CG14782, CG4552, CG5521, CG5522, CG33288, CG6182, CG10188, CG1657, CG34408, CG30372, CG4041, CG31158, CG17883, CG5978, CG11376, CG11490, CG15611, BJ1, CG5916, C3G, CDGAPR, CG1418, CG1416	1510	145	7918	1.1934	1	0.95071	97.2867
GOTERM_MF_FAT	GO:0005096~GTPase activator activity	18	0.612245	0.215628	CG4552, CG5521, CG6182, CG31935, CG11727, CG1657, CG30372, CG34408, CG4041, CENB1A, CG17883, CG5978, CG16896, CG5745, CG11490, CG12241, CG5916, CDGAPR	1510	73	7918	1.29297	1	0.957081	97.9083
GOTERM_MF_FAT	GO:0030695~GTPase regulator activity	32	1.08844	0.226357	CG33275, CG31935, CG11727, CG4030, CENB1A, CG16896, CG4853, CG5745, CDEP, CG12241, CG14782, CG4552, CG5521, CG5522, CG33288, CG6182, CG10188, CG1657, CG34408, CG30372, CG4041, CG31158, CG17883, CG5978, CG11376, CG11490, CG15611, BJ1, CG5916, C3G, CDGAPR, CG1418	1510	142	7918	1.18168	1	0.961139	98.3202
GOTERM_MF_FAT	GO:0005083~small GTPase regulator activity	25	0.85034	0.232196	CG33275, CG31935, CG11727, CG4030, CENB1A, CG16896, CG4853, CG5745, CDEP, CG12241, CG4552, CG6182, CG10188, CG1657, CG30372, CG4041, CG31158, CG5978, CG17883, CG11490, CG15611, BJ1, CG5916, C3G, CG1418	1510	108	7918	1.21382	1	0.963276	98.5111
GOTERM_MF_FAT	GO:0005099~Ras GTPase activator activity	12	0.408163	0.249999	CG4552, CG17883, CG16896, CG5978, CG5745, CG11490, CG12241, CG6182, CG31935, CG5916, CG11727, CG4041	1510	46	7918	1.36792	1	0.966554	98.9752
Annotation Cluster 20	Enrichment Score: 1.3497791222269548
Category	Term	Count	%	PValue	Genes	List Total	Pop Hits	Pop Total	Fold Enrichment	Bonferroni	Benjamini	FDR
GOTERM_MF_FAT	GO:0016879~ligase activity, forming carbon-nitrogen bonds	40	1.36054	0.00680568	CG31108, CG11070, CG16833, BRUCE, CG2218, CG17273, CDC16, CG5823, CG40045, CG5463, AGO, CG1550, CG3356, CG4238, CG4502, CG5112, ADE3, CG4089, ADE2, CG17486, CG5087, CG10254, CG34424, AS, CDC23, CG2924, CG15141, BUR, CBX, CG5191, CG2543, CG12084, CG5604, CG3964, CG3099, ARI-1, ARI-2, CG13343, ASPARAGINE-SYNTHETASE, BEN	1510	140	7918	1.4982	0.999296	0.221445	10.3032
GOTERM_MF_FAT	GO:0016881~acid-amino acid ligase activity	30	1.02041	0.0554973	CG31108, CG11070, CG16833, BRUCE, CG2218, CDC16, CG5823, CG40045, AGO, CG1550, CG3356, CG4238, CG4502, CG4089, CG5087, CG10254, AS, CDC23, CG2924, CG15141, CBX, CG2543, CG12084, CG5604, CG3964, ARI-1, CG3099, ARI-2, BEN, CG13343	1510	114	7918	1.37992	1	0.68876	59.7128
GOTERM_MF_FAT	GO:0019787~small conjugating protein ligase activity	24	0.816327	0.0701342	CG10254, AS, CG11070, BRUCE, CDC23, CG2924, CG2218, CDC16, CG5823, CG15141, CG40045, AGO, CBX, CG3356, CG4238, CG4502, CG12084, CG5604, ARI-1, CG3099, ARI-2, CG13343, BEN, CG5087	1510	89	7918	1.41403	1	0.748494	68.583
GOTERM_MF_FAT	GO:0004842~ubiquitin-protein ligase activity	21	0.714286	0.150595	CG10254, AS, CG11070, BRUCE, CDC23, CG2924, CG2218, CDC16, CG5823, CG15141, AGO, CG3356, CG4238, CG4502, CG12084, CG5604, ARI-1, CG3099, ARI-2, BEN, CG5087	1510	83	7918	1.32672	1	0.91316	92.5644
Annotation Cluster 21	Enrichment Score: 1.3353393073657427
Category	Term	Count	%	PValue	Genes	List Total	Pop Hits	Pop Total	Fold Enrichment	Bonferroni	Benjamini	FDR
GOTERM_BP_FAT	GO:0046394~carboxylic acid biosynthetic process	18	0.612245	0.0124323	CG10602, CG1998, CG10932, CG31522, CG6287, CG31523, CG11899, CG12264, CG11198, CG12173, CG16935, CG3011, CG1753, CG32068, CG30502, CG1673, ASPARAGINE-SYNTHETASE, CG17486	1203	64	7937	1.8556	1	0.267602	19.4673
GOTERM_BP_FAT	GO:0016053~organic acid biosynthetic process	18	0.612245	0.0124323	CG10602, CG1998, CG10932, CG31522, CG6287, CG31523, CG11899, CG12264, CG11198, CG12173, CG16935, CG3011, CG1753, CG32068, CG30502, CG1673, ASPARAGINE-SYNTHETASE, CG17486	1203	64	7937	1.8556	1	0.267602	19.4673
GOTERM_BP_FAT	GO:0008652~cellular amino acid biosynthetic process	10	0.340136	0.0234405	CG11899, CG12264, CG12173, CG1753, CG3011, CG32068, ASPARAGINE-SYNTHETASE, CG1673, CG6287, CG17486	1203	29	7937	2.27506	1	0.407153	33.6682
GOTERM_BP_FAT	GO:0009069~serine family amino acid metabolic process	7	0.238095	0.0244695	CG11899, CG3626, CG12264, CG6415, CG1753, CG3011, CG6287	1203	16	7937	2.88648	1	0.41428	34.8675
GOTERM_BP_FAT	GO:0006563~L-serine metabolic process	4	0.136054	0.0272775	CG11899, CG1753, CG3011, CG6287	1203	5	7937	5.27814	1	0.446294	38.037
GOTERM_BP_FAT	GO:0009067~aspartate family amino acid biosynthetic process	4	0.136054	0.0272775	CG12173, CG32068, ASPARAGINE-SYNTHETASE, CG17486	1203	5	7937	5.27814	1	0.446294	38.037
GOTERM_BP_FAT	GO:0009066~aspartate family amino acid metabolic process	6	0.204082	0.035336	CG12173, CG3267, CG32068, ASPARAGINE-SYNTHETASE, CG32281, CG17486	1203	13	7937	3.04508	1	0.509063	46.3455
GOTERM_BP_FAT	GO:0000096~sulfur amino acid metabolic process	6	0.204082	0.0482994	CG12264, CG12173, CG3267, CG1753, CG32068, CG32281	1203	14	7937	2.82757	1	0.614145	57.546
GOTERM_BP_FAT	GO:0009070~serine family amino acid biosynthetic process	4	0.136054	0.0754694	CG11899, CG1753, CG3011, CG6287	1203	7	7937	3.7701	1	0.743593	74.283
GOTERM_BP_FAT	GO:0006555~methionine metabolic process	4	0.136054	0.0754694	CG12173, CG3267, CG32068, CG32281	1203	7	7937	3.7701	1	0.743593	74.283
GOTERM_BP_FAT	GO:0006790~sulfur metabolic process	10	0.340136	0.0963252	CG12264, CG12173, BETA4GALT7, CG3267, CG1753, CG32068, CG12913, CG32281, BOTV, CG14721	1203	37	7937	1.78315	1	0.817491	82.6728
GOTERM_BP_FAT	GO:0006564~L-serine biosynthetic process	3	0.102041	0.111356	CG11899, CG3011, CG6287	1203	4	7937	4.94825	1	0.84499	87.0382
GOTERM_BP_FAT	GO:0009309~amine biosynthetic process	11	0.37415	0.164144	CG11899, CG12264, CG12173, CG1753, 14-3-3ZETA, CG3011, CG32068, ASPARAGINE-SYNTHETASE, CG1673, CG6287, CG17486	1203	47	7937	1.54414	1	0.921628	95.5086
GOTERM_BP_FAT	GO:0006633~fatty acid biosynthetic process	8	0.272109	0.178882	CG10602, CG11198, CG16935, CG1998, CG10932, CG31522, CG30502, CG31523	1203	31	7937	1.70263	1	0.934503	96.6988
Annotation Cluster 22	Enrichment Score: 1.2517541572086581
Category	Term	Count	%	PValue	Genes	List Total	Pop Hits	Pop Total	Fold Enrichment	Bonferroni	Benjamini	FDR
GOTERM_MF_FAT	GO:0003724~RNA helicase activity	17	0.578231	0.0163485	CG10777, ABS, CG32533, CG11107, CG10077, CG4901, CG6227, CG5205, CG6418, CG3225, CG5800, CG32344, CG11674, CG5931, CG5589, CG10333, BEL	1510	49	7918	1.81925	1	0.402712	23.0846
GOTERM_MF_FAT	GO:0004386~helicase activity	29	0.986395	0.0530239	CG32533, CG10777, CG10077, CG11107, CG4901, CG6227, CG5205, CG6418, CG5800, BGCN, CG4049, CG3335, CDC45L, CG11674, CG5924, CG5589, ABS, CG10445, CG3225, CG32344, CG11403, BRM, ARMI, CG5931, CG1582, CG5899, BEL, CG10333, CG4078	1510	109	7918	1.39512	1	0.693308	57.9996
GOTERM_MF_FAT	GO:0004004~ATP-dependent RNA helicase activity	13	0.442177	0.0643144	ABS, CG32533, CG11107, CG6227, CG4901, CG6418, CG3225, CG32344, CG11674, CG5931, CG5589, CG10333, BEL	1510	40	7918	1.70421	1	0.729798	65.3015
GOTERM_MF_FAT	GO:0008186~RNA-dependent ATPase activity	13	0.442177	0.0643144	ABS, CG32533, CG11107, CG6227, CG4901, CG6418, CG3225, CG32344, CG11674, CG5931, CG5589, CG10333, BEL	1510	40	7918	1.70421	1	0.729798	65.3015
GOTERM_MF_FAT	GO:0070035~purine NTP-dependent helicase activity	21	0.714286	0.0927801	CG32533, CG10777, ABS, CG10077, CG11107, CG4901, CG6227, CG5205, CG6418, CG3225, CG5800, CG32344, CG11403, CG11674, CG5931, CG1582, CG5899, CG5589, CG10333, BEL, CG4078	1510	78	7918	1.41177	1	0.821841	78.7837
GOTERM_MF_FAT	GO:0008026~ATP-dependent helicase activity	21	0.714286	0.0927801	CG32533, CG10777, ABS, CG10077, CG11107, CG4901, CG6227, CG5205, CG6418, CG3225, CG5800, CG32344, CG11403, CG11674, CG5931, CG1582, CG5899, CG5589, CG10333, BEL, CG4078	1510	78	7918	1.41177	1	0.821841	78.7837
Annotation Cluster 23	Enrichment Score: 1.2236210645553176
Category	Term	Count	%	PValue	Genes	List Total	Pop Hits	Pop Total	Fold Enrichment	Bonferroni	Benjamini	FDR
GOTERM_BP_FAT	GO:0032259~methylation	16	0.544218	0.0100798	CG14907, CG14906, ART1, ART4, ART3, AFT, CG1074, ART7, CG6379, CAF1, CG11447, CG5933, BIN3, ASH1, CG6133, CG14478, CG5220	1203	53	7937	1.99175	1	0.243009	16.082
GOTERM_MF_FAT	GO:0016273~arginine N-methyltransferase activity	6	0.204082	0.0268817	ART4, ART3, ART8, ART7, CG32152, ART1	1510	10	7918	3.14623	1	0.524186	35.2016
GOTERM_MF_FAT	GO:0016274~protein-arginine N-methyltransferase activity	6	0.204082	0.0268817	ART4, ART3, ART8, ART7, CG32152, ART1	1510	10	7918	3.14623	1	0.524186	35.2016
GOTERM_BP_FAT	GO:0006730~one-carbon metabolic process	19	0.646259	0.0322952	CG32698, CG14907, CG14906, ART1, ART4, ART3, AFT, ART7, CG1074, AHCY13, CG6379, CG3011, CAF1, CG11447, CG5933, BIN3, ASH1, CG6133, CG14478, CG5220	1203	76	7937	1.64942	1	0.490545	43.3421
GOTERM_BP_FAT	GO:0043414~biopolymer methylation	12	0.408163	0.0513042	ART4, ART3, ART7, CAF1, CG11447, CG5933, BIN3, ASH1, CG6133, CG14478, CG5220, ART1	1203	43	7937	1.84121	1	0.630289	59.807
GOTERM_BP_FAT	GO:0035246~peptidyl-arginine N-methylation	3	0.102041	0.0618241	ART4, ART7, ART1	1203	3	7937	6.59767	1	0.684682	66.8609
GOTERM_BP_FAT	GO:0035247~peptidyl-arginine omega-N-methylation	3	0.102041	0.0618241	ART4, ART7, ART1	1203	3	7937	6.59767	1	0.684682	66.8609
GOTERM_BP_FAT	GO:0019919~peptidyl-arginine methylation, to asymmetrical-dimethyl arginine	3	0.102041	0.0618241	ART4, ART7, ART1	1203	3	7937	6.59767	1	0.684682	66.8609
GOTERM_BP_FAT	GO:0018195~peptidyl-arginine modification	3	0.102041	0.111356	ART4, ART7, ART1	1203	4	7937	4.94825	1	0.84499	87.0382
GOTERM_BP_FAT	GO:0018216~peptidyl-arginine methylation	3	0.102041	0.111356	ART4, ART7, ART1	1203	4	7937	4.94825	1	0.84499	87.0382
GOTERM_BP_FAT	GO:0008213~protein amino acid alkylation	7	0.238095	0.2421	ART4, ART3, ART7, CAF1, BIN3, ASH1, ART1	1203	28	7937	1.64942	1	0.96762	99.1749
GOTERM_BP_FAT	GO:0006479~protein amino acid methylation	7	0.238095	0.2421	ART4, ART3, ART7, CAF1, BIN3, ASH1, ART1	1203	28	7937	1.64942	1	0.96762	99.1749
Annotation Cluster 24	Enrichment Score: 1.204500679436281
Category	Term	Count	%	PValue	Genes	List Total	Pop Hits	Pop Total	Fold Enrichment	Bonferroni	Benjamini	FDR
GOTERM_BP_FAT	GO:0043574~peroxisomal transport	3	0.102041	0.0618241	CG3639, CG4289, CG4663	1203	3	7937	6.59767	1	0.684682	66.8609
GOTERM_BP_FAT	GO:0006625~protein targeting to peroxisome	3	0.102041	0.0618241	CG3639, CG4289, CG4663	1203	3	7937	6.59767	1	0.684682	66.8609
GOTERM_BP_FAT	GO:0007031~peroxisome organization	6	0.204082	0.0637063	CG13827, CG12703, CG3947, CG3639, CG4289, CG4663	1203	15	7937	2.63907	1	0.692846	67.9929
Annotation Cluster 25	Enrichment Score: 1.1159026562192158
Category	Term	Count	%	PValue	Genes	List Total	Pop Hits	Pop Total	Fold Enrichment	Bonferroni	Benjamini	FDR
GOTERM_BP_FAT	GO:0034621~cellular macromolecular complex subunit organization	44	1.4966	0.0122178	CG30100, CG4901, CAM, CAPT, CANB2, CG5705, ASP, ALPHATUB84B, B52, BETATUB97EF, ALPHATUB84D, CG1890, CDC42, CG18591, BETATUB85D, CAF1-105, CG10419, CDM, CG13472, CAF1, AGO1, CG5037, AGO2, ACF1, CG4663, ARC-P20, CDC6, ALIX, CG6404, CG13349, CAF1-180, CG31648, CCHL, CG31961, ATL, CG3708, CG4942, ASF1, CG32164, CG13163, AUX, CG3803, BETATUB56D, CG6094	1203	203	7937	1.43004	1	0.269042	19.1641
GOTERM_BP_FAT	GO:0043623~cellular protein complex assembly	21	0.714286	0.0208852	ARC-P20, ALIX, CG6404, CG13349, CANB2, ALPHATUB84B, CG31648, CCHL, CG31961, BETATUB97EF, ALPHATUB84D, CG4942, CG1890, CDC42, BETATUB85D, CDM, CG32164, CG5037, CG3803, CG4663, BETATUB56D	1203	83	7937	1.66929	1	0.378188	30.5994
GOTERM_BP_FAT	GO:0034622~cellular macromolecular complex assembly	34	1.15646	0.053393	CANB2, ALPHATUB84B, B52, BETATUB97EF, ALPHATUB84D, CG1890, CG18591, CDC42, BETATUB85D, CAF1-105, CDM, CG10419, CG13472, AGO1, CAF1, CG5037, AGO2, ACF1, CG4663, ARC-P20, CDC6, ALIX, CG6404, CG13349, CAF1-180, CG31648, CCHL, CG31961, CG3708, CG4942, ASF1, CG32164, CG3803, BETATUB56D	1203	165	7937	1.35952	1	0.63886	61.3114
GOTERM_BP_FAT	GO:0043933~macromolecular complex subunit organization	52	1.76871	0.0912584	CAM, CG5705, ALPHATUB84B, CG10340, ALPHATUB84D, CAZ, CDC42, BETATUB85D, CG10419, CAF1, ACF1, CG4663, CDC6, ALIX, ARC-P20, CDK8, CAF1-180, CDK7, CG31961, CG13163, CG32164, AUX, BETATUB56D, CG30100, CG4901, CAPT, CANB2, ASP, B52, BETATUB97EF, CG1890, CG18591, CAF1-105, CDM, CG13472, CG4908, AGO1, CG5037, AGO2, CG5924, CG6404, ARC42, CG13349, CG31648, CCHL, ATL, CG3708, CG4942, ASF1, BRF, CG3803, CG…	1203	281	7937	1.22092	1	0.802085	80.9123
GOTERM_BP_FAT	GO:0065003~macromolecular complex assembly	43	1.46259	0.219115	CANB2, ALPHATUB84B, B52, CG10340, BETATUB97EF, ALPHATUB84D, CG1890, CAZ, CDC42, CG18591, BETATUB85D, CAF1-105, CG10419, CDM, CG13472, AGO1, CAF1, CG4908, CG5037, CG5924, AGO2, ACF1, CG4663, ARC-P20, CDC6, ALIX, ARC42, CG6404, CG13349, CDK8, CAF1-180, CG31648, CCHL, CDK7, CG31961, ATL, CG3708, CG4942, ASF1, CG32164, BRF, CG3803, BETATUB56D	1203	246	7937	1.15325	1	0.958072	98.6162
GOTERM_BP_FAT	GO:0070271~protein complex biogenesis	30	1.02041	0.238073	CANB2, ALPHATUB84B, CG10340, BETATUB97EF, ALPHATUB84D, CG1890, CDC42, CAZ, BETATUB85D, CDM, CG4908, CG5037, CG5924, CG4663, ALIX, ARC-P20, ARC42, CG6404, CG13349, CDK8, CG31648, CCHL, CDK7, CG31961, ATL, CG4942, CG32164, BRF, CG3803, BETATUB56D	1203	167	7937	1.18521	1	0.966102	99.0956
GOTERM_BP_FAT	GO:0006461~protein complex assembly	30	1.02041	0.238073	CANB2, ALPHATUB84B, CG10340, BETATUB97EF, ALPHATUB84D, CG1890, CDC42, CAZ, BETATUB85D, CDM, CG4908, CG5037, CG5924, CG4663, ALIX, ARC-P20, ARC42, CG6404, CG13349, CDK8, CG31648, CCHL, CDK7, CG31961, ATL, CG4942, CG32164, BRF, CG3803, BETATUB56D	1203	167	7937	1.18521	1	0.966102	99.0956
Annotation Cluster 26	Enrichment Score: 1.1104226152526537
Category	Term	Count	%	PValue	Genes	List Total	Pop Hits	Pop Total	Fold Enrichment	Bonferroni	Benjamini	FDR
GOTERM_MF_FAT	GO:0008318~protein prenyltransferase activity	5	0.170068	0.0281635	CG2976, CG17565, BETAGGT-II, BETAGGT-I, CG12007	1510	7	7918	3.74551	1	0.531953	36.5473
GOTERM_MF_FAT	GO:0004659~prenyltransferase activity	6	0.204082	0.0605535	CG2976, CG17565, BETAGGT-II, CG5037, BETAGGT-I, CG12007	1510	12	7918	2.62185	1	0.714303	63.013
GOTERM_MF_FAT	GO:0004661~protein geranylgeranyltransferase activity	4	0.136054	0.0875697	CG17565, BETAGGT-II, BETAGGT-I, CG12007	1510	6	7918	3.49581	1	0.808169	76.7582
GOTERM_MF_FAT	GO:0016765~transferase activity, transferring alkyl or aryl (other than methyl) groups	15	0.510204	0.242175	CG6673, CG11784, CG10778, CG2976, CG31005, CG17565, CG5224, BETAGGT-II, CG16936, CG31381, CG5037, BETAGGT-I, CG1681, CG12007, CG10585	1510	60	7918	1.31093	1	0.96623	98.791
Annotation Cluster 27	Enrichment Score: 1.103055822031607
Category	Term	Count	%	PValue	Genes	List Total	Pop Hits	Pop Total	Fold Enrichment	Bonferroni	Benjamini	FDR
GOTERM_BP_FAT	GO:0006643~membrane lipid metabolic process	9	0.306122	0.0159255	BWA, CG31414, BRN, CG12034, CG30502, ALPHA4GT1, CG33090, CG3376, CDASE	1203	23	7937	2.5817	1	0.317287	24.2576
GOTERM_BP_FAT	GO:0006665~sphingolipid metabolic process	8	0.272109	0.0228803	BWA, CG31414, BRN, CG12034, CG30502, CG33090, CG3376, CDASE	1203	20	7937	2.63907	1	0.402827	33.0065
GOTERM_MF_FAT	GO:0017040~ceramidase activity	4	0.136054	0.0508837	BWA, CG31414, CG33090, CDASE	1510	5	7918	4.19497	1	0.685428	56.4625
GOTERM_BP_FAT	GO:0046521~sphingoid catabolic process	3	0.102041	0.0618241	BWA, CG33090, CDASE	1203	3	7937	6.59767	1	0.684682	66.8609
GOTERM_BP_FAT	GO:0046514~ceramide catabolic process	3	0.102041	0.0618241	BWA, CG33090, CDASE	1203	3	7937	6.59767	1	0.684682	66.8609
GOTERM_BP_FAT	GO:0030149~sphingolipid catabolic process	4	0.136054	0.107545	BWA, CG33090, CG3376, CDASE	1203	8	7937	3.29884	1	0.843073	86.0418
GOTERM_BP_FAT	GO:0046466~membrane lipid catabolic process	4	0.136054	0.107545	BWA, CG33090, CG3376, CDASE	1203	8	7937	3.29884	1	0.843073	86.0418
GOTERM_BP_FAT	GO:0006672~ceramide metabolic process	3	0.102041	0.111356	BWA, CG33090, CDASE	1203	4	7937	4.94825	1	0.84499	87.0382
GOTERM_BP_FAT	GO:0046519~sphingoid metabolic process	3	0.102041	0.111356	BWA, CG33090, CDASE	1203	4	7937	4.94825	1	0.84499	87.0382
GOTERM_MF_FAT	GO:0016811~hydrolase activity, acting on carbon-nitrogen (but not peptide) bonds, in linear amides	9	0.306122	0.917042	BWA, CG31414, CG6428, CG5112, CG31278, CG1827, CG6726, CG33090, CDASE	1510	61	7918	0.773662	1	0.999999	100
Annotation Cluster 28	Enrichment Score: 1.044205702069082
Category	Term	Count	%	PValue	Genes	List Total	Pop Hits	Pop Total	Fold Enrichment	Bonferroni	Benjamini	FDR
GOTERM_MF_FAT	GO:0016779~nucleotidyltransferase activity	25	0.85034	0.0474508	CG10777, CG11107, CG18600, CG6227, CG5205, CG4644, CCT1, CG5800, CG17209, CG1129, CG12267, CG11337, CG4407, CG2100, CG12018, CDSA, CG3756, CG3225, CG5147, CG33649, CG33785, CG5380, CG13773, CG1239, CG34186	1510	90	7918	1.45659	1	0.674826	53.8862
GOTERM_BP_FAT	GO:0006383~transcription from RNA polymerase III promoter	5	0.170068	0.0713866	CG17209, CG5147, CG5380, CG12267, CG3756	1203	11	7937	2.99894	1	0.729091	72.2451
GOTERM_MF_FAT	GO:0034062~RNA polymerase activity	10	0.340136	0.140171	CG18600, CG17209, CG5147, CG33785, CG4644, CG5380, CG12267, CG13773, CG3756, CG34186	1510	32	7918	1.63866	1	0.908924	90.9706
GOTERM_MF_FAT	GO:0003899~DNA-directed RNA polymerase activity	10	0.340136	0.140171	CG18600, CG17209, CG5147, CG33785, CG4644, CG5380, CG12267, CG13773, CG3756, CG34186	1510	32	7918	1.63866	1	0.908924	90.9706
Annotation Cluster 29	Enrichment Score: 1.0416047307278042
Category	Term	Count	%	PValue	Genes	List Total	Pop Hits	Pop Total	Fold Enrichment	Bonferroni	Benjamini	FDR
GOTERM_BP_FAT	GO:0044271~nitrogen compound biosynthetic process	59	2.0068	5.49484e-05	CG3434, 14-3-3ZETA, ATPSYN-GAMMA, CG17273, ATPSYN-BETA, CG11255, ALAS, CA-P60A, CG1673, ADE3, ATP7, ADY43A, ADE2, ATPSYN-D, ATPSYN-B, AC13E, CG6287, ATPSYN-CF6, CG2543, CG3321, CG3011, CG32068, CG2246, CG4966, ADK2, ADK3, CG5757, BW, CG32000, CG3216, CG3156, BLW, CG33298, CG15547, ADA, AWD, CG31729, CG12264, CG32626, CG12173, CG1753, CG3714, CG5037, CG6230, CG17486, CG3590, CG14434, ATPALPHA, CG2…	1203	233	7937	1.67066	0.109769	0.00464016	0.0950533
GOTERM_BP_FAT	GO:0006119~oxidative phosphorylation	36	1.22449	0.000463643	CG11015, CG4769, CG10320, CG3192, CG1970, CG5703, CG3560, ATPSYN-GAMMA, CG4169, CG3214, BLW, CG18624, ATPSYN-BETA, CG3683, CG6020, CG32649, CG14482, CG11455, CG3621, CG3731, ATPSYN-D, CG12859, ATPSYN-B, CG5548, CG12140, CG6463, ATPSYN-CF6, CG10664, CG1746, CG12895, CG12400, CG18809, CG3321, CG2249, CG11043, CG3446	1203	132	7937	1.79937	0.625175	0.0215706	0.799373
GOTERM_BP_FAT	GO:0034404~nucleobase, nucleoside and nucleotide biosynthetic process	38	1.29252	0.0036933	CG32000, CG3216, CG3434, ATPSYN-GAMMA, CG15547, CG33298, CG17273, BLW, ATPSYN-BETA, ADA, CG11255, AWD, CG31729, CG32626, CG3714, CA-P60A, CG6230, ADY43A, ATP7, ADE3, ADE2, CG3590, ATPSYN-D, CG14434, ATPSYN-B, ATPALPHA, AC13E, ATPSYN-CF6, BUR, APRT, CG42321, CG1746, CG3321, CG4966, CG2246, ADK2, ADK3, CG5757	1203	158	7937	1.58678	0.999602	0.120456	6.20287
GOTERM_BP_FAT	GO:0034654~nucleobase, nucleoside, nucleotide and nucleic acid biosynthetic process	38	1.29252	0.0036933	CG32000, CG3216, CG3434, ATPSYN-GAMMA, CG15547, CG33298, CG17273, BLW, ATPSYN-BETA, ADA, CG11255, AWD, CG31729, CG32626, CG3714, CA-P60A, CG6230, ADY43A, ATP7, ADE3, ADE2, CG3590, ATPSYN-D, CG14434, ATPSYN-B, ATPALPHA, AC13E, ATPSYN-CF6, BUR, APRT, CG42321, CG1746, CG3321, CG4966, CG2246, ADK2, ADK3, CG5757	1203	158	7937	1.58678	0.999602	0.120456	6.20287
GOTERM_BP_FAT	GO:0009150~purine ribonucleotide metabolic process	27	0.918367	0.00832219	CG32000, ATPSYN-GAMMA, CG15547, CG33298, BLW, ATPSYN-BETA, ADA, AWD, CG31729, CG32626, CA-P60A, CG6230, ADE3, ATP7, ADE2, CG3590, ATPSYN-D, ATPSYN-B, ATPALPHA, ATPSYN-CF6, BUR, CG42321, CG1746, CG3321, ADK2, ADK3, CG3326	1203	107	7937	1.66483	1	0.220469	13.4657
GOTERM_BP_FAT	GO:0009152~purine ribonucleotide biosynthetic process	26	0.884354	0.00852749	CG32000, ATPSYN-GAMMA, CG15547, CG33298, BLW, ATPSYN-BETA, ADA, AWD, CG31729, CG32626, CA-P60A, CG6230, ADE3, ATP7, ADE2, CG3590, ATPSYN-D, ATPSYN-B, ATPALPHA, ATPSYN-CF6, BUR, CG42321, CG1746, CG3321, ADK2, ADK3	1203	102	7937	1.68176	1	0.222513	13.7753
GOTERM_BP_FAT	GO:0006163~purine nucleotide metabolic process	31	1.05442	0.0103874	CG32000, ATPSYN-GAMMA, CG15547, CG33298, CG17273, BLW, ATPSYN-BETA, ADA, AWD, CG31729, CG32626, CA-P60A, CG6230, ADE3, ATP7, ADE2, CG3590, CG11811, ATPSYN-D, CG14434, ATPSYN-B, ATPALPHA, AC13E, ATPSYN-CF6, BUR, CG42321, CG1746, CG3321, ADK2, ADK3, CG3326	1203	130	7937	1.57329	1	0.243973	16.5321
GOTERM_BP_FAT	GO:0009259~ribonucleotide metabolic process	27	0.918367	0.015107	CG32000, ATPSYN-GAMMA, CG15547, CG33298, BLW, ATPSYN-BETA, ADA, AWD, CG31729, CG32626, CA-P60A, CG6230, ADE3, ATP7, ADE2, CG3590, ATPSYN-D, ATPSYN-B, ATPALPHA, ATPSYN-CF6, BUR, CG42321, CG1746, CG3321, ADK2, ADK3, CG3326	1203	112	7937	1.59051	1	0.309428	23.1599
GOTERM_MF_FAT	GO:0042624~ATPase activity, uncoupled	50	1.70068	0.0156097	CG4562, CG12010, CG6512, CG6418, CG5800, CCTGAMMA, CG11674, CG5789, CG33087, CG15831, CG5589, C12.2, CG2658, CG5853, CG34120, CG3225, CG32344, CG11403, CG1824, CG31731, CG5899, CG10777, CG32533, CG11107, CG10077, CG32000, CG4901, CG6227, CG12703, CG5205, CG11170, CG2316, CG3156, CG3973, CG3164, CG4908, CG32104, CG32091, CG33970, CG4538, CG31793, CG1801, CCT5, BTV, CG5776, CG1582, CG1703, CG11147,…	1510	192	7918	1.36555	1	0.397572	22.1595
GOTERM_BP_FAT	GO:0009260~ribonucleotide biosynthetic process	26	0.884354	0.0156777	CG32000, ATPSYN-GAMMA, CG15547, CG33298, BLW, ATPSYN-BETA, ADA, AWD, CG31729, CG32626, CA-P60A, CG6230, ADE3, ATP7, ADE2, CG3590, ATPSYN-D, ATPSYN-B, ATPALPHA, ATPSYN-CF6, BUR, CG42321, CG1746, CG3321, ADK2, ADK3	1203	107	7937	1.60317	1	0.316113	23.9267
GOTERM_BP_FAT	GO:0009165~nucleotide biosynthetic process	34	1.15646	0.0167661	CG32000, CG3216, ATPSYN-GAMMA, CG15547, CG33298, CG17273, BLW, ATPSYN-BETA, ADA, AWD, CG31729, CG32626, CG3714, CA-P60A, CG6230, ATP7, ADE3, ADE2, CG3590, ATPSYN-D, CG14434, ATPSYN-B, ATPALPHA, AC13E, ATPSYN-CF6, BUR, CG42321, CG1746, CG3321, CG4966, CG2246, ADK2, ADK3, CG5757	1203	151	7937	1.48557	1	0.325081	25.3694
GOTERM_BP_FAT	GO:0006164~purine nucleotide biosynthetic process	29	0.986395	0.0191733	CG32000, ATPSYN-GAMMA, CG15547, CG33298, CG17273, BLW, ATPSYN-BETA, ADA, AWD, CG31729, CG32626, CA-P60A, CG6230, ADE3, ATP7, ADE2, CG3590, ATPSYN-D, ATPSYN-B, CG14434, ATPALPHA, AC13E, ATPSYN-CF6, BUR, CG42321, CG1746, CG3321, ADK2, ADK3	1203	125	7937	1.53066	1	0.356273	28.4693
GOTERM_MF_FAT	GO:0043492~ATPase activity, coupled to movement of substances	36	1.22449	0.0327295	BW, CG4562, CG32000, CG12703, CG2316, ATPSYN-GAMMA, CG3156, CG33298, BLW, ATPSYN-BETA, CG31729, CA-P60A, CG3164, CG5789, CG6230, ATP7, CG32091, CG1598, CG33970, ATPSYN-D, CG5853, ATPSYN-B, ATPALPHA, CG34120, CG31793, ATPSYN-CF6, CG1801, CG42321, CG1746, CG1824, CG3321, CG11897, CG31731, CG11779, CG1703, CG11147	1510	136	7918	1.38804	1	0.56925	41.1314
GOTERM_MF_FAT	GO:0042626~ATPase activity, coupled to transmembrane movement of substances	36	1.22449	0.0327295	BW, CG4562, CG32000, CG12703, CG2316, ATPSYN-GAMMA, CG3156, CG33298, BLW, ATPSYN-BETA, CG31729, CA-P60A, CG3164, CG5789, CG6230, ATP7, CG32091, CG1598, CG33970, ATPSYN-D, CG5853, ATPSYN-B, ATPALPHA, CG34120, CG31793, ATPSYN-CF6, CG1801, CG42321, CG1746, CG1824, CG3321, CG11897, CG31731, CG11779, CG1703, CG11147	1510	136	7918	1.38804	1	0.56925	41.1314
GOTERM_MF_FAT	GO:0016820~hydrolase activity, acting on acid anhydrides, catalyzing transmembrane movement of substances	36	1.22449	0.0398881	BW, CG4562, CG32000, CG12703, CG2316, ATPSYN-GAMMA, CG3156, CG33298, BLW, ATPSYN-BETA, CG31729, CA-P60A, CG3164, CG5789, CG6230, ATP7, CG32091, CG1598, CG33970, ATPSYN-D, CG5853, ATPSYN-B, ATPALPHA, CG34120, CG31793, ATPSYN-CF6, CG1801, CG42321, CG1746, CG1824, CG3321, CG11897, CG31731, CG11779, CG1703, CG11147	1510	138	7918	1.36792	1	0.617701	47.6983
GOTERM_MF_FAT	GO:0016887~ATPase activity	79	2.68707	0.0798935	CG4562, CG12010, ATPSYN-GAMMA, CG6512, CG6418, ATPSYN-BETA, CG5800, CCTGAMMA, CG11674, CA-P60A, CG33087, CG5789, CG15831, ATP7, CG5589, C12.2, CDC6, ATPSYN-D, CG2658, CG5853, CG5525, ATPSYN-B, CG34120, CG3225, ATPSYN-CF6, CG32344, CG11403, CG1824, CG3321, CG31731, CG11779, CG5899, CG3326, CG32533, CG10777, BW, CG32000, CG10077, CG11107, CG6227, CG4901, CG12703, CG5205, CG11170, CG2316, CG3156, CG…	1510	353	7918	1.17352	1	0.788353	73.4415
GOTERM_BP_FAT	GO:0009205~purine ribonucleoside triphosphate metabolic process	19	0.646259	0.0999397	CG32000, ATPSYN-D, ATPSYN-B, ATPSYN-GAMMA, ATPALPHA, CG15547, BLW, CG33298, ATPSYN-BETA, ATPSYN-CF6, CG42321, AWD, CG31729, CG1746, CG3321, CA-P60A, CG6230, ATP7, CG3326	1203	87	7937	1.44087	1	0.826978	83.8338
GOTERM_BP_FAT	GO:0009144~purine nucleoside triphosphate metabolic process	19	0.646259	0.0999397	CG32000, ATPSYN-D, ATPSYN-B, ATPSYN-GAMMA, ATPALPHA, CG15547, BLW, CG33298, ATPSYN-BETA, ATPSYN-CF6, CG42321, AWD, CG31729, CG1746, CG3321, CA-P60A, CG6230, ATP7, CG3326	1203	87	7937	1.44087	1	0.826978	83.8338
GOTERM_BP_FAT	GO:0009206~purine ribonucleoside triphosphate biosynthetic process	18	0.612245	0.106074	CG32000, ATPSYN-D, ATPSYN-B, ATPSYN-GAMMA, ATPALPHA, CG15547, BLW, CG33298, ATPSYN-BETA, ATPSYN-CF6, CG42321, AWD, CG31729, CG1746, CG3321, CA-P60A, CG6230, ATP7	1203	82	7937	1.44827	1	0.841075	85.6384
GOTERM_BP_FAT	GO:0009145~purine nucleoside triphosphate biosynthetic process	18	0.612245	0.106074	CG32000, ATPSYN-D, ATPSYN-B, ATPSYN-GAMMA, ATPALPHA, CG15547, BLW, CG33298, ATPSYN-BETA, ATPSYN-CF6, CG42321, AWD, CG31729, CG1746, CG3321, CA-P60A, CG6230, ATP7	1203	82	7937	1.44827	1	0.841075	85.6384
GOTERM_BP_FAT	GO:0009199~ribonucleoside triphosphate metabolic process	19	0.646259	0.108748	CG32000, ATPSYN-D, ATPSYN-B, ATPSYN-GAMMA, ATPALPHA, CG15547, BLW, CG33298, ATPSYN-BETA, ATPSYN-CF6, CG42321, AWD, CG31729, CG1746, CG3321, CA-P60A, CG6230, ATP7, CG3326	1203	88	7937	1.4245	1	0.84427	86.364
GOTERM_BP_FAT	GO:0009201~ribonucleoside triphosphate biosynthetic process	18	0.612245	0.115546	CG32000, ATPSYN-D, ATPSYN-B, ATPSYN-GAMMA, ATPALPHA, CG15547, BLW, CG33298, ATPSYN-BETA, ATPSYN-CF6, CG42321, AWD, CG31729, CG1746, CG3321, CA-P60A, CG6230, ATP7	1203	83	7937	1.43082	1	0.854057	88.0562
GOTERM_BP_FAT	GO:0009142~nucleoside triphosphate biosynthetic process	18	0.612245	0.115546	CG32000, ATPSYN-D, ATPSYN-B, ATPSYN-GAMMA, ATPALPHA, CG15547, BLW, CG33298, ATPSYN-BETA, ATPSYN-CF6, CG42321, AWD, CG31729, CG1746, CG3321, CA-P60A, CG6230, ATP7	1203	83	7937	1.43082	1	0.854057	88.0562
GOTERM_BP_FAT	GO:0009141~nucleoside triphosphate metabolic process	19	0.646259	0.118019	CG32000, ATPSYN-D, ATPSYN-B, ATPSYN-GAMMA, ATPALPHA, CG15547, BLW, CG33298, ATPSYN-BETA, ATPSYN-CF6, CG42321, AWD, CG31729, CG1746, CG3321, CA-P60A, CG6230, ATP7, CG3326	1203	89	7937	1.40849	1	0.858288	88.6213
GOTERM_MF_FAT	GO:0015399~primary active transmembrane transporter activity	37	1.2585	0.127148	BW, CG4562, CG32000, CG12703, CG2316, ATPSYN-GAMMA, CG31229, CG3156, BLW, CG33298, ATPSYN-BETA, CG31729, CA-P60A, CG3164, CG5789, CG6230, ATP7, CG32091, CG1598, CG33970, ATPSYN-D, CG5853, ATPSYN-B, ATPALPHA, CG34120, CG31793, ATPSYN-CF6, CG1801, CG42321, CG1746, CG1824, CG3321, CG11897, CG31731, CG11779, CG1703, CG11147	1510	157	7918	1.23578	1	0.895513	88.5286
GOTERM_MF_FAT	GO:0015405~P-P-bond-hydrolysis-driven transmembrane transporter activity	37	1.2585	0.127148	BW, CG4562, CG32000, CG12703, CG2316, ATPSYN-GAMMA, CG31229, CG3156, BLW, CG33298, ATPSYN-BETA, CG31729, CA-P60A, CG3164, CG5789, CG6230, ATP7, CG32091, CG1598, CG33970, ATPSYN-D, CG5853, ATPSYN-B, ATPALPHA, CG34120, CG31793, ATPSYN-CF6, CG1801, CG42321, CG1746, CG1824, CG3321, CG11897, CG31731, CG11779, CG1703, CG11147	1510	157	7918	1.23578	1	0.895513	88.5286
GOTERM_BP_FAT	GO:0046034~ATP metabolic process	17	0.578231	0.144819	CG32000, ATPSYN-D, ATPSYN-B, ATPSYN-GAMMA, ATPALPHA, BLW, CG33298, ATPSYN-BETA, ATPSYN-CF6, CG42321, CG31729, CG1746, CG3321, CA-P60A, CG6230, ATP7, CG3326	1203	80	7937	1.40201	1	0.89802	93.3293
GOTERM_MF_FAT	GO:0042623~ATPase activity, coupled	66	2.2449	0.186388	CG4562, ATPSYN-GAMMA, CG6418, ATPSYN-BETA, CG5800, CCTGAMMA, CG11674, CA-P60A, CG5789, CG15831, ATP7, CG5589, CDC6, ATPSYN-D, CG5853, CG5525, ATPSYN-B, CG34120, CG3225, ATPSYN-CF6, CG32344, CG11403, CG1824, CG3321, CG31731, CG11779, CG5899, CG32533, CG10777, BW, CG32000, CG10077, CG11107, CG6227, CG4901, CG12703, CG5205, CG2316, CG3156, BLW, CG33298, CG3499, CG31729, CG3164, CG6230, CG32091, CG15…	1510	307	7918	1.12731	1	0.942018	96.2537
GOTERM_BP_FAT	GO:0006754~ATP biosynthetic process	16	0.544218	0.193867	CG32000, ATPSYN-D, ATPSYN-B, ATPSYN-GAMMA, ATPALPHA, BLW, CG33298, ATPSYN-BETA, ATPSYN-CF6, CG42321, CG31729, CG1746, CG3321, CA-P60A, CG6230, ATP7	1203	78	7937	1.35337	1	0.944209	97.5998
GOTERM_MF_FAT	GO:0022890~inorganic cation transmembrane transporter activity	28	0.952381	0.310276	CG11015, CG14235, ATPSYN-GAMMA, CG3560, CG4169, BLW, ATPSYN-BETA, CG6672, CG14482, CG3790, CA-P60A, ATP7, CG3476, CG5130, CG3731, CG4630, ATPSYN-D, ATPSYN-B, ATPALPHA, CG14077, CG11163, ATPSYN-CF6, CG10664, CG1746, CG18809, CG2249, CG11043, CG3321	1510	128	7918	1.14706	1	0.982212	99.7301
GOTERM_BP_FAT	GO:0055085~transmembrane transport	20	0.680272	0.33246	BLP, CG33331, ATPSYN-D, ATPSYN-B, CG4607, ATPSYN-GAMMA, CG5857, CG31229, BLW, CG34132, ATPSYN-BETA, ATPSYN-CF6, CG14749, CG30035, CG1746, CG3321, CG10960, CG32669, CG3476, CG10420	1203	112	7937	1.17816	1	0.989164	99.9083
GOTERM_MF_FAT	GO:0042625~ATPase activity, coupled to transmembrane movement of ions	17	0.578231	0.437793	CG32000, ATPSYN-D, ATPSYN-B, ATPSYN-GAMMA, ATPALPHA, BLW, CG33298, ATPSYN-BETA, ATPSYN-CF6, CG42321, CG31729, CG1746, CG3321, CA-P60A, CG6230, ATP7, CG1598	1510	79	7918	1.12839	1	0.993912	99.9896
GOTERM_MF_FAT	GO:0015662~ATPase activity, coupled to transmembrane movement of ions, phosphorylative mechanism	16	0.544218	0.463754	CG32000, ATPSYN-D, ATPSYN-B, ATPSYN-GAMMA, ATPALPHA, BLW, CG33298, ATPSYN-BETA, ATPSYN-CF6, CG42321, CG31729, CG1746, CG3321, CA-P60A, CG6230, ATP7	1510	75	7918	1.11866	1	0.995214	99.9951
GOTERM_MF_FAT	GO:0015077~monovalent inorganic cation transmembrane transporter activity	20	0.680272	0.488042	CG11015, CG14235, CG3731, ATPSYN-D, ATPSYN-B, ATPSYN-GAMMA, ATPALPHA, CG3560, CG4169, BLW, ATPSYN-BETA, CG14077, ATPSYN-CF6, CG10664, CG1746, CG14482, CG18809, CG11043, CG2249, CG3321	1510	97	7918	1.08118	1	0.996316	99.9977
GOTERM_MF_FAT	GO:0015078~hydrogen ion transmembrane transporter activity	19	0.646259	0.552799	CG11015, CG14235, CG3731, ATPSYN-D, ATPSYN-B, ATPSYN-GAMMA, CG3560, CG4169, BLW, ATPSYN-BETA, CG14077, ATPSYN-CF6, CG10664, CG1746, CG14482, CG18809, CG11043, CG2249, CG3321	1510	95	7918	1.04874	1	0.99823	99.9997
GOTERM_BP_FAT	GO:0006812~cation transport	38	1.29252	0.609917	CG32000, CG32810, CG14647, CG11655, ATPSYN-GAMMA, BLW, ATPSYN-BETA, CG10006, CG6672, CG31729, CG34396, CG4334, CA-P60A, CCS, CG32669, CG6230, ATP7, CG13568, CG3476, CG5130, ATPSYN-D, CG10444, ATPSYN-B, ATPALPHA, CG42340, CG10465, CG2177, CG33181, CG11163, CATSUP, CG11739, CG13762, ATPSYN-CF6, CG16868, CG1746, CG3321, CG13189, CG15094	1203	252	7937	0.994887	1	0.999715	100
GOTERM_BP_FAT	GO:0015986~ATP synthesis coupled proton transport	8	0.272109	0.76449	CG1746, ATPSYN-D, CG3321, ATPSYN-B, ATPSYN-GAMMA, BLW, ATPSYN-BETA, ATPSYN-CF6	1203	56	7937	0.942525	1	0.999973	100
GOTERM_BP_FAT	GO:0015985~energy coupled proton transport, down electrochemical gradient	8	0.272109	0.76449	CG1746, ATPSYN-D, CG3321, ATPSYN-B, ATPSYN-GAMMA, BLW, ATPSYN-BETA, ATPSYN-CF6	1203	56	7937	0.942525	1	0.999973	100
GOTERM_BP_FAT	GO:0034220~ion transmembrane transport	8	0.272109	0.795941	CG1746, ATPSYN-D, CG3321, ATPSYN-B, ATPSYN-GAMMA, BLW, ATPSYN-BETA, ATPSYN-CF6	1203	58	7937	0.910024	1	0.999985	100
GOTERM_MF_FAT	GO:0019829~cation-transporting ATPase activity	5	0.170068	0.83093	ATPSYN-GAMMA, CA-P60A, BLW, ATPSYN-BETA, CG1598	1510	29	7918	0.904088	1	0.999981	100
GOTERM_BP_FAT	GO:0015992~proton transport	8	0.272109	0.860513	CG1746, ATPSYN-D, CG3321, ATPSYN-B, ATPSYN-GAMMA, BLW, ATPSYN-BETA, ATPSYN-CF6	1203	63	7937	0.8378	1	0.999996	100
GOTERM_BP_FAT	GO:0006818~hydrogen transport	8	0.272109	0.871192	CG1746, ATPSYN-D, CG3321, ATPSYN-B, ATPSYN-GAMMA, BLW, ATPSYN-BETA, ATPSYN-CF6	1203	64	7937	0.824709	1	0.999998	100
GOTERM_MF_FAT	GO:0008553~hydrogen-exporting ATPase activity, phosphorylative mechanism	8	0.272109	0.87857	CG1746, ATPSYN-D, CG3321, ATPSYN-B, ATPSYN-GAMMA, BLW, ATPSYN-BETA, ATPSYN-CF6	1510	51	7918	0.822543	1	0.999996	100
GOTERM_MF_FAT	GO:0046933~hydrogen ion transporting ATP synthase activity, rotational mechanism	3	0.102041	0.883782	ATPSYN-GAMMA, BLW, ATPSYN-BETA	1510	18	7918	0.873951	1	0.999996	100
GOTERM_MF_FAT	GO:0046961~proton-transporting ATPase activity, rotational mechanism	3	0.102041	0.950657	ATPSYN-GAMMA, BLW, ATPSYN-BETA	1510	23	7918	0.683962	1	1	100
GOTERM_BP_FAT	GO:0015672~monovalent inorganic cation transport	19	0.646259	0.977103	CG32810, CG14647, CG10444, ATPSYN-D, ATPSYN-B, ATPSYN-GAMMA, ATPALPHA, CG11655, CG10465, CG42340, BLW, ATPSYN-BETA, ATPSYN-CF6, CG1746, CG3321, CG34396, CG32669, CG13568, CG15094	1203	175	7937	0.716319	1	1	100
Annotation Cluster 30	Enrichment Score: 1.0248946823948641
Category	Term	Count	%	PValue	Genes	List Total	Pop Hits	Pop Total	Fold Enrichment	Bonferroni	Benjamini	FDR
GOTERM_BP_FAT	GO:0009116~nucleoside metabolic process	12	0.408163	0.0115984	CG3788, AWD, CG6330, CG3434, CG31115, CG15547, CG2246, CG16758, ADY43A, CG4802, APRT, CG11255	1203	35	7937	2.26206	1	0.262701	18.2824
GOTERM_BP_FAT	GO:0043094~cellular metabolic compound salvage	5	0.170068	0.0124876	CG12173, CG32068, ADY43A, APRT, CG11255	1203	7	7937	4.71262	1	0.265958	19.5454
GOTERM_BP_FAT	GO:0009163~nucleoside biosynthetic process	4	0.136054	0.0754694	CG3434, ADY43A, APRT, CG11255	1203	7	7937	3.7701	1	0.743593	74.283
GOTERM_BP_FAT	GO:0042455~ribonucleoside biosynthetic process	4	0.136054	0.0754694	CG3434, ADY43A, APRT, CG11255	1203	7	7937	3.7701	1	0.743593	74.283
GOTERM_BP_FAT	GO:0046129~purine ribonucleoside biosynthetic process	4	0.136054	0.0754694	CG3434, ADY43A, APRT, CG11255	1203	7	7937	3.7701	1	0.743593	74.283
GOTERM_BP_FAT	GO:0042451~purine nucleoside biosynthetic process	4	0.136054	0.0754694	CG3434, ADY43A, APRT, CG11255	1203	7	7937	3.7701	1	0.743593	74.283
GOTERM_BP_FAT	GO:0043101~purine salvage	3	0.102041	0.167408	ADY43A, APRT, CG11255	1203	5	7937	3.9586	1	0.923264	95.8027
GOTERM_BP_FAT	GO:0043174~nucleoside salvage	3	0.102041	0.167408	ADY43A, APRT, CG11255	1203	5	7937	3.9586	1	0.923264	95.8027
GOTERM_BP_FAT	GO:0006166~purine ribonucleoside salvage	3	0.102041	0.167408	ADY43A, APRT, CG11255	1203	5	7937	3.9586	1	0.923264	95.8027
GOTERM_BP_FAT	GO:0009119~ribonucleoside metabolic process	6	0.204082	0.232034	AWD, CG3434, CG15547, ADY43A, APRT, CG11255	1203	22	7937	1.79937	1	0.963322	98.9632
GOTERM_BP_FAT	GO:0042278~purine nucleoside metabolic process	4	0.136054	0.313481	CG3434, ADY43A, APRT, CG11255	1203	13	7937	2.03005	1	0.986772	99.851
GOTERM_BP_FAT	GO:0046128~purine ribonucleoside metabolic process	4	0.136054	0.313481	CG3434, ADY43A, APRT, CG11255	1203	13	7937	2.03005	1	0.986772	99.851
Annotation Cluster 31	Enrichment Score: 1.0248143785180812
Category	Term	Count	%	PValue	Genes	List Total	Pop Hits	Pop Total	Fold Enrichment	Bonferroni	Benjamini	FDR
GOTERM_MF_FAT	GO:0016885~ligase activity, forming carbon-carbon bonds	4	0.136054	0.0508837	CG11198, CG1516, CG3267, CG2118	1510	5	7918	4.19497	1	0.685428	56.4625
GOTERM_MF_FAT	GO:0009374~biotin binding	3	0.102041	0.0950806	CG11198, CG1516, CG2118	1510	3	7918	5.24371	1	0.824663	79.6243
GOTERM_MF_FAT	GO:0033293~monocarboxylic acid binding	6	0.204082	0.174135	CG11198, CG1516, CG33713, CG14232, CG17896, CG2118	1510	16	7918	1.96639	1	0.933576	95.247
Annotation Cluster 32	Enrichment Score: 0.9515505800459482
Category	Term	Count	%	PValue	Genes	List Total	Pop Hits	Pop Total	Fold Enrichment	Bonferroni	Benjamini	FDR
GOTERM_MF_FAT	GO:0004549~tRNA-specific ribonuclease activity	5	0.170068	0.0479543	CG33932, CG33260, CG5626, CG14057, CG31812	1510	8	7918	3.27732	1	0.670919	54.2729
GOTERM_BP_FAT	GO:0006388~tRNA splicing, via endonucleolytic cleavage and ligation	4	0.136054	0.0754694	CG33260, CG5626, CG33057, CG31812	1203	7	7937	3.7701	1	0.743593	74.283
GOTERM_BP_FAT	GO:0000394~RNA splicing, via endonucleolytic cleavage and ligation	4	0.136054	0.0754694	CG33260, CG5626, CG33057, CG31812	1203	7	7937	3.7701	1	0.743593	74.283
GOTERM_MF_FAT	GO:0000213~tRNA-intron endonuclease activity	3	0.102041	0.0950806	CG33260, CG5626, CG31812	1510	3	7918	5.24371	1	0.824663	79.6243
GOTERM_MF_FAT	GO:0004521~endoribonuclease activity	8	0.272109	0.157109	CG33932, CG33260, CG5626, AGO2, CG40127, CG14057, CG13690, CG31812	1510	24	7918	1.7479	1	0.919814	93.4222
GOTERM_MF_FAT	GO:0016892~endoribonuclease activity, producing 3'-phosphomonoesters	3	0.102041	0.166463	CG33260, CG5626, CG31812	1510	4	7918	3.93278	1	0.92687	94.4931
GOTERM_MF_FAT	GO:0016894~endonuclease activity, active with either ribo- or deoxyribonucleic acids and producing 3'-phosphomonoesters	3	0.102041	0.321489	CG33260, CG5626, CG31812	1510	6	7918	2.62185	1	0.983128	99.7921
Annotation Cluster 33	Enrichment Score: 0.9429608537570555
Category	Term	Count	%	PValue	Genes	List Total	Pop Hits	Pop Total	Fold Enrichment	Bonferroni	Benjamini	FDR
GOTERM_BP_FAT	GO:0051258~protein polymerization	8	0.272109	0.0228803	CDC42, ARC-P20, ALIX, BETATUB85D, ALPHATUB84B, BETATUB97EF, ALPHATUB84D, BETATUB56D	1203	20	7937	2.63907	1	0.402827	33.0065
GOTERM_BP_FAT	GO:0008154~actin polymerization or depolymerization	4	0.136054	0.225485	CDC42, ARC-P20, ALIX, CAPT	1203	11	7937	2.39915	1	0.960741	98.7991
GOTERM_BP_FAT	GO:0030041~actin filament polymerization	3	0.102041	0.287435	CDC42, ARC-P20, ALIX	1203	7	7937	2.82757	1	0.981385	99.7163
Annotation Cluster 34	Enrichment Score: 0.9292263708498221
Category	Term	Count	%	PValue	Genes	List Total	Pop Hits	Pop Total	Fold Enrichment	Bonferroni	Benjamini	FDR
GOTERM_BP_FAT	GO:0009132~nucleoside diphosphate metabolic process	4	0.136054	0.0484772	AWD, ADK2, ADK3, CG5757	1203	6	7937	4.39845	1	0.612204	57.6831
GOTERM_BP_FAT	GO:0009133~nucleoside diphosphate biosynthetic process	3	0.102041	0.0618241	ADK2, ADK3, CG5757	1203	3	7937	6.59767	1	0.684682	66.8609
GOTERM_MF_FAT	GO:0019205~nucleobase, nucleoside, nucleotide kinase activity	10	0.340136	0.0697154	AWD, CG11811, CG5626, CG15547, ADK2, ADY43A, ADK3, CG6364, CG5757, CG11255	1510	28	7918	1.87275	1	0.752583	68.3569
GOTERM_MF_FAT	GO:0016776~phosphotransferase activity, phosphate group as acceptor	8	0.272109	0.108678	AWD, CG11811, CG5626, CG10268, CG15547, ADK2, ADK3, CG5757	1510	22	7918	1.9068	1	0.860896	83.989
GOTERM_MF_FAT	GO:0004017~adenylate kinase activity	3	0.102041	0.321489	CG5626, ADK2, ADK3	1510	6	7918	2.62185	1	0.983128	99.7921
GOTERM_MF_FAT	GO:0019201~nucleotide kinase activity	5	0.170068	0.364176	CG11811, CG5626, ADK2, ADK3, CG5757	1510	16	7918	1.63866	1	0.988404	99.9261
Annotation Cluster 35	Enrichment Score: 0.8877268659860024
Category	Term	Count	%	PValue	Genes	List Total	Pop Hits	Pop Total	Fold Enrichment	Bonferroni	Benjamini	FDR
GOTERM_BP_FAT	GO:0045454~cell redox homeostasis	16	0.544218	0.0100798	BTHD, CG4670, CG11007, CABP1, CG12206, CG4199, CG6523, CG11790, CG3887, CG3719, CG17843, CG5554, CG1837, CG14407, CG15456, CG5027	1203	53	7937	1.99175	1	0.243009	16.082
GOTERM_BP_FAT	GO:0019725~cellular homeostasis	20	0.680272	0.317628	BTHD, CG4670, CG11007, CABP1, CG12206, CG4199, CG6523, CG3408, CG11790, CG3887, CG3719, CG17843, CG5554, CG1837, CG14407, CG15456, CG5027, ATP7, ADAR, CG1598	1203	111	7937	1.18877	1	0.987365	99.8659
GOTERM_BP_FAT	GO:0042592~homeostatic process	24	0.816327	0.678342	CG4670, BTHD, CG11007, CG6136, CABP1, CG12206, CG4199, ATPALPHA, CG3408, CG6523, CG11790, CG11077, CG3887, CG3719, CG17843, CG5554, CG1837, CG14407, CAV, CG15456, ATP7, CG5027, ADAR, CG1598	1203	163	7937	0.971436	1	0.999895	100
Annotation Cluster 36	Enrichment Score: 0.8720447118591036
Category	Term	Count	%	PValue	Genes	List Total	Pop Hits	Pop Total	Fold Enrichment	Bonferroni	Benjamini	FDR
GOTERM_BP_FAT	GO:0034623~cellular macromolecular complex disassembly	7	0.238095	0.033094	CG30100, CG4901, CG5705, CG13163, AUX, ATL, CG6094	1203	17	7937	2.71669	1	0.495774	44.146
GOTERM_BP_FAT	GO:0032984~macromolecular complex disassembly	7	0.238095	0.033094	CG30100, CG4901, CG5705, CG13163, AUX, ATL, CG6094	1203	17	7937	2.71669	1	0.495774	44.146
GOTERM_BP_FAT	GO:0022411~cellular component disassembly	8	0.272109	0.119389	CG30100, CG4901, CG5705, CG13163, AUX, CAP-G, ATL, CG6094	1203	28	7937	1.88505	1	0.859661	88.9232
GOTERM_BP_FAT	GO:0043624~cellular protein complex disassembly	5	0.170068	0.150193	CG30100, CG5705, AUX, ATL, CG6094	1203	14	7937	2.35631	1	0.905458	94.0188
GOTERM_BP_FAT	GO:0043241~protein complex disassembly	5	0.170068	0.150193	CG30100, CG5705, AUX, ATL, CG6094	1203	14	7937	2.35631	1	0.905458	94.0188
GOTERM_BP_FAT	GO:0006415~translational termination	3	0.102041	0.226873	CG30100, CG5705, CG6094	1203	6	7937	3.29884	1	0.960872	98.8358
GOTERM_MF_FAT	GO:0003747~translation release factor activity	3	0.102041	0.397235	CG30100, CG5705, CG6094	1510	7	7918	2.2473	1	0.991453	99.9684
GOTERM_MF_FAT	GO:0008079~translation termination factor activity	3	0.102041	0.397235	CG30100, CG5705, CG6094	1510	7	7918	2.2473	1	0.991453	99.9684
Annotation Cluster 37	Enrichment Score: 0.7789556491245465
Category	Term	Count	%	PValue	Genes	List Total	Pop Hits	Pop Total	Fold Enrichment	Bonferroni	Benjamini	FDR
GOTERM_MF_FAT	GO:0016884~carbon-nitrogen ligase activity, with glutamine as amido-N-donor	7	0.238095	0.0239103	CG5463, CG5191, CG5112, ASPARAGINE-SYNTHETASE, ADE2, CG17486, BUR	1510	13	7918	2.82354	1	0.501066	31.9782
GOTERM_BP_FAT	GO:0006541~glutamine metabolic process	4	0.136054	0.225485	CG32155, ADE2, CG17486, BUR	1203	11	7937	2.39915	1	0.960741	98.7991
GOTERM_BP_FAT	GO:0009064~glutamine family amino acid metabolic process	4	0.136054	0.853947	CG32155, ADE2, CG17486, BUR	1203	30	7937	0.87969	1	0.999996	100
Annotation Cluster 38	Enrichment Score: 0.7565105254761247
Category	Term	Count	%	PValue	Genes	List Total	Pop Hits	Pop Total	Fold Enrichment	Bonferroni	Benjamini	FDR
GOTERM_BP_FAT	GO:0008643~carbohydrate transport	6	0.204082	0.124135	CG30035, CG5802, CG14040, CG31100, CG3774, CG34360	1203	18	7937	2.19922	1	0.865111	89.9123
GOTERM_MF_FAT	GO:0015165~pyrimidine nucleotide sugar transmembrane transporter activity	4	0.136054	0.182626	CG5802, CG14040, CG14511, CG3774	1510	8	7918	2.62185	1	0.940428	95.9682
GOTERM_MF_FAT	GO:0005338~nucleotide-sugar transmembrane transporter activity	4	0.136054	0.237142	CG5802, CG14040, CG14511, CG3774	1510	9	7918	2.33054	1	0.964767	98.6567
Annotation Cluster 39	Enrichment Score: 0.7326558330877097
Category	Term	Count	%	PValue	Genes	List Total	Pop Hits	Pop Total	Fold Enrichment	Bonferroni	Benjamini	FDR
GOTERM_BP_FAT	GO:0006084~acetyl-CoA metabolic process	10	0.340136	0.0719105	CG4095, CG10219, CG5214, CG5362, CG6439, ATPCL, CG5261, CG5028, CG5599, ACON	1203	35	7937	1.88505	1	0.728841	72.5149
GOTERM_BP_FAT	GO:0006099~tricarboxylic acid cycle	8	0.272109	0.201065	CG4095, CG10219, CG5214, CG5362, CG6439, CG5028, CG5599, ACON	1203	32	7937	1.64942	1	0.948629	97.9449
GOTERM_BP_FAT	GO:0046356~acetyl-CoA catabolic process	8	0.272109	0.201065	CG4095, CG10219, CG5214, CG5362, CG6439, CG5028, CG5599, ACON	1203	32	7937	1.64942	1	0.948629	97.9449
GOTERM_BP_FAT	GO:0009109~coenzyme catabolic process	8	0.272109	0.224239	CG4095, CG10219, CG5214, CG5362, CG6439, CG5028, CG5599, ACON	1203	33	7937	1.59944	1	0.960703	98.7652
GOTERM_BP_FAT	GO:0051187~cofactor catabolic process	8	0.272109	0.248282	CG4095, CG10219, CG5214, CG5362, CG6439, CG5028, CG5599, ACON	1203	34	7937	1.55239	1	0.970133	99.2839
GOTERM_BP_FAT	GO:0009060~aerobic respiration	8	0.272109	0.248282	CG4095, CG10219, CG5214, CG5362, CG6439, CG5028, CG5599, ACON	1203	34	7937	1.55239	1	0.970133	99.2839
Annotation Cluster 40	Enrichment Score: 0.7235869440233591
Category	Term	Count	%	PValue	Genes	List Total	Pop Hits	Pop Total	Fold Enrichment	Bonferroni	Benjamini	FDR
GOTERM_BP_FAT	GO:0008104~protein localization	72	2.44898	0.056097	CG11110, 140UP, AUR, CG6194, BORA, CG31229, CG34132, CG14542, CG14749, ANK, CDC42, CG40042, ALPHA-ADAPTIN, ALPHACOP, AUT1, ATG5, ATG4, CG32350, CG6488, AP-2SIGMA, CAR, CG5885, CG4663, AP-1GAMMA, AKAP200, CG33331, CG4618, APKC, CG5857, ARF79F, ARM, CG1968, ALPHA-CAT, CG5498, CG3639, ARF102F, CG32164, CG11779, ARF51F, AP-47, BLP, BY, CG4289, CG10882, BETA'COP, AMPH, ACT5C, CG1599, BETACOP, CACT, CD…	1203	392	7937	1.21182	1	0.651148	63.18
GOTERM_BP_FAT	GO:0015031~protein transport	52	1.76871	0.0787582	CG11110, 140UP, CG6194, CG31229, CG34132, CG14542, CG14749, CG40042, ALPHA-ADAPTIN, AUT1, ALPHACOP, ATG5, ATG4, CG32350, CG6488, CAR, AP-2SIGMA, CG5885, CG4663, AP-1GAMMA, CG33331, CG4618, CG5857, ARF79F, CG1968, CG5498, ARF102F, CG3639, CG32164, CG11779, ARF51F, AP-47, BLP, CG4289, CG10882, BETA'COP, CG1599, BETACOP, CDM, ARR, AP-50, CG2774, CG40451, CG6259, CG4538, BOCA, CG15099, CG6359, CG4848…	1203	278	7937	1.2341	1	0.756157	75.8211
GOTERM_BP_FAT	GO:0045184~establishment of protein localization	52	1.76871	0.109955	CG11110, 140UP, CG6194, CG31229, CG34132, CG14542, CG14749, CG40042, ALPHA-ADAPTIN, AUT1, ALPHACOP, ATG5, ATG4, CG32350, CG6488, CAR, AP-2SIGMA, CG5885, CG4663, AP-1GAMMA, CG33331, CG4618, CG5857, ARF79F, CG1968, CG5498, ARF102F, CG3639, CG32164, CG11779, ARF51F, AP-47, BLP, CG4289, CG10882, BETA'COP, CG1599, BETACOP, CDM, ARR, AP-50, CG2774, CG40451, CG6259, CG4538, BOCA, CG15099, CG6359, CG4848…	1203	285	7937	1.20379	1	0.843267	86.6799
GOTERM_BP_FAT	GO:0046907~intracellular transport	54	1.83673	0.204405	CG11110, ARF72A, CG4074, CG5161, CG31229, CG34132, CG1628, CG14749, ALPHA-ADAPTIN, ALPHACOP, CAR, AP-2SIGMA, CG3476, CG5885, CG4663, AP-1GAMMA, CG33331, ARALAR1, ARF79F, ARF102F, CG3639, CG32164, CG32135, CG11779, ARF51F, AP-47, CG10320, CG18317, CG4289, CG10882, CG3156, BETA'COP, CG3071, CG1599, BETACOP, CDM, CG33635, ARR, AGO2, AP-50, CCS, CG10225, CG11814, CG2774, CG2158, CG1907, BOCA, CG6359,…	1203	313	7937	1.13826	1	0.949549	98.0886
GOTERM_BP_FAT	GO:0034613~cellular protein localization	31	1.05442	0.300946	AP-47, CG11110, CG4289, CG10882, CG31229, CG34132, BETA'COP, BETACOP, CG1599, ALPHA-ADAPTIN, ALPHACOP, CDM, ARR, AP-50, CAR, AP-2SIGMA, CG5885, CG4663, CG2774, CG6404, AP-1GAMMA, CG33331, CG4942, BOCA, CG6359, CG3639, CG32164, AP-1SIGMA, CG11779, CG13887, CG10420	1203	179	7937	1.14261	1	0.984074	99.7963
GOTERM_BP_FAT	GO:0006886~intracellular protein transport	29	0.986395	0.394388	AP-47, CG11110, CG4289, CG10882, CG31229, CG34132, BETA'COP, BETACOP, CG1599, ALPHA-ADAPTIN, ALPHACOP, CDM, ARR, AP-50, CAR, AP-2SIGMA, CG5885, CG4663, CG2774, AP-1GAMMA, CG33331, BOCA, CG6359, CG3639, CG32164, AP-1SIGMA, CG11779, CG13887, CG10420	1203	174	7937	1.09961	1	0.995038	99.983
GOTERM_BP_FAT	GO:0070727~cellular macromolecule localization	35	1.19048	0.730365	AP-47, CG11110, CAPU, CG4289, CG10882, CG31229, CG34132, BETA'COP, BETACOP, CG1599, ALPHA-ADAPTIN, ALPHACOP, CDM, ARR, AP-2SIGMA, AP-50, CAR, CG5885, CG4663, BICD, BLUE, CG2774, CG6404, AP-1GAMMA, CG33331, CG4942, BOCA, CG6359, CG3639, CG32164, AP-1SIGMA, CG11779, BTZ, CG13887, CG10420	1203	244	7937	0.946387	1	0.999954	100
Annotation Cluster 41	Enrichment Score: 0.6944959695147352
Category	Term	Count	%	PValue	Genes	List Total	Pop Hits	Pop Total	Fold Enrichment	Bonferroni	Benjamini	FDR
GOTERM_MF_FAT	GO:0004549~tRNA-specific ribonuclease activity	5	0.170068	0.0479543	CG33932, CG33260, CG5626, CG14057, CG31812	1510	8	7918	3.27732	1	0.670919	54.2729
GOTERM_MF_FAT	GO:0004521~endoribonuclease activity	8	0.272109	0.157109	CG33932, CG33260, CG5626, AGO2, CG40127, CG14057, CG13690, CG31812	1510	24	7918	1.7479	1	0.919814	93.4222
GOTERM_MF_FAT	GO:0004540~ribonuclease activity	12	0.408163	0.203895	CG33932, CG10214, CG33260, CG11337, CG5626, ARP5, AGO2, CG40127, CG14057, CG13690, CG16940, CG31812	1510	44	7918	1.4301	1	0.949836	97.3504
GOTERM_MF_FAT	GO:0004518~nuclease activity	20	0.680272	0.448271	CG18271, CG6171, CG42257, CG12877, CG33260, CG3308, CG5626, ARP5, CG40127, CG13690, CG16940, CG31812, CG33932, CG4853, CG10214, CG6744, CG3358, CG11337, AGO2, CG14057	1510	95	7918	1.10394	1	0.994617	99.9923
GOTERM_MF_FAT	GO:0004519~endonuclease activity	11	0.37415	0.489267	CG33932, CG6171, CG33260, CG3308, CG5626, CG3358, AGO2, CG40127, CG14057, CG13690, CG31812	1510	50	7918	1.15362	1	0.996227	99.9977
Annotation Cluster 42	Enrichment Score: 0.6877601405354754
Category	Term	Count	%	PValue	Genes	List Total	Pop Hits	Pop Total	Fold Enrichment	Bonferroni	Benjamini	FDR
GOTERM_BP_FAT	GO:0030833~regulation of actin filament polymerization	7	0.238095	0.0244695	BTK29A, ARPC3A, ALPHA-SPEC, ARC-P34, ATX2, BETA-SPEC, ARP66B	1203	16	7937	2.88648	1	0.41428	34.8675
GOTERM_BP_FAT	GO:0008064~regulation of actin polymerization or depolymerization	8	0.272109	0.0299546	BTK29A, ARPC3A, ARP14D, ALPHA-SPEC, ARC-P34, ATX2, BETA-SPEC, ARP66B	1203	21	7937	2.5134	1	0.471205	40.923
GOTERM_BP_FAT	GO:0030832~regulation of actin filament length	8	0.272109	0.0299546	BTK29A, ARPC3A, ARP14D, ALPHA-SPEC, ARC-P34, ATX2, BETA-SPEC, ARP66B	1203	21	7937	2.5134	1	0.471205	40.923
GOTERM_BP_FAT	GO:0032271~regulation of protein polymerization	7	0.238095	0.0434671	BTK29A, ARPC3A, ALPHA-SPEC, ARC-P34, ATX2, BETA-SPEC, ARP66B	1203	18	7937	2.56576	1	0.58134	53.6569
GOTERM_BP_FAT	GO:0045478~fusome organization	5	0.170068	0.121081	BTK29A, ASP, ALPHA-SPEC, BGCN, BETA-SPEC	1203	13	7937	2.53757	1	0.859804	89.2858
GOTERM_BP_FAT	GO:0032956~regulation of actin cytoskeleton organization	8	0.272109	0.137945	BTK29A, ARPC3A, ARP14D, ALPHA-SPEC, ARC-P34, ATX2, BETA-SPEC, ARP66B	1203	29	7937	1.82005	1	0.890509	92.338
GOTERM_BP_FAT	GO:0032970~regulation of actin filament-based process	8	0.272109	0.137945	BTK29A, ARPC3A, ARP14D, ALPHA-SPEC, ARC-P34, ATX2, BETA-SPEC, ARP66B	1203	29	7937	1.82005	1	0.890509	92.338
GOTERM_BP_FAT	GO:0043254~regulation of protein complex assembly	7	0.238095	0.143906	BTK29A, ARPC3A, ALPHA-SPEC, ARC-P34, ATX2, BETA-SPEC, ARP66B	1203	24	7937	1.92432	1	0.898037	93.2049
GOTERM_BP_FAT	GO:0033043~regulation of organelle organization	18	0.612245	0.48855	ARP14D, ALPHATUB84B, CDC23, ALPHA-SPEC, ARC-P34, CDC16, ADA2B, BETA-SPEC, ATAC1, BTK29A, AGO, ARPC3A, BUB1, BUBR1, ATX2, CG11419, ARP66B, BUB3, 14-3-3EPSILON	1203	109	7937	1.08952	1	0.998464	99.9991
GOTERM_BP_FAT	GO:0051493~regulation of cytoskeleton organization	8	0.272109	0.649869	BTK29A, ARPC3A, ARP14D, ALPHA-SPEC, ARC-P34, ATX2, BETA-SPEC, ARP66B	1203	50	7937	1.05563	1	0.999835	100
GOTERM_BP_FAT	GO:0032535~regulation of cellular component size	14	0.47619	0.75385	BIF, ARP14D, ALPHA-SPEC, BUN, ARC-P34, CDK4, BSK, BETA-SPEC, BTK29A, AKT1, ARPC3A, ATX2, ARP66B, BTSZ	1203	99	7937	0.933004	1	0.999969	100
GOTERM_BP_FAT	GO:0044087~regulation of cellular component biogenesis	11	0.37415	0.790497	BLUE, BTK29A, BIC, ARPC3A, CAMKII, ARMI, ALPHA-SPEC, ARC-P34, ATX2, BETA-SPEC, ARP66B	1203	80	7937	0.90718	1	0.999983	100
GOTERM_BP_FAT	GO:0016198~axon choice point recognition	3	0.102041	0.829162	AB, ALPHA-SPEC, BETA-SPEC	1203	20	7937	0.989651	1	0.999992	100
GOTERM_BP_FAT	GO:0008038~neuron recognition	4	0.136054	0.985107	AB, ALPHA-SPEC, BETA-SPEC, ARP66B	1203	49	7937	0.538586	1	1	100
GOTERM_BP_FAT	GO:0008037~cell recognition	4	0.136054	0.986908	AB, ALPHA-SPEC, BETA-SPEC, ARP66B	1203	50	7937	0.527814	1	1	100
Annotation Cluster 43	Enrichment Score: 0.684836749084014
Category	Term	Count	%	PValue	Genes	List Total	Pop Hits	Pop Total	Fold Enrichment	Bonferroni	Benjamini	FDR
GOTERM_BP_FAT	GO:0032259~methylation	16	0.544218	0.0100798	CG14907, CG14906, ART1, ART4, ART3, AFT, CG1074, ART7, CG6379, CAF1, CG11447, CG5933, BIN3, ASH1, CG6133, CG14478, CG5220	1203	53	7937	1.99175	1	0.243009	16.082
GOTERM_BP_FAT	GO:0006730~one-carbon metabolic process	19	0.646259	0.0322952	CG32698, CG14907, CG14906, ART1, ART4, ART3, AFT, ART7, CG1074, AHCY13, CG6379, CG3011, CAF1, CG11447, CG5933, BIN3, ASH1, CG6133, CG14478, CG5220	1203	76	7937	1.64942	1	0.490545	43.3421
GOTERM_BP_FAT	GO:0043414~biopolymer methylation	12	0.408163	0.0513042	ART4, ART3, ART7, CAF1, CG11447, CG5933, BIN3, ASH1, CG6133, CG14478, CG5220, ART1	1203	43	7937	1.84121	1	0.630289	59.807
GOTERM_MF_FAT	GO:0008170~N-methyltransferase activity	12	0.408163	0.055326	ART4, ART3, CG11837, ART8, CG4565, ART7, CG40351, CG6388, CAF1, CG32152, ASH1, ART1	1510	35	7918	1.79784	1	0.69465	59.5963
GOTERM_MF_FAT	GO:0008276~protein methyltransferase activity	10	0.340136	0.140171	ART4, ART3, ART8, CG4565, ART7, CG40351, CAF1, CG32152, ASH1, ART1	1510	32	7918	1.63866	1	0.908924	90.9706
GOTERM_BP_FAT	GO:0008213~protein amino acid alkylation	7	0.238095	0.2421	ART4, ART3, ART7, CAF1, BIN3, ASH1, ART1	1203	28	7937	1.64942	1	0.96762	99.1749
GOTERM_BP_FAT	GO:0006479~protein amino acid methylation	7	0.238095	0.2421	ART4, ART3, ART7, CAF1, BIN3, ASH1, ART1	1203	28	7937	1.64942	1	0.96762	99.1749
GOTERM_MF_FAT	GO:0042054~histone methyltransferase activity	6	0.204082	0.370847	ART4, CG4565, CG40351, CAF1, ASH1, ART1	1510	21	7918	1.4982	1	0.9891	99.9375
GOTERM_BP_FAT	GO:0016569~covalent chromatin modification	9	0.306122	0.607312	ART4, BORR, BRE1, BALL, CAF1, ASH1, CG2051, ART1, BUR	1203	55	7937	1.07962	1	0.999718	100
GOTERM_BP_FAT	GO:0016570~histone modification	9	0.306122	0.607312	ART4, BORR, BRE1, BALL, CAF1, ASH1, CG2051, ART1, BUR	1203	55	7937	1.07962	1	0.999718	100
GOTERM_BP_FAT	GO:0016571~histone methylation	4	0.136054	0.636722	ART4, CAF1, ASH1, ART1	1203	21	7937	1.2567	1	0.999797	100
GOTERM_MF_FAT	GO:0018024~histone-lysine N-methyltransferase activity	4	0.136054	0.731136	CG4565, CG40351, CAF1, ASH1	1510	19	7918	1.10394	1	0.999838	100
GOTERM_MF_FAT	GO:0016278~lysine N-methyltransferase activity	4	0.136054	0.731136	CG4565, CG40351, CAF1, ASH1	1510	19	7918	1.10394	1	0.999838	100
GOTERM_MF_FAT	GO:0016279~protein-lysine N-methyltransferase activity	4	0.136054	0.731136	CG4565, CG40351, CAF1, ASH1	1510	19	7918	1.10394	1	0.999838	100
Annotation Cluster 44	Enrichment Score: 0.6823975686959971
Category	Term	Count	%	PValue	Genes	List Total	Pop Hits	Pop Total	Fold Enrichment	Bonferroni	Benjamini	FDR
GOTERM_BP_FAT	GO:0006122~mitochondrial electron transport, ubiquinol to cytochrome c	6	0.204082	0.035336	CG32649, CG3731, CG4769, CG14482, CG3560, CG4169	1203	13	7937	3.04508	1	0.509063	46.3455
GOTERM_MF_FAT	GO:0016679~oxidoreductase activity, acting on diphenols and related substances as donors	5	0.170068	0.316666	CG3731, CG14482, CG42345, CG3560, CG4169	1510	15	7918	1.7479	1	0.983235	99.7672
GOTERM_MF_FAT	GO:0008121~ubiquinol-cytochrome-c reductase activity	4	0.136054	0.408127	CG3731, CG14482, CG3560, CG4169	1510	12	7918	1.7479	1	0.992482	99.9764
GOTERM_MF_FAT	GO:0016681~oxidoreductase activity, acting on diphenols and related substances as donors, cytochrome as acceptor	4	0.136054	0.408127	CG3731, CG14482, CG3560, CG4169	1510	12	7918	1.7479	1	0.992482	99.9764
Annotation Cluster 45	Enrichment Score: 0.6563421653682007
Category	Term	Count	%	PValue	Genes	List Total	Pop Hits	Pop Total	Fold Enrichment	Bonferroni	Benjamini	FDR
GOTERM_MF_FAT	GO:0048531~beta-1,3-galactosyltransferase activity	5	0.170068	0.140759	CG2975, CG3038, CG33145, CG34056, CG11357	1510	11	7918	2.3835	1	0.903397	91.0683
GOTERM_MF_FAT	GO:0008378~galactosyltransferase activity	8	0.272109	0.157109	CG2975, BRN, CG3038, BETA4GALT7, CG33145, CG34056, ALPHA4GT1, CG11357	1510	24	7918	1.7479	1	0.919814	93.4222
GOTERM_MF_FAT	GO:0035250~UDP-galactosyltransferase activity	5	0.170068	0.269717	BRN, CG3038, BETA4GALT7, CG33145, CG11357	1510	14	7918	1.87275	1	0.971405	99.3295
GOTERM_MF_FAT	GO:0008499~UDP-galactose:beta-N-acetylglucosamine beta-1,3-galactosyltransferase activity	3	0.102041	0.397235	CG3038, CG33145, CG11357	1510	7	7918	2.2473	1	0.991453	99.9684
Annotation Cluster 46	Enrichment Score: 0.6469961458885014
Category	Term	Count	%	PValue	Genes	List Total	Pop Hits	Pop Total	Fold Enrichment	Bonferroni	Benjamini	FDR
GOTERM_BP_FAT	GO:0030422~RNA interference, production of siRNA	4	0.136054	0.107545	AGO1, CBP80, AGO2, CBP20	1203	8	7937	3.29884	1	0.843073	86.0418
GOTERM_BP_FAT	GO:0045071~negative regulation of viral genome replication	3	0.102041	0.111356	CBP80, AGO2, CBP20	1203	4	7937	4.94825	1	0.84499	87.0382
GOTERM_BP_FAT	GO:0045069~regulation of viral genome replication	3	0.102041	0.111356	CBP80, AGO2, CBP20	1203	4	7937	4.94825	1	0.84499	87.0382
GOTERM_BP_FAT	GO:0048525~negative regulation of viral reproduction	3	0.102041	0.111356	CBP80, AGO2, CBP20	1203	4	7937	4.94825	1	0.84499	87.0382
GOTERM_BP_FAT	GO:0050792~regulation of viral reproduction	3	0.102041	0.111356	CBP80, AGO2, CBP20	1203	4	7937	4.94825	1	0.84499	87.0382
GOTERM_BP_FAT	GO:0016246~RNA interference	8	0.272109	0.157807	CG5060, ARMI, AGO1, CBP80, AGO2, CBP20, BEL, CG17265	1203	30	7937	1.75938	1	0.915602	94.8815
GOTERM_BP_FAT	GO:0031050~dsRNA fragmentation	4	0.136054	0.225485	AGO1, CBP80, AGO2, CBP20	1203	11	7937	2.39915	1	0.960741	98.7991
GOTERM_BP_FAT	GO:0043331~response to dsRNA	4	0.136054	0.225485	AGO1, CBP80, AGO2, CBP20	1203	11	7937	2.39915	1	0.960741	98.7991
GOTERM_BP_FAT	GO:0016441~posttranscriptional gene silencing	9	0.306122	0.252075	CG5060, ARMI, AGO1, CBP80, AGO2, AGO3, CBP20, BEL, CG17265	1203	40	7937	1.48448	1	0.970759	99.3439
GOTERM_BP_FAT	GO:0035194~posttranscriptional gene silencing by RNA	9	0.306122	0.252075	CG5060, ARMI, AGO1, CBP80, AGO2, AGO3, CBP20, BEL, CG17265	1203	40	7937	1.48448	1	0.970759	99.3439
GOTERM_BP_FAT	GO:0035196~gene silencing by miRNA, production of miRNAs	3	0.102041	0.347398	AGO1, CBP80, CBP20	1203	8	7937	2.47413	1	0.991157	99.938
GOTERM_BP_FAT	GO:0031047~gene silencing by RNA	9	0.306122	0.370878	CG5060, ARMI, AGO1, CBP80, AGO2, AGO3, CBP20, BEL, CG17265	1203	45	7937	1.31953	1	0.993453	99.9671
GOTERM_BP_FAT	GO:0035195~gene silencing by miRNA	3	0.102041	0.80648	AGO1, CBP80, CBP20	1203	19	7937	1.04174	1	0.999987	100
GOTERM_BP_FAT	GO:0010033~response to organic substance	9	0.306122	0.998947	ART4, AKT1, BR, ADHR, AGO1, CBP80, AGO2, ADH, CG5315, CBP20	1203	122	7937	0.486714	1	1	100
Annotation Cluster 47	Enrichment Score: 0.6451562552139919
Category	Term	Count	%	PValue	Genes	List Total	Pop Hits	Pop Total	Fold Enrichment	Bonferroni	Benjamini	FDR
GOTERM_BP_FAT	GO:0006733~oxidoreduction coenzyme metabolic process	8	0.272109	0.0299546	CG30493, CG30410, CG32174, CG17333, CG4747, CG2453, CG3714, CG15093	1203	21	7937	2.5134	1	0.471205	40.923
GOTERM_BP_FAT	GO:0006744~ubiquinone biosynthetic process	3	0.102041	0.347398	CG30493, CG32174, CG2453	1203	8	7937	2.47413	1	0.991157	99.938
GOTERM_BP_FAT	GO:0006743~ubiquinone metabolic process	3	0.102041	0.347398	CG30493, CG32174, CG2453	1203	8	7937	2.47413	1	0.991157	99.938
GOTERM_BP_FAT	GO:0042375~quinone cofactor metabolic process	3	0.102041	0.405556	CG30493, CG32174, CG2453	1203	9	7937	2.19922	1	0.99558	99.9877
GOTERM_BP_FAT	GO:0045426~quinone cofactor biosynthetic process	3	0.102041	0.405556	CG30493, CG32174, CG2453	1203	9	7937	2.19922	1	0.99558	99.9877
Annotation Cluster 48	Enrichment Score: 0.642961204853072
Category	Term	Count	%	PValue	Genes	List Total	Pop Hits	Pop Total	Fold Enrichment	Bonferroni	Benjamini	FDR
GOTERM_MF_FAT	GO:0004693~cyclin-dependent protein kinase activity	8	0.272109	0.0138316	CDC2, CDK8, CDC2C, CDK9, CDC2RK, CDK7, CDK4, CDK5	1510	15	7918	2.79664	1	0.370403	19.8903
GOTERM_MF_FAT	GO:0008353~RNA polymerase II carboxy-terminal domain kinase activity	4	0.136054	0.0875697	CDC2, CDK8, CDC2C, CDK9	1510	6	7918	3.49581	1	0.808169	76.7582
GOTERM_BP_FAT	GO:0000082~G1/S transition of mitotic cell cycle	3	0.102041	0.607546	CDC2, CDK8, CDC2C	1203	13	7937	1.52254	1	0.99971	100
GOTERM_BP_FAT	GO:0051329~interphase of mitotic cell cycle	3	0.102041	0.91032	CDC2, CDK8, CDC2C	1203	25	7937	0.791721	1	0.999999	100
GOTERM_BP_FAT	GO:0051325~interphase	3	0.102041	0.91032	CDC2, CDK8, CDC2C	1203	25	7937	0.791721	1	0.999999	100
Annotation Cluster 49	Enrichment Score: 0.6381380528364038
Category	Term	Count	%	PValue	Genes	List Total	Pop Hits	Pop Total	Fold Enrichment	Bonferroni	Benjamini	FDR
GOTERM_BP_FAT	GO:0048488~synaptic vesicle endocytosis	13	0.442177	0.00390173	AP-47, ARF72A, AP-1GAMMA, ARF79F, AMPH, ALPHA-ADAPTIN, ARF102F, AP-1SIGMA, AP-50, AP-2SIGMA, AUX, ARF51F, ARF84F	1203	35	7937	2.45056	0.999744	0.124905	6.5419
GOTERM_BP_FAT	GO:0006900~membrane budding	7	0.238095	0.0434671	AP-47, ALPHA-ADAPTIN, AP-1GAMMA, AP-1SIGMA, AP-50, AP-2SIGMA, BETA'COP	1203	18	7937	2.56576	1	0.58134	53.6569
GOTERM_BP_FAT	GO:0006901~vesicle coating	6	0.204082	0.0482994	AP-47, ALPHA-ADAPTIN, AP-1GAMMA, AP-1SIGMA, AP-50, AP-2SIGMA	1203	14	7937	2.82757	1	0.614145	57.546
GOTERM_BP_FAT	GO:0016183~synaptic vesicle coating	6	0.204082	0.0482994	AP-47, ALPHA-ADAPTIN, AP-1GAMMA, AP-1SIGMA, AP-50, AP-2SIGMA	1203	14	7937	2.82757	1	0.614145	57.546
GOTERM_BP_FAT	GO:0016050~vesicle organization	10	0.340136	0.051752	AP-47, ALPHA-ADAPTIN, AP-1GAMMA, AP-1SIGMA, CAR, AP-50, AP-2SIGMA, BETA'COP, CA, CDASE	1203	33	7937	1.99929	1	0.630301	60.1341
GOTERM_BP_FAT	GO:0070142~synaptic vesicle budding	6	0.204082	0.0815412	AP-47, ALPHA-ADAPTIN, AP-1GAMMA, AP-1SIGMA, AP-50, AP-2SIGMA	1203	16	7937	2.47413	1	0.765776	77.0546
GOTERM_BP_FAT	GO:0016185~synaptic vesicle budding from presynaptic membrane	6	0.204082	0.0815412	AP-47, ALPHA-ADAPTIN, AP-1GAMMA, AP-1SIGMA, AP-50, AP-2SIGMA	1203	16	7937	2.47413	1	0.765776	77.0546
GOTERM_BP_FAT	GO:0007269~neurotransmitter secretion	17	0.578231	0.481494	AP-47, AP-1GAMMA, ARF72A, CANB2, ALPHA-SPEC, ARF79F, CDK5, BETA-SPEC, AMPH, ALPHA-ADAPTIN, ARF102F, AP-1SIGMA, AP-50, AP-2SIGMA, ARF51F, ARF84F, CDASE	1203	102	7937	1.09961	1	0.998442	99.9988
GOTERM_BP_FAT	GO:0003001~generation of a signal involved in cell-cell signaling	17	0.578231	0.498271	AP-47, AP-1GAMMA, ARF72A, CANB2, ALPHA-SPEC, ARF79F, CDK5, BETA-SPEC, AMPH, ALPHA-ADAPTIN, ARF102F, AP-1SIGMA, AP-50, AP-2SIGMA, ARF51F, ARF84F, CDASE	1203	103	7937	1.08894	1	0.998604	99.9993
GOTERM_BP_FAT	GO:0048489~synaptic vesicle transport	15	0.510204	0.501774	AP-47, AP-1GAMMA, ARF72A, ARF79F, AMPH, ALPHA-ADAPTIN, ARF102F, AP-1SIGMA, AP-50, AP-2SIGMA, AUX, ARF51F, ARF84F, CDASE, BTSZ	1203	90	7937	1.09961	1	0.998654	99.9994
GOTERM_BP_FAT	GO:0001505~regulation of neurotransmitter levels	17	0.578231	0.611135	AP-47, AP-1GAMMA, ARF72A, CANB2, ALPHA-SPEC, ARF79F, CDK5, BETA-SPEC, AMPH, ALPHA-ADAPTIN, ARF102F, AP-1SIGMA, AP-50, AP-2SIGMA, ARF51F, ARF84F, CDASE	1203	110	7937	1.01964	1	0.999713	100
GOTERM_BP_FAT	GO:0032940~secretion by cell	18	0.612245	0.628667	AP-47, AP-1GAMMA, ARF72A, CANB2, ALPHA-SPEC, ARF79F, CDK5, BETA-SPEC, AMPH, ALPHA-ADAPTIN, ARF102F, AP-1SIGMA, AP-50, CAR, AP-2SIGMA, ARF51F, ARF84F, CDASE	1203	118	7937	1.00642	1	0.999787	100
GOTERM_BP_FAT	GO:0046903~secretion	18	0.612245	0.72339	AP-47, AP-1GAMMA, ARF72A, CANB2, ALPHA-SPEC, ARF79F, CDK5, BETA-SPEC, AMPH, ALPHA-ADAPTIN, ARF102F, AP-1SIGMA, AP-50, CAR, AP-2SIGMA, ARF51F, ARF84F, CDASE	1203	125	7937	0.950065	1	0.999949	100
GOTERM_BP_FAT	GO:0006836~neurotransmitter transport	18	0.612245	0.735617	AP-47, AP-1GAMMA, ARF72A, CANB2, ALPHA-SPEC, CG15279, ARF79F, CDK5, BETA-SPEC, AMPH, ALPHA-ADAPTIN, ARF102F, AP-1SIGMA, AP-50, AP-2SIGMA, ARF51F, ARF84F, CDASE	1203	126	7937	0.942525	1	0.999958	100
GOTERM_BP_FAT	GO:0007268~synaptic transmission	20	0.680272	0.985054	AP-47, AP-1GAMMA, ARF72A, CANB2, ALPHA-SPEC, ARF79F, CDK5, CALS, BETA-SPEC, AMPH, ALPHA-ADAPTIN, CAMKII, ARF102F, AP-1SIGMA, CA-P60A, AP-50, AP-2SIGMA, ARF51F, ARF84F, CDASE	1203	189	7937	0.698166	1	1	100
GOTERM_BP_FAT	GO:0019226~transmission of nerve impulse	20	0.680272	0.991091	AP-47, AP-1GAMMA, ARF72A, CANB2, ALPHA-SPEC, ARF79F, CDK5, CALS, BETA-SPEC, AMPH, ALPHA-ADAPTIN, CAMKII, ARF102F, AP-1SIGMA, CA-P60A, AP-50, AP-2SIGMA, ARF51F, ARF84F, CDASE	1203	196	7937	0.673232	1	1	100
GOTERM_BP_FAT	GO:0007267~cell-cell signaling	20	0.680272	0.997268	AP-47, AP-1GAMMA, ARF72A, CANB2, ALPHA-SPEC, ARF79F, CDK5, CALS, BETA-SPEC, AMPH, ALPHA-ADAPTIN, CAMKII, ARF102F, AP-1SIGMA, CA-P60A, AP-50, AP-2SIGMA, ARF51F, ARF84F, CDASE	1203	211	7937	0.625372	1	1	100
GOTERM_BP_FAT	GO:0050877~neurological system process	31	1.05442	1	AP-47, ARF72A, CAM, CANB2, 14-3-3ZETA, CALS, BETA-SPEC, AMPH, ALPHA-ADAPTIN, ADF1, CAMKII, CA-P60A, AP-50, AP-2SIGMA, 14-3-3EPSILON, CDSA, CAMTA, AS, AP-1GAMMA, ATPALPHA, APKC, ALPHA-SPEC, ARF79F, CDK5, BTV, ARF102F, ARMI, AP-1SIGMA, ARF51F, ARF84F, CDASE	1203	546	7937	0.374593	1	1	100
Annotation Cluster 50	Enrichment Score: 0.6152515174482797
Category	Term	Count	%	PValue	Genes	List Total	Pop Hits	Pop Total	Fold Enrichment	Bonferroni	Benjamini	FDR
GOTERM_BP_FAT	GO:0010876~lipid localization	10	0.340136	0.051752	CG42321, AKT1, CG31729, ADP, CG30392, CG1513, CG6299, CG33298, CG3149, CG5077	1203	33	7937	1.99929	1	0.630301	60.1341
GOTERM_BP_FAT	GO:0006869~lipid transport	8	0.272109	0.119389	CG42321, CG31729, CG30392, CG1513, CG6299, CG33298, CG3149, CG5077	1203	28	7937	1.88505	1	0.859661	88.9232
GOTERM_BP_FAT	GO:0015914~phospholipid transport	3	0.102041	0.287435	CG42321, CG31729, CG33298	1203	7	7937	2.82757	1	0.981385	99.7163
GOTERM_MF_FAT	GO:0004012~phospholipid-translocating ATPase activity	3	0.102041	0.321489	CG42321, CG31729, CG33298	1510	6	7918	2.62185	1	0.983128	99.7921
GOTERM_MF_FAT	GO:0015247~aminophospholipid transporter activity	3	0.102041	0.321489	CG42321, CG31729, CG33298	1510	6	7918	2.62185	1	0.983128	99.7921
GOTERM_MF_FAT	GO:0005548~phospholipid transporter activity	4	0.136054	0.51612	CG42321, CG31729, CG6565, CG33298	1510	14	7918	1.4982	1	0.997234	99.999
GOTERM_MF_FAT	GO:0005319~lipid transporter activity	7	0.238095	0.520866	CG42321, CG31729, CG30392, CG6299, CG6565, CG33298, CG3149	1510	30	7918	1.22353	1	0.997329	99.9992
Annotation Cluster 51	Enrichment Score: 0.6018731923329383
Category	Term	Count	%	PValue	Genes	List Total	Pop Hits	Pop Total	Fold Enrichment	Bonferroni	Benjamini	FDR
GOTERM_MF_FAT	GO:0016776~phosphotransferase activity, phosphate group as acceptor	8	0.272109	0.108678	AWD, CG11811, CG5626, CG10268, CG15547, ADK2, ADK3, CG5757	1510	22	7918	1.9068	1	0.860896	83.989
GOTERM_BP_FAT	GO:0006221~pyrimidine nucleotide biosynthetic process	4	0.136054	0.358014	AWD, CG4966, CG15547, CG5757	1203	14	7937	1.88505	1	0.992045	99.9533
GOTERM_BP_FAT	GO:0006220~pyrimidine nucleotide metabolic process	4	0.136054	0.402106	AWD, CG4966, CG15547, CG5757	1203	15	7937	1.75938	1	0.995428	99.9864
Annotation Cluster 52	Enrichment Score: 0.5902956355698253
Category	Term	Count	%	PValue	Genes	List Total	Pop Hits	Pop Total	Fold Enrichment	Bonferroni	Benjamini	FDR
GOTERM_BP_FAT	GO:0006123~mitochondrial electron transport, cytochrome c to oxygen	5	0.170068	0.181643	CG11015, CG10664, CG18809, CG2249, CG11043	1203	15	7937	2.19922	1	0.936348	96.8857
GOTERM_MF_FAT	GO:0016675~oxidoreductase activity, acting on heme group of donors	7	0.238095	0.19698	CG11015, CG10664, CG14235, CG18809, CG2249, CG11043, CG14077	1510	21	7918	1.7479	1	0.949697	96.9592
GOTERM_MF_FAT	GO:0016676~oxidoreductase activity, acting on heme group of donors, oxygen as acceptor	7	0.238095	0.19698	CG11015, CG10664, CG14235, CG18809, CG2249, CG11043, CG14077	1510	21	7918	1.7479	1	0.949697	96.9592
GOTERM_MF_FAT	GO:0015002~heme-copper terminal oxidase activity	7	0.238095	0.19698	CG11015, CG10664, CG14235, CG18809, CG2249, CG11043, CG14077	1510	21	7918	1.7479	1	0.949697	96.9592
GOTERM_MF_FAT	GO:0004129~cytochrome-c oxidase activity	7	0.238095	0.19698	CG11015, CG10664, CG14235, CG18809, CG2249, CG11043, CG14077	1510	21	7918	1.7479	1	0.949697	96.9592
GOTERM_MF_FAT	GO:0015077~monovalent inorganic cation transmembrane transporter activity	20	0.680272	0.488042	CG11015, CG14235, CG3731, ATPSYN-D, ATPSYN-B, ATPSYN-GAMMA, ATPALPHA, CG3560, CG4169, BLW, ATPSYN-BETA, CG14077, ATPSYN-CF6, CG10664, CG1746, CG14482, CG18809, CG11043, CG2249, CG3321	1510	97	7918	1.08118	1	0.996316	99.9977
GOTERM_MF_FAT	GO:0015078~hydrogen ion transmembrane transporter activity	19	0.646259	0.552799	CG11015, CG14235, CG3731, ATPSYN-D, ATPSYN-B, ATPSYN-GAMMA, CG3560, CG4169, BLW, ATPSYN-BETA, CG14077, ATPSYN-CF6, CG10664, CG1746, CG14482, CG18809, CG11043, CG2249, CG3321	1510	95	7918	1.04874	1	0.99823	99.9997
Annotation Cluster 53	Enrichment Score: 0.5719777885184759
Category	Term	Count	%	PValue	Genes	List Total	Pop Hits	Pop Total	Fold Enrichment	Bonferroni	Benjamini	FDR
GOTERM_BP_FAT	GO:0019438~aromatic compound biosynthetic process	5	0.170068	0.21501	BW, CG1749, CG2543, CG13090, CG14721	1203	16	7937	2.06177	1	0.955996	98.4848
GOTERM_BP_FAT	GO:0042558~pteridine and derivative metabolic process	5	0.170068	0.249866	BW, CG1749, CG2543, CG13090, CG18143	1203	17	7937	1.94049	1	0.970297	99.3096
GOTERM_BP_FAT	GO:0042559~pteridine and derivative biosynthetic process	4	0.136054	0.358014	BW, CG1749, CG2543, CG13090	1203	14	7937	1.88505	1	0.992045	99.9533
Annotation Cluster 54	Enrichment Score: 0.5318189603803197
Category	Term	Count	%	PValue	Genes	List Total	Pop Hits	Pop Total	Fold Enrichment	Bonferroni	Benjamini	FDR
GOTERM_MF_FAT	GO:0016864~intramolecular oxidoreductase activity, transposing S-S bonds	4	0.136054	0.293887	CG1837, CABP1, CG5027, CG5554	1510	10	7918	2.09748	1	0.978787	99.6077
GOTERM_MF_FAT	GO:0016862~intramolecular oxidoreductase activity, interconverting keto- and enol-groups	4	0.136054	0.293887	CG1837, CABP1, CG5027, CG5554	1510	10	7918	2.09748	1	0.978787	99.6077
GOTERM_MF_FAT	GO:0003756~protein disulfide isomerase activity	4	0.136054	0.293887	CG1837, CABP1, CG5027, CG5554	1510	10	7918	2.09748	1	0.978787	99.6077
Annotation Cluster 55	Enrichment Score: 0.5085107280148179
Category	Term	Count	%	PValue	Genes	List Total	Pop Hits	Pop Total	Fold Enrichment	Bonferroni	Benjamini	FDR
GOTERM_MF_FAT	GO:0019842~vitamin binding	23	0.782313	0.244514	CG33722, CG6199, CG1516, CG1486, CG1640, CG31120, CG31864, CG10657, CG6574, CG17689, CG2118, CG11208, ALAS, CG11899, CG11198, CG1665, CG12264, CG17036, CG3011, CG1753, CG6321, CG3823, CG5973, CG18749	1510	99	7918	1.21824	1	0.96488	98.8491
GOTERM_MF_FAT	GO:0030170~pyridoxal phosphate binding	10	0.340136	0.319322	CG11899, ALAS, CG1486, CG12264, CG1665, CG1640, CG31864, CG1753, CG3011, CG6321	1510	39	7918	1.34454	1	0.983244	99.7812
GOTERM_MF_FAT	GO:0070279~vitamin B6 binding	10	0.340136	0.319322	CG11899, ALAS, CG1486, CG12264, CG1665, CG1640, CG31864, CG1753, CG3011, CG6321	1510	39	7918	1.34454	1	0.983244	99.7812
GOTERM_MF_FAT	GO:0016769~transferase activity, transferring nitrogenous groups	6	0.204082	0.370847	CG11899, ALAS, CG6415, CG1640, CG6321, CG1673	1510	21	7918	1.4982	1	0.9891	99.9375
Annotation Cluster 56	Enrichment Score: 0.49071268110564364
Category	Term	Count	%	PValue	Genes	List Total	Pop Hits	Pop Total	Fold Enrichment	Bonferroni	Benjamini	FDR
GOTERM_MF_FAT	GO:0016410~N-acyltransferase activity	13	0.442177	0.255175	CG3585, CG14222, CG12560, CG11539, CG18177, ADA2B, CG15628, ALAS, CG11412, CG10414, CG2051, ARD1, ACF1	1510	51	7918	1.33663	1	0.966759	99.0822
GOTERM_MF_FAT	GO:0016407~acetyltransferase activity	14	0.47619	0.30466	CG14222, CG12560, CG10932, CG11539, CG18177, ADA2B, CG15628, CG11412, CG10414, CG1041, CG5261, CG2051, ARD1, ACF1	1510	58	7918	1.26572	1	0.98135	99.6929
GOTERM_MF_FAT	GO:0008080~N-acetyltransferase activity	11	0.37415	0.433719	CG11412, CG14222, CG12560, CG10414, CG11539, CG18177, ARD1, CG2051, ACF1, ADA2B, CG15628	1510	48	7918	1.20168	1	0.993779	99.9883
Annotation Cluster 57	Enrichment Score: 0.48460251914483327
Category	Term	Count	%	PValue	Genes	List Total	Pop Hits	Pop Total	Fold Enrichment	Bonferroni	Benjamini	FDR
GOTERM_BP_FAT	GO:0016339~calcium-dependent cell-cell adhesion	6	0.204082	0.202783	CAD96CA, CAD87A, CAT, CALS, CAD99C, CAD74A	1203	21	7937	1.88505	1	0.949133	98.0201
GOTERM_BP_FAT	GO:0016337~cell-cell adhesion	12	0.408163	0.274796	BRN, APC2, BIB, CAD96CA, CAD87A, ALPHA-SPEC, CAT, ALPHAPS5, ARM, CALS, CAD99C, CAD74A	1203	59	7937	1.3419	1	0.977589	99.6154
GOTERM_BP_FAT	GO:0007156~homophilic cell adhesion	5	0.170068	0.631176	CAD96CA, CAD87A, CALS, CAD99C, CAD74A	1203	28	7937	1.17816	1	0.999784	100
Annotation Cluster 58	Enrichment Score: 0.47126136981905337
Category	Term	Count	%	PValue	Genes	List Total	Pop Hits	Pop Total	Fold Enrichment	Bonferroni	Benjamini	FDR
GOTERM_MF_FAT	GO:0008135~translation factor activity, nucleic acid binding	21	0.714286	0.150595	CG30100, CG6412, 4EHP, CG31957, CG5705, ADAM, CG17737, CG4567, CG12413, CG5642, CDK9, CG33158, CG4849, BZD, CG13163, AGO1, AGO2, BRF, CG12736, CG10306, CG6094	1510	83	7918	1.32672	1	0.91316	92.5644
GOTERM_BP_FAT	GO:0006413~translational initiation	10	0.340136	0.457021	4EHP, ADAM, CG31957, CG17737, BZD, CG13163, CG12413, AGO2, BRF, CG10306	1203	55	7937	1.19958	1	0.997874	99.9974
GOTERM_MF_FAT	GO:0003743~translation initiation factor activity	12	0.408163	0.560362	4EHP, ADAM, CG31957, CG17737, BZD, CG13163, AGO1, CG12413, AGO2, CG5642, BRF, CG10306	1510	58	7918	1.08491	1	0.998377	99.9998
Annotation Cluster 59	Enrichment Score: 0.46917054541898184
Category	Term	Count	%	PValue	Genes	List Total	Pop Hits	Pop Total	Fold Enrichment	Bonferroni	Benjamini	FDR
GOTERM_BP_FAT	GO:0009167~purine ribonucleoside monophosphate metabolic process	5	0.170068	0.249866	CG32626, ADE3, ADE2, ADA, BUR	1203	17	7937	1.94049	1	0.970297	99.3096
GOTERM_BP_FAT	GO:0009126~purine nucleoside monophosphate metabolic process	5	0.170068	0.249866	CG32626, ADE3, ADE2, ADA, BUR	1203	17	7937	1.94049	1	0.970297	99.3096
GOTERM_BP_FAT	GO:0009168~purine ribonucleoside monophosphate biosynthetic process	5	0.170068	0.249866	CG32626, ADE3, ADE2, ADA, BUR	1203	17	7937	1.94049	1	0.970297	99.3096
GOTERM_BP_FAT	GO:0009127~purine nucleoside monophosphate biosynthetic process	5	0.170068	0.249866	CG32626, ADE3, ADE2, ADA, BUR	1203	17	7937	1.94049	1	0.970297	99.3096
GOTERM_BP_FAT	GO:0009161~ribonucleoside monophosphate metabolic process	5	0.170068	0.396064	CG32626, ADE3, ADE2, ADA, BUR	1203	21	7937	1.57087	1	0.995052	99.9838
GOTERM_BP_FAT	GO:0009156~ribonucleoside monophosphate biosynthetic process	5	0.170068	0.396064	CG32626, ADE3, ADE2, ADA, BUR	1203	21	7937	1.57087	1	0.995052	99.9838
GOTERM_BP_FAT	GO:0009124~nucleoside monophosphate biosynthetic process	9	0.306122	0.492925	CG32626, CG3216, CG14434, AC13E, CG4966, ADE3, ADE2, ADA, BUR	1203	50	7937	1.18758	1	0.9985	99.9992
GOTERM_BP_FAT	GO:0009123~nucleoside monophosphate metabolic process	9	0.306122	0.585452	CG32626, CG3216, CG14434, AC13E, CG4966, ADE3, ADE2, ADA, BUR	1203	54	7937	1.09961	1	0.999602	100
Annotation Cluster 60	Enrichment Score: 0.46458847636160033
Category	Term	Count	%	PValue	Genes	List Total	Pop Hits	Pop Total	Fold Enrichment	Bonferroni	Benjamini	FDR
GOTERM_BP_FAT	GO:0001522~pseudouridine synthesis	4	0.136054	0.183458	CG4038, CG6745, CG34140, CG4159	1203	10	7937	2.63907	1	0.937141	97.0031
GOTERM_MF_FAT	GO:0016866~intramolecular transferase activity	5	0.170068	0.411513	CG10627, CG10688, CG6745, CG34140, CG4159	1510	17	7918	1.54227	1	0.99256	99.9784
GOTERM_MF_FAT	GO:0009982~pseudouridine synthase activity	3	0.102041	0.534951	CG6745, CG34140, CG4159	1510	9	7918	1.7479	1	0.997697	99.9995
Annotation Cluster 61	Enrichment Score: 0.4489838645840671
Category	Term	Count	%	PValue	Genes	List Total	Pop Hits	Pop Total	Fold Enrichment	Bonferroni	Benjamini	FDR
GOTERM_BP_FAT	GO:0006733~oxidoreduction coenzyme metabolic process	8	0.272109	0.0299546	CG30493, CG30410, CG32174, CG17333, CG4747, CG2453, CG3714, CG15093	1203	21	7937	2.5134	1	0.471205	40.923
GOTERM_BP_FAT	GO:0006098~pentose-phosphate shunt	4	0.136054	0.107545	CG30410, CG17333, CG4747, CG15093	1203	8	7937	3.29884	1	0.843073	86.0418
GOTERM_BP_FAT	GO:0006739~NADP metabolic process	4	0.136054	0.107545	CG30410, CG17333, CG4747, CG15093	1203	8	7937	3.29884	1	0.843073	86.0418
GOTERM_BP_FAT	GO:0019362~pyridine nucleotide metabolic process	5	0.170068	0.121081	CG30410, CG17333, CG4747, CG3714, CG15093	1203	13	7937	2.53757	1	0.859804	89.2858
GOTERM_BP_FAT	GO:0006769~nicotinamide metabolic process	4	0.136054	0.269081	CG30410, CG17333, CG4747, CG15093	1203	12	7937	2.19922	1	0.976418	99.5594
GOTERM_BP_FAT	GO:0046496~nicotinamide nucleotide metabolic process	4	0.136054	0.269081	CG30410, CG17333, CG4747, CG15093	1203	12	7937	2.19922	1	0.976418	99.5594
GOTERM_BP_FAT	GO:0009820~alkaloid metabolic process	4	0.136054	0.269081	CG30410, CG17333, CG4747, CG15093	1203	12	7937	2.19922	1	0.976418	99.5594
GOTERM_BP_FAT	GO:0005996~monosaccharide metabolic process	18	0.612245	0.29484	BETA4GALNACTB, CG17333, CG30410, CG1516, CG12229, CG13369, CG4747, CG10467, CG5288, BSK, CG32445, CG5362, CG11249, CG10688, ALPHA-MAN-II, BETA4GALNACTA, BOTV, CG15093	1203	97	7937	1.22431	1	0.982776	99.7632
GOTERM_BP_FAT	GO:0043603~cellular amide metabolic process	4	0.136054	0.487157	CG30410, CG17333, CG4747, CG15093	1203	17	7937	1.55239	1	0.998469	99.999
GOTERM_BP_FAT	GO:0046164~alcohol catabolic process	9	0.306122	0.516705	CG31169, CG30410, CG17333, CG12229, CG11249, CG5362, CG4747, ADHR, ADH, CG15093	1203	51	7937	1.1643	1	0.998895	99.9997
GOTERM_BP_FAT	GO:0044275~cellular carbohydrate catabolic process	9	0.306122	0.516705	CG31169, CG30410, CG17333, CG12229, CG11249, CG5362, CG4747, CG33090, CG15093	1203	51	7937	1.1643	1	0.998895	99.9997
GOTERM_BP_FAT	GO:0019318~hexose metabolic process	14	0.47619	0.531319	CG17333, CG30410, CG1516, CG12229, CG4747, CG10467, CG5288, BSK, CG32445, CG11249, CG5362, CG10688, ALPHA-MAN-II, CG15093	1203	85	7937	1.08668	1	0.999118	99.9998
GOTERM_BP_FAT	GO:0019320~hexose catabolic process	7	0.238095	0.651452	CG30410, CG17333, CG12229, CG11249, CG5362, CG4747, CG15093	1203	43	7937	1.07404	1	0.99983	100
GOTERM_BP_FAT	GO:0006007~glucose catabolic process	7	0.238095	0.651452	CG30410, CG17333, CG12229, CG11249, CG5362, CG4747, CG15093	1203	43	7937	1.07404	1	0.99983	100
GOTERM_BP_FAT	GO:0046365~monosaccharide catabolic process	7	0.238095	0.674142	CG30410, CG17333, CG12229, CG11249, CG5362, CG4747, CG15093	1203	44	7937	1.04963	1	0.999887	100
GOTERM_BP_FAT	GO:0006006~glucose metabolic process	9	0.306122	0.724651	CG30410, CG17333, CG1516, CG12229, CG11249, CG5362, CG4747, BSK, CG15093	1203	61	7937	0.973427	1	0.999949	100
GOTERM_BP_FAT	GO:0016052~carbohydrate catabolic process	10	0.340136	0.899477	CG31169, CG30410, BIF, CG17333, CG12229, CG11249, CG5362, CG4747, CG33090, CG15093	1203	83	7937	0.7949	1	0.999999	100
GOTERM_BP_FAT	GO:0019748~secondary metabolic process	7	0.238095	0.97113	BW, CG30410, CG17333, CG4747, CAR, CA, CG15093	1203	72	7937	0.64144	1	1	100
GOTERM_BP_FAT	GO:0006096~glycolysis	3	0.102041	0.977089	CG12229, CG11249, CG5362	1203	35	7937	0.565515	1	1	100
Annotation Cluster 62	Enrichment Score: 0.4481101276608637
Category	Term	Count	%	PValue	Genes	List Total	Pop Hits	Pop Total	Fold Enrichment	Bonferroni	Benjamini	FDR
GOTERM_BP_FAT	GO:0007016~cytoskeletal anchoring at plasma membrane	5	0.170068	0.249866	ANK, BY, ALPHA-CAT, ACTN, ARM	1203	17	7937	1.94049	1	0.970297	99.3096
GOTERM_BP_FAT	GO:0045185~maintenance of protein location	8	0.272109	0.324299	ACT5C, CDC42, ANK, BY, CACT, ALPHA-CAT, ACTN, ARM	1203	37	7937	1.42652	1	0.988154	99.8868
GOTERM_BP_FAT	GO:0032507~maintenance of protein location in cell	7	0.238095	0.383127	ACT5C, ANK, BY, CACT, ALPHA-CAT, ACTN, ARM	1203	33	7937	1.39951	1	0.994422	99.9766
GOTERM_BP_FAT	GO:0051235~maintenance of location	9	0.306122	0.419988	ACT5C, CDC42, ANK, BY, CACT, ADP, ALPHA-CAT, ACTN, ARM	1203	47	7937	1.26338	1	0.996482	99.9919
GOTERM_BP_FAT	GO:0051651~maintenance of location in cell	7	0.238095	0.440774	ACT5C, ANK, BY, CACT, ALPHA-CAT, ACTN, ARM	1203	35	7937	1.31953	1	0.997446	99.9957
Annotation Cluster 63	Enrichment Score: 0.4369875252675866
Category	Term	Count	%	PValue	Genes	List Total	Pop Hits	Pop Total	Fold Enrichment	Bonferroni	Benjamini	FDR
GOTERM_MF_FAT	GO:0016791~phosphatase activity	42	1.42857	0.134196	CG14216, CANB2, ALPH, ACPH-1, CG6697, CG14903, CDC14, CG11883, CG16771, CG18473, CG17294, CG3626, CG12173, CG12746, 5PTASEI, CG10417, CG13197, CG15771, CG42271, CG12091, CG14212, CG5830, CG11597, CG12237, CG2862, CG10089, CG15912, CG34140, CG3573, CG14411, CG10376, CG1637, CG5567, CG15743, CG17598, CG6656, CG42327, CG17746, CG5026, CG3632, CG3530, CG3362	1510	182	7918	1.21009	1	0.901809	89.918
GOTERM_MF_FAT	GO:0008138~protein tyrosine/serine/threonine phosphatase activity	7	0.238095	0.19698	CG10089, CG34140, CDC14, CG5026, CG3632, CG3530, CG13197	1510	21	7918	1.7479	1	0.949697	96.9592
GOTERM_BP_FAT	GO:0016311~dephosphorylation	21	0.714286	0.207176	CG11597, CG10089, ALPH, CANB2, CG34140, CG3573, CG14903, CG14411, CDC14, CG10376, CG17598, CG42327, CG12746, 5PTASEI, CG17746, CG5026, CG10417, CG3632, CG3530, CG13197, CG42271	1203	109	7937	1.27111	1	0.950892	98.2007
GOTERM_BP_FAT	GO:0006470~protein amino acid dephosphorylation	15	0.510204	0.357185	CG11597, CG10089, ALPH, CANB2, CG34140, CG14903, CG10376, CDC14, CG42327, CG17598, CG17746, CG10417, CG3632, CG13197, CG3530	1203	82	7937	1.20689	1	0.992131	99.9523
GOTERM_MF_FAT	GO:0004721~phosphoprotein phosphatase activity	19	0.646259	0.572324	CG11597, CG14216, CG10089, ALPH, CANB2, CG34140, CG6697, CG14903, CDC14, CG10376, CG42327, CG17598, CG17746, CG5026, CG10417, CG3632, CG3530, CG13197, CG12091	1510	96	7918	1.03782	1	0.998559	99.9999
GOTERM_MF_FAT	GO:0004725~protein tyrosine phosphatase activity	7	0.238095	0.883131	CG42327, CG34140, CG14903, CDC14, CG3632, CG3530, CG13197	1510	45	7918	0.815688	1	0.999996	100
GOTERM_MF_FAT	GO:0004722~protein serine/threonine phosphatase activity	7	0.238095	0.883131	CG11597, CANB2, ALPH, CG17598, CG10376, CG10417, CG17746	1510	45	7918	0.815688	1	0.999996	100
Annotation Cluster 64	Enrichment Score: 0.43676505027942064
Category	Term	Count	%	PValue	Genes	List Total	Pop Hits	Pop Total	Fold Enrichment	Bonferroni	Benjamini	FDR
GOTERM_BP_FAT	GO:0006044~N-acetylglucosamine metabolic process	3	0.102041	0.347398	BETA4GALNACTB, BETA4GALNACTA, BOTV	1203	8	7937	2.47413	1	0.991157	99.938
GOTERM_BP_FAT	GO:0006041~glucosamine metabolic process	3	0.102041	0.347398	BETA4GALNACTB, BETA4GALNACTA, BOTV	1203	8	7937	2.47413	1	0.991157	99.938
GOTERM_BP_FAT	GO:0006040~amino sugar metabolic process	3	0.102041	0.405556	BETA4GALNACTB, BETA4GALNACTA, BOTV	1203	9	7937	2.19922	1	0.99558	99.9877
Annotation Cluster 65	Enrichment Score: 0.4207473775385925
Category	Term	Count	%	PValue	Genes	List Total	Pop Hits	Pop Total	Fold Enrichment	Bonferroni	Benjamini	FDR
GOTERM_BP_FAT	GO:0033014~tetrapyrrole biosynthetic process	4	0.136054	0.225485	ALAS, CG1885, CG5037, CG3156	1203	11	7937	2.39915	1	0.960741	98.7991
GOTERM_BP_FAT	GO:0033013~tetrapyrrole metabolic process	4	0.136054	0.269081	ALAS, CG1885, CG5037, CG3156	1203	12	7937	2.19922	1	0.976418	99.5594
GOTERM_BP_FAT	GO:0006783~heme biosynthetic process	3	0.102041	0.287435	ALAS, CG5037, CG3156	1203	7	7937	2.82757	1	0.981385	99.7163
GOTERM_BP_FAT	GO:0042168~heme metabolic process	3	0.102041	0.347398	ALAS, CG5037, CG3156	1203	8	7937	2.47413	1	0.991157	99.938
GOTERM_BP_FAT	GO:0006779~porphyrin biosynthetic process	3	0.102041	0.347398	ALAS, CG5037, CG3156	1203	8	7937	2.47413	1	0.991157	99.938
GOTERM_BP_FAT	GO:0006778~porphyrin metabolic process	3	0.102041	0.405556	ALAS, CG5037, CG3156	1203	9	7937	2.19922	1	0.99558	99.9877
GOTERM_BP_FAT	GO:0046148~pigment biosynthetic process	9	0.306122	0.628566	ALAS, BW, CAR, CG5037, CG3156, CA, ADE3, CG18143, APRT	1203	56	7937	1.06034	1	0.999793	100
GOTERM_BP_FAT	GO:0042440~pigment metabolic process	9	0.306122	0.802465	ALAS, BW, CAR, CG5037, CG3156, CA, ADE3, CG18143, APRT	1203	66	7937	0.899683	1	0.999986	100
Annotation Cluster 66	Enrichment Score: 0.3983889292146894
Category	Term	Count	%	PValue	Genes	List Total	Pop Hits	Pop Total	Fold Enrichment	Bonferroni	Benjamini	FDR
GOTERM_BP_FAT	GO:0030865~cortical cytoskeleton organization	4	0.136054	0.269081	CDC42, ARC-P20, ARC-P34, ABI	1203	12	7937	2.19922	1	0.976418	99.5594
GOTERM_BP_FAT	GO:0030866~cortical actin cytoskeleton organization	4	0.136054	0.269081	CDC42, ARC-P20, ARC-P34, ABI	1203	12	7937	2.19922	1	0.976418	99.5594
GOTERM_BP_FAT	GO:0030031~cell projection assembly	8	0.272109	0.881187	CDC42, ARC-P20, CG3259, CG1399, ARC-P34, ABI, CG13178, CG11048	1203	65	7937	0.812021	1	0.999998	100
Annotation Cluster 67	Enrichment Score: 0.38268415982071197
Category	Term	Count	%	PValue	Genes	List Total	Pop Hits	Pop Total	Fold Enrichment	Bonferroni	Benjamini	FDR
GOTERM_BP_FAT	GO:0033227~dsRNA transport	7	0.238095	0.166543	CG5053, CG5382, ARF72A, CG5161, AP-50, AGO2, CG4572	1203	25	7937	1.84735	1	0.923454	95.7266
GOTERM_BP_FAT	GO:0015931~nucleobase, nucleoside, nucleotide and nucleic acid transport	13	0.442177	0.329844	CG5053, CG10320, ARF72A, CG5161, CG5857, CG14749, CG4572, CG5382, CG32135, AGO2, AP-50, ANT2, BICD	1203	68	7937	1.26132	1	0.988945	99.9019
GOTERM_BP_FAT	GO:0050658~RNA transport	12	0.408163	0.354247	CG5053, CG10320, CG5382, ARF72A, CG32135, CG5161, AP-50, AGO2, CG5857, BICD, CG14749, CG4572	1203	63	7937	1.2567	1	0.991932	99.9484
GOTERM_BP_FAT	GO:0050657~nucleic acid transport	12	0.408163	0.354247	CG5053, CG10320, CG5382, ARF72A, CG32135, CG5161, AP-50, AGO2, CG5857, BICD, CG14749, CG4572	1203	63	7937	1.2567	1	0.991932	99.9484
GOTERM_BP_FAT	GO:0051236~establishment of RNA localization	12	0.408163	0.37471	CG5053, CG10320, CG5382, ARF72A, CG32135, CG5161, AP-50, AGO2, CG5857, BICD, CG14749, CG4572	1203	64	7937	1.23706	1	0.993712	99.9704
GOTERM_BP_FAT	GO:0051028~mRNA transport	4	0.136054	0.882961	CG32135, CG5857, BICD, CG14749	1203	32	7937	0.824709	1	0.999998	100
GOTERM_BP_FAT	GO:0006403~RNA localization	15	0.510204	0.918601	CG5053, BLUE, CAPU, CG10320, ARF72A, CG5161, CG5857, CG14749, CG4572, CG5382, CG32135, AGO2, AP-50, BTZ, BICD	1203	125	7937	0.791721	1	0.999999	100
Annotation Cluster 68	Enrichment Score: 0.3716794086891082
Category	Term	Count	%	PValue	Genes	List Total	Pop Hits	Pop Total	Fold Enrichment	Bonferroni	Benjamini	FDR
GOTERM_MF_FAT	GO:0033293~monocarboxylic acid binding	6	0.204082	0.174135	CG11198, CG1516, CG33713, CG14232, CG17896, CG2118	1510	16	7918	1.96639	1	0.933576	95.247
GOTERM_MF_FAT	GO:0000062~acyl-CoA binding	3	0.102041	0.595217	CG33713, CG14232, CG17896	1510	10	7918	1.57311	1	0.998958	99.9999
GOTERM_MF_FAT	GO:0005504~fatty acid binding	3	0.102041	0.740287	CG33713, CG14232, CG17896	1510	13	7918	1.21009	1	0.999856	100
Annotation Cluster 69	Enrichment Score: 0.36909892476295864
Category	Term	Count	%	PValue	Genes	List Total	Pop Hits	Pop Total	Fold Enrichment	Bonferroni	Benjamini	FDR
GOTERM_MF_FAT	GO:0016715~oxidoreductase activity, acting on paired donors, with incorporation or reduction of molecular oxygen, reduced ascorbate as one donor, and incorporation of one atom of oxygen	4	0.136054	0.293887	CG5235, CG14681, CG34355, CG12130	1510	10	7918	2.09748	1	0.978787	99.6077
GOTERM_BP_FAT	GO:0009077~histidine family amino acid catabolic process	3	0.102041	0.347398	CG5235, CG14681, CG34355	1203	8	7937	2.47413	1	0.991157	99.938
GOTERM_BP_FAT	GO:0006548~histidine catabolic process	3	0.102041	0.347398	CG5235, CG14681, CG34355	1203	8	7937	2.47413	1	0.991157	99.938
GOTERM_BP_FAT	GO:0009063~cellular amino acid catabolic process	7	0.238095	0.383127	CG5235, CG3626, CG6415, CG14681, CG3267, CG34355, CG6638	1203	33	7937	1.39951	1	0.994422	99.9766
GOTERM_BP_FAT	GO:0006547~histidine metabolic process	3	0.102041	0.405556	CG5235, CG14681, CG34355	1203	9	7937	2.19922	1	0.99558	99.9877
GOTERM_BP_FAT	GO:0009075~histidine family amino acid metabolic process	3	0.102041	0.405556	CG5235, CG14681, CG34355	1203	9	7937	2.19922	1	0.99558	99.9877
GOTERM_BP_FAT	GO:0009310~amine catabolic process	7	0.238095	0.469239	CG5235, CG3626, CG6415, CG14681, CG3267, CG34355, CG6638	1203	36	7937	1.28288	1	0.99815	99.9983
GOTERM_MF_FAT	GO:0004500~dopamine beta-monooxygenase activity	3	0.102041	0.534951	CG5235, CG14681, CG34355	1510	9	7918	1.7479	1	0.997697	99.9995
GOTERM_BP_FAT	GO:0046700~heterocycle catabolic process	3	0.102041	0.849419	CG5235, CG14681, CG34355	1203	21	7937	0.942525	1	0.999995	100
Annotation Cluster 70	Enrichment Score: 0.3561850076675658
Category	Term	Count	%	PValue	Genes	List Total	Pop Hits	Pop Total	Fold Enrichment	Bonferroni	Benjamini	FDR
GOTERM_BP_FAT	GO:0016337~cell-cell adhesion	12	0.408163	0.274796	BRN, APC2, BIB, CAD96CA, CAD87A, ALPHA-SPEC, CAT, ALPHAPS5, ARM, CALS, CAD99C, CAD74A	1203	59	7937	1.3419	1	0.977589	99.6154
GOTERM_BP_FAT	GO:0007155~cell adhesion	28	0.952381	0.477799	CG31004, APC2, BIB, CAD87A, CG11637, CG14394, CALS, CAD99C, 18W, CAD96CA, BOI, CAT, CG32666, CG3829, CDK9, ALPHA-SPEC, CG34213, ANXB11, ARF79F, ALPHAPS5, ARM, BM-40-SPARC, CG17471, BRN, ALPHA-CAT, ABI, CG12007, CAD74A	1203	174	7937	1.06169	1	0.998378	99.9987
GOTERM_BP_FAT	GO:0022610~biological adhesion	28	0.952381	0.650412	CG31004, APC2, BIB, CAD87A, CG11637, CG14394, CALS, CAD99C, 18W, CAD96CA, BOI, CAT, CG32666, CG3829, CDK9, ALPHA-SPEC, CG34213, ANXB11, ARF79F, ALPHAPS5, ARM, BM-40-SPARC, CG17471, BRN, ALPHA-CAT, ABI, CG12007, CAD74A	1203	188	7937	0.982632	1	0.999831	100
Annotation Cluster 71	Enrichment Score: 0.34576755356742017
Category	Term	Count	%	PValue	Genes	List Total	Pop Hits	Pop Total	Fold Enrichment	Bonferroni	Benjamini	FDR
GOTERM_MF_FAT	GO:0015651~quaternary ammonium group transmembrane transporter activity	3	0.102041	0.321489	CG4630, CG3790, CG3476	1510	6	7918	2.62185	1	0.983128	99.7921
GOTERM_MF_FAT	GO:0015226~carnitine transporter activity	3	0.102041	0.321489	CG4630, CG3790, CG3476	1510	6	7918	2.62185	1	0.983128	99.7921
GOTERM_MF_FAT	GO:0051183~vitamin transporter activity	3	0.102041	0.397235	CG4630, CG3790, CG3476	1510	7	7918	2.2473	1	0.991453	99.9684
GOTERM_MF_FAT	GO:0051184~cofactor transporter activity	4	0.136054	0.46332	CG4630, CG3790, CG4743, CG3476	1510	13	7918	1.61345	1	0.995385	99.995
GOTERM_MF_FAT	GO:0015101~organic cation transmembrane transporter activity	4	0.136054	0.981525	CG4630, CG4324, CG3790, CG3476	1510	37	7918	0.566887	1	1	100
Annotation Cluster 72	Enrichment Score: 0.3426574762426877
Category	Term	Count	%	PValue	Genes	List Total	Pop Hits	Pop Total	Fold Enrichment	Bonferroni	Benjamini	FDR
GOTERM_BP_FAT	GO:0048134~germ-line cyst formation	5	0.170068	0.396064	BOL, CDC2, ALPHA-SPEC, BGCN, BICD	1203	21	7937	1.57087	1	0.995052	99.9838
GOTERM_BP_FAT	GO:0030727~germarium-derived female germ-line cyst formation	3	0.102041	0.46108	CDC2, ALPHA-SPEC, BICD	1203	10	7937	1.9793	1	0.997969	99.9977
GOTERM_BP_FAT	GO:0048135~female germ-line cyst formation	3	0.102041	0.513435	CDC2, ALPHA-SPEC, BICD	1203	11	7937	1.79937	1	0.998858	99.9996
Annotation Cluster 73	Enrichment Score: 0.33357691796363437
Category	Term	Count	%	PValue	Genes	List Total	Pop Hits	Pop Total	Fold Enrichment	Bonferroni	Benjamini	FDR
GOTERM_MF_FAT	GO:0005525~GTP binding	37	1.2585	0.37391	CG10914, CG13375, ARF72A, CG4567, CG15684, CG6195, CG12413, ALPHATUB84B, CG13390, CG17273, CG18528, CG2219, CG1354, BETATUB97EF, ALPHATUB84D, AWD, 128UP, CDC42, CG1129, BETATUB85D, CG33158, CG4789, CG5116, CG2017, CG10628, CG30054, ARF79F, ATL, CG11376, CG17141, CG4849, CG34104, ARF102F, ARF51F, ARF84F, CG12736, BETATUB56D	1510	178	7918	1.08998	1	0.989166	99.9422
GOTERM_MF_FAT	GO:0032561~guanyl ribonucleotide binding	37	1.2585	0.416623	CG10914, CG13375, ARF72A, CG4567, CG15684, CG6195, CG12413, ALPHATUB84B, CG13390, CG17273, CG18528, CG2219, CG1354, BETATUB97EF, ALPHATUB84D, AWD, 128UP, CDC42, CG1129, BETATUB85D, CG33158, CG4789, CG5116, CG2017, CG10628, CG30054, ARF79F, ATL, CG11376, CG17141, CG4849, CG34104, ARF102F, ARF51F, ARF84F, CG12736, BETATUB56D	1510	181	7918	1.07192	1	0.992526	99.9812
GOTERM_MF_FAT	GO:0019001~guanyl nucleotide binding	37	1.2585	0.430992	CG10914, CG13375, ARF72A, CG4567, CG15684, CG6195, CG12413, ALPHATUB84B, CG13390, CG17273, CG18528, CG2219, CG1354, BETATUB97EF, ALPHATUB84D, AWD, 128UP, CDC42, CG1129, BETATUB85D, CG33158, CG4789, CG5116, CG2017, CG10628, CG30054, ARF79F, ATL, CG11376, CG17141, CG4849, CG34104, ARF102F, ARF51F, ARF84F, CG12736, BETATUB56D	1510	182	7918	1.06603	1	0.993777	99.9874
GOTERM_MF_FAT	GO:0003924~GTPase activity	24	0.816327	0.689783	CG13375, CG2017, ARF72A, CG4567, CG12413, ALPHATUB84B, CG18528, ARF79F, ATL, CG2219, BETATUB97EF, ALPHATUB84D, CG3004, CDC42, BETATUB85D, CG33158, CG4849, ARF102F, CG34104, ARF51F, CG17766, CG12736, ARF84F, BETATUB56D	1510	130	7918	0.968069	1	0.99969	100
Annotation Cluster 74	Enrichment Score: 0.3178699291558916
Category	Term	Count	%	PValue	Genes	List Total	Pop Hits	Pop Total	Fold Enrichment	Bonferroni	Benjamini	FDR
GOTERM_BP_FAT	GO:0048102~autophagic cell death	17	0.578231	0.0442928	AKAP200, ATG12, BR, CG4091, CG16708, CG6194, CG14995, CG3829, CATHD, CG10992, ARK, BUN, BIGMAX, ATG5, ATG6, AGO2, CBT	1203	68	7937	1.64942	1	0.584998	54.3443
GOTERM_BP_FAT	GO:0035070~salivary gland histolysis	17	0.578231	0.0442928	AKAP200, ATG12, BR, CG4091, CG16708, CG6194, CG14995, CG3829, CATHD, CG10992, ARK, BUN, BIGMAX, ATG5, ATG6, AGO2, CBT	1203	68	7937	1.64942	1	0.584998	54.3443
GOTERM_BP_FAT	GO:0035071~salivary gland cell autophagic cell death	17	0.578231	0.0442928	AKAP200, ATG12, BR, CG4091, CG16708, CG6194, CG14995, CG3829, CATHD, CG10992, ARK, BUN, BIGMAX, ATG5, ATG6, AGO2, CBT	1203	68	7937	1.64942	1	0.584998	54.3443
GOTERM_BP_FAT	GO:0016271~tissue death	17	0.578231	0.0559435	AKAP200, ATG12, BR, CG4091, CG16708, CG6194, CG14995, CG3829, CATHD, CG10992, ARK, BUN, BIGMAX, ATG5, ATG6, AGO2, CBT	1203	70	7937	1.60229	1	0.653293	63.0763
GOTERM_BP_FAT	GO:0007559~histolysis	17	0.578231	0.0559435	AKAP200, ATG12, BR, CG4091, CG16708, CG6194, CG14995, CG3829, CATHD, CG10992, ARK, BUN, BIGMAX, ATG5, ATG6, AGO2, CBT	1203	70	7937	1.60229	1	0.653293	63.0763
GOTERM_BP_FAT	GO:0012501~programmed cell death	29	0.986395	0.161696	CG13850, ATG12, AAC11, BR, CG4091, CG6194, CG14995, BRUCE, CATHD, CG13393, ALG-2, ABD-A, AKT1, ATG5, BG4, ATG6, AGO2, ABS, ALIX, CG31643, AKAP200, CG16708, CG3829, CG10992, ARK, BUN, ARM, BIGMAX, CBT	1203	153	7937	1.25054	1	0.919675	95.2755
GOTERM_BP_FAT	GO:0008219~cell death	30	1.02041	0.188244	CG13850, ATG12, AAC11, BR, CG4091, CG6194, CG14995, BRUCE, CATHD, CG13393, ALG-2, ABD-A, AKT1, ATG5, BG4, ATG6, AGO2, ABS, ALIX, CG31643, AKAP200, CG16708, CG3829, CG10992, ARK, BUN, ARM, BIGMAX, CG4615, CBT	1203	162	7937	1.22179	1	0.940921	97.293
GOTERM_BP_FAT	GO:0016265~death	30	1.02041	0.197745	CG13850, ATG12, AAC11, BR, CG4091, CG6194, CG14995, BRUCE, CATHD, CG13393, ALG-2, ABD-A, AKT1, ATG5, BG4, ATG6, AGO2, ABS, ALIX, CG31643, AKAP200, CG16708, CG3829, CG10992, ARK, BUN, ARM, BIGMAX, CG4615, CBT	1203	163	7937	1.2143	1	0.946719	97.792
GOTERM_BP_FAT	GO:0022612~gland morphogenesis	18	0.612245	0.568329	AKAP200, ATG12, CG4091, BR, CG16708, CG6194, CG14995, CG3829, CATHD, CG10992, ARK, BUN, BIGMAX, BTK29A, ATG5, ATG6, AGO2, CBT	1203	114	7937	1.04174	1	0.999481	100
GOTERM_BP_FAT	GO:0007435~salivary gland morphogenesis	18	0.612245	0.568329	AKAP200, ATG12, CG4091, BR, CG16708, CG6194, CG14995, CG3829, CATHD, CG10992, ARK, BUN, BIGMAX, BTK29A, ATG5, ATG6, AGO2, CBT	1203	114	7937	1.04174	1	0.999481	100
GOTERM_BP_FAT	GO:0035272~exocrine system development	21	0.714286	0.635497	ABD-B, BTHD, AKAP200, ATG12, CG4091, BR, CG16708, CG6194, CG14995, CG3829, CATHD, CG10992, ARK, BUN, BIGMAX, BTK29A, ATG5, BRK, ATG6, AGO2, CBT	1203	139	7937	0.996771	1	0.999798	100
GOTERM_BP_FAT	GO:0007431~salivary gland development	21	0.714286	0.635497	ABD-B, BTHD, AKAP200, ATG12, CG4091, BR, CG16708, CG6194, CG14995, CG3829, CATHD, CG10992, ARK, BUN, BIGMAX, BTK29A, ATG5, BRK, ATG6, AGO2, CBT	1203	139	7937	0.996771	1	0.999798	100
GOTERM_BP_FAT	GO:0006915~apoptosis	11	0.37415	0.748751	ABS, CG13850, AKT1, CG31643, ALIX, AAC11, BG4, CG13393, ARK, ALG-2, ABD-A	1203	77	7937	0.942525	1	0.999967	100
GOTERM_BP_FAT	GO:0048732~gland development	21	0.714286	0.8758	ABD-B, BTHD, AKAP200, ATG12, CG4091, BR, CG16708, CG6194, CG14995, CG3829, CATHD, CG10992, ARK, BUN, BIGMAX, BTK29A, ATG5, BRK, ATG6, AGO2, CBT	1203	163	7937	0.850007	1	0.999998	100
GOTERM_BP_FAT	GO:0048707~instar larval or pupal morphogenesis	32	1.08844	0.999835	BY, ATG12, ALPH, BR, CG4091, CG6194, CG14995, CATHD, CCT1, BABO, CDC42, BI, ATG5, BOWL, ATG6, AGO2, AKAP200, CG16708, CG3829, CG10992, AXN, ARK, BUN, ARM, BSK, BIGMAX, C15, BRM, CG, BRK, ASH2, CBT	1203	347	7937	0.608431	1	1	100
GOTERM_BP_FAT	GO:0009886~post-embryonic morphogenesis	32	1.08844	0.999899	BY, ATG12, ALPH, BR, CG4091, CG6194, CG14995, CATHD, CCT1, BABO, CDC42, BI, ATG5, BOWL, ATG6, AGO2, AKAP200, CG16708, CG3829, CG10992, AXN, ARK, BUN, ARM, BSK, BIGMAX, C15, BRM, CG, BRK, ASH2, CBT	1203	353	7937	0.598089	1	1	100
GOTERM_BP_FAT	GO:0007552~metamorphosis	32	1.08844	0.999952	BY, ATG12, ALPH, BR, CG4091, CG6194, CG14995, CATHD, CCT1, BABO, CDC42, BI, ATG5, BOWL, ATG6, AGO2, AKAP200, CG16708, CG3829, CG10992, AXN, ARK, BUN, ARM, BSK, BIGMAX, C15, BRM, CG, BRK, ASH2, CBT	1203	362	7937	0.58322	1	1	100
GOTERM_BP_FAT	GO:0002165~instar larval or pupal development	38	1.29252	0.999968	BLP, BY, ATG12, APC2, ALPH, CG4091, BR, CG14995, CG6194, CATHD, CCT1, BABO, ART4, CDC42, BI, ATG5, BOWL, ATG6, AGO2, ALH, AKAP200, CG16708, CG3829, ALPHA-SPEC, CG10992, AXN, ARK, BUN, ARM, BSK, BIGMAX, C15, BRM, CG, BRK, ASH2, CBT, BEL	1203	418	7937	0.599788	1	1	100
GOTERM_BP_FAT	GO:0009791~post-embryonic development	39	1.32653	0.999983	BLP, BY, ATG12, APC2, ALPH, CG4091, BR, CG14995, CG6194, CATHD, CCT1, BABO, ART4, CDC42, BI, ATG5, BOWL, ATG6, AGO2, ATP7, ALH, AKAP200, CG16708, CG3829, ALPHA-SPEC, CG10992, AXN, ARK, BUN, ARM, BSK, BIGMAX, C15, BRM, CG, BRK, ASH2, CBT, BEL	1203	434	7937	0.592878	1	1	100
GOTERM_BP_FAT	GO:0035220~wing disc development	20	0.680272	0.999996	BY, CAPT, ALPH, CG14073, CCT1, BABO, ARM, CAD99C, CG1943, BRM, ANNIX, CDC42, CG, BI, BOWL, BRK, CG11399, ASH2, CBT, 14-3-3EPSILON	1203	281	7937	0.469585	1	1	100
GOTERM_BP_FAT	GO:0007444~imaginal disc development	33	1.12245	0.999999	ABD-B, BY, CAPT, ALPH, APC2, CCT1, BABO, BX42, ABD-A, CAD99C, ANNIX, CDC42, BI, BOWL, BBG, BL, 14-3-3EPSILON, ALH, B4, CG14073, AXN, ARM, BSK, CG1943, C15, BTK29A, BRM, BOCA, CG, BRK, CG11399, ASH2, CBT	1203	412	7937	0.528454	1	1	100
GOTERM_BP_FAT	GO:0048736~appendage development	15	0.510204	0.999999	BY, ALPH, CCT1, BABO, ARM, C15, BRM, CDC42, CG, BI, BOWL, BRK, ASH2, BL, ALH	1203	246	7937	0.402297	1	1	100
GOTERM_BP_FAT	GO:0035107~appendage morphogenesis	14	0.47619	1	BY, ALPH, CCT1, BABO, ARM, C15, BRM, CDC42, CG, BI, BOWL, BRK, ASH2, BL	1203	242	7937	0.381684	1	1	100
GOTERM_BP_FAT	GO:0048737~imaginal disc-derived appendage development	14	0.47619	1	BY, ALPH, CCT1, BABO, ARM, C15, BRM, CDC42, CG, BI, BOWL, BRK, ASH2, ALH	1203	243	7937	0.380113	1	1	100
GOTERM_BP_FAT	GO:0035114~imaginal disc-derived appendage morphogenesis	13	0.442177	1	BY, ALPH, CCT1, BABO, ARM, C15, BRM, CDC42, CG, BI, BOWL, BRK, ASH2	1203	239	7937	0.358869	1	1	100
GOTERM_BP_FAT	GO:0035120~post-embryonic appendage morphogenesis	12	0.408163	1	BRM, CDC42, CG, BY, BI, ALPH, BOWL, BRK, CCT1, BABO, ASH2, ARM	1203	229	7937	0.34573	1	1	100
GOTERM_BP_FAT	GO:0007476~imaginal disc-derived wing morphogenesis	11	0.37415	1	BRM, CDC42, CG, BY, BI, ALPH, BRK, CCT1, BABO, ASH2, ARM	1203	218	7937	0.33291	1	1	100
GOTERM_BP_FAT	GO:0007472~wing disc morphogenesis	11	0.37415	1	BRM, CDC42, CG, BY, BI, ALPH, BRK, CCT1, BABO, ASH2, ARM	1203	220	7937	0.329884	1	1	100
GOTERM_BP_FAT	GO:0007560~imaginal disc morphogenesis	15	0.510204	1	BY, ALPH, CCT1, BABO, AXN, ARM, BSK, C15, BRM, CDC42, CG, BI, BOWL, BRK, ASH2	1203	284	7937	0.348469	1	1	100
GOTERM_BP_FAT	GO:0048563~post-embryonic organ morphogenesis	15	0.510204	1	BY, ALPH, CCT1, BABO, AXN, ARM, BSK, C15, BRM, CDC42, CG, BI, BOWL, BRK, ASH2	1203	284	7937	0.348469	1	1	100
GOTERM_BP_FAT	GO:0048569~post-embryonic organ development	15	0.510204	1	BY, ALPH, CCT1, BABO, AXN, ARM, BSK, C15, BRM, CDC42, CG, BI, BOWL, BRK, ASH2	1203	297	7937	0.333216	1	1	100
Annotation Cluster 75	Enrichment Score: 0.3081345845655459
Category	Term	Count	%	PValue	Genes	List Total	Pop Hits	Pop Total	Fold Enrichment	Bonferroni	Benjamini	FDR
GOTERM_MF_FAT	GO:0051540~metal cluster binding	12	0.408163	0.377326	CG3420, CG17904, CG1458, CG6550, CG4199, CG18011, CG6345, ACON, CG1319, CG13623, CG4078, CG4858	1510	51	7918	1.23381	1	0.988849	99.947
GOTERM_MF_FAT	GO:0051536~iron-sulfur cluster binding	12	0.408163	0.377326	CG3420, CG17904, CG1458, CG6550, CG4199, CG18011, CG6345, ACON, CG1319, CG13623, CG4078, CG4858	1510	51	7918	1.23381	1	0.988849	99.947
GOTERM_MF_FAT	GO:0051539~4 iron, 4 sulfur cluster binding	5	0.170068	0.627143	CG17904, CG6550, CG6345, ACON, CG4858	1510	22	7918	1.19175	1	0.999313	100
GOTERM_MF_FAT	GO:0051537~2 iron, 2 sulfur cluster binding	4	0.136054	0.655635	CG3420, CG1458, CG4199, CG1319	1510	17	7918	1.23381	1	0.999527	100
Annotation Cluster 76	Enrichment Score: 0.30013764477506577
Category	Term	Count	%	PValue	Genes	List Total	Pop Hits	Pop Total	Fold Enrichment	Bonferroni	Benjamini	FDR
GOTERM_BP_FAT	GO:0016246~RNA interference	8	0.272109	0.157807	CG5060, ARMI, AGO1, CBP80, AGO2, CBP20, BEL, CG17265	1203	30	7937	1.75938	1	0.915602	94.8815
GOTERM_BP_FAT	GO:0016441~posttranscriptional gene silencing	9	0.306122	0.252075	CG5060, ARMI, AGO1, CBP80, AGO2, AGO3, CBP20, BEL, CG17265	1203	40	7937	1.48448	1	0.970759	99.3439
GOTERM_BP_FAT	GO:0035194~posttranscriptional gene silencing by RNA	9	0.306122	0.252075	CG5060, ARMI, AGO1, CBP80, AGO2, AGO3, CBP20, BEL, CG17265	1203	40	7937	1.48448	1	0.970759	99.3439
GOTERM_BP_FAT	GO:0031047~gene silencing by RNA	9	0.306122	0.370878	CG5060, ARMI, AGO1, CBP80, AGO2, AGO3, CBP20, BEL, CG17265	1203	45	7937	1.31953	1	0.993453	99.9671
GOTERM_BP_FAT	GO:0010608~posttranscriptional regulation of gene expression	20	0.680272	0.546862	ADAM, CG17737, CG5060, 14-3-3ZETA, CBP80, CG17265, ALIEN, BAP170, CG33649, BOL, ARMI, CG13163, AGO1, AGO2, AGO3, CBP20, BRAT, CG10306, BEL, BRU-2	1203	126	7937	1.04725	1	0.99929	99.9999
GOTERM_BP_FAT	GO:0040029~regulation of gene expression, epigenetic	18	0.612245	0.980224	CG5060, CBP80, CG17265, BRM, ASX, ARMI, AGO1, CAF1, AGO2, AGO3, BKA, CG2051, ASH1, ASH2, CBP20, BIN1, CG14478, BEL	1203	169	7937	0.702711	1	1	100
GOTERM_BP_FAT	GO:0016458~gene silencing	13	0.442177	0.998284	CG5060, CBP80, CG17265, ASX, ARMI, CAF1, AGO1, AGO2, AGO3, CG2051, CBP20, BIN1, BEL	1203	155	7937	0.553353	1	1	100
GOTERM_BP_FAT	GO:0010629~negative regulation of gene expression	22	0.748299	0.999746	CG14907, APC2, CG14906, CG5060, CBP80, AEF1, CG17265, ALIEN, ASX, BOWL, CG31716, BRK, ARMI, AGO1, CAF1, AGO2, AGO3, CG2051, CBP20, BIN1, ABO, BEL, BRD8	1203	256	7937	0.566987	1	1	100
GOTERM_BP_FAT	GO:0010605~negative regulation of macromolecule metabolic process	24	0.816327	0.999996	APC2, CG14907, CG14906, CG5060, BOWL, CAF1, AGO1, AGO2, AGO3, CG2051, CBP20, BRD8, CBP80, AEF1, CG17265, ALIEN, ASX, CG31716, ARMI, BRK, BIN1, CG10336, ABO, BEL, BRU-2	1203	317	7937	0.499508	1	1	100
Annotation Cluster 77	Enrichment Score: 0.2816517570363385
Category	Term	Count	%	PValue	Genes	List Total	Pop Hits	Pop Total	Fold Enrichment	Bonferroni	Benjamini	FDR
GOTERM_MF_FAT	GO:0034480~phosphatidylcholine phospholipase C activity	3	0.102041	0.321489	CG11619, CG10747, CG2818	1510	6	7918	2.62185	1	0.983128	99.7921
GOTERM_MF_FAT	GO:0004629~phospholipase C activity	3	0.102041	0.534951	CG11619, CG10747, CG2818	1510	9	7918	1.7479	1	0.997697	99.9995
GOTERM_MF_FAT	GO:0008081~phosphoric diester hydrolase activity	5	0.170068	0.83093	CG11619, CG10747, CG12034, CG2818, CG3376	1510	29	7918	0.904088	1	0.999981	100
Annotation Cluster 78	Enrichment Score: 0.26427987320743423
Category	Term	Count	%	PValue	Genes	List Total	Pop Hits	Pop Total	Fold Enrichment	Bonferroni	Benjamini	FDR
GOTERM_BP_FAT	GO:0044272~sulfur compound biosynthetic process	7	0.238095	0.190563	CG12173, BETA4GALT7, CG1753, CG32068, CG12913, BOTV, CG14721	1203	26	7937	1.7763	1	0.942121	97.4238
GOTERM_BP_FAT	GO:0006024~glycosaminoglycan biosynthetic process	4	0.136054	0.269081	CG3194, BETA4GALT7, CG12913, BOTV	1203	12	7937	2.19922	1	0.976418	99.5594
GOTERM_BP_FAT	GO:0006023~aminoglycan biosynthetic process	4	0.136054	0.402106	CG3194, BETA4GALT7, CG12913, BOTV	1203	15	7937	1.75938	1	0.995428	99.9864
GOTERM_BP_FAT	GO:0000271~polysaccharide biosynthetic process	5	0.170068	0.432516	CG3194, BETA4GALT7, CG12913, BSK, BOTV	1203	22	7937	1.49947	1	0.997114	99.9945
GOTERM_BP_FAT	GO:0016051~carbohydrate biosynthetic process	9	0.306122	0.628566	CG3194, CG1516, BETA4GALT7, CG10688, CG4542, CG12913, CG31743, BSK, BOTV	1203	56	7937	1.06034	1	0.999793	100
GOTERM_BP_FAT	GO:0030166~proteoglycan biosynthetic process	3	0.102041	0.68714	BETA4GALT7, CG12913, BOTV	1203	15	7937	1.31953	1	0.999903	100
GOTERM_BP_FAT	GO:0006029~proteoglycan metabolic process	3	0.102041	0.721691	BETA4GALT7, CG12913, BOTV	1203	16	7937	1.23706	1	0.999949	100
GOTERM_BP_FAT	GO:0030203~glycosaminoglycan metabolic process	4	0.136054	0.818837	CG3194, BETA4GALT7, CG12913, BOTV	1203	28	7937	0.942525	1	0.99999	100
GOTERM_BP_FAT	GO:0005976~polysaccharide metabolic process	8	0.272109	0.999993	CG3194, CG34220, BETA4GALT7, CG13676, CG12913, CG15313, BSK, BOTV	1203	153	7937	0.344976	1	1	100
GOTERM_BP_FAT	GO:0006022~aminoglycan metabolic process	7	0.238095	0.999993	CG3194, CG34220, BETA4GALT7, CG13676, CG12913, CG15313, BOTV	1203	142	7937	0.325237	1	1	100
Annotation Cluster 79	Enrichment Score: 0.2622536452411039
Category	Term	Count	%	PValue	Genes	List Total	Pop Hits	Pop Total	Fold Enrichment	Bonferroni	Benjamini	FDR
GOTERM_BP_FAT	GO:0030071~regulation of mitotic metaphase/anaphase transition	6	0.204082	0.202783	BUB1, ALPHATUB84B, BUBR1, CDC23, CDC16, CG11419, BUB3	1203	21	7937	1.88505	1	0.949133	98.0201
GOTERM_BP_FAT	GO:0000090~mitotic anaphase	4	0.136054	0.269081	CANA, CDC23, CDC16, CG11419	1203	12	7937	2.19922	1	0.976418	99.5594
GOTERM_BP_FAT	GO:0051322~anaphase	4	0.136054	0.402106	CANA, CDC23, CDC16, CG11419	1203	15	7937	1.75938	1	0.995428	99.9864
GOTERM_BP_FAT	GO:0007093~mitotic cell cycle checkpoint	4	0.136054	0.445282	BUB1, ALPHATUB84B, BUBR1, BUB3, 14-3-3EPSILON	1203	16	7937	1.64942	1	0.99758	99.9963
GOTERM_BP_FAT	GO:0051783~regulation of nuclear division	8	0.272109	0.456071	AGO, BUB1, ALPHATUB84B, BUBR1, CDC23, CDC16, CG11419, BUB3, 14-3-3EPSILON	1203	42	7937	1.2567	1	0.997899	99.9974
GOTERM_BP_FAT	GO:0007088~regulation of mitosis	8	0.272109	0.456071	AGO, BUB1, ALPHATUB84B, BUBR1, CDC23, CDC16, CG11419, BUB3, 14-3-3EPSILON	1203	42	7937	1.2567	1	0.997899	99.9974
GOTERM_BP_FAT	GO:0007094~mitotic cell cycle spindle assembly checkpoint	3	0.102041	0.46108	BUB1, ALPHATUB84B, BUBR1, BUB3	1203	10	7937	1.9793	1	0.997969	99.9977
GOTERM_BP_FAT	GO:0031577~spindle checkpoint	3	0.102041	0.46108	BUB1, ALPHATUB84B, BUBR1, BUB3	1203	10	7937	1.9793	1	0.997969	99.9977
GOTERM_BP_FAT	GO:0033043~regulation of organelle organization	18	0.612245	0.48855	ARP14D, ALPHATUB84B, CDC23, ALPHA-SPEC, ARC-P34, CDC16, ADA2B, BETA-SPEC, ATAC1, BTK29A, AGO, ARPC3A, BUB1, BUBR1, ATX2, CG11419, ARP66B, BUB3, 14-3-3EPSILON	1203	109	7937	1.08952	1	0.998464	99.9991
GOTERM_BP_FAT	GO:0000075~cell cycle checkpoint	5	0.170068	0.50329	BUB1, ALPHATUB84B, BUBR1, CG10336, BUB3, 14-3-3EPSILON	1203	24	7937	1.37452	1	0.998653	99.9994
GOTERM_BP_FAT	GO:0045841~negative regulation of mitotic metaphase/anaphase transition	3	0.102041	0.513435	BUB1, ALPHATUB84B, BUBR1, BUB3	1203	11	7937	1.79937	1	0.998858	99.9996
GOTERM_BP_FAT	GO:0051784~negative regulation of nuclear division	3	0.102041	0.607546	BUB1, ALPHATUB84B, BUBR1, BUB3	1203	13	7937	1.52254	1	0.99971	100
GOTERM_BP_FAT	GO:0045839~negative regulation of mitosis	3	0.102041	0.607546	BUB1, ALPHATUB84B, BUBR1, BUB3	1203	13	7937	1.52254	1	0.99971	100
GOTERM_BP_FAT	GO:0051726~regulation of cell cycle	24	0.816327	0.712566	ALPHATUB84B, BABO, CDC16, CG6191, AGO, CDC45L, BOL, CAF1, BUB1, BUBR1, BRAT, CG6345, CG11419, BUB3, 14-3-3EPSILON, CDC2, CDC23, CDK7, CDK4, ASF1, AC, BJ1, CDC2C, CG10336, CG30291	1203	166	7937	0.95388	1	0.999939	100
GOTERM_BP_FAT	GO:0010639~negative regulation of organelle organization	5	0.170068	0.816314	BUB1, ALPHATUB84B, BUBR1, ALPHA-SPEC, BETA-SPEC, BUB3	1203	36	7937	0.916343	1	0.99999	100
GOTERM_BP_FAT	GO:0007346~regulation of mitotic cell cycle	13	0.442177	0.827695	ALPHATUB84B, CDC23, BABO, CDC16, AC, AGO, CDC45L, BJ1, BUB1, CAF1, BUBR1, CG11419, BUB3, 14-3-3EPSILON	1203	98	7937	0.875201	1	0.999992	100
GOTERM_BP_FAT	GO:0010948~negative regulation of cell cycle process	3	0.102041	0.829162	BUB1, ALPHATUB84B, BUBR1, BUB3	1203	20	7937	0.989651	1	0.999992	100
GOTERM_BP_FAT	GO:0010564~regulation of cell cycle process	11	0.37415	0.837975	AGO, CDC45L, BOL, BUB1, ALPHATUB84B, BUBR1, CDC23, CDC16, CG10336, CG11419, BUB3, 14-3-3EPSILON	1203	84	7937	0.863981	1	0.999993	100
GOTERM_BP_FAT	GO:0045786~negative regulation of cell cycle	3	0.102041	0.897728	BUB1, ALPHATUB84B, BUBR1, BUB3	1203	24	7937	0.824709	1	0.999999	100
GOTERM_BP_FAT	GO:0051129~negative regulation of cellular component organization	6	0.204082	0.940765	BIF, BUB1, ALPHATUB84B, BUBR1, ALPHA-SPEC, BETA-SPEC, BUB3	1203	56	7937	0.706893	1	1	100
Annotation Cluster 80	Enrichment Score: 0.2588736946792036
Category	Term	Count	%	PValue	Genes	List Total	Pop Hits	Pop Total	Fold Enrichment	Bonferroni	Benjamini	FDR
GOTERM_BP_FAT	GO:0019400~alditol metabolic process	4	0.136054	0.52743	CG1271, CG31169, CG11619, CG2818	1203	18	7937	1.46615	1	0.999076	99.9998
GOTERM_BP_FAT	GO:0006071~glycerol metabolic process	4	0.136054	0.52743	CG1271, CG31169, CG11619, CG2818	1203	18	7937	1.46615	1	0.999076	99.9998
GOTERM_BP_FAT	GO:0019751~polyol metabolic process	5	0.170068	0.601241	CG1271, CG31169, CG11619, CG2818, 5PTASEI	1203	27	7937	1.22179	1	0.999698	100
Annotation Cluster 81	Enrichment Score: 0.2510091485342925
Category	Term	Count	%	PValue	Genes	List Total	Pop Hits	Pop Total	Fold Enrichment	Bonferroni	Benjamini	FDR
GOTERM_BP_FAT	GO:0016568~chromatin modification	20	0.680272	0.33246	CG4565, CG40351, BRE1, ARP8, ARP5, BALL, ADA2B, ART1, BUR, BRM, ART4, ASF1, CG11033, BORR, CAF1, BKA, CG2051, ASH1, ASH2, ACF1	1203	112	7937	1.17816	1	0.989164	99.9083
GOTERM_BP_FAT	GO:0006325~chromatin organization	26	0.884354	0.597397	CG4565, BRE1, CG40351, ADA2B, ART1, CG11033, ART4, CAF1-105, CAF1, BKA, CG2051, ACF1, ARP8, ARP5, BALL, CAF1-180, BEAF-32, BUR, CG3708, BRM, ASF1, BORR, ASH1, ASH2, CG34422, A16	1203	170	7937	1.00906	1	0.999682	100
GOTERM_BP_FAT	GO:0016569~covalent chromatin modification	9	0.306122	0.607312	ART4, BORR, BRE1, BALL, CAF1, ASH1, CG2051, ART1, BUR	1203	55	7937	1.07962	1	0.999718	100
GOTERM_BP_FAT	GO:0016570~histone modification	9	0.306122	0.607312	ART4, BORR, BRE1, BALL, CAF1, ASH1, CG2051, ART1, BUR	1203	55	7937	1.07962	1	0.999718	100
GOTERM_BP_FAT	GO:0051276~chromosome organization	40	1.36054	0.758801	CAM, CG4565, BRE1, CG40351, ASP, ADA2B, CAP-G, ART1, CG11033, ART4, CAP-D2, CAF1-105, CAP-D3, CDC45L, CAV, CAP-H2, CAF1, BARR, BKA, CG2051, ACF1, ARP8, BALL, CENP-C, ARP5, BAF, CAF1-180, BEAF-32, BUR, CG3708, ASF1, BRM, BTK29A, BORR, BJ1, ASH1, ASH2, CG4203, CG34422, A16	1203	282	7937	0.93584	1	0.999969	100
Annotation Cluster 82	Enrichment Score: 0.24417972644281413
Category	Term	Count	%	PValue	Genes	List Total	Pop Hits	Pop Total	Fold Enrichment	Bonferroni	Benjamini	FDR
GOTERM_MF_FAT	GO:0004467~long-chain-fatty-acid-CoA ligase activity	3	0.102041	0.468771	BGM, CG6178, CG18155	1510	8	7918	1.96639	1	0.995389	99.9958
GOTERM_MF_FAT	GO:0015645~fatty-acid ligase activity	3	0.102041	0.468771	BGM, CG6178, CG18155	1510	8	7918	1.96639	1	0.995389	99.9958
GOTERM_MF_FAT	GO:0016877~ligase activity, forming carbon-sulfur bonds	4	0.136054	0.84244	BGM, ATPCL, CG6178, CG18155	1510	23	7918	0.911949	1	0.999984	100
Annotation Cluster 83	Enrichment Score: 0.2383141894980987
Category	Term	Count	%	PValue	Genes	List Total	Pop Hits	Pop Total	Fold Enrichment	Bonferroni	Benjamini	FDR
GOTERM_MF_FAT	GO:0005385~zinc ion transmembrane transporter activity	3	0.102041	0.397235	CG5130, CG11163, CG6672	1510	7	7918	2.2473	1	0.991453	99.9684
GOTERM_MF_FAT	GO:0015082~di-, tri-valent inorganic cation transmembrane transporter activity	5	0.170068	0.663761	CG5130, CA-P60A, ATP7, CG11163, CG6672	1510	23	7918	1.13994	1	0.999535	100
GOTERM_MF_FAT	GO:0046915~transition metal ion transmembrane transporter activity	4	0.136054	0.731136	CG5130, ATP7, CG11163, CG6672	1510	19	7918	1.10394	1	0.999838	100
Annotation Cluster 84	Enrichment Score: 0.2380327928249936
Category	Term	Count	%	PValue	Genes	List Total	Pop Hits	Pop Total	Fold Enrichment	Bonferroni	Benjamini	FDR
GOTERM_BP_FAT	GO:0006508~proteolysis	123	4.18367	0.120778	CG17370, CG11110, CG10107, CG4725, CG4169, CG4165, CG4998, CG5390, CG14642, CG3731, CG10602, CG4914, CG2200, CG2658, CG5715, CG11261, CG5527, CG5188, CG11836, CG1299, CG3099, CG5798, CG5794, CG4096, CG4603, CG32473, CG3744, CG2493, CG2025, CG30187, CG33128, CG32147, CG11034, CALPC, CALPB, CG13630, CG3355, CG3356, CG32479, CG11459, CG4502, CG4406, CG40470, CG34350, CG13430, CG16979, CG5087, CG3236…	1203	731	7937	1.11014	1	0.861055	89.2218
GOTERM_MF_FAT	GO:0070011~peptidase activity, acting on L-amino acid peptides	102	3.46939	0.959839	CG17370, CG11110, CG10107, CG2145, CG4725, CG4169, CG4165, CG4998, ATG4, CG5390, CG14642, CG3731, CG10602, CG4914, CG2200, CG2658, CG5715, CG5527, CG5188, CG11836, CG1299, CG18659, CG5798, CG5794, CG4096, CG4603, CG3744, CG32473, CG2493, CG2025, CG30187, CG33128, CG32147, CG11034, CALPC, CALPB, CG13630, CG3355, CG11459, CG4406, CG40470, CG34350, CG13430, CG16979, CG32369, CG32808, CG1440, CG12717…	1510	612	7918	0.873951	1	1	100
GOTERM_MF_FAT	GO:0008233~peptidase activity	108	3.67347	0.963667	CG17370, CG11110, CG10107, CG2145, CG4725, CG4169, CG4165, CG4998, ATG4, CG5390, CG14642, CG3731, CG10602, CG4914, CG2200, CG2658, CG5715, CG5527, CG5188, CG11836, CG1299, CG18659, CG5798, CG5794, CG4096, CG4603, CG3744, CG32473, CG2493, CG2025, CG30187, CG33128, CG32147, CG11034, CALPC, CALPB, CG13630, CG3355, CG11459, CG4406, CG40470, CG34350, CG13430, CG16979, CG32369, CG13779, CG32808, CG1440…	1510	648	7918	0.873951	1	1	100
GOTERM_MF_FAT	GO:0004175~endopeptidase activity	63	2.14286	0.999437	CG17370, CG14231, CG6194, CG30414, CG4725, CG4169, CG6512, CG31918, CG17331, CG4420, CG4998, ATG4, CG5390, CG14642, CG11771, CG3731, CG4914, 26-29-P, CG2658, CG5715, CG3775, CG5355, CG31217, CG5527, CG11836, CG1299, CG5045, CG4096, CG6696, CG10882, CATHD, CG30187, CG2025, CG33128, CG5367, CG3499, CALPC, CALPB, CG3355, CG31728, CG6041, CG11459, CG4406, CG14528, CG34350, CG40160, CG13430, CG4933, C…	1510	457	7918	0.722874	1	1	100
Annotation Cluster 85	Enrichment Score: 0.23420989758158522
Category	Term	Count	%	PValue	Genes	List Total	Pop Hits	Pop Total	Fold Enrichment	Bonferroni	Benjamini	FDR
GOTERM_MF_FAT	GO:0051119~sugar transmembrane transporter activity	7	0.238095	0.411766	CG30035, CG14040, CG4797, CG10960, CG31100, CG34360, CG14621	1510	27	7918	1.35948	1	0.99227	99.9786
GOTERM_MF_FAT	GO:0005355~glucose transmembrane transporter activity	4	0.136054	0.612555	CG30035, CG4797, CG10960, CG14621	1510	16	7918	1.31093	1	0.999131	100
GOTERM_MF_FAT	GO:0015145~monosaccharide transmembrane transporter activity	5	0.170068	0.627143	CG30035, CG4797, CG10960, CG31100, CG14621	1510	22	7918	1.19175	1	0.999313	100
GOTERM_MF_FAT	GO:0015149~hexose transmembrane transporter activity	4	0.136054	0.731136	CG30035, CG4797, CG10960, CG14621	1510	19	7918	1.10394	1	0.999838	100
Annotation Cluster 86	Enrichment Score: 0.19758337109297552
Category	Term	Count	%	PValue	Genes	List Total	Pop Hits	Pop Total	Fold Enrichment	Bonferroni	Benjamini	FDR
GOTERM_MF_FAT	GO:0008559~xenobiotic-transporting ATPase activity	3	0.102041	0.595217	CG11897, CG3156, CG5789	1510	10	7918	1.57311	1	0.998958	99.9999
GOTERM_MF_FAT	GO:0042910~xenobiotic transporter activity	3	0.102041	0.595217	CG11897, CG3156, CG5789	1510	10	7918	1.57311	1	0.998958	99.9999
GOTERM_MF_FAT	GO:0015238~drug transporter activity	4	0.136054	0.655635	CG11897, CG11537, CG3156, CG5789	1510	17	7918	1.23381	1	0.999527	100
GOTERM_MF_FAT	GO:0015239~multidrug transporter activity	3	0.102041	0.697676	CG11897, CG3156, CG5789	1510	12	7918	1.31093	1	0.999712	100
Annotation Cluster 87	Enrichment Score: 0.19264027964554395
Category	Term	Count	%	PValue	Genes	List Total	Pop Hits	Pop Total	Fold Enrichment	Bonferroni	Benjamini	FDR
GOTERM_MF_FAT	GO:0015035~protein disulfide oxidoreductase activity	3	0.102041	0.595217	CG14407, CG12206, CG6523	1510	10	7918	1.57311	1	0.998958	99.9999
GOTERM_MF_FAT	GO:0015036~disulfide oxidoreductase activity	5	0.170068	0.627143	CG6673, CG14407, CG12206, CG6523, CG3719	1510	22	7918	1.19175	1	0.999313	100
GOTERM_MF_FAT	GO:0016667~oxidoreductase activity, acting on sulfur group of donors	7	0.238095	0.708007	CG6673, CG4670, CG14407, CG12206, CG6523, CG3719, CG17843	1510	36	7918	1.01961	1	0.999747	100
Annotation Cluster 88	Enrichment Score: 0.1923020807040576
Category	Term	Count	%	PValue	Genes	List Total	Pop Hits	Pop Total	Fold Enrichment	Bonferroni	Benjamini	FDR
GOTERM_BP_FAT	GO:0006839~mitochondrial transport	12	0.408163	0.169173	CG11110, CG18317, CG33331, ARALAR1, CG11779, CG31229, CG3156, CG34132, CG1628, CG14043, CG3476, CG1907	1203	53	7937	1.49381	1	0.924229	95.9541
GOTERM_BP_FAT	GO:0007005~mitochondrion organization	11	0.37415	0.684813	CG11110, CG33649, CG33331, CG4567, CG17510, CG11779, CG31229, CG5924, CG34132, CG11077, CDK4	1203	73	7937	0.99417	1	0.999904	100
GOTERM_BP_FAT	GO:0006626~protein targeting to mitochondrion	5	0.170068	0.735779	CG11110, CG33331, CG11779, CG31229, CG34132	1203	32	7937	1.03089	1	0.999957	100
GOTERM_BP_FAT	GO:0070585~protein localization in mitochondrion	5	0.170068	0.735779	CG11110, CG33331, CG11779, CG31229, CG34132	1203	32	7937	1.03089	1	0.999957	100
GOTERM_BP_FAT	GO:0006605~protein targeting	15	0.510204	0.787735	CG11110, CG33331, CG4289, CG31229, CG34132, BOCA, CDM, ARR, CG3639, CG32164, CG11779, CAR, CG5885, CG4663, CG10420	1203	109	7937	0.907937	1	0.999983	100
GOTERM_BP_FAT	GO:0017038~protein import	8	0.272109	0.921925	CG11110, CG33331, CDM, CG32164, CG11779, CG31229, CG34132, CG4663	1203	70	7937	0.75402	1	1	100
GOTERM_BP_FAT	GO:0033365~protein localization in organelle	8	0.272109	0.98949	CG11110, CG33331, CDM, CG32164, CG11779, CG31229, CG34132, CG10420	1203	91	7937	0.580015	1	1	100
Annotation Cluster 89	Enrichment Score: 0.1871460422033513
Category	Term	Count	%	PValue	Genes	List Total	Pop Hits	Pop Total	Fold Enrichment	Bonferroni	Benjamini	FDR
GOTERM_BP_FAT	GO:0009166~nucleotide catabolic process	3	0.102041	0.562306	CG3788, CG6330, CG11883	1203	12	7937	1.64942	1	0.999449	99.9999
GOTERM_BP_FAT	GO:0034656~nucleobase, nucleoside and nucleotide catabolic process	3	0.102041	0.649135	CG3788, CG6330, CG11883	1203	14	7937	1.41379	1	0.999838	100
GOTERM_BP_FAT	GO:0034655~nucleobase, nucleoside, nucleotide and nucleic acid catabolic process	3	0.102041	0.649135	CG3788, CG6330, CG11883	1203	14	7937	1.41379	1	0.999838	100
GOTERM_BP_FAT	GO:0044270~nitrogen compound catabolic process	3	0.102041	0.752962	CG3788, CG6330, CG11883	1203	17	7937	1.1643	1	0.999969	100
Annotation Cluster 90	Enrichment Score: 0.1865395504213365
Category	Term	Count	%	PValue	Genes	List Total	Pop Hits	Pop Total	Fold Enrichment	Bonferroni	Benjamini	FDR
GOTERM_BP_FAT	GO:0006334~nucleosome assembly	6	0.204082	0.453369	ASF1, CAF1-105, CAF1, CAF1-180, ACF1, CG3708	1203	29	7937	1.36504	1	0.997854	99.9971
GOTERM_BP_FAT	GO:0006323~DNA packaging	11	0.37415	0.531638	ASF1, CAP-D2, CAF1-105, CDC45L, BJ1, CAF1, BARR, CAF1-180, ACF1, CAP-G, CG3708	1203	65	7937	1.11653	1	0.999096	99.9998
GOTERM_BP_FAT	GO:0031497~chromatin assembly	6	0.204082	0.654407	ASF1, CAF1-105, CAF1, CAF1-180, ACF1, CG3708	1203	36	7937	1.09961	1	0.999836	100
GOTERM_BP_FAT	GO:0065004~protein-DNA complex assembly	7	0.238095	0.755065	ASF1, CDC6, CAF1-105, CAF1, CAF1-180, ACF1, CG3708	1203	48	7937	0.962161	1	0.999968	100
GOTERM_BP_FAT	GO:0006333~chromatin assembly or disassembly	8	0.272109	0.780634	ASF1, CAF1-105, CAF1, CAF1-180, ACF1, CG34422, A16, CG3708	1203	57	7937	0.925989	1	0.999982	100
GOTERM_BP_FAT	GO:0034728~nucleosome organization	6	0.204082	0.817363	ASF1, CAF1-105, CAF1, CAF1-180, ACF1, CG3708	1203	44	7937	0.899683	1	0.99999	100
Annotation Cluster 91	Enrichment Score: 0.1781835850016409
Category	Term	Count	%	PValue	Genes	List Total	Pop Hits	Pop Total	Fold Enrichment	Bonferroni	Benjamini	FDR
GOTERM_BP_FAT	GO:0000079~regulation of cyclin-dependent protein kinase activity	3	0.102041	0.226873	CDK7, CG6345, CG30291	1203	6	7937	3.29884	1	0.960872	98.8358
GOTERM_BP_FAT	GO:0045859~regulation of protein kinase activity	9	0.306122	0.516705	CDC42, ALPH, CG16708, BORA, ABI, CDK7, CG6345, CG30291, BSK	1203	51	7937	1.1643	1	0.998895	99.9997
GOTERM_BP_FAT	GO:0043549~regulation of kinase activity	9	0.306122	0.516705	CDC42, ALPH, CG16708, BORA, ABI, CDK7, CG6345, CG30291, BSK	1203	51	7937	1.1643	1	0.998895	99.9997
GOTERM_BP_FAT	GO:0051338~regulation of transferase activity	9	0.306122	0.516705	CDC42, ALPH, CG16708, BORA, ABI, CDK7, CG6345, CG30291, BSK	1203	51	7937	1.1643	1	0.998895	99.9997
GOTERM_BP_FAT	GO:0042325~regulation of phosphorylation	9	0.306122	0.788376	CDC42, ALPH, CG16708, BORA, ABI, CDK7, CG6345, CG30291, BSK	1203	65	7937	0.913524	1	0.999983	100
GOTERM_BP_FAT	GO:0045860~positive regulation of protein kinase activity	4	0.136054	0.79873	CDC42, CG16708, BORA, ABI	1203	27	7937	0.977433	1	0.999985	100
GOTERM_BP_FAT	GO:0051347~positive regulation of transferase activity	4	0.136054	0.79873	CDC42, CG16708, BORA, ABI	1203	27	7937	0.977433	1	0.999985	100
GOTERM_BP_FAT	GO:0033674~positive regulation of kinase activity	4	0.136054	0.79873	CDC42, CG16708, BORA, ABI	1203	27	7937	0.977433	1	0.999985	100
GOTERM_BP_FAT	GO:0043085~positive regulation of catalytic activity	8	0.272109	0.871192	CDC42, 5-HT7, CG16708, 14-3-3ZETA, BORA, ARK, APH-1, ABI	1203	64	7937	0.824709	1	0.999998	100
GOTERM_BP_FAT	GO:0051174~regulation of phosphorus metabolic process	9	0.306122	0.872462	CDC42, ALPH, CG16708, BORA, ABI, CDK7, CG6345, CG30291, BSK	1203	72	7937	0.824709	1	0.999998	100
GOTERM_BP_FAT	GO:0019220~regulation of phosphate metabolic process	9	0.306122	0.872462	CDC42, ALPH, CG16708, BORA, ABI, CDK7, CG6345, CG30291, BSK	1203	72	7937	0.824709	1	0.999998	100
GOTERM_BP_FAT	GO:0044093~positive regulation of molecular function	9	0.306122	0.872462	CDC42, 5-HT7, CG16708, 14-3-3ZETA, BORA, AOS1, ARK, APH-1, ABI	1203	72	7937	0.824709	1	0.999998	100
Annotation Cluster 92	Enrichment Score: 0.16737395928388935
Category	Term	Count	%	PValue	Genes	List Total	Pop Hits	Pop Total	Fold Enrichment	Bonferroni	Benjamini	FDR
GOTERM_MF_FAT	GO:0005088~Ras guanyl-nucleotide exchange factor activity	8	0.272109	0.47825	CG4853, CDEP, CG15611, CG33275, BJ1, CG10188, CG1657, C3G	1510	34	7918	1.23381	1	0.995866	99.9968
GOTERM_MF_FAT	GO:0005085~guanyl-nucleotide exchange factor activity	12	0.408163	0.609088	CG31158, CG4853, CDEP, CG11376, CG5522, CG15611, CG33275, BJ1, CG14782, CG10188, CG1657, C3G	1510	60	7918	1.04874	1	0.999116	100
GOTERM_BP_FAT	GO:0035023~regulation of Rho protein signal transduction	4	0.136054	0.818837	CDEP, CG15611, CG33275, CG10188	1203	28	7937	0.942525	1	0.99999	100
GOTERM_MF_FAT	GO:0005089~Rho guanyl-nucleotide exchange factor activity	4	0.136054	0.897371	CDEP, CG15611, CG33275, CG10188	1510	26	7918	0.806724	1	0.999998	100
Annotation Cluster 93	Enrichment Score: 0.16719958724510087
Category	Term	Count	%	PValue	Genes	List Total	Pop Hits	Pop Total	Fold Enrichment	Bonferroni	Benjamini	FDR
GOTERM_BP_FAT	GO:0051240~positive regulation of multicellular organismal process	6	0.204082	0.389569	AKT1, ALPH, ALPHA-SPEC, BABO, BETA-SPEC, BTSZ	1203	27	7937	1.46615	1	0.994744	99.9805
GOTERM_BP_FAT	GO:0040018~positive regulation of multicellular organism growth	3	0.102041	0.68714	AKT1, BABO, BTSZ	1203	15	7937	1.31953	1	0.999903	100
GOTERM_BP_FAT	GO:0045927~positive regulation of growth	4	0.136054	0.869163	AKT1, BABO, BUN, BTSZ	1203	31	7937	0.851313	1	0.999997	100
GOTERM_BP_FAT	GO:0040014~regulation of multicellular organism growth	3	0.102041	0.921448	AKT1, BABO, BTSZ	1203	26	7937	0.76127	1	1	100
Annotation Cluster 94	Enrichment Score: 0.16397243257152694
Category	Term	Count	%	PValue	Genes	List Total	Pop Hits	Pop Total	Fold Enrichment	Bonferroni	Benjamini	FDR
GOTERM_BP_FAT	GO:0046330~positive regulation of JNK cascade	3	0.102041	0.405556	ALIX, ALG-2, ARM	1203	9	7937	2.19922	1	0.99558	99.9877
GOTERM_BP_FAT	GO:0070304~positive regulation of stress-activated protein kinase signaling pathway	3	0.102041	0.405556	ALIX, ALG-2, ARM	1203	9	7937	2.19922	1	0.99558	99.9877
GOTERM_BP_FAT	GO:0043410~positive regulation of MAPKKK cascade	3	0.102041	0.405556	ALIX, ALG-2, ARM	1203	9	7937	2.19922	1	0.99558	99.9877
GOTERM_BP_FAT	GO:0010740~positive regulation of protein kinase cascade	3	0.102041	0.513435	ALIX, ALG-2, ARM	1203	11	7937	1.79937	1	0.998858	99.9996
GOTERM_BP_FAT	GO:0048584~positive regulation of response to stimulus	3	0.102041	0.752962	ALIX, ALG-2, ARM	1203	17	7937	1.1643	1	0.999969	100
GOTERM_BP_FAT	GO:0080135~regulation of cellular response to stress	5	0.170068	0.758103	ALIX, ALG-2, ARM, BSK, CG4078	1203	33	7937	0.999647	1	0.999969	100
GOTERM_BP_FAT	GO:0010647~positive regulation of cell communication	7	0.238095	0.83419	ALIX, AMX, ALPHA-SPEC, ALG-2, ARM, BETA-SPEC, C15	1203	53	7937	0.871391	1	0.999993	100
GOTERM_BP_FAT	GO:0046328~regulation of JNK cascade	4	0.136054	0.882961	ALIX, ALG-2, ARM, BSK	1203	32	7937	0.824709	1	0.999998	100
GOTERM_BP_FAT	GO:0070302~regulation of stress-activated protein kinase signaling pathway	4	0.136054	0.882961	ALIX, ALG-2, ARM, BSK	1203	32	7937	0.824709	1	0.999998	100
GOTERM_BP_FAT	GO:0043408~regulation of MAPKKK cascade	4	0.136054	0.906722	ALIX, ALG-2, ARM, BSK	1203	34	7937	0.776197	1	0.999999	100
GOTERM_BP_FAT	GO:0009967~positive regulation of signal transduction	5	0.170068	0.961462	ALIX, AMX, ALG-2, ARM, C15	1203	51	7937	0.646831	1	1	100
GOTERM_BP_FAT	GO:0010627~regulation of protein kinase cascade	4	0.136054	0.971938	ALIX, ALG-2, ARM, BSK	1203	44	7937	0.599788	1	1	100
Annotation Cluster 95	Enrichment Score: 0.16100681106997147
Category	Term	Count	%	PValue	Genes	List Total	Pop Hits	Pop Total	Fold Enrichment	Bonferroni	Benjamini	FDR
GOTERM_MF_FAT	GO:0017137~Rab GTPase binding	3	0.102041	0.321489	CG31935, CG1418, CG4030	1510	6	7918	2.62185	1	0.983128	99.7921
GOTERM_MF_FAT	GO:0051020~GTPase binding	5	0.170068	0.784891	CG32138, CG11376, CG31935, CG1418, CG4030	1510	27	7918	0.971057	1	0.99994	100
GOTERM_MF_FAT	GO:0019899~enzyme binding	11	0.37415	0.833434	BIF, CAPT, CG32138, CG11376, AGO1, CAF1, CG31935, CG11261, CG1418, CG4030, CG1815	1510	66	7918	0.873951	1	0.999981	100
GOTERM_MF_FAT	GO:0031267~small GTPase binding	4	0.136054	0.863096	CG32138, CG31935, CG1418, CG4030	1510	24	7918	0.873951	1	0.999992	100
GOTERM_MF_FAT	GO:0017016~Ras GTPase binding	4	0.136054	0.863096	CG32138, CG31935, CG1418, CG4030	1510	24	7918	0.873951	1	0.999992	100
Annotation Cluster 96	Enrichment Score: 0.15947474806729514
Category	Term	Count	%	PValue	Genes	List Total	Pop Hits	Pop Total	Fold Enrichment	Bonferroni	Benjamini	FDR
GOTERM_BP_FAT	GO:0007076~mitotic chromosome condensation	4	0.136054	0.445282	CAP-D2, BJ1, BARR, CAP-G	1203	16	7937	1.64942	1	0.99758	99.9963
GOTERM_BP_FAT	GO:0030261~chromosome condensation	5	0.170068	0.68655	CAP-D2, CDC45L, BJ1, BARR, CAP-G	1203	30	7937	1.09961	1	0.999905	100
GOTERM_BP_FAT	GO:0000070~mitotic sister chromatid segregation	7	0.238095	0.716594	CAP-D2, BJ1, BALL, CENP-C, BARR, CAP-G, CG4203	1203	46	7937	1.00399	1	0.999943	100
GOTERM_BP_FAT	GO:0000819~sister chromatid segregation	7	0.238095	0.736329	CAP-D2, BJ1, BALL, CENP-C, BARR, CAP-G, CG4203	1203	47	7937	0.982632	1	0.999956	100
GOTERM_BP_FAT	GO:0007059~chromosome segregation	11	0.37415	0.988494	CAP-D2, AXS, BIF, 14-3-3ZETA, BJ1, BALL, CENP-C, BARR, CAP-G, CG4203, CDC37	1203	117	7937	0.620294	1	1	100
Annotation Cluster 97	Enrichment Score: 0.15833797674584463
Category	Term	Count	%	PValue	Genes	List Total	Pop Hits	Pop Total	Fold Enrichment	Bonferroni	Benjamini	FDR
GOTERM_MF_FAT	GO:0015114~phosphate transmembrane transporter activity	7	0.238095	0.374535	CG3036, CG3649, CG4726, CG4330, CG14621, CG15438, CG15094	1510	26	7918	1.41177	1	0.988823	99.9431
GOTERM_MF_FAT	GO:0005436~sodium:phosphate symporter activity	5	0.170068	0.58807	CG3036, CG3649, CG4726, CG4330, CG15094	1510	21	7918	1.2485	1	0.998867	99.9999
GOTERM_MF_FAT	GO:0015103~inorganic anion transmembrane transporter activity	8	0.272109	0.605221	CG3036, CG3649, CG4726, CG4330, CG14621, CG15438, CG15094, CG1598	1510	38	7918	1.10394	1	0.999094	100
GOTERM_MF_FAT	GO:0005316~high affinity inorganic phosphate:sodium symporter activity	4	0.136054	0.695153	CG3649, CG4726, CG4330, CG15094	1510	18	7918	1.16527	1	0.99971	100
GOTERM_MF_FAT	GO:0015296~anion:cation symporter activity	7	0.238095	0.733764	CG3036, CG3649, CG4726, CG4330, CG12773, CG10413, CG15094	1510	37	7918	0.992053	1	0.99984	100
GOTERM_MF_FAT	GO:0015294~solute:cation symporter activity	14	0.47619	0.780659	CG10444, CG11655, CG4726, CG15279, CG12773, CG3036, CG14040, CG11778, CG3649, CG32669, CG34360, CG4330, CG15094, CG10413	1510	80	7918	0.917649	1	0.999943	100
GOTERM_MF_FAT	GO:0015293~symporter activity	14	0.47619	0.836384	CG10444, CG11655, CG4726, CG15279, CG12773, CG3036, CG14040, CG11778, CG3649, CG32669, CG34360, CG4330, CG15094, CG10413	1510	84	7918	0.873951	1	0.999982	100
GOTERM_MF_FAT	GO:0008509~anion transmembrane transporter activity	14	0.47619	0.914752	CG4726, CG1907, CG12773, CG15438, BEST1, CG3036, CG5284, CG3638, CG3649, CG4330, CG14621, CG1598, CG15094, CG10413	1510	92	7918	0.797956	1	0.999999	100
GOTERM_MF_FAT	GO:0015370~solute:sodium symporter activity	9	0.306122	0.925369	CG10444, CG11655, CG11778, CG3649, CG4726, CG32669, CG15279, CG4330, CG15094	1510	62	7918	0.761184	1	0.999999	100
Annotation Cluster 98	Enrichment Score: 0.1556053463498909
Category	Term	Count	%	PValue	Genes	List Total	Pop Hits	Pop Total	Fold Enrichment	Bonferroni	Benjamini	FDR
GOTERM_MF_FAT	GO:0004620~phospholipase activity	11	0.37415	0.433719	CG11619, CG10747, CG12034, CG6428, CG10133, CG2818, CG30503, CG6567, CG3376, CG30184, CG14507	1510	48	7918	1.20168	1	0.993779	99.9883
GOTERM_MF_FAT	GO:0008081~phosphoric diester hydrolase activity	5	0.170068	0.83093	CG11619, CG10747, CG12034, CG2818, CG3376	1510	29	7918	0.904088	1	0.999981	100
GOTERM_MF_FAT	GO:0016298~lipase activity	13	0.442177	0.947133	CG10747, CG12034, CG6428, CG6567, CG30184, CG17292, CG11619, CG11055, CG10133, CG2818, CG30503, CG3376, CG14507	1510	91	7918	0.749101	1	1	100
Annotation Cluster 99	Enrichment Score: 0.1524147387131377
Category	Term	Count	%	PValue	Genes	List Total	Pop Hits	Pop Total	Fold Enrichment	Bonferroni	Benjamini	FDR
GOTERM_BP_FAT	GO:0006402~mRNA catabolic process	5	0.170068	0.631176	CG3857, ARMI, CG11337, CG2091, CG6729	1203	28	7937	1.17816	1	0.999784	100
GOTERM_BP_FAT	GO:0006401~RNA catabolic process	5	0.170068	0.68655	CG3857, ARMI, CG11337, CG2091, CG6729	1203	30	7937	1.09961	1	0.999905	100
GOTERM_BP_FAT	GO:0000956~nuclear-transcribed mRNA catabolic process	4	0.136054	0.752913	CG3857, ARMI, CG2091, CG6729	1203	25	7937	1.05563	1	0.99997	100
GOTERM_BP_FAT	GO:0000184~nuclear-transcribed mRNA catabolic process, nonsense-mediated decay	3	0.102041	0.752962	CG3857, ARMI, CG6729	1203	17	7937	1.1643	1	0.999969	100
Annotation Cluster 100	Enrichment Score: 0.14969250986727156
Category	Term	Count	%	PValue	Genes	List Total	Pop Hits	Pop Total	Fold Enrichment	Bonferroni	Benjamini	FDR
GOTERM_BP_FAT	GO:0048096~chromatin-mediated maintenance of transcription	4	0.136054	0.183458	BRM, BKA, ASH1, ASH2	1203	10	7937	2.63907	1	0.937141	97.0031
GOTERM_BP_FAT	GO:0045815~positive regulation of gene expression, epigenetic	4	0.136054	0.225485	BRM, BKA, ASH1, ASH2	1203	11	7937	2.39915	1	0.960741	98.7991
GOTERM_MF_FAT	GO:0008134~transcription factor binding	17	0.578231	0.645367	BAP55, BGB, CG14907, CG14906, BON, ARM, CG5366, ALIEN, BRM, BAP170, CACT, CG11063, CG1847, BAP60, BRF, BIN1, ACHI, BL	1510	89	7918	1.00161	1	0.999473	100
GOTERM_MF_FAT	GO:0003713~transcription coactivator activity	6	0.204082	0.781349	BRM, BAP170, BAP55, BGB, BON, BAP60	1510	33	7918	0.953402	1	0.999937	100
GOTERM_BP_FAT	GO:0045941~positive regulation of transcription	16	0.544218	0.785153	CAMTA, BAP55, BGB, CG5641, ARM, BRM, AC, BAP170, ADF1, BOWL, BAP60, BKA, BRF, ASH1, ASH2, CBT	1203	116	7937	0.910024	1	0.999983	100
GOTERM_BP_FAT	GO:0010628~positive regulation of gene expression	16	0.544218	0.796059	CAMTA, BAP55, BGB, CG5641, ARM, BRM, AC, BAP170, ADF1, BOWL, BAP60, BKA, BRF, ASH1, ASH2, CBT	1203	117	7937	0.902246	1	0.999984	100
GOTERM_BP_FAT	GO:0051173~positive regulation of nitrogen compound metabolic process	16	0.544218	0.835736	CAMTA, BAP55, BGB, CG5641, ARM, BRM, AC, BAP170, ADF1, BOWL, BAP60, BKA, BRF, ASH1, ASH2, CBT	1203	121	7937	0.87242	1	0.999993	100
GOTERM_BP_FAT	GO:0045935~positive regulation of nucleobase, nucleoside, nucleotide and nucleic acid metabolic process	16	0.544218	0.835736	CAMTA, BAP55, BGB, CG5641, ARM, BRM, AC, BAP170, ADF1, BOWL, BAP60, BKA, BRF, ASH1, ASH2, CBT	1203	121	7937	0.87242	1	0.999993	100
GOTERM_MF_FAT	GO:0003712~transcription cofactor activity	10	0.340136	0.873168	ALIEN, BRM, BAP170, BAP55, CG14907, BGB, CG14906, BON, BAP60, BIN1, ACHI	1510	63	7918	0.832335	1	0.999995	100
GOTERM_BP_FAT	GO:0045893~positive regulation of transcription, DNA-dependent	11	0.37415	0.876666	BRM, BAP170, BAP55, BGB, BOWL, CG5641, BKA, BAP60, ASH1, ASH2, ARM	1203	88	7937	0.824709	1	0.999998	100
GOTERM_BP_FAT	GO:0010604~positive regulation of macromolecule metabolic process	18	0.612245	0.884012	CAMTA, BAP55, BGB, APC2, CG5641, ADA2B, ARM, BRM, AC, BAP170, ADF1, BOWL, BAP60, BKA, BRF, ASH1, ASH2, CBT	1203	142	7937	0.836325	1	0.999998	100
GOTERM_BP_FAT	GO:0051254~positive regulation of RNA metabolic process	11	0.37415	0.893001	BRM, BAP170, BAP55, BGB, BOWL, CG5641, BKA, BAP60, ASH1, ASH2, ARM	1203	90	7937	0.806382	1	0.999999	100
GOTERM_BP_FAT	GO:0010557~positive regulation of macromolecule biosynthetic process	16	0.544218	0.897267	CAMTA, BAP55, BGB, CG5641, ARM, BRM, AC, BAP170, ADF1, BOWL, BAP60, BKA, BRF, ASH1, ASH2, CBT	1203	129	7937	0.818316	1	0.999999	100
GOTERM_MF_FAT	GO:0016563~transcription activator activity	14	0.47619	0.921875	BAP55, BGB, BON, ARM, ATF-2, BRM, AC, BAP170, ASX, BOWL, BAP60, BKA, BRF, CBT	1510	93	7918	0.789375	1	0.999999	100
GOTERM_BP_FAT	GO:0009891~positive regulation of biosynthetic process	18	0.612245	0.940523	CAMTA, BAP55, BGB, CG5641, ARM, BRM, AC, BAP170, CACT, ADF1, BOWL, BG4, BAP60, BKA, BRF, ASH1, ASH2, CBT	1203	153	7937	0.776197	1	1	100
GOTERM_BP_FAT	GO:0031328~positive regulation of cellular biosynthetic process	18	0.612245	0.940523	CAMTA, BAP55, BGB, CG5641, ARM, BRM, AC, BAP170, CACT, ADF1, BOWL, BG4, BAP60, BKA, BRF, ASH1, ASH2, CBT	1203	153	7937	0.776197	1	1	100
Annotation Cluster 101	Enrichment Score: 0.14535597722581733
Category	Term	Count	%	PValue	Genes	List Total	Pop Hits	Pop Total	Fold Enrichment	Bonferroni	Benjamini	FDR
GOTERM_BP_FAT	GO:0018130~heterocycle biosynthetic process	15	0.510204	0.0686768	BW, 14-3-3ZETA, CG3156, CA, CG13090, APRT, CG11255, CG14721, ALAS, CG1749, CG2543, CG5037, CAR, CG1885, ADY43A	1203	61	7937	1.62238	1	0.717799	70.8096
GOTERM_BP_FAT	GO:0046148~pigment biosynthetic process	9	0.306122	0.628566	ALAS, BW, CAR, CG5037, CG3156, CA, ADE3, CG18143, APRT	1203	56	7937	1.06034	1	0.999793	100
GOTERM_BP_FAT	GO:0042440~pigment metabolic process	9	0.306122	0.802465	ALAS, BW, CAR, CG5037, CG3156, CA, ADE3, CG18143, APRT	1203	66	7937	0.899683	1	0.999986	100
GOTERM_BP_FAT	GO:0046158~ocellus pigment metabolic process	3	0.102041	0.829162	BW, CAR, CA	1203	20	7937	0.989651	1	0.999992	100
GOTERM_BP_FAT	GO:0046152~ommochrome metabolic process	3	0.102041	0.829162	BW, CAR, CA	1203	20	7937	0.989651	1	0.999992	100
GOTERM_BP_FAT	GO:0006727~ommochrome biosynthetic process	3	0.102041	0.829162	BW, CAR, CA	1203	20	7937	0.989651	1	0.999992	100
GOTERM_BP_FAT	GO:0033060~ocellus pigmentation	3	0.102041	0.829162	BW, CAR, CA	1203	20	7937	0.989651	1	0.999992	100
GOTERM_BP_FAT	GO:0008055~ocellus pigment biosynthetic process	3	0.102041	0.829162	BW, CAR, CA	1203	20	7937	0.989651	1	0.999992	100
GOTERM_BP_FAT	GO:0048066~pigmentation during development	7	0.238095	0.916865	BW, ABD-B, BI, CAR, CA, ATP7, CG18143	1203	61	7937	0.75711	1	0.999999	100
GOTERM_BP_FAT	GO:0006726~eye pigment biosynthetic process	4	0.136054	0.916884	BW, CAR, CA, CG18143	1203	35	7937	0.75402	1	0.999999	100
GOTERM_BP_FAT	GO:0042441~eye pigment metabolic process	4	0.136054	0.926027	BW, CAR, CA, CG18143	1203	36	7937	0.733075	1	1	100
GOTERM_BP_FAT	GO:0043473~pigmentation	7	0.238095	0.936988	BW, ABD-B, BI, CAR, CA, ATP7, CG18143	1203	64	7937	0.72162	1	1	100
GOTERM_BP_FAT	GO:0048069~eye pigmentation	4	0.136054	0.959351	BW, CAR, CA, CG18143	1203	41	7937	0.643675	1	1	100
GOTERM_BP_FAT	GO:0019748~secondary metabolic process	7	0.238095	0.97113	BW, CG30410, CG17333, CG4747, CAR, CA, CG15093	1203	72	7937	0.64144	1	1	100
Annotation Cluster 102	Enrichment Score: 0.14503483714279136
Category	Term	Count	%	PValue	Genes	List Total	Pop Hits	Pop Total	Fold Enrichment	Bonferroni	Benjamini	FDR
GOTERM_BP_FAT	GO:0006865~amino acid transport	7	0.238095	0.577895	CG13384, CG30394, CG5535, CG4743, CG1628, CG3476, CG12773	1203	40	7937	1.15459	1	0.999547	100
GOTERM_BP_FAT	GO:0015837~amine transport	7	0.238095	0.62782	CG13384, CG30394, CG5535, CG4743, CG1628, CG3476, CG12773	1203	42	7937	1.09961	1	0.999797	100
GOTERM_BP_FAT	GO:0015849~organic acid transport	8	0.272109	0.710964	CG13384, CG30394, CG5535, CG4743, CG1628, CG3476, CG1907, CG12773	1203	53	7937	0.995875	1	0.99994	100
GOTERM_BP_FAT	GO:0046942~carboxylic acid transport	8	0.272109	0.710964	CG13384, CG30394, CG5535, CG4743, CG1628, CG3476, CG1907, CG12773	1203	53	7937	0.995875	1	0.99994	100
GOTERM_MF_FAT	GO:0005275~amine transmembrane transporter activity	10	0.340136	0.801736	CG4630, CG13384, CG30394, CG5535, CG3790, CG4743, CG1628, CG15279, CG3476, CG12773	1510	58	7918	0.904088	1	0.99996	100
GOTERM_MF_FAT	GO:0015171~amino acid transmembrane transporter activity	7	0.238095	0.917023	CG13384, CG30394, CG5535, CG4743, CG1628, CG15279, CG12773	1510	48	7918	0.764708	1	0.999999	100
Annotation Cluster 103	Enrichment Score: 0.1368172373435836
Category	Term	Count	%	PValue	Genes	List Total	Pop Hits	Pop Total	Fold Enrichment	Bonferroni	Benjamini	FDR
GOTERM_BP_FAT	GO:0048806~genitalia development	4	0.136054	0.225485	BTK29A, ABD-B, BR, ABD-A	1203	11	7937	2.39915	1	0.960741	98.7991
GOTERM_BP_FAT	GO:0035215~genital disc development	3	0.102041	0.939914	BTK29A, ABD-B, ABD-A	1203	28	7937	0.706893	1	1	100
GOTERM_BP_FAT	GO:0045137~development of primary sexual characteristics	3	0.102041	0.980093	ABD-B, BR, ABD-A	1203	36	7937	0.549806	1	1	100
GOTERM_BP_FAT	GO:0007548~sex differentiation	4	0.136054	0.996508	BTK29A, ABD-B, BR, ABD-A	1203	60	7937	0.439845	1	1	100
GOTERM_MF_FAT	GO:0003704~specific RNA polymerase II transcription factor activity	5	0.170068	0.999909	AC, ABD-B, AB, BR, ABD-A	1510	77	7918	0.340501	1	1	100
Annotation Cluster 104	Enrichment Score: 0.1338743069146656
Category	Term	Count	%	PValue	Genes	List Total	Pop Hits	Pop Total	Fold Enrichment	Bonferroni	Benjamini	FDR
GOTERM_BP_FAT	GO:0007099~centriole replication	4	0.136054	0.52743	CAM, ANA1, ANA3, ANA2	1203	18	7937	1.46615	1	0.999076	99.9998
GOTERM_BP_FAT	GO:0051298~centrosome duplication	4	0.136054	0.636722	CAM, ANA1, ANA3, ANA2	1203	21	7937	1.2567	1	0.999797	100
GOTERM_BP_FAT	GO:0007098~centrosome cycle	5	0.170068	0.816314	CAM, ANA1, AUR, ANA3, ANA2	1203	36	7937	0.916343	1	0.99999	100
GOTERM_BP_FAT	GO:0031023~microtubule organizing center organization	6	0.204082	0.85983	CAM, ANA1, AUR, ANA3, ARMI, ANA2	1203	47	7937	0.842256	1	0.999996	100
GOTERM_BP_FAT	GO:0051297~centrosome organization	5	0.170068	0.90833	CAM, ANA1, AUR, ANA3, ANA2	1203	43	7937	0.767171	1	0.999999	100
Annotation Cluster 105	Enrichment Score: 0.12722363045634796
Category	Term	Count	%	PValue	Genes	List Total	Pop Hits	Pop Total	Fold Enrichment	Bonferroni	Benjamini	FDR
GOTERM_MF_FAT	GO:0005070~SH3/SH2 adaptor activity	3	0.102041	0.595217	CG5110, CG31012, CG31163	1510	10	7918	1.57311	1	0.998958	99.9999
GOTERM_MF_FAT	GO:0030674~protein binding, bridging	3	0.102041	0.697676	CG5110, CG31012, CG31163	1510	12	7918	1.31093	1	0.999712	100
GOTERM_MF_FAT	GO:0060090~molecular adaptor activity	3	0.102041	1	CG5110, CG31012, CG31163	1510	230	7918	0.0683962	1	1	100
Annotation Cluster 106	Enrichment Score: 0.12415715131300713
Category	Term	Count	%	PValue	Genes	List Total	Pop Hits	Pop Total	Fold Enrichment	Bonferroni	Benjamini	FDR
GOTERM_BP_FAT	GO:0008103~oocyte microtubule cytoskeleton polarization	6	0.204082	0.101728	BLUE, CAPT, 14-3-3ZETA, BTZ, BICD, 14-3-3EPSILON	1203	17	7937	2.32859	1	0.830263	84.3807
GOTERM_BP_FAT	GO:0016325~oocyte microtubule cytoskeleton organization	7	0.238095	0.269271	BLUE, CAPT, ARMI, 14-3-3ZETA, BTZ, BICD, 14-3-3EPSILON	1203	29	7937	1.59254	1	0.97599	99.5614
GOTERM_BP_FAT	GO:0030951~establishment or maintenance of microtubule cytoskeleton polarity	7	0.238095	0.269271	BLUE, CAPT, ARMI, 14-3-3ZETA, BTZ, BICD, 14-3-3EPSILON	1203	29	7937	1.59254	1	0.97599	99.5614
GOTERM_BP_FAT	GO:0030952~establishment or maintenance of cytoskeleton polarity	7	0.238095	0.269271	BLUE, CAPT, ARMI, 14-3-3ZETA, BTZ, BICD, 14-3-3EPSILON	1203	29	7937	1.59254	1	0.97599	99.5614
GOTERM_BP_FAT	GO:0030706~germarium-derived oocyte differentiation	6	0.204082	0.293555	14-3-3ZETA, APKC, ASP, ALPHA-SPEC, BICD, 14-3-3EPSILON	1203	24	7937	1.64942	1	0.982796	99.7556
GOTERM_BP_FAT	GO:0007293~germarium-derived egg chamber formation	12	0.408163	0.354247	BTK29A, BRN, ALPHA-CAT, APC2, CDC2, 14-3-3ZETA, APKC, ASP, ALPHA-SPEC, ARM, BICD, 14-3-3EPSILON	1203	63	7937	1.2567	1	0.991932	99.9484
GOTERM_BP_FAT	GO:0007294~germarium-derived oocyte fate determination	5	0.170068	0.468334	14-3-3ZETA, APKC, ALPHA-SPEC, BICD, 14-3-3EPSILON	1203	23	7937	1.43428	1	0.998174	99.9982
GOTERM_BP_FAT	GO:0030716~oocyte fate determination	5	0.170068	0.50329	14-3-3ZETA, APKC, ALPHA-SPEC, BICD, 14-3-3EPSILON	1203	24	7937	1.37452	1	0.998653	99.9994
GOTERM_BP_FAT	GO:0008105~asymmetric protein localization	5	0.170068	0.778937	AUR, ARMI, BORA, APKC, BTZ	1203	34	7937	0.970246	1	0.999982	100
GOTERM_BP_FAT	GO:0007365~periodic partitioning	5	0.170068	0.972597	BOWL, AGO1, AGO2, ARM, BOTV	1203	54	7937	0.610896	1	1	100
GOTERM_BP_FAT	GO:0001709~cell fate determination	13	0.442177	0.98193	AMX, AUR, BORA, 14-3-3ZETA, APKC, ALPHA-SPEC, BUN, ARM, ABD-A, AC, BRAT, BICD, 14-3-3EPSILON	1203	129	7937	0.664882	1	1	100
GOTERM_BP_FAT	GO:0045451~pole plasm oskar mRNA localization	3	0.102041	0.991533	BLUE, CAPU, BTZ	1203	42	7937	0.471262	1	1	100
GOTERM_BP_FAT	GO:0009994~oocyte differentiation	13	0.442177	0.991672	BLUE, CAPU, CAPT, BAI, 14-3-3ZETA, ASP, APKC, ALPHA-SPEC, ARMI, BTZ, ATX2, BICD, 14-3-3EPSILON	1203	138	7937	0.62152	1	1	100
GOTERM_BP_FAT	GO:0007308~oocyte construction	11	0.37415	0.99207	BLUE, CAPU, CAPT, BAI, ARMI, 14-3-3ZETA, APKC, BTZ, ALPHA-SPEC, BICD, 14-3-3EPSILON	1203	121	7937	0.599788	1	1	100
GOTERM_BP_FAT	GO:0007314~oocyte anterior/posterior axis specification	6	0.204082	0.99472	BLUE, CAPU, ARMI, APKC, BTZ, BICD	1203	78	7937	0.507513	1	1	100
GOTERM_BP_FAT	GO:0048599~oocyte development	11	0.37415	0.995083	BLUE, CAPU, CAPT, BAI, ARMI, 14-3-3ZETA, APKC, BTZ, ALPHA-SPEC, BICD, 14-3-3EPSILON	1203	126	7937	0.575987	1	1	100
GOTERM_BP_FAT	GO:0021700~developmental maturation	12	0.408163	0.995093	BLUE, CAPU, CAPT, BAI, ARMI, 14-3-3ZETA, APKC, BTZ, ALPHA-SPEC, ATP7, BICD, 14-3-3EPSILON	1203	135	7937	0.58646	1	1	100
GOTERM_BP_FAT	GO:0007315~pole plasm assembly	4	0.136054	0.995431	BLUE, CAPU, ARMI, BTZ	1203	58	7937	0.455012	1	1	100
GOTERM_BP_FAT	GO:0007309~oocyte axis specification	10	0.340136	0.9956	BLUE, CAPU, CAPT, BAI, ARMI, 14-3-3ZETA, APKC, BTZ, BICD, 14-3-3EPSILON	1203	118	7937	0.559125	1	1	100
GOTERM_BP_FAT	GO:0048469~cell maturation	11	0.37415	0.995954	BLUE, CAPU, CAPT, BAI, ARMI, 14-3-3ZETA, APKC, BTZ, ALPHA-SPEC, BICD, 14-3-3EPSILON	1203	128	7937	0.566987	1	1	100
GOTERM_BP_FAT	GO:0008358~maternal determination of anterior/posterior axis, embryo	6	0.204082	0.996299	BLUE, CAPU, ARMI, APKC, BTZ, BICD	1203	81	7937	0.488716	1	1	100
GOTERM_BP_FAT	GO:0019094~pole plasm mRNA localization	3	0.102041	0.996942	BLUE, CAPU, BTZ	1203	49	7937	0.403939	1	1	100
GOTERM_BP_FAT	GO:0007316~pole plasm RNA localization	3	0.102041	0.99736	BLUE, CAPU, BTZ	1203	50	7937	0.39586	1	1	100
GOTERM_BP_FAT	GO:0007028~cytoplasm organization	4	0.136054	0.99823	BLUE, CAPU, ARMI, BTZ	1203	65	7937	0.406011	1	1	100
GOTERM_BP_FAT	GO:0008298~intracellular mRNA localization	4	0.136054	0.998656	BLUE, CAPU, BTZ, BICD	1203	67	7937	0.393891	1	1	100
GOTERM_BP_FAT	GO:0009952~anterior/posterior pattern formation	11	0.37415	0.999955	BLUE, CAPU, ABD-B, BI, BOWL, ARMI, APKC, BTZ, ABD-A, CAD99C, BICD	1203	170	7937	0.426908	1	1	100
GOTERM_BP_FAT	GO:0009798~axis specification	14	0.47619	0.99996	BLUE, ABD-B, CAPU, CAPT, BAI, 14-3-3ZETA, APKC, CACTIN, CACT, BOWL, ARMI, BTZ, BICD, 14-3-3EPSILON	1203	201	7937	0.459539	1	1	100
GOTERM_BP_FAT	GO:0007351~tripartite regional subdivision	8	0.272109	0.999963	BLUE, CAPU, ABD-B, BOWL, ARMI, APKC, BTZ, BICD	1203	140	7937	0.37701	1	1	100
GOTERM_BP_FAT	GO:0008595~determination of anterior/posterior axis, embryo	8	0.272109	0.999963	BLUE, CAPU, ABD-B, BOWL, ARMI, APKC, BTZ, BICD	1203	140	7937	0.37701	1	1	100
GOTERM_BP_FAT	GO:0000578~embryonic axis specification	8	0.272109	0.99998	BLUE, CAPU, ABD-B, BOWL, ARMI, APKC, BTZ, BICD	1203	145	7937	0.36401	1	1	100
GOTERM_BP_FAT	GO:0009948~anterior/posterior axis specification	8	0.272109	0.999985	BLUE, CAPU, ABD-B, BOWL, ARMI, APKC, BTZ, BICD	1203	147	7937	0.359057	1	1	100
GOTERM_BP_FAT	GO:0007350~blastoderm segmentation	14	0.47619	0.999994	BLUE, ABD-B, CAPU, APKC, CDK4, ARM, ABD-A, BOWL, ARMI, AGO1, AGO2, BTZ, BOTV, BICD	1203	218	7937	0.423704	1	1	100
GOTERM_BP_FAT	GO:0009880~embryonic pattern specification	14	0.47619	0.999999	BLUE, ABD-B, CAPU, APKC, CDK4, ARM, ABD-A, BOWL, ARMI, AGO1, AGO2, BTZ, BOTV, BICD	1203	231	7937	0.399859	1	1	100
GOTERM_BP_FAT	GO:0035282~segmentation	16	0.544218	0.999999	BLUE, CAPU, ABD-B, APKC, BUN, CDK4, ARM, ABD-A, BOWL, ARMI, AGO1, AGO2, BTZ, BRAT, BOTV, BICD	1203	260	7937	0.406011	1	1	100
GOTERM_BP_FAT	GO:0003002~regionalization	33	1.12245	1	CAPU, ABD-B, CAPT, APC2, CACTIN, ABD-A, CAD99C, ANNIX, CACT, BI, BOWL, AGO1, AGO2, BRAT, 14-3-3EPSILON, BICD, BLUE, BTHD, BAI, CG14073, APKC, BUN, ARM, CDK4, CG1943, BRM, BRK, ARMI, CG11399, BTZ, ASH2, CBT, BOTV	1203	454	7937	0.479567	1	1	100
GOTERM_BP_FAT	GO:0007389~pattern specification process	34	1.15646	1	CAPU, ABD-B, CAPT, APC2, 14-3-3ZETA, CACTIN, ABD-A, CAD99C, ANNIX, CACT, BI, BOWL, AGO1, AGO2, BRAT, 14-3-3EPSILON, BICD, BLUE, BTHD, BAI, CG14073, APKC, BUN, ARM, CDK4, CG1943, BRM, BRK, ARMI, CG11399, BTZ, ASH2, CBT, BOTV	1203	480	7937	0.467335	1	1	100
Annotation Cluster 107	Enrichment Score: 0.12387079048232805
Category	Term	Count	%	PValue	Genes	List Total	Pop Hits	Pop Total	Fold Enrichment	Bonferroni	Benjamini	FDR
GOTERM_BP_FAT	GO:0007010~cytoskeleton organization	74	2.51701	0.385262	CAM, CG10754, ARP14D, AUR, 14-3-3ZETA, ALPHATUB84B, CAP-G, ARP87C, CAP-D2, ANK, CDC42, CCTGAMMA, CG13900, CG31352, CG14681, CG11985, BUBR1, CG12018, BICD, ARC-P20, ALIX, BAP55, CG13550, CG5525, ARP11, ARP8, CENP-C, BALL, ARP5, CG16941, ARM, C12.1, BTK29A, ALPHA-CAT, CG32138, ACT87E, CG33232, BTSZ, CAPU, BY, CAPT, CANB2, APC2, CG33251, CG10932, ASP, ARC-P34, ACT5C, BUB1, BARR, BUB3, ACTR13E, 14-3-…	1203	465	7937	1.04995	1	0.994482	99.978
GOTERM_BP_FAT	GO:0007067~mitosis	23	0.782313	0.546329	CDC2, AUR, BORA, ASP, CENP-C, BALL, CDC23, CDK7, CDC16, CAP-G, CDC27, CDC37, CAP-D2, AWD, BORR, CG14681, BJ1, CANA, CDC2C, BARR, CG11419, CG10336, CG4203	1203	146	7937	1.03936	1	0.999305	99.9999
GOTERM_BP_FAT	GO:0048285~organelle fission	24	0.816327	0.550752	CDC2, AUR, BORA, ASP, CENP-C, BALL, CDC23, CDK7, CDC16, CAP-G, CDC27, CDC37, CAP-D2, AWD, CG13827, BORR, CG14681, BJ1, CANA, CDC2C, BARR, CG11419, CG10336, CG4203	1203	153	7937	1.03493	1	0.999323	99.9999
GOTERM_BP_FAT	GO:0000087~M phase of mitotic cell cycle	23	0.782313	0.573895	CDC2, AUR, BORA, ASP, CENP-C, BALL, CDC23, CDK7, CDC16, CAP-G, CDC27, CDC37, CAP-D2, AWD, BORR, CG14681, BJ1, CANA, CDC2C, BARR, CG11419, CG10336, CG4203	1203	148	7937	1.02531	1	0.999523	100
GOTERM_BP_FAT	GO:0000280~nuclear division	23	0.782313	0.573895	CDC2, AUR, BORA, ASP, CENP-C, BALL, CDC23, CDK7, CDC16, CAP-G, CDC27, CDC37, CAP-D2, AWD, BORR, CG14681, BJ1, CANA, CDC2C, BARR, CG11419, CG10336, CG4203	1203	148	7937	1.02531	1	0.999523	100
GOTERM_BP_FAT	GO:0051301~cell division	29	0.986395	0.754474	APC2, BORA, ASP, BGCN, CAP-G, CDC37, ALPHATUB84D, ACT5C, ALPHA-ADAPTIN, BOL, CG14681, CAF1, BRAT, CG11419, CG10068, BAP55, CDC2, APKC, BALL, ARM, CDK5, BORR, CG5602, BJ1, CDC2C, ACT42A, ARF51F, CG10336, CG4203	1203	205	7937	0.933329	1	0.999968	100
GOTERM_BP_FAT	GO:0007052~mitotic spindle organization	27	0.918367	0.781765	CG10754, CAM, CG10932, ALPHATUB84B, ASP, CAP-G, CAP-D2, CG13900, CCTGAMMA, CG11985, BUB1, BUBR1, BARR, CG12018, BUB3, CG13550, CG11006, CG5525, CENP-C, BALL, CAL1, CG16941, C12.1, BORR, CCT5, ANA1, ANA3, ANA2	1203	194	7937	0.918233	1	0.999981	100
GOTERM_BP_FAT	GO:0000278~mitotic cell cycle	49	1.66667	0.84475	CAM, CG10754, AUR, 14-3-3ZETA, BORA, ALPHATUB84B, CDC16, CAP-G, CAP-D2, CCTGAMMA, CG13900, CG14681, CG11985, BUBR1, CG12018, CG13550, CG5525, CDC2, CDK8, CENP-C, BALL, CDK7, CG16941, C12.1, CANA, CG3530, CG4203, ALPH, APC2, CG10932, ASP, CDC37, AWD, BUB1, BARR, CG11419, BUB3, CG11006, CDC23, CAL1, CDC27, BORR, CCT5, ASX, ANA1, ANA3, ANA2, BJ1, CDC2C, CG10336	1203	358	7937	0.903033	1	0.999994	100
GOTERM_BP_FAT	GO:0000226~microtubule cytoskeleton organization	40	1.36054	0.863508	CAPT, CG10754, CAM, APC2, AUR, 14-3-3ZETA, ASP, CG10932, ALPHATUB84B, CAP-G, CAP-D2, CG13900, CCTGAMMA, CG14681, CG11985, BUB1, BUBR1, BARR, CG12018, BUB3, 14-3-3EPSILON, BICD, BLUE, AXS, CG13550, CG11006, CG5525, BALL, CENP-C, CAL1, CG3085, CG16941, ATL, C12.1, BORR, CCT5, ANA1, ARMI, ANA3, ANA2, BTZ	1203	298	7937	0.885594	1	0.999997	100
GOTERM_BP_FAT	GO:0007051~spindle organization	29	0.986395	0.894975	CG10754, CAM, ASP, CG10932, ALPHATUB84B, CAP-G, CAP-D2, CG13900, CCTGAMMA, CG14681, CG11985, BUB1, BUBR1, BARR, CG12018, BUB3, AXS, CG13550, CG11006, CG5525, CENP-C, BALL, CAL1, CG16941, C12.1, BORR, CCT5, ANA1, ANA3, ANA2	1203	225	7937	0.850367	1	0.999999	100
GOTERM_BP_FAT	GO:0007017~microtubule-based process	52	1.76871	0.943534	CAM, CG10754, AUR, 14-3-3ZETA, ALPHATUB84B, CAP-G, ALPHATUB84D, CAP-D2, BETATUB85D, CCTGAMMA, CG13900, CG14681, CG11985, BUBR1, CG12018, CG32392, BICD, CG13550, CG5525, CENP-C, BALL, CG16941, C12.1, CANA, BETATUB56D, CG12042, CAPT, APC2, CG15684, CG10932, ASP, BETATUB97EF, AWD, CG17293, BUB1, AGO2, BARR, BUB3, 14-3-3EPSILON, BLUE, AXS, CG11006, CG3085, CAL1, ATL, BORR, CCT5, ANA1, BTV, ANA3, ARMI…	1203	406	7937	0.845022	1	1	100
GOTERM_BP_FAT	GO:0000279~M phase	48	1.63265	0.999829	CG10754, CAM, AUR, BORA, ALPHATUB84B, CDC16, CAP-G, BGCN, CAP-D2, CG13900, CCTGAMMA, BOL, CG14681, CG11985, BUBR1, CG12018, CG13550, CG5525, CDC2, CENP-C, BALL, CDK7, CG16941, C12.1, CANA, CG4203, BIF, CG10932, ASP, CDC37, AWD, BUB1, BARR, CG11419, BUB3, AXS, CG11006, C(3)G, CDC23, CAL1, CDC27, BORR, CCT5, ANA1, ANA3, ANA2, BJ1, CDC2C, CG10336	1203	478	7937	0.662528	1	1	100
GOTERM_BP_FAT	GO:0022403~cell cycle phase	49	1.66667	0.999915	CAM, CG10754, AUR, BORA, ALPHATUB84B, CDC16, CAP-G, BGCN, CAP-D2, CCTGAMMA, CG13900, BOL, CG14681, CG11985, BUBR1, CG12018, CG13550, CG5525, CDC2, CDK8, CENP-C, BALL, CDK7, CG16941, C12.1, CANA, CG4203, BIF, CG10932, ASP, CDC37, AWD, BUB1, BARR, CG11419, BUB3, AXS, CG11006, CDC23, C(3)G, CAL1, CDC27, BORR, CCT5, ANA1, ANA3, ANA2, BJ1, CDC2C, CG10336	1203	496	7937	0.651786	1	1	100
GOTERM_BP_FAT	GO:0007049~cell cycle	64	2.17687	0.999918	CG10754, CAM, AUR, 14-3-3ZETA, BORA, ALPHATUB84B, CDC16, BGCN, CAP-G, CAP-D2, CG13900, CCTGAMMA, BOL, CG12343, CG14681, CG11985, BUBR1, CG12018, CG13550, CG5525, CDC2, CDK8, CENP-C, BALL, CDK9, CDK7, CG16941, CDK4, CDK5, C12.1, BTK29A, CANA, ARF51F, CG3530, CG4203, BIF, ALPH, APC2, CG10932, ASP, CDC37, AWD, AGO, CG3973, BUB1, BARR, CG11419, BUB3, AXS, CG11006, C(3)G, CDC23, CAL1, CDC27, BORR, CCT…	1203	616	7937	0.685472	1	1	100
GOTERM_BP_FAT	GO:0022402~cell cycle process	55	1.87075	0.99993	CAM, CG10754, AUR, BORA, ALPHATUB84B, CDC16, BGCN, CAP-G, CAP-D2, CCTGAMMA, CG13900, BOL, CG14681, CG11985, BUBR1, CG12018, CG13550, CG5525, CDC2, CDK8, CENP-C, BALL, CDK7, CG16941, C12.1, BTK29A, CANA, ARF51F, CG4203, BIF, APC2, CG10932, ASP, CDC37, AWD, AGO, CG3973, BUB1, BARR, CG11419, BUB3, AXS, CG11006, CDC23, C(3)G, CAL1, CDC27, BORR, CCT5, ANA1, ANA3, BJ1, ANA2, CDC2C, CG10336, ARP66B	1203	547	7937	0.663386	1	1	100
Annotation Cluster 108	Enrichment Score: 0.12182576398561383
Category	Term	Count	%	PValue	Genes	List Total	Pop Hits	Pop Total	Fold Enrichment	Bonferroni	Benjamini	FDR
GOTERM_BP_FAT	GO:0010608~posttranscriptional regulation of gene expression	20	0.680272	0.546862	ADAM, CG17737, CG5060, 14-3-3ZETA, CBP80, CG17265, ALIEN, BAP170, CG33649, BOL, ARMI, CG13163, AGO1, AGO2, AGO3, CBP20, BRAT, CG10306, BEL, BRU-2	1203	126	7937	1.04725	1	0.99929	99.9999
GOTERM_BP_FAT	GO:0006417~regulation of translation	9	0.306122	0.872462	CG33649, BOL, ADAM, CG17737, ARMI, CG13163, BRAT, CG10306, BRU-2	1203	72	7937	0.824709	1	0.999998	100
GOTERM_BP_FAT	GO:0032268~regulation of cellular protein metabolic process	16	0.544218	0.903439	APC2, ADAM, CG17737, ADA2B, ATG8A, BSK, ATAC1, CG33649, BOL, ARMI, CG13163, CG12084, CAR, BRAT, CG10306, BRU-2	1203	130	7937	0.812021	1	0.999999	100
Annotation Cluster 109	Enrichment Score: 0.10702680519759965
Category	Term	Count	%	PValue	Genes	List Total	Pop Hits	Pop Total	Fold Enrichment	Bonferroni	Benjamini	FDR
GOTERM_BP_FAT	GO:0070647~protein modification by small protein conjugation or removal	10	0.340136	0.703862	CG11070, BRE1, AOS1, CG5604, CG12082, CG2218, CG14619, CG13343, BEN, BUR	1203	67	7937	0.984727	1	0.99993	100
GOTERM_BP_FAT	GO:0032446~protein modification by small protein conjugation	7	0.238095	0.755065	CG11070, BRE1, AOS1, CG5604, CG2218, CG13343, BEN	1203	48	7937	0.962161	1	0.999968	100
GOTERM_BP_FAT	GO:0016567~protein ubiquitination	5	0.170068	0.898354	CG11070, BRE1, CG5604, CG2218, BEN	1203	42	7937	0.785437	1	0.999999	100
Annotation Cluster 110	Enrichment Score: 0.1021308598643134
Category	Term	Count	%	PValue	Genes	List Total	Pop Hits	Pop Total	Fold Enrichment	Bonferroni	Benjamini	FDR
GOTERM_BP_FAT	GO:0009124~nucleoside monophosphate biosynthetic process	9	0.306122	0.492925	CG32626, CG3216, CG14434, AC13E, CG4966, ADE3, ADE2, ADA, BUR	1203	50	7937	1.18758	1	0.9985	99.9992
GOTERM_BP_FAT	GO:0009123~nucleoside monophosphate metabolic process	9	0.306122	0.585452	CG32626, CG3216, CG14434, AC13E, CG4966, ADE3, ADE2, ADA, BUR	1203	54	7937	1.09961	1	0.999602	100
GOTERM_BP_FAT	GO:0009190~cyclic nucleotide biosynthetic process	3	0.102041	0.931265	CG3216, CG14434, AC13E	1203	27	7937	0.733075	1	1	100
GOTERM_MF_FAT	GO:0009975~cyclase activity	4	0.136054	0.958769	CG4061, CG3216, CG14434, AC13E	1510	32	7918	0.655464	1	1	100
GOTERM_BP_FAT	GO:0009187~cyclic nucleotide metabolic process	3	0.102041	0.960071	CG3216, CG14434, AC13E	1203	31	7937	0.638484	1	1	100
GOTERM_MF_FAT	GO:0016849~phosphorus-oxygen lyase activity	3	0.102041	0.985944	CG3216, CG14434, AC13E	1510	30	7918	0.524371	1	1	100
Annotation Cluster 111	Enrichment Score: 0.10208590972985632
Category	Term	Count	%	PValue	Genes	List Total	Pop Hits	Pop Total	Fold Enrichment	Bonferroni	Benjamini	FDR
GOTERM_BP_FAT	GO:0050808~synapse organization	7	0.238095	0.62782	ADF1, CAMKII, APKC, AGO1, ABI, ATL, BETA4GALNACTA	1203	42	7937	1.09961	1	0.999797	100
GOTERM_BP_FAT	GO:0007416~synaptogenesis	4	0.136054	0.668965	ADF1, APKC, AGO1, ATL	1203	22	7937	1.19958	1	0.999876	100
GOTERM_BP_FAT	GO:0048741~skeletal muscle fiber development	4	0.136054	0.69906	CAMKII, ABI, ATL, BETA4GALNACTA	1203	23	7937	1.14742	1	0.999924	100
GOTERM_BP_FAT	GO:0007528~neuromuscular junction development	4	0.136054	0.69906	CAMKII, ABI, ATL, BETA4GALNACTA	1203	23	7937	1.14742	1	0.999924	100
GOTERM_BP_FAT	GO:0048747~muscle fiber development	5	0.170068	0.711934	BR, CAMKII, ABI, ATL, BETA4GALNACTA	1203	31	7937	1.06414	1	0.99994	100
GOTERM_BP_FAT	GO:0014706~striated muscle tissue development	6	0.204082	0.745395	CAMKII, BLOW, ABI, ATL, ABD-A, BETA4GALNACTA	1203	40	7937	0.989651	1	0.999965	100
GOTERM_BP_FAT	GO:0060537~muscle tissue development	6	0.204082	0.765133	CAMKII, BLOW, ABI, ATL, ABD-A, BETA4GALNACTA	1203	41	7937	0.965513	1	0.999972	100
GOTERM_BP_FAT	GO:0007519~skeletal muscle tissue development	5	0.170068	0.798324	CAMKII, BLOW, ABI, ATL, BETA4GALNACTA	1203	35	7937	0.942525	1	0.999985	100
GOTERM_BP_FAT	GO:0055002~striated muscle cell development	6	0.204082	0.832551	CANB2, BR, CAMKII, ABI, ATL, BETA4GALNACTA	1203	45	7937	0.87969	1	0.999993	100
GOTERM_BP_FAT	GO:0055001~muscle cell development	6	0.204082	0.832551	CANB2, BR, CAMKII, ABI, ATL, BETA4GALNACTA	1203	45	7937	0.87969	1	0.999993	100
GOTERM_BP_FAT	GO:0051146~striated muscle cell differentiation	8	0.272109	0.881187	CANB2, BR, CAMKII, BLOW, ABI, ARF51F, ATL, BETA4GALNACTA	1203	65	7937	0.812021	1	0.999998	100
GOTERM_BP_FAT	GO:0060538~skeletal muscle organ development	7	0.238095	0.881486	AB, CAMKII, BLOW, ABI, ATL, BETA4GALNACTA, BETATUB56D	1203	57	7937	0.81024	1	0.999998	100
GOTERM_BP_FAT	GO:0043062~extracellular structure organization	8	0.272109	0.914911	BTK29A, ADF1, CAMKII, APKC, AGO1, ABI, ATL, BETA4GALNACTA	1203	69	7937	0.764948	1	0.999999	100
GOTERM_BP_FAT	GO:0042692~muscle cell differentiation	8	0.272109	0.945188	CANB2, BR, CAMKII, BLOW, ABI, ARF51F, ATL, BETA4GALNACTA	1203	74	7937	0.713262	1	1	100
GOTERM_BP_FAT	GO:0007517~muscle organ development	16	0.544218	0.94995	BAP55, BLOW, CG5343, ABD-A, ATL, BIGMAX, BRM, ASF1, AB, CAMKII, CAF1, BAP60, ABI, ACF1, BETA4GALNACTA, BETATUB56D	1203	140	7937	0.75402	1	1	100
Annotation Cluster 112	Enrichment Score: 0.09835867706809365
Category	Term	Count	%	PValue	Genes	List Total	Pop Hits	Pop Total	Fold Enrichment	Bonferroni	Benjamini	FDR
GOTERM_MF_FAT	GO:0004527~exonuclease activity	7	0.238095	0.708007	CG6171, CG42257, CG10214, CG12877, CG6744, CG11337, CG16940	1510	36	7918	1.01961	1	0.999747	100
GOTERM_MF_FAT	GO:0008408~3'-5' exonuclease activity	5	0.170068	0.729371	CG6171, CG10214, CG6744, CG11337, CG16940	1510	25	7918	1.04874	1	0.99984	100
GOTERM_MF_FAT	GO:0004532~exoribonuclease activity	3	0.102041	0.810211	CG10214, CG11337, CG16940	1510	15	7918	1.04874	1	0.999963	100
GOTERM_MF_FAT	GO:0016896~exoribonuclease activity, producing 5'-phosphomonoesters	3	0.102041	0.810211	CG10214, CG11337, CG16940	1510	15	7918	1.04874	1	0.999963	100
GOTERM_MF_FAT	GO:0016796~exonuclease activity, active with either ribo- or deoxyribonucleic acids and producing 5'-phosphomonoesters	3	0.102041	0.950657	CG10214, CG11337, CG16940	1510	23	7918	0.683962	1	1	100
Annotation Cluster 113	Enrichment Score: 0.09397408933400557
Category	Term	Count	%	PValue	Genes	List Total	Pop Hits	Pop Total	Fold Enrichment	Bonferroni	Benjamini	FDR
GOTERM_BP_FAT	GO:0006974~response to DNA damage stimulus	17	0.578231	0.684098	CG18271, CG5524, ARK, CG4049, CG11403, CG4853, CG11329, CG2183, CG42382, CG5602, AGT, CAF1, CG5316, CG10336, CG10898, 14-3-3EPSILON, CG4078	1203	115	7937	0.975308	1	0.999906	100
GOTERM_BP_FAT	GO:0006281~DNA repair	14	0.47619	0.790744	CG18271, CG5524, CG4049, CG11403, CG4853, CG11329, CG42382, CG2183, CG5602, AGT, CAF1, CG5316, CG10898, CG4078	1203	102	7937	0.905563	1	0.999983	100
GOTERM_BP_FAT	GO:0033554~cellular response to stress	24	0.816327	0.810132	CG18271, ATG12, CG5524, ARK, ATF-2, BSK, BTK29A, CG4049, CG11403, CDC42, CG4853, CG11329, CG2183, CG42382, CG5602, AGT, CAF1, CG5316, CAT, CG10336, CBT, CG4078, 14-3-3EPSILON, CG10898	1203	176	7937	0.899683	1	0.999988	100
GOTERM_BP_FAT	GO:0006259~DNA metabolic process	26	0.884354	0.96027	CG4049, AGO, CG4853, CDC45L, CAV, AGT, CAF1, CG5924, CG5316, CG12018, CG18271, CDC6, CG15220, CG5524, C(3)G, CG11403, BTK29A, CG33649, CG11329, CG2183, CG42382, CG5602, CG10336, CG14478, CG4078, CG10898	1203	221	7937	0.776197	1	1	100
Annotation Cluster 114	Enrichment Score: 0.08703483580653477
Category	Term	Count	%	PValue	Genes	List Total	Pop Hits	Pop Total	Fold Enrichment	Bonferroni	Benjamini	FDR
GOTERM_BP_FAT	GO:0070201~regulation of establishment of protein localization	5	0.170068	0.758103	AKT1, CAM, CACT, CANB2, CG1657	1203	33	7937	0.999647	1	0.999969	100
GOTERM_BP_FAT	GO:0051223~regulation of protein transport	5	0.170068	0.758103	AKT1, CAM, CACT, CANB2, CG1657	1203	33	7937	0.999647	1	0.999969	100
GOTERM_BP_FAT	GO:0046822~regulation of nucleocytoplasmic transport	5	0.170068	0.758103	AKT1, CAM, CACT, CANB2, BJ1	1203	33	7937	0.999647	1	0.999969	100
GOTERM_BP_FAT	GO:0032386~regulation of intracellular transport	5	0.170068	0.778937	AKT1, CAM, CACT, CANB2, BJ1	1203	34	7937	0.970246	1	0.999982	100
GOTERM_BP_FAT	GO:0032880~regulation of protein localization	5	0.170068	0.848334	AKT1, CAM, CACT, CANB2, CG1657	1203	38	7937	0.868115	1	0.999995	100
GOTERM_BP_FAT	GO:0042990~regulation of transcription factor import into nucleus	3	0.102041	0.849419	CAM, CACT, CANB2	1203	21	7937	0.942525	1	0.999995	100
GOTERM_BP_FAT	GO:0042306~regulation of protein import into nucleus	4	0.136054	0.853947	AKT1, CAM, CACT, CANB2	1203	30	7937	0.87969	1	0.999996	100
GOTERM_BP_FAT	GO:0033157~regulation of intracellular protein transport	4	0.136054	0.869163	AKT1, CAM, CACT, CANB2	1203	31	7937	0.851313	1	0.999997	100
GOTERM_BP_FAT	GO:0060341~regulation of cellular localization	8	0.272109	0.907359	BLUE, AKT1, BIC, CAM, CACT, CANB2, ARMI, BJ1	1203	68	7937	0.776197	1	0.999999	100
Annotation Cluster 115	Enrichment Score: 0.08036335924678904
Category	Term	Count	%	PValue	Genes	List Total	Pop Hits	Pop Total	Fold Enrichment	Bonferroni	Benjamini	FDR
GOTERM_MF_FAT	GO:0004869~cysteine-type endopeptidase inhibitor activity	3	0.102041	0.397235	CG31313, CG4091, CG12163	1510	7	7918	2.2473	1	0.991453	99.9684
GOTERM_MF_FAT	GO:0004857~enzyme inhibitor activity	11	0.37415	0.998449	CG34423, CG12807, CG31313, CG4091, CG13551, 14-3-3ZETA, CG12163, CG5639, CG31778, CG17168, 14-3-3EPSILON	1510	108	7918	0.534081	1	1	100
GOTERM_MF_FAT	GO:0004866~endopeptidase inhibitor activity	6	0.204082	0.999738	CG12807, CG31313, CG4091, CG12163, CG5639, CG31778	1510	80	7918	0.393278	1	1	100
GOTERM_MF_FAT	GO:0030414~peptidase inhibitor activity	6	0.204082	0.999841	CG12807, CG31313, CG4091, CG12163, CG5639, CG31778	1510	83	7918	0.379063	1	1	100
GOTERM_MF_FAT	GO:0004867~serine-type endopeptidase inhibitor activity	3	0.102041	0.999983	CG12807, CG5639, CG31778	1510	65	7918	0.242017	1	1	100
Annotation Cluster 116	Enrichment Score: 0.07893066151894983
Category	Term	Count	%	PValue	Genes	List Total	Pop Hits	Pop Total	Fold Enrichment	Bonferroni	Benjamini	FDR
GOTERM_BP_FAT	GO:0048136~male germ-line cyst formation	3	0.102041	0.287435	BOL, CDC2, BGCN	1203	7	7937	2.82757	1	0.981385	99.7163
GOTERM_BP_FAT	GO:0007127~meiosis I	4	0.136054	0.97524	BOL, CDC2, BALL, C(3)G	1203	45	7937	0.58646	1	1	100
GOTERM_BP_FAT	GO:0007143~female meiosis	3	0.102041	0.99962	AXS, BIF, BALL	1203	63	7937	0.314175	1	1	100
GOTERM_BP_FAT	GO:0007140~male meiosis	3	0.102041	1	BOL, CDC2, BGCN	1203	106	7937	0.186727	1	1	100
GOTERM_BP_FAT	GO:0051321~meiotic cell cycle	9	0.306122	1	AXS, BIF, BOL, CDC2, BALL, ASP, C(3)G, BGCN, CDC37	1203	211	7937	0.281417	1	1	100
GOTERM_BP_FAT	GO:0007126~meiosis	8	0.272109	1	AXS, BIF, BOL, CDC2, BALL, C(3)G, BGCN, CDC37	1203	200	7937	0.263907	1	1	100
GOTERM_BP_FAT	GO:0051327~M phase of meiotic cell cycle	8	0.272109	1	AXS, BIF, BOL, CDC2, BALL, C(3)G, BGCN, CDC37	1203	200	7937	0.263907	1	1	100
Annotation Cluster 117	Enrichment Score: 0.07021217389736444
Category	Term	Count	%	PValue	Genes	List Total	Pop Hits	Pop Total	Fold Enrichment	Bonferroni	Benjamini	FDR
GOTERM_BP_FAT	GO:0051653~spindle localization	3	0.102041	0.68714	APC2, AUR, ASP	1203	15	7937	1.31953	1	0.999903	100
GOTERM_BP_FAT	GO:0051293~establishment of spindle localization	3	0.102041	0.68714	APC2, AUR, ASP	1203	15	7937	1.31953	1	0.999903	100
GOTERM_BP_FAT	GO:0051647~nucleus localization	4	0.136054	0.853947	BSG, APC2, AGO2, BICD	1203	30	7937	0.87969	1	0.999996	100
GOTERM_BP_FAT	GO:0007097~nuclear migration	3	0.102041	0.883503	APC2, AGO2, BICD	1203	23	7937	0.860566	1	0.999998	100
GOTERM_BP_FAT	GO:0040023~establishment of nucleus localization	3	0.102041	0.921448	APC2, AGO2, BICD	1203	26	7937	0.76127	1	1	100
GOTERM_BP_FAT	GO:0051640~organelle localization	7	0.238095	0.989877	BSG, APC2, AUR, CENP-C, ASP, AGO2, BICD	1203	82	7937	0.563216	1	1	100
GOTERM_BP_FAT	GO:0051656~establishment of organelle localization	6	0.204082	0.992507	APC2, AUR, CENP-C, ASP, AGO2, BICD	1203	75	7937	0.527814	1	1	100
Annotation Cluster 118	Enrichment Score: 0.06757427099288169
Category	Term	Count	%	PValue	Genes	List Total	Pop Hits	Pop Total	Fold Enrichment	Bonferroni	Benjamini	FDR
GOTERM_BP_FAT	GO:0007616~long-term memory	4	0.136054	0.668965	AS, ADF1, CAMKII, ARMI	1203	22	7937	1.19958	1	0.999876	100
GOTERM_BP_FAT	GO:0007613~memory	5	0.170068	0.816314	AS, ADF1, CAMKII, ARMI, APKC	1203	36	7937	0.916343	1	0.99999	100
GOTERM_BP_FAT	GO:0007611~learning or memory	7	0.238095	0.982749	AS, ADF1, CAMKII, ARMI, 14-3-3ZETA, APKC, 14-3-3EPSILON	1203	77	7937	0.599788	1	1	100
GOTERM_BP_FAT	GO:0050890~cognition	11	0.37415	1	CAMTA, AS, CAM, ADF1, BTV, CAMKII, ARMI, 14-3-3ZETA, APKC, CDSA, 14-3-3EPSILON	1203	350	7937	0.207355	1	1	100
Annotation Cluster 119	Enrichment Score: 0.06347218029526676
Category	Term	Count	%	PValue	Genes	List Total	Pop Hits	Pop Total	Fold Enrichment	Bonferroni	Benjamini	FDR
GOTERM_BP_FAT	GO:0006812~cation transport	38	1.29252	0.609917	CG32000, CG32810, CG14647, CG11655, ATPSYN-GAMMA, BLW, ATPSYN-BETA, CG10006, CG6672, CG31729, CG34396, CG4334, CA-P60A, CCS, CG32669, CG6230, ATP7, CG13568, CG3476, CG5130, ATPSYN-D, CG10444, ATPSYN-B, ATPALPHA, CG42340, CG10465, CG2177, CG33181, CG11163, CATSUP, CG11739, CG13762, ATPSYN-CF6, CG16868, CG1746, CG3321, CG13189, CG15094	1203	252	7937	0.994887	1	0.999715	100
GOTERM_BP_FAT	GO:0030001~metal ion transport	21	0.714286	0.888342	CG32810, CG14647, CG10444, ATPALPHA, CG11655, CG10465, CG42340, CG2177, CATSUP, CG13762, CG10006, CG16868, CG34396, CG4334, CA-P60A, CCS, CG32669, ATP7, CG13568, CG13189, CG15094	1203	165	7937	0.839704	1	0.999998	100
GOTERM_BP_FAT	GO:0006811~ion transport	45	1.53061	0.916275	CG32000, CG32810, CG14647, BIB, CG11655, ATPSYN-GAMMA, BLW, ATPSYN-BETA, CG10006, CG6672, CG31729, CG34396, CG4334, CA-P60A, CCS, CG32669, CG6230, CG3476, ATP7, CG13568, CG5130, ATPSYN-D, CG10444, ATPSYN-B, ATPALPHA, CG42340, CG10465, CG2177, CG33181, CG11163, CATSUP, CG1907, CG11739, CG34123, CG13762, ATPSYN-CF6, CG16868, CG1746, CG12279, CG3321, CG3036, CG3638, CG5284, CG13189, CG15094	1203	346	7937	0.858079	1	0.999999	100
GOTERM_BP_FAT	GO:0015672~monovalent inorganic cation transport	19	0.646259	0.977103	CG32810, CG14647, CG10444, ATPSYN-D, ATPSYN-B, ATPSYN-GAMMA, ATPALPHA, CG11655, CG10465, CG42340, BLW, ATPSYN-BETA, ATPSYN-CF6, CG1746, CG3321, CG34396, CG32669, CG13568, CG15094	1203	175	7937	0.716319	1	1	100
GOTERM_MF_FAT	GO:0046873~metal ion transmembrane transporter activity	19	0.646259	0.992708	CG32810, CG5130, CG14647, BIB, CG42340, CG10465, CG2177, CG11163, CATSUP, CG13762, CG10006, CG6672, CG1688, CG34396, CG4334, CA-P60A, CG13568, ATP7, CG13189	1510	150	7918	0.664203	1	1	100
Annotation Cluster 120	Enrichment Score: 0.06048124009024465
Category	Term	Count	%	PValue	Genes	List Total	Pop Hits	Pop Total	Fold Enrichment	Bonferroni	Benjamini	FDR
GOTERM_BP_FAT	GO:0007291~sperm individualization	6	0.204082	0.484615	ACT5C, CBX, BG4, BRUCE, ARK, BETA4GALNACTA	1203	30	7937	1.31953	1	0.998441	99.999
GOTERM_BP_FAT	GO:0007286~spermatid development	9	0.306122	0.898997	ACT5C, CBX, BSG, BG4, BRUCE, ARK, BLW, BETA4GALNACTA, BEL	1203	75	7937	0.791721	1	0.999999	100
GOTERM_BP_FAT	GO:0048515~spermatid differentiation	9	0.306122	0.906741	ACT5C, CBX, BSG, BG4, BRUCE, ARK, BLW, BETA4GALNACTA, BEL	1203	76	7937	0.781303	1	0.999999	100
GOTERM_BP_FAT	GO:0007349~cellularization	10	0.340136	0.968042	ACT5C, BTK29A, CDC42, CBX, BG4, AGO1, BRUCE, AGO2, ARK, BETA4GALNACTA	1203	97	7937	0.680172	1	1	100
GOTERM_BP_FAT	GO:0007281~germ cell development	25	0.85034	0.994379	CAPU, CAPT, 14-3-3ZETA, BRUCE, ASP, BLW, BGCN, ACT5C, BOL, BG4, BICD, 14-3-3EPSILON, BLUE, BSG, BAI, CDC2, APKC, ALPHA-SPEC, ARK, ARM, CBX, ARMI, BTZ, BETA4GALNACTA, BEL	1203	243	7937	0.678773	1	1	100
GOTERM_BP_FAT	GO:0007283~spermatogenesis	14	0.47619	0.996032	BSG, CDC2, BRUCE, BLW, ARK, BGCN, ACT5C, CBX, BOL, BG4, ARF51F, ACHI, BEL, BETA4GALNACTA	1203	155	7937	0.595919	1	1	100
GOTERM_BP_FAT	GO:0048232~male gamete generation	14	0.47619	0.996032	BSG, CDC2, BRUCE, BLW, ARK, BGCN, ACT5C, CBX, BOL, BG4, ARF51F, ACHI, BEL, BETA4GALNACTA	1203	155	7937	0.595919	1	1	100
Annotation Cluster 121	Enrichment Score: 0.052407841363658385
Category	Term	Count	%	PValue	Genes	List Total	Pop Hits	Pop Total	Fold Enrichment	Bonferroni	Benjamini	FDR
GOTERM_BP_FAT	GO:0043297~apical junction assembly	4	0.136054	0.79873	ATPALPHA, APKC, ARM, BTSZ	1203	27	7937	0.977433	1	0.999985	100
GOTERM_BP_FAT	GO:0007043~cell-cell junction assembly	4	0.136054	0.837207	ATPALPHA, APKC, ARM, BTSZ	1203	29	7937	0.910024	1	0.999993	100
GOTERM_BP_FAT	GO:0034329~cell junction assembly	4	0.136054	0.853947	ATPALPHA, APKC, ARM, BTSZ	1203	30	7937	0.87969	1	0.999996	100
GOTERM_BP_FAT	GO:0045216~cell-cell junction organization	4	0.136054	0.916884	ATPALPHA, APKC, ARM, BTSZ	1203	35	7937	0.75402	1	0.999999	100
GOTERM_BP_FAT	GO:0034330~cell junction organization	4	0.136054	0.926027	ATPALPHA, APKC, ARM, BTSZ	1203	36	7937	0.733075	1	1	100
GOTERM_BP_FAT	GO:0016331~morphogenesis of embryonic epithelium	7	0.238095	0.999887	BTK29A, CDC42, APKC, ARM, BSK, CBT, BTSZ	1203	120	7937	0.384864	1	1	100
Annotation Cluster 122	Enrichment Score: 0.05231681919503057
Category	Term	Count	%	PValue	Genes	List Total	Pop Hits	Pop Total	Fold Enrichment	Bonferroni	Benjamini	FDR
GOTERM_BP_FAT	GO:0030031~cell projection assembly	8	0.272109	0.881187	CDC42, ARC-P20, CG3259, CG1399, ARC-P34, ABI, CG13178, CG11048	1203	65	7937	0.812021	1	0.999998	100
GOTERM_BP_FAT	GO:0042384~cilium assembly	4	0.136054	0.882961	CG3259, CG1399, CG13178, CG11048	1203	32	7937	0.824709	1	0.999998	100
GOTERM_BP_FAT	GO:0060271~cilium morphogenesis	4	0.136054	0.895447	CG3259, CG1399, CG13178, CG11048	1203	33	7937	0.799718	1	0.999999	100
Annotation Cluster 123	Enrichment Score: 0.047494320874848055
Category	Term	Count	%	PValue	Genes	List Total	Pop Hits	Pop Total	Fold Enrichment	Bonferroni	Benjamini	FDR
GOTERM_BP_FAT	GO:0007015~actin filament organization	11	0.37415	0.82696	CG17471, CDC42, ARC-P20, ALIX, CAPU, CAPT, CED-12, ASP, ACTN, ARP66B, BTSZ	1203	83	7937	0.87439	1	0.999992	100
GOTERM_BP_FAT	GO:0030036~actin cytoskeleton organization	17	0.578231	0.931138	ARC-P20, ALIX, CAPU, CAPT, CANB2, ASP, ARC-P34, ACTN, CALPA, BTK29A, CG17471, CDC42, CED-12, CG32138, ABI, ARP66B, BTSZ	1203	143	7937	0.784339	1	1	100
GOTERM_BP_FAT	GO:0030029~actin filament-based process	17	0.578231	0.935446	ARC-P20, ALIX, CAPU, CAPT, CANB2, ASP, ARC-P34, ACTN, CALPA, BTK29A, CG17471, CDC42, CED-12, CG32138, ABI, ARP66B, BTSZ	1203	144	7937	0.778892	1	1	100
Annotation Cluster 124	Enrichment Score: 0.043381440769140224
Category	Term	Count	%	PValue	Genes	List Total	Pop Hits	Pop Total	Fold Enrichment	Bonferroni	Benjamini	FDR
GOTERM_BP_FAT	GO:0045793~positive regulation of cell size	3	0.102041	0.829162	AKT1, BUN, BTSZ	1203	20	7937	0.989651	1	0.999992	100
GOTERM_BP_FAT	GO:0045927~positive regulation of growth	4	0.136054	0.869163	AKT1, BABO, BUN, BTSZ	1203	31	7937	0.851313	1	0.999997	100
GOTERM_BP_FAT	GO:0001558~regulation of cell growth	4	0.136054	0.882961	AKT1, BIF, BUN, CDK4	1203	32	7937	0.824709	1	0.999998	100
GOTERM_BP_FAT	GO:0040008~regulation of growth	11	0.37415	0.960898	AKT1, AGO, BIF, BRK, BONSAI, ALPHA-SPEC, BABO, BUN, CDK4, BETA-SPEC, BTSZ	1203	103	7937	0.704606	1	1	100
GOTERM_BP_FAT	GO:0008361~regulation of cell size	6	0.204082	0.992507	AKT1, BIF, BUN, CDK4, BSK, BTSZ	1203	75	7937	0.527814	1	1	100
Annotation Cluster 125	Enrichment Score: 0.04226614682265172
Category	Term	Count	%	PValue	Genes	List Total	Pop Hits	Pop Total	Fold Enrichment	Bonferroni	Benjamini	FDR
GOTERM_BP_FAT	GO:0048190~wing disc dorsal/ventral pattern formation	7	0.238095	0.789574	ANNIX, CAPT, CG14073, CG11399, CBT, CG1943, 14-3-3EPSILON	1203	50	7937	0.923674	1	0.999983	100
GOTERM_BP_FAT	GO:0035222~wing disc pattern formation	9	0.306122	0.8285	ANNIX, CAPT, BI, CG14073, CG11399, CAD99C, CBT, CG1943, 14-3-3EPSILON	1203	68	7937	0.873221	1	0.999992	100
GOTERM_BP_FAT	GO:0007447~imaginal disc pattern formation	12	0.408163	0.879251	ANNIX, ABD-B, CAPT, BI, APC2, CG14073, CG11399, ABD-A, CAD99C, CBT, CG1943, 14-3-3EPSILON	1203	96	7937	0.824709	1	0.999998	100
GOTERM_BP_FAT	GO:0007450~dorsal/ventral pattern formation, imaginal disc	7	0.238095	0.881486	ANNIX, CAPT, CG14073, CG11399, CBT, CG1943, 14-3-3EPSILON	1203	57	7937	0.81024	1	0.999998	100
GOTERM_BP_FAT	GO:0009953~dorsal/ventral pattern formation	11	0.37415	0.997987	ANNIX, CACT, CAPT, BAI, CG14073, CG11399, CACTIN, CBT, BICD, CG1943, 14-3-3EPSILON	1203	135	7937	0.537588	1	1	100
GOTERM_BP_FAT	GO:0035220~wing disc development	20	0.680272	0.999996	BY, CAPT, ALPH, CG14073, CCT1, BABO, ARM, CAD99C, CG1943, BRM, ANNIX, CDC42, CG, BI, BOWL, BRK, CG11399, ASH2, CBT, 14-3-3EPSILON	1203	281	7937	0.469585	1	1	100
GOTERM_BP_FAT	GO:0003002~regionalization	33	1.12245	1	CAPU, ABD-B, CAPT, APC2, CACTIN, ABD-A, CAD99C, ANNIX, CACT, BI, BOWL, AGO1, AGO2, BRAT, 14-3-3EPSILON, BICD, BLUE, BTHD, BAI, CG14073, APKC, BUN, ARM, CDK4, CG1943, BRM, BRK, ARMI, CG11399, BTZ, ASH2, CBT, BOTV	1203	454	7937	0.479567	1	1	100
Annotation Cluster 126	Enrichment Score: 0.04001343565000874
Category	Term	Count	%	PValue	Genes	List Total	Pop Hits	Pop Total	Fold Enrichment	Bonferroni	Benjamini	FDR
GOTERM_MF_FAT	GO:0004003~ATP-dependent DNA helicase activity	3	0.102041	0.90174	CG11403, CG5899, CG4078	1510	19	7918	0.827954	1	0.999998	100
GOTERM_MF_FAT	GO:0003678~DNA helicase activity	6	0.204082	0.902169	CG11403, CDC45L, ARMI, CG5924, CG5899, CG4078	1510	40	7918	0.786556	1	0.999998	100
GOTERM_MF_FAT	GO:0008094~DNA-dependent ATPase activity	5	0.170068	0.932374	CG11403, BRM, CDC6, CG5899, CG4078	1510	36	7918	0.728293	1	0.999999	100
Annotation Cluster 127	Enrichment Score: 0.03992679821357168
Category	Term	Count	%	PValue	Genes	List Total	Pop Hits	Pop Total	Fold Enrichment	Bonferroni	Benjamini	FDR
GOTERM_BP_FAT	GO:0006916~anti-apoptosis	4	0.136054	0.636722	AKT1, AAC11, BRUCE, CG13393	1203	21	7937	1.2567	1	0.999797	100
GOTERM_BP_FAT	GO:0043066~negative regulation of apoptosis	6	0.204082	0.832551	AKT1, AAC11, CG17019, BRUCE, CG13393, BUN	1203	45	7937	0.87969	1	0.999993	100
GOTERM_BP_FAT	GO:0043069~negative regulation of programmed cell death	6	0.204082	0.893698	AKT1, AAC11, CG17019, BRUCE, CG13393, BUN	1203	50	7937	0.791721	1	0.999999	100
GOTERM_BP_FAT	GO:0060548~negative regulation of cell death	6	0.204082	0.927701	AKT1, AAC11, CG17019, BRUCE, CG13393, BUN	1203	54	7937	0.733075	1	1	100
GOTERM_BP_FAT	GO:0012502~induction of programmed cell death	3	0.102041	0.973649	ART4, BR, ARK	1203	34	7937	0.582148	1	1	100
GOTERM_BP_FAT	GO:0043068~positive regulation of programmed cell death	4	0.136054	0.97524	ART4, BR, ARK, CG5059	1203	45	7937	0.58646	1	1	100
GOTERM_BP_FAT	GO:0010942~positive regulation of cell death	4	0.136054	0.97524	ART4, BR, ARK, CG5059	1203	45	7937	0.58646	1	1	100
GOTERM_BP_FAT	GO:0043067~regulation of programmed cell death	10	0.340136	0.991218	ART4, AKT1, AAC11, CG17019, BR, BRUCE, CG13393, ARK, BUN, CG5059	1203	111	7937	0.594385	1	1	100
GOTERM_BP_FAT	GO:0010941~regulation of cell death	10	0.340136	0.994063	ART4, AKT1, AAC11, CG17019, BR, BRUCE, CG13393, ARK, BUN, CG5059	1203	115	7937	0.573711	1	1	100
GOTERM_BP_FAT	GO:0042981~regulation of apoptosis	8	0.272109	0.994407	AKT1, AAC11, CG17019, BRUCE, CG13393, ARK, BUN, CG5059	1203	97	7937	0.544138	1	1	100
Annotation Cluster 128	Enrichment Score: 0.03288142158295161
Category	Term	Count	%	PValue	Genes	List Total	Pop Hits	Pop Total	Fold Enrichment	Bonferroni	Benjamini	FDR
GOTERM_BP_FAT	GO:0007400~neuroblast fate determination	3	0.102041	0.91032	AC, ARM, ABD-A	1203	25	7937	0.791721	1	0.999999	100
GOTERM_BP_FAT	GO:0014017~neuroblast fate commitment	3	0.102041	0.931265	AC, ARM, ABD-A	1203	27	7937	0.733075	1	1	100
GOTERM_BP_FAT	GO:0014016~neuroblast differentiation	3	0.102041	0.939914	AC, ARM, ABD-A	1203	28	7937	0.706893	1	1	100
Annotation Cluster 129	Enrichment Score: 0.02979766776764063
Category	Term	Count	%	PValue	Genes	List Total	Pop Hits	Pop Total	Fold Enrichment	Bonferroni	Benjamini	FDR
GOTERM_BP_FAT	GO:0060341~regulation of cellular localization	8	0.272109	0.907359	BLUE, AKT1, BIC, CAM, CACT, CANB2, ARMI, BJ1	1203	68	7937	0.776197	1	0.999999	100
GOTERM_BP_FAT	GO:0007317~regulation of pole plasm oskar mRNA localization	3	0.102041	0.91032	BLUE, BIC, ARMI	1203	25	7937	0.791721	1	0.999999	100
GOTERM_BP_FAT	GO:0060281~regulation of oocyte development	3	0.102041	0.921448	BLUE, BIC, ARMI	1203	26	7937	0.76127	1	1	100
GOTERM_BP_FAT	GO:0045995~regulation of embryonic development	3	0.102041	0.998539	BLUE, BIC, ARMI	1203	54	7937	0.366537	1	1	100
Annotation Cluster 130	Enrichment Score: 0.025435125007892866
Category	Term	Count	%	PValue	Genes	List Total	Pop Hits	Pop Total	Fold Enrichment	Bonferroni	Benjamini	FDR
GOTERM_BP_FAT	GO:0030178~negative regulation of Wnt receptor signaling pathway	3	0.102041	0.829162	APC2, AXN, CG10225	1203	20	7937	0.989651	1	0.999992	100
GOTERM_BP_FAT	GO:0030111~regulation of Wnt receptor signaling pathway	3	0.102041	0.960071	APC2, AXN, CG10225	1203	31	7937	0.638484	1	1	100
GOTERM_BP_FAT	GO:0009968~negative regulation of signal transduction	8	0.272109	0.996746	CAM, AKAP200, APC2, ALPH, BRK, AXN, BUN, CG10225	1203	102	7937	0.517465	1	1	100
GOTERM_BP_FAT	GO:0010648~negative regulation of cell communication	8	0.272109	0.997085	CAM, AKAP200, APC2, ALPH, BRK, AXN, BUN, CG10225	1203	103	7937	0.512441	1	1	100
Annotation Cluster 131	Enrichment Score: 0.02499404189222711
Category	Term	Count	%	PValue	Genes	List Total	Pop Hits	Pop Total	Fold Enrichment	Bonferroni	Benjamini	FDR
GOTERM_BP_FAT	GO:0031098~stress-activated protein kinase signaling pathway	5	0.170068	0.711934	BTK29A, CDC42, ATF-2, BSK, CBT	1203	31	7937	1.06414	1	0.99994	100
GOTERM_BP_FAT	GO:0007243~protein kinase cascade	8	0.272109	0.824102	BTK29A, CDC42, CDC2C, CDK4, ATF-2, BSK, CDC37, CBT	1203	60	7937	0.87969	1	0.999991	100
GOTERM_BP_FAT	GO:0007254~JNK cascade	4	0.136054	0.837207	BTK29A, CDC42, BSK, CBT	1203	29	7937	0.910024	1	0.999993	100
GOTERM_BP_FAT	GO:0000165~MAPKKK cascade	5	0.170068	0.917427	BTK29A, CDC42, ATF-2, BSK, CBT	1203	44	7937	0.749736	1	0.999999	100
GOTERM_BP_FAT	GO:0007163~establishment or maintenance of cell polarity	9	0.306122	0.995733	ABS, CDC42, BRN, ALPHA-CAT, AUR, APKC, CCT1, CG17618, ARM	1203	109	7937	0.544762	1	1	100
GOTERM_BP_FAT	GO:0007164~establishment of tissue polarity	4	0.136054	0.997335	CCT1, BSK, CBT, BTSZ	1203	62	7937	0.425656	1	1	100
GOTERM_BP_FAT	GO:0001738~morphogenesis of a polarized epithelium	4	0.136054	0.999113	APKC, CCT1, BSK, CBT	1203	70	7937	0.37701	1	1	100
GOTERM_BP_FAT	GO:0001736~establishment of planar polarity	3	0.102041	0.999487	CCT1, BSK, CBT	1203	61	7937	0.324476	1	1	100
GOTERM_BP_FAT	GO:0007391~dorsal closure	5	0.170068	0.999851	BTK29A, CDC42, ARM, BSK, CBT	1203	95	7937	0.347246	1	1	100
GOTERM_BP_FAT	GO:0016331~morphogenesis of embryonic epithelium	7	0.238095	0.999887	BTK29A, CDC42, APKC, ARM, BSK, CBT, BTSZ	1203	120	7937	0.384864	1	1	100
GOTERM_BP_FAT	GO:0048598~embryonic morphogenesis	15	0.510204	0.999992	AMX, APC2, APKC, ARM, ABD-A, BSK, C15, BTK29A, CDC42, BRN, 18W, BOWL, BARR, CBT, BTSZ	1203	226	7937	0.437899	1	1	100
GOTERM_BP_FAT	GO:0060429~epithelium development	13	0.442177	1	APKC, CCT1, CG1298, ARM, BSK, BTK29A, CDC42, BRN, BARR, CG17618, CBT, CDSA, BTSZ	1203	235	7937	0.364978	1	1	100
GOTERM_BP_FAT	GO:0048729~tissue morphogenesis	13	0.442177	1	APKC, CCT1, ARM, ABD-A, BSK, C15, BTK29A, CDC42, BRN, BARR, CBT, CDSA, BTSZ	1203	247	7937	0.347246	1	1	100
GOTERM_BP_FAT	GO:0002009~morphogenesis of an epithelium	11	0.37415	1	BTK29A, CDC42, BRN, APKC, CCT1, BARR, ARM, BSK, CBT, BTSZ, CDSA	1203	225	7937	0.322553	1	1	100
Annotation Cluster 132	Enrichment Score: 0.020028318018740058
Category	Term	Count	%	PValue	Genes	List Total	Pop Hits	Pop Total	Fold Enrichment	Bonferroni	Benjamini	FDR
GOTERM_BP_FAT	GO:0010259~multicellular organismal aging	10	0.340136	0.95493	CG6673, BTK29A, BTHD, ATPALPHA, ALPHA-MAN-I, CAR, CCT1, CAT, CDK5, ATG8A	1203	93	7937	0.709427	1	1	100
GOTERM_BP_FAT	GO:0008340~determination of adult life span	10	0.340136	0.95493	CG6673, BTK29A, BTHD, ATPALPHA, ALPHA-MAN-I, CAR, CCT1, CAT, CDK5, ATG8A	1203	93	7937	0.709427	1	1	100
GOTERM_BP_FAT	GO:0007568~aging	10	0.340136	0.95493	CG6673, BTK29A, BTHD, ATPALPHA, ALPHA-MAN-I, CAR, CCT1, CAT, CDK5, ATG8A	1203	93	7937	0.709427	1	1	100
Annotation Cluster 133	Enrichment Score: 0.018108109837787413
Category	Term	Count	%	PValue	Genes	List Total	Pop Hits	Pop Total	Fold Enrichment	Bonferroni	Benjamini	FDR
GOTERM_BP_FAT	GO:0006813~potassium ion transport	6	0.204082	0.801088	CG32810, CG14647, CG34396, ATPALPHA, CG42340, CG10465	1203	43	7937	0.920605	1	0.999985	100
GOTERM_MF_FAT	GO:0005267~potassium channel activity	6	0.204082	0.803724	CG32810, CG14647, CG1688, CG34396, CG42340, CG10465	1510	34	7918	0.92536	1	0.99996	100
GOTERM_MF_FAT	GO:0005249~voltage-gated potassium channel activity	4	0.136054	0.934424	CG32810, CG14647, CG34396, CG10465	1510	29	7918	0.72327	1	0.999999	100
GOTERM_MF_FAT	GO:0022843~voltage-gated cation channel activity	4	0.136054	0.99049	CG32810, CG14647, CG34396, CG10465	1510	41	7918	0.511581	1	1	100
GOTERM_MF_FAT	GO:0005244~voltage-gated ion channel activity	5	0.170068	0.991527	CG32810, CG14647, CG5284, CG34396, CG10465	1510	50	7918	0.524371	1	1	100
GOTERM_MF_FAT	GO:0022832~voltage-gated channel activity	5	0.170068	0.991527	CG32810, CG14647, CG5284, CG34396, CG10465	1510	50	7918	0.524371	1	1	100
GOTERM_MF_FAT	GO:0046873~metal ion transmembrane transporter activity	19	0.646259	0.992708	CG32810, CG5130, CG14647, BIB, CG42340, CG10465, CG2177, CG11163, CATSUP, CG13762, CG10006, CG6672, CG1688, CG34396, CG4334, CA-P60A, CG13568, ATP7, CG13189	1510	150	7918	0.664203	1	1	100
GOTERM_MF_FAT	GO:0005261~cation channel activity	9	0.306122	0.999963	CG32810, CG14647, BIB, CG1688, CG34396, CG42340, CG10465, CG13568, CG13762	1510	118	7918	0.399944	1	1	100
GOTERM_MF_FAT	GO:0005216~ion channel activity	13	0.442177	0.999999	CG32810, CG14647, BIB, CG42340, CG10465, CG34123, CG13762, BEST1, CG1688, CG5284, CG34396, CG3638, CG13568	1510	175	7918	0.389533	1	1	100
GOTERM_MF_FAT	GO:0022838~substrate specific channel activity	13	0.442177	1	CG32810, CG14647, BIB, CG42340, CG10465, CG34123, CG13762, BEST1, CG1688, CG5284, CG34396, CG3638, CG13568	1510	180	7918	0.378712	1	1	100
GOTERM_MF_FAT	GO:0015267~channel activity	13	0.442177	1	CG32810, CG14647, BIB, CG42340, CG10465, CG34123, CG13762, BEST1, CG1688, CG5284, CG34396, CG3638, CG13568	1510	187	7918	0.364536	1	1	100
GOTERM_MF_FAT	GO:0022803~passive transmembrane transporter activity	13	0.442177	1	CG32810, CG14647, BIB, CG42340, CG10465, CG34123, CG13762, BEST1, CG1688, CG5284, CG34396, CG3638, CG13568	1510	187	7918	0.364536	1	1	100
GOTERM_MF_FAT	GO:0022836~gated channel activity	5	0.170068	1	CG32810, CG14647, CG5284, CG34396, CG10465	1510	116	7918	0.226022	1	1	100
Annotation Cluster 134	Enrichment Score: 0.016437354705043823
Category	Term	Count	%	PValue	Genes	List Total	Pop Hits	Pop Total	Fold Enrichment	Bonferroni	Benjamini	FDR
GOTERM_BP_FAT	GO:0046843~dorsal appendage formation	5	0.170068	0.816314	CDC42, CACT, ARMI, BUN, BSK	1203	36	7937	0.916343	1	0.99999	100
GOTERM_BP_FAT	GO:0007306~eggshell chorion assembly	6	0.204082	0.985169	CDC42, CACT, ARMI, CAF1, BUN, BSK	1203	69	7937	0.573711	1	1	100
GOTERM_BP_FAT	GO:0010927~cellular component assembly involved in morphogenesis	7	0.238095	0.995828	CDC42, CACT, CANB2, ARMI, CAF1, BUN, BSK	1203	90	7937	0.513152	1	1	100
GOTERM_BP_FAT	GO:0007304~chorion-containing eggshell formation	7	0.238095	0.997358	CDC42, CAPU, CACT, ARMI, CAF1, BUN, BSK	1203	94	7937	0.491316	1	1	100
GOTERM_BP_FAT	GO:0030703~eggshell formation	7	0.238095	0.997646	CDC42, CAPU, CACT, ARMI, CAF1, BUN, BSK	1203	95	7937	0.486144	1	1	100
GOTERM_BP_FAT	GO:0030707~ovarian follicle cell development	13	0.442177	0.999991	CAPU, BIB, ALPHA-SPEC, BUN, ARM, BSK, CDC42, BRN, AB, CACT, CED-12, ARMI, CAF1	1203	204	7937	0.42044	1	1	100
Annotation Cluster 135	Enrichment Score: 0.015597886455386354
Category	Term	Count	%	PValue	Genes	List Total	Pop Hits	Pop Total	Fold Enrichment	Bonferroni	Benjamini	FDR
GOTERM_MF_FAT	GO:0004180~carboxypeptidase activity	6	0.204082	0.948129	CG31019, CG2915, CG2493, CG32627, CG18659, CG4572	1510	45	7918	0.699161	1	1	100
GOTERM_MF_FAT	GO:0004181~metallocarboxypeptidase activity	3	0.102041	0.971001	CG31019, CG2915, CG32627	1510	26	7918	0.605043	1	1	100
GOTERM_MF_FAT	GO:0008235~metalloexopeptidase activity	5	0.170068	0.975257	CG31019, CG13630, CG2915, CG5188, CG32627	1510	43	7918	0.609734	1	1	100
Annotation Cluster 136	Enrichment Score: 0.01531909837651129
Category	Term	Count	%	PValue	Genes	List Total	Pop Hits	Pop Total	Fold Enrichment	Bonferroni	Benjamini	FDR
GOTERM_BP_FAT	GO:0009266~response to temperature stimulus	8	0.272109	0.940036	CG4164, CG11035, CG14207, CG5001, ATPALPHA, CDK9, CG14650, ADAR	1203	73	7937	0.723033	1	1	100
GOTERM_BP_FAT	GO:0009408~response to heat	7	0.238095	0.957043	CG4164, CG11035, CG14207, CG5001, CDK9, CG14650, ADAR	1203	68	7937	0.679172	1	1	100
GOTERM_BP_FAT	GO:0009628~response to abiotic stimulus	16	0.544218	0.999923	CAMTA, CG14207, CAM, ATPALPHA, CDK9, ARK, ATF-2, CG4164, CG11035, ADP, BTV, CG5001, CDSA, CG14650, 14-3-3EPSILON, ADAR	1203	214	7937	0.493284	1	1	100
Annotation Cluster 137	Enrichment Score: 0.011583010295250842
Category	Term	Count	%	PValue	Genes	List Total	Pop Hits	Pop Total	Fold Enrichment	Bonferroni	Benjamini	FDR
GOTERM_BP_FAT	GO:0016056~rhodopsin mediated signaling pathway	3	0.102041	0.752962	CAMTA, CAM, CDSA	1203	17	7937	1.1643	1	0.999969	100
GOTERM_BP_FAT	GO:0007602~phototransduction	3	0.102041	0.994514	CAMTA, CAM, CDSA	1203	45	7937	0.439845	1	1	100
GOTERM_BP_FAT	GO:0009583~detection of light stimulus	3	0.102041	0.997722	CAMTA, CAM, CDSA	1203	51	7937	0.388098	1	1	100
GOTERM_BP_FAT	GO:0009582~detection of abiotic stimulus	3	0.102041	0.998915	CAMTA, CAM, CDSA	1203	56	7937	0.353447	1	1	100
GOTERM_BP_FAT	GO:0009581~detection of external stimulus	3	0.102041	0.999487	CAMTA, CAM, CDSA	1203	61	7937	0.324476	1	1	100
GOTERM_BP_FAT	GO:0007601~visual perception	3	0.102041	0.999869	CAMTA, CAM, CDSA	1203	70	7937	0.282757	1	1	100
GOTERM_BP_FAT	GO:0050953~sensory perception of light stimulus	3	0.102041	0.999887	CAMTA, CAM, CDSA	1203	71	7937	0.278775	1	1	100
GOTERM_BP_FAT	GO:0009314~response to radiation	5	0.170068	0.999988	CAMTA, CAM, ARK, CDSA, 14-3-3EPSILON	1203	113	7937	0.291932	1	1	100
GOTERM_BP_FAT	GO:0051606~detection of stimulus	3	0.102041	0.999999	CAMTA, CAM, CDSA	1203	100	7937	0.19793	1	1	100
GOTERM_BP_FAT	GO:0009416~response to light stimulus	3	0.102041	0.999999	CAMTA, CAM, CDSA	1203	100	7937	0.19793	1	1	100
GOTERM_BP_FAT	GO:0007600~sensory perception	4	0.136054	1	CAMTA, CAM, BTV, CDSA	1203	276	7937	0.0956184	1	1	100
Annotation Cluster 138	Enrichment Score: 0.010154624908003552
Category	Term	Count	%	PValue	Genes	List Total	Pop Hits	Pop Total	Fold Enrichment	Bonferroni	Benjamini	FDR
GOTERM_BP_FAT	GO:0050767~regulation of neurogenesis	7	0.238095	0.952659	CDC42, BIF, ALPH, AUR, BJ1, APKC, BRAT	1203	67	7937	0.689309	1	1	100
GOTERM_BP_FAT	GO:0051960~regulation of nervous system development	9	0.306122	0.972218	CDC42, BIF, ALPH, AUR, BJ1, APKC, ALPHA-SPEC, BRAT, BETA-SPEC	1203	90	7937	0.659767	1	1	100
GOTERM_BP_FAT	GO:0060284~regulation of cell development	13	0.442177	0.984726	BLUE, BIC, BIF, ALPH, AUR, APKC, ALPHA-SPEC, ARK, BETA-SPEC, CDC42, ARMI, BJ1, BRAT	1203	131	7937	0.654731	1	1	100
GOTERM_BP_FAT	GO:0045664~regulation of neuron differentiation	3	0.102041	0.998539	CDC42, BIF, ALPH	1203	54	7937	0.366537	1	1	100
Annotation Cluster 139	Enrichment Score: 0.009502802676379289
Category	Term	Count	%	PValue	Genes	List Total	Pop Hits	Pop Total	Fold Enrichment	Bonferroni	Benjamini	FDR
GOTERM_BP_FAT	GO:0009719~response to endogenous stimulus	4	0.136054	0.968221	ART4, AKT1, BR, CG5315	1203	43	7937	0.613737	1	1	100
GOTERM_BP_FAT	GO:0009725~response to hormone stimulus	4	0.136054	0.968221	ART4, AKT1, BR, CG5315	1203	43	7937	0.613737	1	1	100
GOTERM_BP_FAT	GO:0010033~response to organic substance	9	0.306122	0.998947	ART4, AKT1, BR, ADHR, AGO1, CBP80, AGO2, ADH, CG5315, CBP20	1203	122	7937	0.486714	1	1	100
Annotation Cluster 140	Enrichment Score: 0.004859268341990555
Category	Term	Count	%	PValue	Genes	List Total	Pop Hits	Pop Total	Fold Enrichment	Bonferroni	Benjamini	FDR
GOTERM_BP_FAT	GO:0016358~dendrite development	14	0.47619	0.91717	ARC42, BAP55, CG5343, BON, BABO, BIGMAX, BRM, ASF1, CDC42, AB, ADF1, CAF1, BAP60, ACF1	1203	117	7937	0.789465	1	0.999999	100
GOTERM_BP_FAT	GO:0048813~dendrite morphogenesis	14	0.47619	0.91717	ARC42, BAP55, CG5343, BON, BABO, BIGMAX, BRM, ASF1, CDC42, AB, ADF1, CAF1, BAP60, ACF1	1203	117	7937	0.789465	1	0.999999	100
GOTERM_BP_FAT	GO:0007411~axon guidance	11	0.37415	0.998182	CDC42, BIF, AB, APC2, ALPHA-SPEC, BABO, CDGAPR, CDK5, CG33960, BETA-SPEC, BUR	1203	136	7937	0.533635	1	1	100
GOTERM_BP_FAT	GO:0007409~axonogenesis	17	0.578231	0.999117	BIF, APC2, ALPHA-SPEC, BABO, ADA2B, CDK5, CG33960, BSK, BETA-SPEC, BUR, BRM, CDC42, AB, ABI, BEN, CDGAPR, ARP66B	1203	198	7937	0.566467	1	1	100
GOTERM_BP_FAT	GO:0048812~neuron projection morphogenesis	27	0.918367	0.999248	BIF, APC2, CG5343, BABO, ADA2B, CG33960, BETA-SPEC, CDC42, ADF1, CAF1, BAP60, ACF1, ARC42, BAP55, BON, ALPHA-SPEC, CDK5, BIGMAX, BSK, BUR, BRM, ASF1, AB, ABI, BEN, CDGAPR, ARP66B	1203	286	7937	0.622857	1	1	100
GOTERM_BP_FAT	GO:0048858~cell projection morphogenesis	31	1.05442	0.999288	CG3259, BIF, APC2, CG5343, BABO, ADA2B, CG33960, BETA-SPEC, CDC42, ADF1, CG1399, CAF1, BAP60, CG13178, ACF1, ARC42, BAP55, BON, ALPHA-SPEC, CDK5, BSK, BIGMAX, BUR, CG11048, BRM, ASF1, AB, ABI, CDGAPR, BEN, ARP66B	1203	320	7937	0.63915	1	1	100
GOTERM_BP_FAT	GO:0031175~neuron projection development	27	0.918367	0.999306	BIF, APC2, CG5343, BABO, ADA2B, CG33960, BETA-SPEC, CDC42, ADF1, CAF1, BAP60, ACF1, ARC42, BAP55, BON, ALPHA-SPEC, CDK5, BIGMAX, BSK, BUR, BRM, ASF1, AB, ABI, BEN, CDGAPR, ARP66B	1203	287	7937	0.620687	1	1	100
GOTERM_BP_FAT	GO:0048667~cell morphogenesis involved in neuron differentiation	27	0.918367	0.999359	BIF, APC2, CG5343, BABO, ADA2B, CG33960, BETA-SPEC, CDC42, ADF1, CAF1, BAP60, ACF1, ARC42, BAP55, BON, ALPHA-SPEC, CDK5, BIGMAX, BSK, BUR, BRM, ASF1, AB, ABI, BEN, CDGAPR, ARP66B	1203	288	7937	0.618532	1	1	100
GOTERM_BP_FAT	GO:0032990~cell part morphogenesis	31	1.05442	0.999697	CG3259, BIF, APC2, CG5343, BABO, ADA2B, CG33960, BETA-SPEC, CDC42, ADF1, CG1399, CAF1, BAP60, CG13178, ACF1, ARC42, BAP55, BON, ALPHA-SPEC, CDK5, BSK, BIGMAX, BUR, CG11048, BRM, ASF1, AB, ABI, CDGAPR, BEN, ARP66B	1203	331	7937	0.617909	1	1	100
GOTERM_BP_FAT	GO:0000904~cell morphogenesis involved in differentiation	27	0.918367	0.999814	BIF, APC2, CG5343, BABO, ADA2B, CG33960, BETA-SPEC, CDC42, ADF1, CAF1, BAP60, ACF1, ARC42, BAP55, BON, ALPHA-SPEC, CDK5, BIGMAX, BSK, BUR, BRM, ASF1, AB, ABI, BEN, CDGAPR, ARP66B	1203	303	7937	0.587911	1	1	100
GOTERM_BP_FAT	GO:0030030~cell projection organization	33	1.12245	0.999924	CG3259, BIF, APC2, CG5343, BABO, ARC-P34, ADA2B, CG33960, BETA-SPEC, CDC42, ADF1, CG1399, CAF1, BAP60, CG13178, ACF1, ARC-P20, ARC42, BAP55, BON, ALPHA-SPEC, CDK5, BSK, BIGMAX, BUR, CG11048, BRM, ASF1, AB, ABI, CDGAPR, BEN, ARP66B	1203	365	7937	0.596502	1	1	100
GOTERM_BP_FAT	GO:0000902~cell morphogenesis	40	1.36054	0.999982	BIF, CG3259, CAPT, APC2, AUR, CG5343, CCT1, BABO, ADA2B, CG33960, BETA-SPEC, CDC42, ADF1, CG1399, CAF1, BAP60, CG17618, ACF1, CG13178, ABS, ARC42, BAP55, APKC, ALPHA-SPEC, BON, ARM, CDK5, BSK, BIGMAX, CG11048, BUR, BRM, ASF1, AB, BRN, ALPHA-CAT, ABI, CDGAPR, BEN, ARP66B	1203	442	7937	0.597074	1	1	100
GOTERM_BP_FAT	GO:0048666~neuron development	28	0.952381	0.999992	BIF, APC2, CG5343, BABO, ADA2B, CG33960, BETA-SPEC, AMPH, CDC42, ADF1, CAF1, BAP60, ACF1, ARC42, BAP55, BON, ALPHA-SPEC, CDK5, BSK, BIGMAX, BUR, BRM, ASF1, AB, ABI, BEN, CDGAPR, ARP66B	1203	347	7937	0.532377	1	1	100
GOTERM_BP_FAT	GO:0006928~cell motion	21	0.714286	0.999999	ABD-B, BIF, CG10083, APC2, ALPHA-SPEC, BABO, BUN, CDK5, ABD-A, CG33960, BSK, BETA-SPEC, BUR, AKT1, AWD, CDC42, BRN, AB, CED-12, AFT, CDGAPR	1203	305	7937	0.454266	1	1	100
GOTERM_BP_FAT	GO:0030182~neuron differentiation	32	1.08844	0.999999	BIF, APC2, BR, 14-3-3ZETA, CG5343, BABO, ADA2B, CG33960, BETA-SPEC, AMPH, CDC42, ADF1, CAF1, BAP60, ACF1, ARC42, BAP55, BON, ALPHA-SPEC, BUN, ARM, CDK5, BSK, BIGMAX, BUR, BRM, ASF1, AB, ABI, CDGAPR, BEN, ARP66B	1203	409	7937	0.516199	1	1	100
GOTERM_BP_FAT	GO:0032989~cellular component morphogenesis	44	1.4966	0.999999	BIF, CG3259, CAPT, CANB2, APC2, AUR, CG5343, CCT1, BABO, ADA2B, CG33960, BETA-SPEC, CDC42, CACT, ADF1, CG1399, CAF1, BAP60, CG17618, ACF1, CG13178, ABS, ARC42, BAP55, APKC, ALPHA-SPEC, BON, BUN, ARM, CDK5, BSK, BIGMAX, CG11048, BUR, ASF1, BRM, AB, BRN, ALPHA-CAT, ARMI, ABI, CDGAPR, BEN, ARP66B	1203	518	7937	0.56042	1	1	100
Annotation Cluster 141	Enrichment Score: 0.0047009557313817014
Category	Term	Count	%	PValue	Genes	List Total	Pop Hits	Pop Total	Fold Enrichment	Bonferroni	Benjamini	FDR
GOTERM_BP_FAT	GO:0055080~cation homeostasis	3	0.102041	0.969712	CG6136, ATP7, CG1598	1203	33	7937	0.599788	1	1	100
GOTERM_BP_FAT	GO:0050801~ion homeostasis	4	0.136054	0.986908	CG6136, ATP7, ADAR, CG1598	1203	50	7937	0.527814	1	1	100
GOTERM_BP_FAT	GO:0006873~cellular ion homeostasis	3	0.102041	0.993658	ATP7, ADAR, CG1598	1203	44	7937	0.449841	1	1	100
GOTERM_BP_FAT	GO:0055082~cellular chemical homeostasis	3	0.102041	0.997722	ATP7, ADAR, CG1598	1203	51	7937	0.388098	1	1	100
GOTERM_BP_FAT	GO:0048878~chemical homeostasis	4	0.136054	0.998457	CG6136, ATP7, ADAR, CG1598	1203	66	7937	0.399859	1	1	100
Annotation Cluster 142	Enrichment Score: 0.0038805780726117135
Category	Term	Count	%	PValue	Genes	List Total	Pop Hits	Pop Total	Fold Enrichment	Bonferroni	Benjamini	FDR
GOTERM_BP_FAT	GO:0006351~transcription, DNA-dependent	14	0.47619	0.974373	ARC42, CG33097, CDK8, CG40127, CDK9, CG3756, CDK7, CAZ, CG17209, CG5147, CG5380, CG12267, BRF, BRAT	1203	133	7937	0.694492	1	1	100
GOTERM_BP_FAT	GO:0032774~RNA biosynthetic process	14	0.47619	0.97981	ARC42, CG33097, CDK8, CG40127, CDK9, CG3756, CDK7, CAZ, CG17209, CG5147, CG5380, CG12267, BRF, BRAT	1203	136	7937	0.679172	1	1	100
GOTERM_BP_FAT	GO:0006352~transcription initiation	5	0.170068	0.997283	CAZ, ARC42, CDK8, BRF, CDK7	1203	73	7937	0.451895	1	1	100
GOTERM_MF_FAT	GO:0016251~general RNA polymerase II transcription factor activity	9	0.306122	0.997327	BRM, CAZ, ARC42, ADF1, CDK8, BAP60, CDK7, BIP2, CG16903	1510	89	7918	0.530263	1	1	100
GOTERM_BP_FAT	GO:0006367~transcription initiation from RNA polymerase II promoter	4	0.136054	0.99823	CAZ, ARC42, CDK8, CDK7	1203	65	7937	0.406011	1	1	100
GOTERM_BP_FAT	GO:0006366~transcription from RNA polymerase II promoter	5	0.170068	0.999914	CAZ, ARC42, CDK8, CDK9, CDK7	1203	99	7937	0.333216	1	1	100
Annotation Cluster 143	Enrichment Score: 0.003418992445030124
Category	Term	Count	%	PValue	Genes	List Total	Pop Hits	Pop Total	Fold Enrichment	Bonferroni	Benjamini	FDR
GOTERM_BP_FAT	GO:0051170~nuclear import	3	0.102041	0.982713	CG10320, CDM, CG32164	1203	37	7937	0.534946	1	1	100
GOTERM_BP_FAT	GO:0006913~nucleocytoplasmic transport	5	0.170068	0.996915	CG10320, CDM, CG32164, CG32135, CG14749	1203	72	7937	0.458172	1	1	100
GOTERM_BP_FAT	GO:0051169~nuclear transport	5	0.170068	0.996915	CG10320, CDM, CG32164, CG32135, CG14749	1203	72	7937	0.458172	1	1	100
Annotation Cluster 144	Enrichment Score: 0.0030803288445703457
Category	Term	Count	%	PValue	Genes	List Total	Pop Hits	Pop Total	Fold Enrichment	Bonferroni	Benjamini	FDR
GOTERM_BP_FAT	GO:0002164~larval development	6	0.204082	0.983422	BLP, APC2, ALPHA-SPEC, ATP7, BEL, ALH	1203	68	7937	0.582148	1	1	100
GOTERM_BP_FAT	GO:0042303~molting cycle	3	0.102041	0.997722	APC2, ATP7, ALH	1203	51	7937	0.388098	1	1	100
GOTERM_BP_FAT	GO:0018988~molting cycle, protein-based cuticle	3	0.102041	0.997722	APC2, ATP7, ALH	1203	51	7937	0.388098	1	1	100
Annotation Cluster 145	Enrichment Score: 0.0013356872131587696
Category	Term	Count	%	PValue	Genes	List Total	Pop Hits	Pop Total	Fold Enrichment	Bonferroni	Benjamini	FDR
GOTERM_BP_FAT	GO:0030097~hemopoiesis	3	0.102041	0.99267	BRM, CDC42, CACT	1203	43	7937	0.460303	1	1	100
GOTERM_BP_FAT	GO:0048534~hemopoietic or lymphoid organ development	3	0.102041	0.999065	BRM, CDC42, CACT	1203	57	7937	0.347246	1	1	100
GOTERM_BP_FAT	GO:0002520~immune system development	3	0.102041	0.999065	BRM, CDC42, CACT	1203	57	7937	0.347246	1	1	100
Annotation Cluster 146	Enrichment Score: 0.0010952986595145146
Category	Term	Count	%	PValue	Genes	List Total	Pop Hits	Pop Total	Fold Enrichment	Bonferroni	Benjamini	FDR
GOTERM_BP_FAT	GO:0000122~negative regulation of transcription from RNA polymerase II promoter	6	0.204082	0.964622	BOWL, BRK, CAF1, AEF1, BIN1, ABO	1203	61	7937	0.648951	1	1	100
GOTERM_MF_FAT	GO:0016564~transcription repressor activity	11	0.37415	0.998641	ALIEN, ASX, CG14907, BR, CG31716, CG14906, BOWL, BRK, CG1868, AEF1, BIN1, ACHI	1510	109	7918	0.529182	1	1	100
GOTERM_BP_FAT	GO:0010629~negative regulation of gene expression	22	0.748299	0.999746	CG14907, APC2, CG14906, CG5060, CBP80, AEF1, CG17265, ALIEN, ASX, BOWL, CG31716, BRK, ARMI, AGO1, CAF1, AGO2, AGO3, CG2051, CBP20, BIN1, ABO, BEL, BRD8	1203	256	7937	0.566987	1	1	100
GOTERM_BP_FAT	GO:0045814~negative regulation of gene expression, epigenetic	5	0.170068	0.999962	ASX, AGO1, CAF1, CG2051, BIN1	1203	105	7937	0.314175	1	1	100
GOTERM_BP_FAT	GO:0006342~chromatin silencing	5	0.170068	0.999962	ASX, AGO1, CAF1, CG2051, BIN1	1203	105	7937	0.314175	1	1	100
GOTERM_BP_FAT	GO:0006357~regulation of transcription from RNA polymerase II promoter	13	0.442177	0.999964	BGB, AEF1, ARM, BEAF-32, CG10535, ATBP, ADF1, BOWL, BRK, CAF1, BIP2, BIN1, ABO	1203	192	7937	0.446717	1	1	100
GOTERM_BP_FAT	GO:0045934~negative regulation of nucleobase, nucleoside, nucleotide and nucleic acid metabolic process	16	0.544218	0.99997	CG34423, CG14907, APC2, CG14906, CG13551, AEF1, ALIEN, ASX, BOWL, CG31716, BRK, AGO1, CAF1, CG2051, BIN1, ABO, CG10336	1203	223	7937	0.473376	1	1	100
GOTERM_BP_FAT	GO:0051172~negative regulation of nitrogen compound metabolic process	16	0.544218	0.99997	CG34423, CG14907, APC2, CG14906, CG13551, AEF1, ALIEN, ASX, BOWL, CG31716, BRK, AGO1, CAF1, CG2051, BIN1, ABO, CG10336	1203	223	7937	0.473376	1	1	100
GOTERM_BP_FAT	GO:0016481~negative regulation of transcription	13	0.442177	0.999993	CG14907, APC2, CG14906, AEF1, ALIEN, ASX, BOWL, CG31716, BRK, AGO1, CAF1, CG2051, BIN1, ABO	1203	207	7937	0.414347	1	1	100
GOTERM_BP_FAT	GO:0045892~negative regulation of transcription, DNA-dependent	11	0.37415	0.999994	ALIEN, ASX, APC2, BOWL, BRK, AGO1, CAF1, AEF1, CG2051, BIN1, ABO	1203	187	7937	0.388098	1	1	100
GOTERM_BP_FAT	GO:0010605~negative regulation of macromolecule metabolic process	24	0.816327	0.999996	APC2, CG14907, CG14906, CG5060, BOWL, CAF1, AGO1, AGO2, AGO3, CG2051, CBP20, BRD8, CBP80, AEF1, CG17265, ALIEN, ASX, CG31716, ARMI, BRK, BIN1, CG10336, ABO, BEL, BRU-2	1203	317	7937	0.499508	1	1	100
GOTERM_BP_FAT	GO:0051253~negative regulation of RNA metabolic process	11	0.37415	0.999997	ALIEN, ASX, APC2, BOWL, BRK, AGO1, CAF1, AEF1, CG2051, BIN1, ABO	1203	193	7937	0.376033	1	1	100
GOTERM_BP_FAT	GO:0010558~negative regulation of macromolecule biosynthetic process	16	0.544218	0.999998	CG14907, APC2, CG14906, AEF1, ALIEN, ASX, BOWL, CG31716, BRK, ARMI, AGO1, CAF1, CG2051, BIN1, ABO, CG10336, BRU-2	1203	246	7937	0.429117	1	1	100
GOTERM_BP_FAT	GO:0009890~negative regulation of biosynthetic process	16	0.544218	0.999998	CG14907, APC2, CG14906, AEF1, ALIEN, ASX, BOWL, CG31716, BRK, ARMI, AGO1, CAF1, CG2051, BIN1, ABO, CG10336, BRU-2	1203	249	7937	0.423947	1	1	100
GOTERM_BP_FAT	GO:0031327~negative regulation of cellular biosynthetic process	16	0.544218	0.999998	CG14907, APC2, CG14906, AEF1, ALIEN, ASX, BOWL, CG31716, BRK, ARMI, AGO1, CAF1, CG2051, BIN1, ABO, CG10336, BRU-2	1203	249	7937	0.423947	1	1	100
Annotation Cluster 147	Enrichment Score: 8.27142369724447E-4
Category	Term	Count	%	PValue	Genes	List Total	Pop Hits	Pop Total	Fold Enrichment	Bonferroni	Benjamini	FDR
GOTERM_BP_FAT	GO:0042742~defense response to bacterium	5	0.170068	0.995498	18W, CASP, CG13551, BG4, BSK	1203	69	7937	0.478092	1	1	100
GOTERM_BP_FAT	GO:0009617~response to bacterium	5	0.170068	0.998898	18W, CASP, CG13551, BG4, BSK	1203	80	7937	0.412355	1	1	100
GOTERM_BP_FAT	GO:0006952~defense response	12	0.408163	0.999901	CG10535, CACT, AKAP200, 18W, CASP, CG13551, BG4, CG3829, AGO2, CACTIN, BSK, CG30467	1203	173	7937	0.457642	1	1	100
Annotation Cluster 148	Enrichment Score: 6.858493602024804E-4
Category	Term	Count	%	PValue	Genes	List Total	Pop Hits	Pop Total	Fold Enrichment	Bonferroni	Benjamini	FDR
GOTERM_BP_FAT	GO:0019730~antimicrobial humoral response	5	0.170068	0.996029	CACT, 18W, ALPHATUB84B, CG6509, BSK	1203	70	7937	0.471262	1	1	100
GOTERM_BP_FAT	GO:0006959~humoral immune response	5	0.170068	0.999256	CACT, 18W, ALPHATUB84B, CG6509, BSK	1203	83	7937	0.39745	1	1	100
GOTERM_BP_FAT	GO:0006955~immune response	10	0.340136	0.999985	CACT, AKAP200, 18W, BG4, CG32613, ALPHATUB84B, CG5641, AGO2, CG6509, BSK	1203	169	7937	0.390395	1	1	100
Annotation Cluster 149	Enrichment Score: 6.091917099849472E-4
Category	Term	Count	%	PValue	Genes	List Total	Pop Hits	Pop Total	Fold Enrichment	Bonferroni	Benjamini	FDR
GOTERM_MF_FAT	GO:0001653~peptide receptor activity	4	0.136054	0.996589	CG34411, CG3216, CCKLR-17D1, ALSTR	1510	47	7918	0.446273	1	1	100
GOTERM_MF_FAT	GO:0008528~peptide receptor activity, G-protein coupled	4	0.136054	0.996589	CG34411, CG3216, CCKLR-17D1, ALSTR	1510	47	7918	0.446273	1	1	100
GOTERM_MF_FAT	GO:0042277~peptide binding	5	0.170068	0.998795	CG34411, CG3216, CG14815, CCKLR-17D1, ALSTR	1510	62	7918	0.42288	1	1	100
GOTERM_MF_FAT	GO:0042923~neuropeptide binding	3	0.102041	0.999164	CG34411, CCKLR-17D1, ALSTR	1510	45	7918	0.349581	1	1	100
GOTERM_MF_FAT	GO:0008188~neuropeptide receptor activity	3	0.102041	0.999164	CG34411, CCKLR-17D1, ALSTR	1510	45	7918	0.349581	1	1	100
GOTERM_MF_FAT	GO:0042165~neurotransmitter binding	4	0.136054	0.999946	CG34411, CCKLR-17D1, ALSTR, CG2789	1510	70	7918	0.29964	1	1	100
GOTERM_MF_FAT	GO:0030594~neurotransmitter receptor activity	4	0.136054	0.999946	CG34411, CCKLR-17D1, ALSTR, CG2789	1510	70	7918	0.29964	1	1	100
Annotation Cluster 150	Enrichment Score: 2.9299396001254566E-4
Category	Term	Count	%	PValue	Genes	List Total	Pop Hits	Pop Total	Fold Enrichment	Bonferroni	Benjamini	FDR
GOTERM_BP_FAT	GO:0008344~adult locomotory behavior	6	0.204082	0.997418	BTV, ATPALPHA, ACTN, BEN, BETA4GALNACTA, ADAR	1203	84	7937	0.471262	1	1	100
GOTERM_BP_FAT	GO:0030534~adult behavior	7	0.238095	0.999887	BTV, ADHR, ATPALPHA, ADH, ACTN, BEN, BETA4GALNACTA, ADAR	1203	120	7937	0.384864	1	1	100
GOTERM_BP_FAT	GO:0007626~locomotory behavior	7	0.238095	1	ADF1, BTV, ATPALPHA, ACTN, BEN, BETA4GALNACTA, ADAR	1203	181	7937	0.255159	1	1	100
GOTERM_BP_FAT	GO:0007610~behavior	18	0.612245	1	AS, 14-3-3ZETA, ATPALPHA, APKC, ACTN, BTK29A, ADF1, BTV, CAMKII, ARMI, ADHR, BIN3, ASH1, ADH, BEN, BETA4GALNACTA, ADAR, 14-3-3EPSILON, CDASE	1203	429	7937	0.276825	1	1	100
Annotation Cluster 151	Enrichment Score: 2.720335790586451E-4
Category	Term	Count	%	PValue	Genes	List Total	Pop Hits	Pop Total	Fold Enrichment	Bonferroni	Benjamini	FDR
GOTERM_BP_FAT	GO:0007281~germ cell development	25	0.85034	0.994379	CAPU, CAPT, 14-3-3ZETA, BRUCE, ASP, BLW, BGCN, ACT5C, BOL, BG4, BICD, 14-3-3EPSILON, BLUE, BSG, BAI, CDC2, APKC, ALPHA-SPEC, ARK, ARM, CBX, ARMI, BTZ, BETA4GALNACTA, BEL	1203	243	7937	0.678773	1	1	100
GOTERM_BP_FAT	GO:0048610~reproductive cellular process	42	1.42857	0.999999	CAPU, ABD-B, CAPT, BIB, 14-3-3ZETA, ASP, BRUCE, BLW, BGCN, ABD-A, ACT5C, CDC42, CACT, BOL, BG4, CAF1, AGO2, 14-3-3EPSILON, BICD, BLUE, BSG, BAI, CDC2, APKC, BALL, BAF, ALPHA-SPEC, ARK, BUN, ARM, BSK, BTK29A, CBX, AB, BRN, CED-12, ARMI, BTZ, ATX2, BEL, ARP66B, BETA4GALNACTA	1203	500	7937	0.554204	1	1	100
GOTERM_BP_FAT	GO:0003006~reproductive developmental process	42	1.42857	1	CAPU, ABD-B, CAPT, APC2, BR, BIB, 14-3-3ZETA, ASP, BRUCE, BLW, BGCN, ABD-A, ACT5C, CDC42, CACT, BOL, BG4, CAF1, AGO2, 14-3-3EPSILON, BICD, BLUE, BSG, BAI, CDC2, APKC, ALPHA-SPEC, ARK, BUN, ARM, BSK, BTK29A, CBX, AB, BRN, ALPHA-CAT, CED-12, ARMI, BTZ, ATX2, BEL, BETA4GALNACTA	1203	506	7937	0.547633	1	1	100
GOTERM_BP_FAT	GO:0048477~oogenesis	44	1.4966	1	CAPU, CAPT, APC2, BR, BIB, 14-3-3ZETA, ASP, CCT1, BGCN, CDC42, CACT, CAF1, BRAT, 14-3-3EPSILON, BICD, BLUE, BAI, CDC2, APKC, BALL, BAF, ALPHA-SPEC, AXN, BUN, ARM, CATSUP, BEAF-32, BSK, ALIEN, AC, BTK29A, BRM, BOCA, AB, BRN, ALPHA-CAT, CED-12, ARMI, BTZ, ASH1, ATX2, ABO, BEL, ARP66B	1203	539	7937	0.538586	1	1	100
GOTERM_BP_FAT	GO:0007292~female gamete generation	44	1.4966	1	CAPU, CAPT, APC2, BR, BIB, 14-3-3ZETA, ASP, CCT1, BGCN, CDC42, CACT, CAF1, BRAT, 14-3-3EPSILON, BICD, BLUE, BAI, CDC2, APKC, BALL, BAF, ALPHA-SPEC, AXN, BUN, ARM, CATSUP, BEAF-32, BSK, ALIEN, AC, BTK29A, BRM, BOCA, AB, BRN, ALPHA-CAT, CED-12, ARMI, BTZ, ASH1, ATX2, ABO, BEL, ARP66B	1203	546	7937	0.531681	1	1	100
GOTERM_BP_FAT	GO:0007276~gamete generation	58	1.97279	1	14-3-3ZETA, CCT1, BGCN, CDC42, BOL, BG4, CAF1, BICD, BSG, CDC2, BALL, APKC, ARK, ARM, BEAF-32, BSK, BTK29A, AC, ALPHA-CAT, AB, ASH1, ARF51F, ATX2, CAPU, ABD-B, CAPT, APC2, BR, BIB, BRUCE, ASP, BLW, ABD-A, ACT5C, CACT, AGO2, BRAT, 14-3-3EPSILON, BLUE, BAI, BAF, ALPHA-SPEC, AXN, BUN, CATSUP, BRM, ALIEN, BOCA, CBX, BRN, CED-12, ARMI, BTZ, ACHI, ABO, ARP66B, BEL, BETA4GALNACTA	1203	715	7937	0.535196	1	1	100
GOTERM_BP_FAT	GO:0019953~sexual reproduction	58	1.97279	1	14-3-3ZETA, CCT1, BGCN, CDC42, BOL, BG4, CAF1, BICD, BSG, CDC2, BALL, APKC, ARK, ARM, BEAF-32, BSK, BTK29A, AC, ALPHA-CAT, AB, ASH1, ARF51F, ATX2, CAPU, ABD-B, CAPT, APC2, BR, BIB, BRUCE, ASP, BLW, ABD-A, ACT5C, CACT, AGO2, BRAT, 14-3-3EPSILON, BLUE, BAI, BAF, ALPHA-SPEC, AXN, BUN, CATSUP, BRM, ALIEN, BOCA, CBX, BRN, CED-12, ARMI, BTZ, ACHI, ABO, ARP66B, BEL, BETA4GALNACTA	1203	735	7937	0.520633	1	1	100
GOTERM_BP_FAT	GO:0032504~multicellular organism reproduction	60	2.04082	1	14-3-3ZETA, CCT1, BGCN, CDC42, BOL, BG4, CAF1, BICD, BSG, CDC2, BALL, APKC, ARK, ARM, BEAF-32, BSK, BTK29A, AC, ALPHA-CAT, AB, ASH1, ARF51F, ATX2, CAPU, ABD-B, CAPT, APC2, BR, BIB, BRUCE, ASP, BLW, ABD-A, ACT5C, CACT, CAMKII, AGO2, BRAT, 14-3-3EPSILON, BLUE, BAI, BAF, ALPHA-SPEC, AXN, BUN, CATSUP, BRM, ALIEN, BOCA, CBX, BRN, CED-12, BTV, ARMI, BTZ, ACHI, ABO, ARP66B, BEL, BETA4GALNACTA	1203	778	7937	0.508818	1	1	100
GOTERM_BP_FAT	GO:0048609~reproductive process in a multicellular organism	60	2.04082	1	14-3-3ZETA, CCT1, BGCN, CDC42, BOL, BG4, CAF1, BICD, BSG, CDC2, BALL, APKC, ARK, ARM, BEAF-32, BSK, BTK29A, AC, ALPHA-CAT, AB, ASH1, ARF51F, ATX2, CAPU, ABD-B, CAPT, APC2, BR, BIB, BRUCE, ASP, BLW, ABD-A, ACT5C, CACT, CAMKII, AGO2, BRAT, 14-3-3EPSILON, BLUE, BAI, BAF, ALPHA-SPEC, AXN, BUN, CATSUP, BRM, ALIEN, BOCA, CBX, BRN, CED-12, BTV, ARMI, BTZ, ACHI, ABO, ARP66B, BEL, BETA4GALNACTA	1203	778	7937	0.508818	1	1	100
Annotation Cluster 152	Enrichment Score: 2.590484888156113E-4
Category	Term	Count	%	PValue	Genes	List Total	Pop Hits	Pop Total	Fold Enrichment	Bonferroni	Benjamini	FDR
GOTERM_BP_FAT	GO:0060541~respiratory system development	12	0.408163	0.999167	AWD, AKT1, CG3585, BTK29A, BLIMP-1, ABD-B, AFT, ATPALPHA, BARR, CDK4, ARM, CDSA	1203	153	7937	0.517465	1	1	100
GOTERM_BP_FAT	GO:0007424~open tracheal system development	12	0.408163	0.999167	AWD, AKT1, CG3585, BTK29A, BLIMP-1, ABD-B, AFT, ATPALPHA, BARR, CDK4, ARM, CDSA	1203	153	7937	0.517465	1	1	100
GOTERM_BP_FAT	GO:0035239~tube morphogenesis	4	0.136054	0.999877	AFT, BARR, ARM, CDSA	1203	84	7937	0.314175	1	1	100
Annotation Cluster 153	Enrichment Score: 2.3589078198997513E-4
Category	Term	Count	%	PValue	Genes	List Total	Pop Hits	Pop Total	Fold Enrichment	Bonferroni	Benjamini	FDR
GOTERM_BP_FAT	GO:0007298~border follicle cell migration	4	0.136054	0.998457	AB, BRN, CED-12, BSK	1203	66	7937	0.399859	1	1	100
GOTERM_BP_FAT	GO:0007297~ovarian follicle cell migration	5	0.170068	0.998571	AB, BRN, CED-12, BUN, BSK	1203	78	7937	0.422928	1	1	100
GOTERM_BP_FAT	GO:0051674~localization of cell	15	0.510204	0.999816	CG10083, ABD-B, APC2, BUN, ARM, ABD-A, BSK, AWD, AKT1, CDC42, ALPHA-CAT, BRN, AB, CED-12, AFT	1203	196	7937	0.504924	1	1	100
GOTERM_BP_FAT	GO:0016477~cell migration	12	0.408163	0.999921	AWD, AKT1, CDC42, CG10083, ABD-B, AB, BRN, CED-12, AFT, BUN, ABD-A, BSK	1203	175	7937	0.452412	1	1	100
GOTERM_BP_FAT	GO:0048870~cell motility	12	0.408163	0.999979	AWD, AKT1, CDC42, CG10083, ABD-B, AB, BRN, CED-12, AFT, BUN, ABD-A, BSK	1203	187	7937	0.42338	1	1	100
GOTERM_BP_FAT	GO:0006928~cell motion	21	0.714286	0.999999	ABD-B, BIF, CG10083, APC2, ALPHA-SPEC, BABO, BUN, CDK5, ABD-A, CG33960, BSK, BETA-SPEC, BUR, AKT1, AWD, CDC42, BRN, AB, CED-12, AFT, CDGAPR	1203	305	7937	0.454266	1	1	100
Annotation Cluster 154	Enrichment Score: 6.586913459818397E-5
Category	Term	Count	%	PValue	Genes	List Total	Pop Hits	Pop Total	Fold Enrichment	Bonferroni	Benjamini	FDR
GOTERM_BP_FAT	GO:0007619~courtship behavior	3	0.102041	0.999487	BTK29A, BTV, CAMKII	1203	61	7937	0.324476	1	1	100
GOTERM_BP_FAT	GO:0007617~mating behavior	3	0.102041	0.999917	BTK29A, BTV, CAMKII	1203	73	7937	0.271137	1	1	100
GOTERM_BP_FAT	GO:0019098~reproductive behavior	4	0.136054	0.99992	BTK29A, BTV, CAMKII, ASH1	1203	87	7937	0.303341	1	1	100
GOTERM_BP_FAT	GO:0051705~behavioral interaction between organisms	3	0.102041	0.999929	BTK29A, BTV, CAMKII	1203	74	7937	0.267473	1	1	100
GOTERM_BP_FAT	GO:0007618~mating	3	0.102041	0.999989	BTK29A, BTV, CAMKII	1203	86	7937	0.230151	1	1	100
Annotation Cluster 155	Enrichment Score: 6.364808097910284E-5
Category	Term	Count	%	PValue	Genes	List Total	Pop Hits	Pop Total	Fold Enrichment	Bonferroni	Benjamini	FDR
GOTERM_MF_FAT	GO:0004175~endopeptidase activity	63	2.14286	0.999437	CG17370, CG14231, CG6194, CG30414, CG4725, CG4169, CG6512, CG31918, CG17331, CG4420, CG4998, ATG4, CG5390, CG14642, CG11771, CG3731, CG4914, 26-29-P, CG2658, CG5715, CG3775, CG5355, CG31217, CG5527, CG11836, CG1299, CG5045, CG4096, CG6696, CG10882, CATHD, CG30187, CG2025, CG33128, CG5367, CG3499, CALPC, CALPB, CG3355, CG31728, CG6041, CG11459, CG4406, CG14528, CG34350, CG40160, CG13430, CG4933, C…	1510	457	7918	0.722874	1	1	100
GOTERM_MF_FAT	GO:0017171~serine hydrolase activity	34	1.15646	0.999986	CG11110, CG2145, CG30414, CG10882, CG3744, CG2493, CG30187, CG4998, CG11034, CG3355, CG31728, CG6041, CG5390, CG14642, CG13430, CG40160, CG34350, CG4914, CG2200, CG34409, CG5355, CG17684, CG32808, CG31217, CG4538, CG5377, CG11836, CG10469, CG1299, CG6361, CG3303, CG4572, CG3700, CG5045	1510	310	7918	0.575116	1	1	100
GOTERM_MF_FAT	GO:0008236~serine-type peptidase activity	33	1.12245	0.999992	CG11110, CG2145, CG30414, CG10882, CG3744, CG2493, CG30187, CG4998, CG11034, CG3355, CG31728, CG6041, CG5390, CG14642, CG13430, CG40160, CG34350, CG4914, CG2200, CG34409, CG5355, CG17684, CG32808, CG31217, CG4538, CG11836, CG10469, CG1299, CG6361, CG3303, CG4572, CG3700, CG5045	1510	308	7918	0.561826	1	1	100
GOTERM_MF_FAT	GO:0004252~serine-type endopeptidase activity	25	0.85034	1	CG30414, CG10882, CG30187, CG4998, CG3355, CG6041, CG31728, CG5390, CG14642, CG13430, CG40160, CG34350, CG4914, CG34409, CG5355, CG31217, CG32808, CG4538, CG11836, CG10469, CG6361, CG1299, CG3303, CG3700, CG5045	1510	280	7918	0.468188	1	1	100
Annotation Cluster 156	Enrichment Score: 2.701035357960939E-5
Category	Term	Count	%	PValue	Genes	List Total	Pop Hits	Pop Total	Fold Enrichment	Bonferroni	Benjamini	FDR
GOTERM_BP_FAT	GO:0007391~dorsal closure	5	0.170068	0.999851	BTK29A, CDC42, ARM, BSK, CBT	1203	95	7937	0.347246	1	1	100
GOTERM_BP_FAT	GO:0001700~embryonic development via the syncytial blastoderm	15	0.510204	0.999972	BLP, A6, APC2, ATPALPHA, BX42, ARM, BSK, BTK29A, CDI, CDC42, AGO2, BARR, ASH1, ARP66B, CBT	1203	214	7937	0.462454	1	1	100
GOTERM_BP_FAT	GO:0009792~embryonic development ending in birth or egg hatching	15	0.510204	0.999991	BLP, A6, APC2, ATPALPHA, BX42, ARM, BSK, BTK29A, CDI, CDC42, AGO2, BARR, ASH1, ARP66B, CBT	1203	224	7937	0.441808	1	1	100
Annotation Cluster 157	Enrichment Score: 1.1581705314733577E-6
Category	Term	Count	%	PValue	Genes	List Total	Pop Hits	Pop Total	Fold Enrichment	Bonferroni	Benjamini	FDR
GOTERM_BP_FAT	GO:0051252~regulation of RNA metabolic process	68	2.31293	0.99999	CG6197, BGB, ADF1, CG10418, CAF1, BKA, CG15011, BAP60, CG2051, CG14641, ACF1, BAP55, CG10445, CG2926, CG31367, CG16941, CG13624, ARM, BEAF-32, CG11266, C15, AC, CG32343, AB, CG17454, CG18619, ASH1, ASH2, BIN1, CG4119, CG6227, ABD-B, APC2, BR, CG5728, B52, CG1646, CG34415, ATF-2, ABD-A, CG10535, ATBP, BAP170, BI, CG6272, BOWL, CG11360, AGO1, BL, CG4042, CG5641, AEF1, BUN, ASF1, ATF6, BRM, ALIEN, A…	1203	678	7937	0.661713	1	1	100
GOTERM_BP_FAT	GO:0045449~regulation of transcription	76	2.58503	1	CG14907, BGB, CG14906, CAG, CG42259, AOS1, CG5343, ADA2B, ART4, ADF1, CAF1, BKA, CG15011, BAP60, CG2051, ACF1, BAP55, ARP8, ARP5, CDK8, CG31367, CG1965, CG2199, CG13624, ARM, BEAF-32, C15, AC, CG32343, AB, CG18619, BIN3, ASH1, CG3328, ASH2, BIN1, ABD-B, APC2, BR, CG34415, ATF-2, ABD-A, CG11033, CG10535, ATBP, BAP170, BI, CG6272, BOWL, AGO1, CG17446, CG12744, CAMTA, CG11710, CG4042, CG5641, AEF1, …	1203	799	7937	0.627563	1	1	100
GOTERM_BP_FAT	GO:0006355~regulation of transcription, DNA-dependent	50	1.70068	1	BGB, ADF1, CAF1, CG15011, BKA, BAP60, CG2051, ACF1, BAP55, CG31367, ARM, CG13624, BEAF-32, C15, AC, CG32343, AB, CG18619, ASH1, BIN1, ASH2, ABD-B, APC2, BR, ATF-2, CG34415, ABD-A, CG10535, BAP170, ATBP, BI, CG6272, BOWL, AGO1, CG5641, CG4042, AEF1, BUN, BRM, ALIEN, ATF6, ASX, CG33785, CF2, BRK, CG13188, BIP2, BRF, ACHI, ABO	1203	612	7937	0.539026	1	1	100
GOTERM_MF_FAT	GO:0030528~transcription regulator activity	72	2.44898	1	CG14907, BGB, CG14906, CG5591, CG5343, CG16903, CAZ, CG3909, ADF1, CG15011, BKA, BAP60, BAP55, CG4557, ARP8, CG10445, CG11970, ARP5, CDK8, CDK9, BON, CG31367, CG1965, CDK7, CG13624, ARM, C15, AC, CG32343, AB, CG1868, CG18619, CG3328, BIN1, BIC, ABD-B, BR, ATF-2, ABD-A, ATBP, BAP170, BI, CG3711, CG6272, CG5317, BOWL, CG3815, ALH, CAMTA, CG11710, ARC42, CG33097, CG4042, CG5641, AEF1, BUN, BIGMAX, A…	1510	682	7918	0.553588	1	1	100
Annotation Cluster 158	Enrichment Score: 8.53953155860999E-7
Category	Term	Count	%	PValue	Genes	List Total	Pop Hits	Pop Total	Fold Enrichment	Bonferroni	Benjamini	FDR
GOTERM_BP_FAT	GO:0005976~polysaccharide metabolic process	8	0.272109	0.999993	CG3194, CG34220, BETA4GALT7, CG13676, CG12913, CG15313, BSK, BOTV	1203	153	7937	0.344976	1	1	100
GOTERM_BP_FAT	GO:0006022~aminoglycan metabolic process	7	0.238095	0.999993	CG3194, CG34220, BETA4GALT7, CG13676, CG12913, CG15313, BOTV	1203	142	7937	0.325237	1	1	100
GOTERM_BP_FAT	GO:0006030~chitin metabolic process	3	0.102041	1	CG34220, CG13676, CG15313	1203	114	7937	0.173623	1	1	100
GOTERM_MF_FAT	GO:0030246~carbohydrate binding	12	0.408163	1	CG32445, BIF, CG34220, CG32226, CG11619, CG32613, ALPHA-MAN-II, CG2818, CG13676, CG10467, CG15313, CG1371	1510	191	7918	0.329448	1	1	100
GOTERM_MF_FAT	GO:0008061~chitin binding	3	0.102041	1	CG34220, CG13676, CG15313	1510	100	7918	0.157311	1	1	100
GOTERM_MF_FAT	GO:0001871~pattern binding	4	0.136054	1	CG34220, CG32613, CG13676, CG15313	1510	124	7918	0.169152	1	1	100
GOTERM_MF_FAT	GO:0030247~polysaccharide binding	4	0.136054	1	CG34220, CG32613, CG13676, CG15313	1510	124	7918	0.169152	1	1	100
Annotation Cluster 159	Enrichment Score: 6.5528765355967E-7
Category	Term	Count	%	PValue	Genes	List Total	Pop Hits	Pop Total	Fold Enrichment	Bonferroni	Benjamini	FDR
GOTERM_BP_FAT	GO:0046530~photoreceptor cell differentiation	6	0.204082	0.999991	BR, 14-3-3ZETA, BUN, ARM, BEN, AMPH	1203	128	7937	0.309266	1	1	100
GOTERM_BP_FAT	GO:0001751~compound eye photoreceptor cell differentiation	4	0.136054	0.999998	BR, 14-3-3ZETA, BUN, AMPH	1203	111	7937	0.237754	1	1	100
GOTERM_BP_FAT	GO:0001754~eye photoreceptor cell differentiation	4	0.136054	0.999999	BR, 14-3-3ZETA, BUN, AMPH	1203	116	7937	0.227506	1	1	100
GOTERM_BP_FAT	GO:0001745~compound eye morphogenesis	10	0.340136	1	BI, ALPH, BR, ARR, 14-3-3ZETA, CCT1, BUN, ARM, AUX, AMPH	1203	250	7937	0.263907	1	1	100
GOTERM_BP_FAT	GO:0048592~eye morphogenesis	11	0.37415	1	BI, ALPH, BR, ARR, 14-3-3ZETA, CCT1, BUN, ARM, AUX, CBT, AMPH	1203	269	7937	0.269793	1	1	100
GOTERM_BP_FAT	GO:0048749~compound eye development	12	0.408163	1	CAPT, BI, ALPH, BR, ARR, 14-3-3ZETA, CCT1, BUN, ATX2, ARM, AUX, AMPH	1203	308	7937	0.257052	1	1	100
GOTERM_BP_FAT	GO:0007423~sensory organ development	20	0.680272	1	CAPT, ALPH, BR, 14-3-3ZETA, APKC, CCT1, ARK, BUN, ARM, AMPH, AC, BORR, BI, AB, ASX, ARR, ABI, AUX, ATX2, CBT	1203	410	7937	0.321838	1	1	100
GOTERM_BP_FAT	GO:0001654~eye development	13	0.442177	1	CAPT, ALPH, BR, 14-3-3ZETA, CCT1, BUN, ARM, AMPH, BI, ARR, ATX2, AUX, CBT	1203	332	7937	0.258343	1	1	100

## Sheet: No change 2
Annotation Cluster 1	Enrichment Score: 32.247808658857
Category	Term	Count	%	PValue	Genes	List Total	Pop Hits	Pop Total	Fold Enrichment	Bonferroni	Benjamini	FDR
GOTERM_BP_FAT	GO:0000278~mitotic cell cycle	229	7.76271	1.38253e-45	RPL18, PDP1, PVR, RPL17, TLK, RPL19, RPL14, RPL13, NOD, NOI, MOV34, ROD, SU(VAR)2-HP2, PPD3, RPL11, RPL12, ROK, PH-D, PROS26.4, KLP3A, CHB, PP1-87B, SPAS, SAK, RIC8A, SSP3, SSP2, T-CP1, RPS16, PH-P, SSP4, RPS15, KMN1, RPS13, PELO, RPS11, INVADOLYSIN, DLT, NEK2, SBF, RAB5, MYT1, RPS15AB, RPS15AA, NUDE, SAN, CKS85A, LAMC, POLO, PIM, HD, DMT, SPD-2, EIF3-S10, NUF2, RPS9, NDC80, DMN, RPS6, RCA1, MIP1…	2266	358	7937	2.24052	4.42685e-42	4.42685e-42	2.50754e-42
GOTERM_BP_FAT	GO:0007010~cytoskeleton organization	268	9.08475	2.75889e-41	RPL18, PVR, RPL17, LILLI, CHIC, RPL19, RPL14, RPL13, NOD, ED, OVO, MOE, NOI, RHOGEF2, MOV34, ILK, DG, RPL11, RPL12, ROK, PKA-R1, TANKYRASE, PROS26.4, KLP3A, CHB, PP1-87B, SPN-F, GEK, GEL, SPN-D, SPAS, SAK, RIC8A, SSP3, SSP2, T-CP1, RPS16, RPS15, SSP4, SCED, FLII, RPS13, PELO, RPS11, INVADOLYSIN, RAB11, SHOT, F, FS(2)KET, KEL, FAK56D, RAB6, N, RPS15AB, PKA-C1, RPS15AA, NUDE, RAC2, RAC1, POLO, EMB,…	2266	465	7937	2.01873	8.83395e-38	4.41698e-38	5.0039e-38
GOTERM_BP_FAT	GO:0007049~cell cycle	320	10.8475	5.13502e-37	RPL18, PVR, PDP1, CHIC, LILLI, RPL17, TLK, RPL19, RPL14, RPL13, NOD, NOI, MOV34, DM, ROD, SU(VAR)2-HP2, PPD3, RPL11, RPL12, ROK, E(R), PROS26.4, PH-D, PP1-87B, KLP3A, CHB, SPN-B, SPN-A, SPN-D, SAK, SPAS, RIC8A, SSP3, SSP2, T-CP1, RPS16, RPS15, PH-P, SSP4, SCED, RPS13, KMN1, PELO, RPS11, INVADOLYSIN, SHOT, SXL, DLT, NEK2, SBF, RAB5, N, MYT1, RPS15AB, RPS15AA, NUDE, SAN, CKS85A, HIS4R, LAMC, POLO, …	2266	616	7937	1.81956	1.64423e-33	5.48077e-34	9.31358e-34
GOTERM_BP_FAT	GO:0007051~spindle organization	154	5.22034	1.24934e-35	RPL18, PVR, RPL17, RPL19, RPL14, RPL13, NOD, NOI, CNN, MOV34, SAS-4, SAS-6, SPX, EIF-2ALPHA, SNRNP2, RPN1, ORC5, RPL11, RPL12, ROK, ORC2, L(1)DD4, PROS26.4, CHB, KLP3A, PP1-87B, SAK, SSP3, SSP2, TACC, T-CP1, RPS16, SSP4, RPS15, RPS13, SLU7, PELO, RPS11, INVADOLYSIN, MUS209, CG7033, CKS30A, RPS15AB, RPS15AA, NUDE, SPC25, RPL7, RPL6, RPL9, RPL8, RPL3, KLP61F, POLO, RPL7A, HEL25E, MUD, SPC105R, DMT,…	2266	225	7937	2.39737	4.00039e-32	1.0001e-32	2.26598e-32
GOTERM_BP_FAT	GO:0007052~mitotic spindle organization	139	4.71186	1.48314e-35	RPL18, PVR, RPL17, RPL19, RPL14, RPL13, NOD, NOI, CNN, MOV34, SAS-4, SAS-6, SPX, EIF-2ALPHA, SNRNP2, RPN1, ORC5, RPL11, RPL12, ROK, ORC2, L(1)DD4, PROS26.4, CHB, PP1-87B, KLP3A, SAK, SSP3, SSP2, TACC, T-CP1, RPS16, SSP4, RPS15, RPS13, SLU7, RPS11, INVADOLYSIN, MUS209, CG7033, RPS15AB, RPS15AA, NUDE, SPC25, RPL7, RPL6, RPL9, RPL8, RPL3, POLO, KLP61F, RPL7A, HEL25E, SPC105R, DMT, SPD-2, EIF3-S10, N…	2266	194	7937	2.50963	4.74901e-32	9.49802e-33	2.69003e-32
GOTERM_BP_FAT	GO:0000226~microtubule cytoskeleton organization	187	6.33898	1.98029e-35	RPL18, PVR, RPL17, RPL19, RPL14, RPL13, NOD, NOI, CNN, MOV34, SAS-4, SAS-6, SPX, EIF-2ALPHA, RPN1, SNRNP2, ORC5, RPL11, RPL12, PKA-R1, ROK, ORC2, L(1)DD4, L(2)GL, PROS26.4, CHB, KLP3A, PP1-87B, CP309, FMR1, SPN-F, SQD, SPN-D, SPAS, SAK, RIC8A, SSP3, TACC, SSP2, T-CP1, RPS16, SSP4, RPS15, RPS13, SLU7, PELO, RPS11, INVADOLYSIN, SHOT, RAB11, MUS209, CG7033, CKS30A, RAB6, MAGO, RPS15AB, PKA-C1, RPS15…	2266	298	7937	2.19797	6.34088e-32	1.05681e-32	3.59172e-32
GOTERM_BP_FAT	GO:0022402~cell cycle process	277	9.38983	1.83241e-29	RPL18, PVR, PDP1, CHIC, LILLI, RPL17, RPL19, RPL14, RPL13, NOD, NOI, MOV34, DM, ROD, SU(VAR)2-HP2, RPL11, RPL12, ROK, PROS26.4, KLP3A, CHB, PP1-87B, SPN-B, SPN-A, SPN-D, SPAS, SAK, RIC8A, SSP3, SSP2, T-CP1, RPS16, RPS15, SSP4, SCED, KMN1, RPS13, PELO, RPS11, INVADOLYSIN, SHOT, SXL, DLT, NEK2, RAB5, MYT1, RPS15AB, RPS15AA, NUDE, SAN, CKS85A, HIS4R, LAMC, POLO, EMB, PIM, SKPA, SCAR, SUUR, HD, CUP, …	2266	547	7937	1.77374	5.86737e-26	7.33422e-27	3.32351e-26
GOTERM_BP_FAT	GO:0007017~microtubule-based process	221	7.49153	5.21086e-29	RPL18, PVR, RPL17, STAU, RPL19, RPL14, RPL13, NOD, SHI, NOI, MOV34, RPL11, RPL12, ROK, PKA-R1, STAI, PROS26.4, CHB, KLP3A, PP1-87B, SYD, SPN-F, SPN-D, SPAS, SAK, RIC8A, SSP3, SSP2, T-CP1, RPS16, SSP4, RPS15, RPS13, PELO, RPS11, INVADOLYSIN, SHOT, RAB11, KAT80, RAB6, RPS15AB, PKA-C1, RPS15AA, NUDE, RAC2, RAC1, POLO, DLC90F, EMB, SKPA, DMT, EIF3-S10, SPD-2, NUF2, RPS9, NDC80, DMN, RPS6, OSM-6, KIF3…	2266	406	7937	1.90661	1.66852e-25	1.85391e-26	9.45114e-26
GOTERM_BP_FAT	GO:0051231~spindle elongation	70	2.37288	6.82415e-28	RPL18, PVR, EB1, RPL17, RPL19, RPL14, RPL13, CG8636, RPS4, MOV34, RPS3A, EIF-2ALPHA, RPN1, RPL11, RPL12, ROK, PROSBETA5, PROS26.4, EIF-4E, PP1-87B, KLP3A, CHB, EIF-4A, SSP3, STA, SSP2, RPS16, NCD, RPS15, SSP4, RPS13, RPS11, RPL10AB, RPL27A, RPL35, NNP-1, RPL39, RPS15AB, RPS15AA, EIF-2BETA, RPL30, RPS5A, RPL32, RPL7, RPL31, RPL6, RPL9, RPL8, RPL3, RPL7A, EIF-1A, EIF3-S10, RPL26, RPS9, RPL27, MSPS,…	2266	79	7937	3.10361	2.18509e-24	2.18509e-25	1.23772e-24
GOTERM_BP_FAT	GO:0022403~cell cycle phase	253	8.57627	1.78921e-27	RPL18, PDP1, PVR, RPL17, RPL19, RPL14, RPL13, NOD, NOI, MOV34, ROD, SU(VAR)2-HP2, RPL11, RPL12, ROK, PROS26.4, KLP3A, CHB, PP1-87B, SPN-B, SPN-A, SPN-D, SPAS, SAK, SSP3, SSP2, T-CP1, RPS16, SSP4, RPS15, KMN1, RPS13, PELO, RPS11, INVADOLYSIN, SXL, DLT, NEK2, RAB5, MYT1, RPS15AB, RPS15AA, NUDE, SAN, CKS85A, HIS4R, POLO, PIM, HD, CUP, SCA, DMT, SPD-2, EIF3-S10, SCE, NUF2, RPS9, NDC80, DMN, RPS6, RCA…	2266	496	7937	1.78663	5.72905e-24	5.20823e-25	3.24516e-24
GOTERM_BP_FAT	GO:0000022~mitotic spindle elongation	69	2.33898	2.1321e-27	RPL18, EB1, PVR, RPL17, RPL19, RPL14, RPL13, CG8636, RPS4, MOV34, RPS3A, EIF-2ALPHA, RPN1, RPL11, RPL12, ROK, PROSBETA5, PROS26.4, EIF-4E, PP1-87B, CHB, EIF-4A, SSP3, STA, SSP2, RPS16, NCD, RPS15, SSP4, RPS13, RPS11, RPL10AB, RPL27A, RPL35, NNP-1, RPL39, RPS15AB, RPS15AA, EIF-2BETA, RPL30, RPS5A, RPL32, RPL7, RPL31, RPL6, RPL9, RPL8, RPL3, RPL7A, EIF-1A, EIF3-S10, RPL26, RPS9, RPL27, MSPS, RPL24,…	2266	78	7937	3.0985	6.82699e-24	5.68915e-25	3.86708e-24
GOTERM_BP_FAT	GO:0000279~M phase	238	8.0678	5.94712e-24	RPL18, PDP1, PVR, RPL17, RPL19, RPL14, RPL13, NOD, NOI, MOV34, ROD, SU(VAR)2-HP2, RPL11, RPL12, ROK, PROS26.4, KLP3A, CHB, PP1-87B, SPN-B, SPN-A, SPN-D, SPAS, SAK, SSP3, SSP2, T-CP1, RPS16, SSP4, RPS15, KMN1, RPS13, PELO, RPS11, INVADOLYSIN, SXL, NEK2, RAB5, MYT1, RPS15AB, RPS15AA, NUDE, SAN, CKS85A, HIS4R, POLO, PIM, CUP, SCA, DMT, SPD-2, EIF3-S10, SCE, NUF2, RPS9, NDC80, DMN, RPS6, MIP130, LKB1…	2266	478	7937	1.744	1.90427e-20	1.12016e-21	1.07865e-20
Annotation Cluster 2	Enrichment Score: 17.979856320703156
Category	Term	Count	%	PValue	Genes	List Total	Pop Hits	Pop Total	Fold Enrichment	Bonferroni	Benjamini	FDR
GOTERM_BP_FAT	GO:0006259~DNA metabolic process	137	4.64407	3.12086e-25	MMS19, RAD51D, PDP1, RAD51C, CG9272, PITA, NOD, RFC38, RAD9, MEI-41, DNAPOL-ALPHA50, MIP40, CHKOV1, DM, HIS2AV, MTSSB, RAD23, SNM1, RPLP0, ORC4, ORC5, PMS2, ORC1, ORC2, MRG15, CUTLET, RRP1, KLP3A, PHR6-4, SPN-B, CG8142, SPN-A, LIG3, SPN-D, TAM, LIG4, MEI-9, MRE11, RAD1, RFC3, MUS210, GEN, MUS312, GNF1, RAD17, SXL, DUP, RECQ5, MUS209, RECQ4, IRBP, POLE2, FLFL, MUS205, PIM, SPF45, SKPA, MUS201, THD…	2266	221	7937	2.17132	9.99299e-22	7.13785e-23	5.66042e-22
GOTERM_BP_FAT	GO:0033554~cellular response to stress	108	3.66102	1.58052e-19	MMS19, RAD51D, RAD51C, PRX6005, CG9272, SU(TPL), NOD, LOK, CNO, RAD9, MEI-41, HIS2AV, RAD23, SNM1, RPLP0, PMS2, MRG15, RRP1, PHR6-4, SPN-B, SPN-A, LIG3, JRA, SEC61ALPHA, LIG4, MEI-9, MRE11, HERP, RAD1, MUS210, GEN, MUS312, RAD17, RECQ5, MUS209, PAK, RECQ4, SHARK, IRBP, PYD, RAC2, FLFL, RAC1, DUOX, MUS205, SPF45, MUS201, THD1, RHO1, CG9203, SPEL1, HUS1-LIKE, CKIALPHA, MU2, PHR, MEI-W68, MKK4, MTL,…	2266	176	7937	2.14935	5.06084e-16	2.30038e-17	2.86666e-16
GOTERM_BP_FAT	GO:0006974~response to DNA damage stimulus	74	2.50847	4.71048e-15	MMS19, RAD51D, DEBCL, RAD51C, DNAPOL-IOTA, CG9272, NOD, LOK, MLH1, RAD9, MEI-41, RPS3, HIS2AV, RAD23, SNM1, TEFU, RPLP0, KU80, OKR, PMS2, MRG15, RRP1, REV1, PHR6-4, SPN-B, SPN-A, LIG3, LIG4, DRE4, MEI-9, RAD50, MRE11, GRP, RAD1, PR-SET7, GEN, MUS210, MUS312, CG6812, DNAPOL-ETA, RAD17, RECQ5, SSL1, ECO, MUS209, RECQ4, MNN1, IRBP, FLFL, HAY, MUS205, SPF45, MUS201, ERCC1, DNAPOL-ALPHA180, FEN1, MSH6…	2266	115	7937	2.25388	1.49307e-11	3.31846e-13	8.4599e-12
GOTERM_BP_FAT	GO:0006281~DNA repair	68	2.30508	5.18124e-15	MMS19, RAD51D, RAD51C, DNAPOL-IOTA, CG9272, NOD, MLH1, RAD9, MEI-41, RPS3, HIS2AV, RAD23, SNM1, TEFU, RPLP0, KU80, OKR, PMS2, MRG15, RRP1, REV1, PHR6-4, SPN-B, SPN-A, LIG3, LIG4, DRE4, MEI-9, RAD50, MRE11, RAD1, GEN, MUS210, MUS312, CG6812, DNAPOL-ETA, RAD17, SSL1, ECO, MUS209, RECQ4, MNN1, IRBP, HAY, FLFL, MUS205, SPF45, MUS201, ERCC1, DNAPOL-ALPHA180, FEN1, MSH6, SSRP, THD1, TFB4, CG9203, MUS30…	2266	102	7937	2.3351	1.67082e-11	3.63265e-13	9.4591e-12
Annotation Cluster 3	Enrichment Score: 17.41127914824021
Category	Term	Count	%	PValue	Genes	List Total	Pop Hits	Pop Total	Fold Enrichment	Bonferroni	Benjamini	FDR
GOTERM_MF_FAT	GO:0003735~structural constituent of ribosome	139	4.71186	2.70873e-43	RPL18, MRPL40, RPL17, MRPS35, MRPL42, MRPS33, RPL19, MRPL41, RPL14, RPL13, RPL15, RPLP2, MRPS31, MRPS30, RPLP0, RPLP1, MRPL36, MRPL38, RPL11, MRPL39, RPL12, MRPL32, MRPL33, RPS27A, CG6764, MRPL34, MRPL35, RPL35A, MRPL52, MRPL51, MRPL50, MRPS18C, MRPS18B, RPS16, RPS17, MRPS18A, RPS15, MRPL49, RPS12, RPS13, MRPL48, RPS11, MRPL45, MRPL43, MRPL44, MRPS17, MRPS16, MRPS14, MRPS11, MRPS10, RPS15AB, RPS1…	2237	178	7918	2.76404	3.73804e-40	3.73804e-40	4.45525e-40
GOTERM_MF_FAT	GO:0005198~structural molecule activity	174	5.89831	2.47961e-06	RPL18, MRPL40, MRPS35, RPL17, MRPL42, MRPS33, RPL19, MRPL41, RPL14, RPL13, RPL15, RPLP2, MRPS31, MRPS30, NUP44A, RPLP0, RPLP1, MRPL36, MRPL38, RPL11, DG, RPL12, MRPL39, MRPL32, MRPL33, RPS27A, CG6764, MRPL34, MRPL35, TANKYRASE, CHC, RPL35A, MRPL52, MRPL51, MRPL50, SYD, OBST-A, MRPS18C, MRPS18B, RPS16, MRPS18A, RPS17, RPS15, MRPL49, RPS12, RPS13, RPS11, MRPL48, MRPL45, MRPL43, MRPL44, MRPS17, MRPS…	2237	456	7918	1.35062	0.00341601	0.000100638	0.00407832
GOTERM_BP_FAT	GO:0006412~translation	188	6.37288	8.6899e-05	RPL18, MRPL40, EIF6, MRPS35, RPL17, MRPL42, MRPS33, RPL19, MRPL41, RPL14, RPL13, RPL15, EIF5, EIF5B, RPLP2, EIF2B-GAMMA, MRPS31, MRPS30, RPLP0, EIF-2ALPHA, RPLP1, MRPL36, MRPL38, RPL11, RPL12, TFIIB, MRPL39, MRPL32, MRPL33, RPS27A, MRPL34, CG6764, INT6, MRPL35, RPL35A, MRPL52, MRPL51, CG8097, EIF2B-DELTA, GATA, MRPS18C, EIF-3P40, EIF2B-ALPHA, MRPS18B, RPS16, MRPS18A, RPS17, HBS1, RPS15, MRPL49, R…	2266	520	7937	1.26634	0.242902	0.0010339	0.157495
Annotation Cluster 4	Enrichment Score: 17.047590411611793
Category	Term	Count	%	PValue	Genes	List Total	Pop Hits	Pop Total	Fold Enrichment	Bonferroni	Benjamini	FDR
GOTERM_BP_FAT	GO:0051276~chromosome organization	161	5.45763	4.42298e-24	CHIC, TLK, HIRA, DF31, HP1B, INO80, HP1C, MOF, MEI-41, CP190, HIS2AV, ROD, SU(VAR)2-HP2, NOT, HMGD, MOR, ORC5, JIL-1, RPS27A, ORC2, E(Z), MRG15, JUMU, CHB, PP1-87B, SPN-B, SPN-A, FMR1, SPN-D, LIG4, SPN-E, RPD3, CG8289, MRE11, E(BX), GAS41, MUS312, MSL-3, SU(HW), KMN1, INVADOLYSIN, KEL, SU(VAR)2-10, LOLAL, RAB5, CHRO, IRBP, NUDE, SPC25, SAN, HIS4R, NURF-38, TEF, PIM, SKPA, MUS201, EGG, LID, PONT, …	2266	282	7937	1.99974	1.41624e-20	8.85149e-22	8.02213e-21
GOTERM_BP_FAT	GO:0016568~chromatin modification	72	2.44068	1.25518e-14	MOD(MDG4), TARA, CG7950, TLK, G9A, HIRA, INO80, ISWI, ESC, MOF, CP190, PARP, SAS10, SGF11, TEFU, SU(VAR)2-HP2, MI-2, NOT, RTF1, SUV4-20, MOR, JIL-1, E(Z), MRG15, REPT, FMR1, DALAO, RPD3, E(BX), PR-SET7, IAL, DOM, GAS41, DP1, PSC, MSL-3, SU(HW), JING, PSR, SNR1, INVADOLYSIN, MARCAL1, SPT4, LOLAL, TNA, NURF-38, CHD1, MUS201, EGG, LID, PONT, SUUR, TAF1, SU(VAR)3-9, SU(VAR)3-3, SU(Z)12, E(Y)2, SU(VAR…	2266	112	7937	2.2517	4.01708e-11	8.36886e-13	2.27596e-11
GOTERM_BP_FAT	GO:0006325~chromatin organization	97	3.28814	1.2966e-14	TLK, DF31, HIRA, INO80, HP1B, HP1C, MOF, CP190, HIS2AV, SU(VAR)2-HP2, NOT, HMGD, MOR, JIL-1, RPS27A, E(Z), JUMU, MRG15, FMR1, RPD3, E(BX), CG8289, GAS41, MSL-3, SU(HW), INVADOLYSIN, LOLAL, RAB5, CHRO, HIS4R, NURF-38, EGG, MUS201, LID, PONT, SUUR, TAF1, SCF, E(Y)2, SET2, SCM, HDAC4, HDAC3, PZG, SIR2, NAP1, PHO, MES-4, NIPPED-A, HDAC6, PC, CG7950, MOD(MDG4), TARA, G9A, ISWI, ESC, PARP, SAS10, HIS3.…	2266	170	7937	1.99857	4.15927e-11	8.48877e-13	2.35589e-11
Annotation Cluster 5	Enrichment Score: 16.569703433028405
Category	Term	Count	%	PValue	Genes	List Total	Pop Hits	Pop Total	Fold Enrichment	Bonferroni	Benjamini	FDR
GOTERM_MF_FAT	GO:0000166~nucleotide binding	483	16.3729	3.73287e-22	PGD, RFC38, GDH, CG8726, TBP-1, RPT3R, ILK, ROK, PGK, L(1)G0196, SPN-B, CG8097, SPN-A, LIG3, GEK, SPN-D, SPN-E, LIG4, IPK1, HRB98DE, SRP54K, GATA, MAN1, GNF1, PAR-1, SXL, CG7461, FAK56D, RAB6, RAB5, RAB4, SC35, RAB9, PKA-C1, PAST1, RAB8, RAB7, PIX, FU, RAC2, PIT, INR, RAC1, CG7597, SAR1, SPF45, PONT, RPS24, KP78A, SUUR, CG8078, KP78B, GISH, RB97D, KIF3C, GW, SNOO, RPT3, RPT4, CKIALPHA, OPA1-LIKE,…	2237	1206	7918	1.41759	5.15136e-19	2.57568e-19	6.13974e-19
GOTERM_MF_FAT	GO:0032555~purine ribonucleotide binding	378	12.8136	5.52187e-19	PVR, TLK, KH1, NOD, SHI, RFC38, GDH, CG8726, TBP-1, RAB27, CG8485, RPT3R, ILK, EIP63E, PKA-R1, ROK, RAB21, PGK, PROS26.4, L(2)K01209, CUTLET, L(1)G0196, KLP3A, CHB, SPN-B, CG8097, SPN-A, LIG3, GEK, SPN-D, SPN-E, LIG4, SAK, SPAS, MNB, IPK1, SRP54K, SUCB, GATA, T-CP1, RFC3, GWL, HBS1, RAB14, GNF1, EPH, CG9330, PAR-1, EFSEC, RAB10, RAB11, OTK, CG9886, NEK2, HEX-A, FAK56D, RAB6, RAB5, RAB4, MYT1, PKA…	2237	923	7918	1.44957	7.62018e-16	1.90505e-16	9.08224e-16
GOTERM_MF_FAT	GO:0032553~ribonucleotide binding	378	12.8136	5.52187e-19	PVR, TLK, KH1, NOD, SHI, RFC38, GDH, CG8726, TBP-1, RAB27, CG8485, RPT3R, ILK, EIP63E, PKA-R1, ROK, RAB21, PGK, PROS26.4, L(2)K01209, CUTLET, L(1)G0196, KLP3A, CHB, SPN-B, CG8097, SPN-A, LIG3, GEK, SPN-D, SPN-E, LIG4, SAK, SPAS, MNB, IPK1, SRP54K, SUCB, GATA, T-CP1, RFC3, GWL, HBS1, RAB14, GNF1, EPH, CG9330, PAR-1, EFSEC, RAB10, RAB11, OTK, CG9886, NEK2, HEX-A, FAK56D, RAB6, RAB5, RAB4, MYT1, PKA…	2237	923	7918	1.44957	7.62018e-16	1.90505e-16	9.08224e-16
GOTERM_MF_FAT	GO:0017076~purine nucleotide binding	396	13.4237	6.34744e-18	RFC38, GDH, CG8726, TBP-1, RPT3R, ILK, ROK, PGK, L(1)G0196, SPN-B, CG8097, SPN-A, LIG3, GEK, SPN-D, LIG4, SPN-E, IPK1, SRP54K, GATA, GNF1, PAR-1, CG7461, FAK56D, RAB6, RAB5, RAB4, PKA-C1, RAB9, PAST1, RAB8, RAB7, PIX, FU, PIT, RAC2, INR, RAC1, CG7597, SAR1, PONT, KP78A, SUUR, CG8078, KP78B, GISH, KIF3C, RPT3, RPT4, CKIALPHA, OPA1-LIKE, RAB1, MEI-W68, RPT1, PHL, GAP69C, NAK, MHCL, L(1)G0148, CKIIA…	2237	989	7918	1.41726	8.75946e-15	1.75189e-15	1.04401e-14
GOTERM_MF_FAT	GO:0032559~adenyl ribonucleotide binding	311	10.5424	4.00992e-16	PVR, TLK, KH1, NOD, RFC38, GDH, CG8726, TBP-1, CG8485, RPT3R, ILK, EIP63E, ROK, PKA-R1, PGK, PROS26.4, L(2)K01209, L(1)G0196, CUTLET, KLP3A, SPN-B, CG8097, SPN-A, LIG3, GEK, SPN-D, SPN-E, LIG4, SAK, SPAS, MNB, IPK1, SUCB, GATA, T-CP1, RFC3, GWL, GNF1, EPH, CG9330, PAR-1, OTK, CG9886, NEK2, HEX-A, FAK56D, MYT1, PKA-C1, RM62, PIX, FU, PIT, CG9990, STRN-MLCK, P38B, INR, CG7597, CG9323, POLO, CG6796,…	2237	750	7918	1.46774	6.12843e-13	8.75966e-14	7.32747e-13
GOTERM_MF_FAT	GO:0005524~ATP binding	310	10.5085	4.43105e-16	PVR, TLK, KH1, NOD, RFC38, GDH, CG8726, TBP-1, CG8485, RPT3R, ILK, EIP63E, ROK, PGK, PROS26.4, L(2)K01209, L(1)G0196, CUTLET, KLP3A, SPN-B, CG8097, SPN-A, LIG3, GEK, SPN-D, SPN-E, LIG4, SAK, SPAS, MNB, IPK1, SUCB, GATA, T-CP1, RFC3, GWL, GNF1, EPH, CG9330, PAR-1, OTK, CG9886, NEK2, HEX-A, FAK56D, MYT1, PKA-C1, RM62, PIX, FU, PIT, CG9990, STRN-MLCK, P38B, INR, CG7597, CG9323, POLO, CG6796, SAX, PO…	2237	748	7918	1.46693	6.12843e-13	7.66054e-14	7.32747e-13
GOTERM_MF_FAT	GO:0001882~nucleoside binding	333	11.2881	2.26181e-15	PVR, TLK, KH1, NOD, RFC38, GDH, CG8726, TBP-1, CG8485, RPT3R, ILK, EIP63E, ROK, PKA-R1, PGK, PROS26.4, L(2)K01209, L(1)G0196, CUTLET, KLP3A, SPN-B, CG8097, SPN-A, LIG3, GEK, SPN-D, SPN-E, LIG4, SAK, SPAS, MNB, IPK1, SUCB, GATA, T-CP1, RFC3, GWL, GNF1, EPH, CG9330, PAR-1, OTK, CG9886, NEK2, HEX-A, CG7461, FAK56D, MYT1, PKA-C1, RM62, PIX, FU, PIT, CG9990, STRN-MLCK, INR, P38B, CG7597, CG9323, ROE1,…	2237	824	7918	1.43043	3.06422e-12	3.40505e-13	3.65263e-12
GOTERM_MF_FAT	GO:0030554~adenyl nucleotide binding	328	11.1186	4.14343e-15	PVR, TLK, KH1, NOD, RFC38, GDH, CG8726, TBP-1, CG8485, RPT3R, ILK, EIP63E, ROK, PKA-R1, PGK, PROS26.4, L(2)K01209, L(1)G0196, CUTLET, KLP3A, SPN-B, CG8097, SPN-A, LIG3, GEK, SPN-D, SPN-E, LIG4, SAK, SPAS, MNB, IPK1, SUCB, GATA, T-CP1, RFC3, GWL, GNF1, EPH, CG9330, PAR-1, OTK, CG9886, NEK2, HEX-A, CG7461, FAK56D, MYT1, PKA-C1, RM62, PIX, FU, PIT, CG9990, STRN-MLCK, INR, P38B, CG7597, CG9323, ROE1,…	2237	812	7918	1.42977	5.6688e-12	5.6688e-13	6.76126e-12
GOTERM_MF_FAT	GO:0001883~purine nucleoside binding	329	11.1525	6.20009e-15	PVR, TLK, KH1, NOD, RFC38, GDH, CG8726, TBP-1, CG8485, RPT3R, ILK, EIP63E, ROK, PKA-R1, PGK, PROS26.4, L(2)K01209, L(1)G0196, CUTLET, KLP3A, SPN-B, CG8097, SPN-A, LIG3, GEK, SPN-D, SPN-E, LIG4, SAK, SPAS, MNB, IPK1, SUCB, GATA, T-CP1, RFC3, GWL, GNF1, EPH, CG9330, PAR-1, OTK, CG9886, NEK2, HEX-A, CG7461, FAK56D, MYT1, PKA-C1, RM62, PIX, FU, PIT, CG9990, STRN-MLCK, INR, P38B, CG7597, CG9323, ROE1,…	2237	817	7918	1.42536	8.5798e-12	7.79932e-13	1.02252e-11
Annotation Cluster 6	Enrichment Score: 15.582723665010631
Category	Term	Count	%	PValue	Genes	List Total	Pop Hits	Pop Total	Fold Enrichment	Bonferroni	Benjamini	FDR
GOTERM_BP_FAT	GO:0006366~transcription from RNA polymerase II promoter	81	2.74576	2.14269e-27	TAF10B, EAR, PBP45, SU(TPL), MED25, MED24, MED23, TBP, MED21, STIP, MED20, CYCC, TFIIEBETA, MED26, MED27, CYCH, TFIIB, RPII33, KTO, MAF-S, RPII15, RPII18, MED11, MED14, TAF12L, MED10, RPII215, RPII140, MED19, MED6, TAF11, MED7, TAF10, DSX, MED4, TAF13, TAF12, GAS41, MED15, MED16, MED17, MED8, MED18, TFIIEALPHA, TFIIFALPHA, MED1, SSL1, SPT5, SPT6, SPT3, SPT4, TFIIA-L, SS, PBP95, ELOA, HAY, TFIIA-S…	2266	99	7937	2.8658	6.86088e-24	5.2776e-25	3.88627e-24
GOTERM_BP_FAT	GO:0032774~RNA biosynthetic process	96	3.25424	7.58936e-24	TAF10B, EAR, PBP45, SU(TPL), MED25, MED24, MED23, TBP, MED21, STIP, MED20, DNAPOL-ALPHA50, PARP, CYCC, TFIIEBETA, MED26, RPIII128, RTF1, MED27, CYCH, TFIIB, RPII33, KTO, MAF-S, RPII15, RPII18, MED11, MED14, TAF12L, MED10, RPII215, RPII140, MED19, MED6, TAF11, MED7, TAF10, DSX, MED4, COQ2, TAF13, TAF12, GAS41, MED15, MED16, MED17, MED8, MED18, TFIIEALPHA, TFIIFALPHA, MED1, SSL1, DNAPOL-ALPHA73, SP…	2266	136	7937	2.47246	2.43011e-20	1.35006e-21	1.37651e-20
GOTERM_BP_FAT	GO:0006351~transcription, DNA-dependent	93	3.15254	1.18787e-22	TAF10B, EAR, PBP45, SU(TPL), MED25, MED24, MED23, TBP, MED21, STIP, MED20, PARP, CYCC, TFIIEBETA, MED26, RPIII128, RTF1, MED27, CYCH, TFIIB, RPII33, KTO, MAF-S, RPII15, RPII18, MED11, MED14, TAF12L, MED10, RPII215, RPII140, MED19, MED6, TAF11, MED7, TAF10, DSX, MED4, COQ2, TAF13, TAF12, GAS41, MED15, MED16, MED17, MED8, MED18, TFIIEALPHA, TFIIFALPHA, MED1, SSL1, SPT5, SPT6, SPT3, MTTFB2, SPT4, RP…	2266	133	7937	2.44922	3.80355e-19	2.00187e-20	2.15448e-19
GOTERM_BP_FAT	GO:0043933~macromolecular complex subunit organization	153	5.18644	3.5316e-20	EIF6, PATR-1, ROP, CHIC, TAF10B, CG7506, PBP45, SURF6, HIRA, DF31, MED25, MED24, MED23, TBP, MED21, STIP, MED20, HIS2AV, GAMMATUB23C, MED26, L(2)K14505, EIF-2ALPHA, MED27, TFIIB, KTO, CG7006, L(2)GL, HRS, MRG15, GEK, GEL, MED14, SPN-E, MED10, SRP54K, E(BX), GAS41, MED15, MED16, MED17, HBS1, SNAP, SLU7, SURF1, MSL-1, MSL-2, PUF68, FS(2)KET, FAK56D, SC35, HIS4R, CG7598, INR, NURF-38, KLP61F, EMB, M…	2266	281	7937	1.90714	1.13082e-16	5.6541e-18	6.40541e-17
GOTERM_MF_FAT	GO:0016251~general RNA polymerase II transcription factor activity	67	2.27119	1.93506e-19	TAF10B, EAR, GATAD, CG8290, MED25, MED24, MED23, TBP, ISWI, MED22, MED21, MED20, CYCC, TFIIEBETA, MED28, MED26, MED27, MOR, CYCH, TFIIB, KTO, DALAO, MED11, MED14, TAF12L, MED10, IX, MED6, MED19, TAF11, MED7, TAF10, TAF13, MED4, DOM, TAF12, GAS41, MED15, MED16, MED17, MED8, TFIIEALPHA, MED18, SNR1, TFIIFALPHA, CG6751, MED1, SSL1, SPT3, TFIIA-L, HAY, TFIIA-S, TAF2, TAF1, TAF4, TAF6, TAF5, TAF7, TFB…	2237	89	7918	2.66461	2.67038e-16	8.90127e-17	3.18274e-16
GOTERM_BP_FAT	GO:0065003~macromolecular complex assembly	133	4.50847	2.70786e-17	EIF6, PATR-1, ROP, CHIC, TAF10B, CG7506, PBP45, SURF6, MED25, DF31, MED24, MED23, TBP, MED21, STIP, MED20, HIS2AV, GAMMATUB23C, MED26, L(2)K14505, EIF-2ALPHA, MED27, TFIIB, KTO, CG7006, L(2)GL, HRS, GEL, MED14, SPN-E, MED10, SRP54K, E(BX), GAS41, MED15, MED16, MED17, SNAP, SLU7, SURF1, MSL-1, MSL-2, PUF68, FS(2)KET, FAK56D, SC35, HIS4R, CG7598, INR, KLP61F, EMB, GE-1, TAF2, RANBP16, NSF2, TAF1, S…	2266	246	7937	1.89371	8.67055e-14	2.89018e-15	4.91135e-14
GOTERM_BP_FAT	GO:0006367~transcription initiation from RNA polymerase II promoter	52	1.76271	6.749e-17	TAF10B, EAR, MED25, MED24, TBP, MED23, MED21, MED20, TFIIEBETA, CYCC, MED26, MED27, CYCH, TFIIB, KTO, MED14, TAF12L, MED10, MED6, TAF11, MED7, TAF10, TAF13, MED4, GAS41, TAF12, MED15, MED16, MED17, MED8, TFIIEALPHA, TFIIFALPHA, MED1, SSL1, SPT3, TFIIA-L, HAY, TFIIA-S, TAF2, TAF1, TAF4, TAF6, TAF5, TAF8, TAF7, TFB4, E(Y)1, TFB1, MED31, SKD, MAT1, TFIIFBETA	2266	65	7937	2.80212	3.55493e-13	1.07692e-14	1.9984e-13
GOTERM_BP_FAT	GO:0006352~transcription initiation	53	1.79661	3.95534e-14	TAF10B, EAR, MED25, MED24, TBP, MED23, MED21, MED20, TFIIEBETA, CYCC, MED26, MED27, RTF1, CYCH, TFIIB, KTO, MED14, TAF12L, MED10, MED6, TAF11, MED7, TAF10, TAF13, MED4, GAS41, TAF12, MED15, MED16, MED17, MED8, TFIIEALPHA, TFIIFALPHA, MED1, SSL1, SPT3, TFIIA-L, HAY, TFIIA-S, TAF2, TAF1, TAF4, TAF6, TAF5, TAF8, TAF7, TFB4, E(Y)1, TFB1, MED31, SKD, MAT1, TFIIFBETA	2266	73	7937	2.54302	1.26556e-10	2.43372e-12	7.16871e-11
GOTERM_BP_FAT	GO:0070271~protein complex biogenesis	91	3.08475	3.35568e-12	CHIC, ROP, TAF10B, EAR, CG7506, SURF6, MED25, MED24, MED23, EXP6, TBP, MED21, STIP, MED20, RANBP21, RANBP9, GAMMATUB23C, SUB, CG9065, CYCC, TFIIEBETA, MED26, MSK, L(2)K14505, RTF1, MED27, CYCH, TFIIB, KTO, KLP67A, L(2)GL, HRS, MED14, GEL, TAF12L, MED10, GAMMASNAP, SRP54K, MED6, TAF11, MED7, TAF10, MED4, TAF13, TAF12, GAS41, MED15, MED16, MED17, MED8, SNAP, TFIIEALPHA, TFIIFALPHA, SURF1, MED1, SSL…	2266	167	7937	1.90863	1.07448e-08	1.628e-10	6.08628e-09
GOTERM_BP_FAT	GO:0006461~protein complex assembly	91	3.08475	3.35568e-12	CHIC, ROP, TAF10B, EAR, CG7506, SURF6, MED25, MED24, MED23, EXP6, TBP, MED21, STIP, MED20, RANBP21, RANBP9, GAMMATUB23C, SUB, CG9065, CYCC, TFIIEBETA, MED26, MSK, L(2)K14505, RTF1, MED27, CYCH, TFIIB, KTO, KLP67A, L(2)GL, HRS, MED14, GEL, TAF12L, MED10, GAMMASNAP, SRP54K, MED6, TAF11, MED7, TAF10, MED4, TAF13, TAF12, GAS41, MED15, MED16, MED17, MED8, SNAP, TFIIEALPHA, TFIIFALPHA, SURF1, MED1, SSL…	2266	167	7937	1.90863	1.07448e-08	1.628e-10	6.08628e-09
GOTERM_MF_FAT	GO:0003702~RNA polymerase II transcription factor activity	125	4.23729	3.91803e-12	TAF10B, EWG, SHN, RFX, GATAD, CG8290, OVO, MED25, MED24, MED23, TBP, MED22, MED21, MED20, SIN3A, MED28, MED26, MED27, MOR, TFIIB, KTO, EXD, CROL, JRA, MED11, MED14, EIP74EF, FRU, MED10, NC2BETA, MED19, DSX, HSF, GAS41, MED15, MED16, MED17, MED18, MNT, CG6751, DEAF1, GRAU, LOLAL, DLL, SU(H), TAF2, TAF1, EIP78C, TAF4, TAF6, HB, TAF5, TAF8, TAF7, EMS, E(Y)1, ODD, SCM, CNC, GT, SKD, POP2, TFIIFBETA, …	2237	257	7918	1.72158	5.40696e-09	3.86212e-10	6.44438e-09
GOTERM_MF_FAT	GO:0016455~RNA polymerase II transcription mediator activity	28	0.949153	5.56325e-11	MED25, MED24, MED23, MED22, MED21, MED20, MED28, CYCC, MED26, MED27, KTO, MED11, MED14, MED10, IX, MED19, MED31, MED6, MED7, MED4, MED30, MED15, MED16, MED8, SKD, MED17, MED18, MED1	2237	32	7918	3.09712	7.67728e-08	4.51605e-09	9.1503e-08
GOTERM_BP_FAT	GO:0034621~cellular macromolecular complex subunit organization	102	3.45763	8.52073e-11	EIF6, CHIC, ROP, PATR-1, PBP45, CG7506, SURF6, DF31, HIRA, TBP, STIP, HIS2AV, GAMMATUB23C, L(2)K14505, EIF-2ALPHA, L(2)GL, CG7006, HRS, MRG15, GEK, GEL, SPN-E, E(BX), SRP54K, GAS41, HBS1, SNAP, SLU7, SURF1, MSL-1, MSL-2, FS(2)KET, PUF68, FAK56D, SC35, HIS4R, NURF-38, CG7598, EMB, MUS201, PONT, GE-1, TAF2, RANBP16, TAF1, NSF2, SRP54, MLE, DDX1, TKV, ME31B, R2D2, LAP, MEI-W68, CG7338, SOP2, NAP1, N…	2266	203	7937	1.75995	2.72834e-07	3.20981e-09	1.54544e-07
GOTERM_BP_FAT	GO:0034622~cellular macromolecular complex assembly	81	2.74576	3.48169e-08	EIF6, PATR-1, CHIC, ROP, PBP45, CG7506, SURF6, RBP1-LIKE, DF31, TBP, EXP6, ISWI, STIP, HIS2AV, RANBP21, HIS3.3B, RANBP9, GAMMATUB23C, MCM7, SUB, CG9065, HIS3.3A, MSK, L(2)K14505, EIF-2ALPHA, KLP67A, L(2)GL, CG7006, HRS, SF2, GEL, SPN-E, MCM2, MCM3, MCM5, GAMMASNAP, E(BX), MCM6, SRP54K, SMN, SNAP, ENOK, SLU7, SURF1, MSL-1, MSL-2, DCR-1, PUF68, FS(2)KET, FAK56D, SC35, DCR-2, EIF-2BETA, NUP214, SET,…	2266	165	7937	1.71948	0.000111477	8.84791e-07	6.31487e-05
Annotation Cluster 7	Enrichment Score: 14.469304885742526
Category	Term	Count	%	PValue	Genes	List Total	Pop Hits	Pop Total	Fold Enrichment	Bonferroni	Benjamini	FDR
GOTERM_BP_FAT	GO:0006350~transcription	245	8.30508	1.88619e-30	PDP1, PBP45, SU(TPL), MED25, OVO, HIRA, MED24, MED23, MED22, MED21, MED20, DNAPOL-ALPHA50, DM, MED28, NOT, MED26, MED27, SMOX, TFIIB, RPII33, KTO, MRG15, RPII15, RPII18, SIN, MED11, JRA, MED14, EIP74EF, FRU, RPD3, MED10, E(BX), FRY, RPII215, MED19, GAS41, MED15, MED16, MED17, MED18, MSL-3, GNF1, L(2)NC136, SXL, KEN, DEAF1, MTTFB2, DLL, LOLAL, LIN, N, NURF-38, EMC, CG6907, LID, PONT, EIP78C, CUP, …	2266	459	7937	1.86961	6.03957e-27	8.62796e-28	3.42105e-27
GOTERM_BP_FAT	GO:0045449~regulation of transcription	328	11.1186	1.45892e-15	PDP1, LUNA, SHN, SU(TPL), MED25, OVO, HIRA, MED24, MED23, MED22, MED21, MOF, MED20, DM, SIN3A, CG9727, MED28, MED26, NOT, MED27, MOR, SMOX, TFIIB, KTO, E(R), MRG15, PH-D, RPII15, RNO, MED11, JRA, MED14, SPN-E, FRU, GEM, EIP74EF, MED10, RPD3, E(BX), MNF, FRY, MED19, GAS41, MED15, MED16, MED17, PH-P, MED18, MSL-3, GNF1, MNT, L(2)NC136, SXL, DEAF1, KEN, SBB, MTTFB2, DLL, LOLAL, LIN, N, ODSH, PKA-C1,…	2266	799	7937	1.43788	4.62141e-12	1.12688e-13	2.62013e-12
GOTERM_BP_FAT	GO:0006357~regulation of transcription from RNA polymerase II promoter	105	3.55932	4.29312e-14	SHN, OVO, MED25, MED24, MED23, TBP, MED22, MED21, MED20, MIP40, MED28, HTH, MED26, MED27, TFIIB, KTO, E(R), EXD, CROL, MED11, JRA, MED14, MED10, NC2BETA, MED19, DSX, HSF, MED15, MED16, MED17, MED18, DEAF1, GRAU, SBB, LOLAL, LIN, N, EMC, CG6907, SU(H), TAF2, TAF1, TAF4, NELF-E, TAF5, NELF-A, E(Y)2, E(Y)1, NELF-B, CTBP, ODD, GT, MIP130, SKD, RBF2, LIN-52, POP2, E2F2, HH, ESG, L(3)MBT, NC2ALPHA, CYC…	2266	192	7937	1.91551	1.37576e-10	2.59581e-12	7.79266e-11
GOTERM_MF_FAT	GO:0030528~transcription regulator activity	277	9.38983	4.25962e-13	PDP1, LILLI, LUNA, SHN, LGS, SU(TPL), MED25, OVO, HIRA, MED24, MED23, MED22, MED21, MED20, DM, SIN3A, MED28, MED26, MED27, MOR, SMOX, TFIIB, KTO, E(R), RPII15, MED11, JRA, MED14, FRU, GEM, EIP74EF, MED10, RPD3, MNF, FRY, MED19, PCF11, GAS41, MED15, MED16, MED17, MED18, MSL-3, MNT, L(2)NC136, DEAF1, KEN, SBB, MTTFB2, DLL, LOLAL, N, ODSH, CG9609, MRPL55, EMC, LID, PONT, EIP78C, NK7.1, HB, FU2, CG93…	2237	682	7918	1.43762	5.8787e-10	4.89891e-11	7.00662e-10
GOTERM_MF_FAT	GO:0003702~RNA polymerase II transcription factor activity	125	4.23729	3.91803e-12	TAF10B, EWG, SHN, RFX, GATAD, CG8290, OVO, MED25, MED24, MED23, TBP, MED22, MED21, MED20, SIN3A, MED28, MED26, MED27, MOR, TFIIB, KTO, EXD, CROL, JRA, MED11, MED14, EIP74EF, FRU, MED10, NC2BETA, MED19, DSX, HSF, GAS41, MED15, MED16, MED17, MED18, MNT, CG6751, DEAF1, GRAU, LOLAL, DLL, SU(H), TAF2, TAF1, EIP78C, TAF4, TAF6, HB, TAF5, TAF8, TAF7, EMS, E(Y)1, ODD, SCM, CNC, GT, SKD, POP2, TFIIFBETA, …	2237	257	7918	1.72158	5.40696e-09	3.86212e-10	6.44438e-09
GOTERM_BP_FAT	GO:0051252~regulation of RNA metabolic process	274	9.28814	4.45362e-12	PDP1, LUNA, SHN, MED25, OVO, HIRA, MED24, MED23, MED22, MED21, MED20, DM, SIN3A, MED28, CG9727, NOT, MED26, MED27, MOR, SMOX, TFIIB, KTO, E(R), MRG15, PH-D, RNO, MED11, JRA, MED14, SPN-E, EIP74EF, HRB98DE, RPD3, MED10, MNF, MED19, GAS41, MED15, MED16, MED17, PH-P, MED18, SXL, FUS, KEN, DEAF1, SBB, MTTFB2, DLL, LOLAL, LIN, N, SC35, ODSH, RM62, CG9705, EMC, SPF45, CG6907, EIP78C, SRP54, NK7.1, DMT,…	2266	678	7937	1.41552	1.42606e-08	2.12845e-10	8.07778e-09
GOTERM_BP_FAT	GO:0006355~regulation of transcription, DNA-dependent	239	8.10169	5.9064e-09	PDP1, LUNA, SHN, OVO, HIRA, MED25, MED24, MED23, MED22, MED21, MED20, DM, SIN3A, MED28, CG9727, NOT, MED26, MED27, MOR, SMOX, TFIIB, KTO, E(R), MRG15, PH-D, RNO, JRA, MED11, MED14, EIP74EF, SPN-E, RPD3, MED10, MNF, MED19, GAS41, MED15, MED16, MED17, PH-P, MED18, KEN, DEAF1, SBB, MTTFB2, DLL, LOLAL, LIN, N, ODSH, CG9705, EMC, CG6907, EIP78C, NK7.1, DMT, SCE, EMS, HR39, ODD, HR38, GT, MIP130, SKD, …	2266	612	7937	1.36786	1.89121e-05	1.73507e-07	1.07127e-05
Annotation Cluster 8	Enrichment Score: 13.507440685788751
Category	Term	Count	%	PValue	Genes	List Total	Pop Hits	Pop Total	Fold Enrichment	Bonferroni	Benjamini	FDR
GOTERM_BP_FAT	GO:0009791~post-embryonic development	212	7.18644	4.37186e-20	CHIC, SHN, LGS, GEF26, ED, MOE, DS, ILK, EIP63E, SMOX, DG, IMPE1, ROK, IMPE3, CV-C, SPAG, JRA, EIP74EF, FRY, E(BX), SNAP, PH-P, SHOT, SURF1, DLT, F, SBB, FZ, DLL, M, N, FW, PKA-C1, RAB7, PPAN, FT, P38B, S, NURF-38, HFW, RAC1, PIO, FJ, SAR1, EMC, SAX, EIP78C, CYP1, SCA, PYR, TKV, MKP3, EMP, MLD, PTPMEG, ODD, RCA1, PHL, HEPH, L(1)G0148, G9A, THS, L(2)GD1, ISWI, PTEN, RL, SOCS36E, SCU, SRPRBETA, CG9…	2266	434	7937	1.71097	1.39987e-16	6.66604e-18	7.92941e-17
GOTERM_BP_FAT	GO:0002165~instar larval or pupal development	204	6.91525	2.75046e-19	CHIC, SHN, LGS, GEF26, ED, MOE, DS, ILK, EIP63E, SMOX, DG, IMPE1, ROK, IMPE3, CV-C, SPAG, JRA, EIP74EF, FRY, E(BX), SNAP, PH-P, SHOT, SURF1, DLT, F, SBB, FZ, DLL, M, N, FW, PKA-C1, RAB7, FT, P38B, S, NURF-38, HFW, RAC1, PIO, FJ, SAR1, EMC, SAX, EIP78C, CYP1, SCA, TKV, MKP3, EMP, MLD, PTPMEG, ODD, RCA1, PHL, HEPH, L(1)G0148, G9A, L(2)GD1, ISWI, PTEN, RL, SOCS36E, SCU, SRPRBETA, CG9769, MAF-S, ERF1…	2266	418	7937	1.70943	8.80698e-16	3.82912e-17	4.98862e-16
GOTERM_BP_FAT	GO:0007552~metamorphosis	178	6.0339	2.60324e-17	CHIC, DSH, EWG, SPI, SHN, LGS, ED, GEF26, MOE, DAD, MMP1, S6KII, CNK, RAS85D, HTH, DS, ILK, EIP63E, DG, SMOX, IMPE1, CG8149, ROK, IMPE3, L(2)GL, EGFR, JUMU, CV-C, SQH, MRTF, SPAG, CROL, POT, JRA, CP1, COS, DARE, EIP74EF, FRY, MIB1, DSX, SNAP, NC, SHOT, DLT, PAN, FRTZ, F, SBB, SDS22, CKS30A, FZ, DLL, FNG, M, CORA, N, MIRR, FW, PKA-C1, RAB7, SU(DX), FT, P38B, S, RAC1, PIO, FJ, EMC, SAX, CYP1, SCA, …	2266	362	7937	1.7223	8.33558e-14	2.87434e-15	4.7216e-14
GOTERM_BP_FAT	GO:0009886~post-embryonic morphogenesis	174	5.89831	4.55086e-17	CHIC, DSH, SPI, EWG, SHN, LGS, ED, GEF26, MOE, DAD, MMP1, S6KII, CNK, RAS85D, HTH, DS, ILK, DG, SMOX, IMPE1, CG8149, ROK, IMPE3, L(2)GL, EGFR, JUMU, CV-C, SQH, MRTF, SPAG, CROL, POT, JRA, CP1, COS, EIP74EF, FRY, MIB1, DSX, SNAP, NC, SHOT, DLT, PAN, FRTZ, F, SBB, SDS22, CKS30A, FZ, DLL, FNG, M, CORA, N, MIRR, FW, PKA-C1, RAB7, SU(DX), FT, P38B, S, RAC1, PIO, FJ, EMC, SAX, CYP1, SCA, FLW, RHO1, TKV…	2266	353	7937	1.72652	1.45718e-13	4.7006e-15	8.25407e-14
GOTERM_BP_FAT	GO:0007444~imaginal disc development	196	6.64407	4.64005e-17	LILLI, CHIC, SHN, LGS, SU(TPL), GEF26, ED, MOE, MPCP, DS, ILK, SMOX, DG, IMPE1, ROK, IMPE3, CV-C, SPAG, JRA, EX, FRY, SNAP, INVADOLYSIN, SHOT, SXL, KEN, DLT, F, SBB, SU(VAR)2-10, FZ, L, DLL, M, LIN, N, FW, PKA-C1, PPAN, FT, P38B, INR, S, RAC1, PIO, SAV, FJ, EMC, SAX, LAMA, SCA, TKV, MKP3, DSP1, ODD, RCA1, SKD, PHL, RHEB, HEPH, G9A, L(2)GD1, RL, SOCS36E, SPEN, MYS, DGO, TIMP, ELB, SNR1, PX, TAK1, …	2266	412	7937	1.66631	1.48574e-13	4.64295e-15	8.41583e-14
GOTERM_BP_FAT	GO:0048569~post-embryonic organ development	151	5.11864	3.30534e-16	CHIC, DSH, SPI, EWG, SHN, LGS, ED, GEF26, MOE, DAD, MMP1, S6KII, CNK, RAS85D, HTH, DS, ILK, SMOX, DG, IMPE1, ROK, IMPE3, L(2)GL, EGFR, JUMU, CV-C, SQH, MRTF, SPAG, CROL, POT, JRA, COS, FRY, DSX, MIB1, SNAP, KIRRE, SHOT, DLT, PAN, FRTZ, F, SBB, SDS22, CKS30A, FZ, DLL, FNG, M, CORA, N, MIRR, FW, PKA-C1, SU(DX), FT, P38B, S, RAC1, PIO, FJ, EMC, SAX, SCA, PYR, FLW, RHO1, TKV, MKP3, ODD, RCA1, PHL, HE…	2266	297	7937	1.78081	1.06648e-12	2.9643e-14	5.9952e-13
GOTERM_BP_FAT	GO:0048707~instar larval or pupal morphogenesis	170	5.76271	3.3578e-16	CHIC, DSH, SPI, EWG, SHN, LGS, ED, GEF26, MOE, DAD, MMP1, S6KII, CNK, RAS85D, HTH, DS, ILK, SMOX, DG, IMPE1, CG8149, ROK, IMPE3, L(2)GL, EGFR, JUMU, CV-C, SQH, MRTF, SPAG, CROL, POT, JRA, CP1, COS, EIP74EF, FRY, MIB1, DSX, SNAP, NC, SHOT, DLT, PAN, FRTZ, F, SBB, SDS22, CKS30A, FZ, DLL, FNG, M, CORA, N, MIRR, FW, PKA-C1, RAB7, SU(DX), FT, P38B, S, RAC1, PIO, FJ, EMC, SAX, CYP1, SCA, FLW, RHO1, TKV…	2266	347	7937	1.71599	1.06648e-12	2.88658e-14	5.9952e-13
GOTERM_BP_FAT	GO:0048563~post-embryonic organ morphogenesis	144	4.88136	2.43025e-15	CHIC, DSH, SPI, EWG, SHN, LGS, ED, GEF26, MOE, DAD, MMP1, S6KII, CNK, RAS85D, HTH, DS, ILK, SMOX, DG, IMPE1, ROK, IMPE3, L(2)GL, EGFR, JUMU, CV-C, SQH, MRTF, SPAG, CROL, POT, JRA, COS, FRY, DSX, MIB1, SNAP, SHOT, DLT, PAN, FRTZ, F, SBB, SDS22, CKS30A, FZ, DLL, FNG, M, CORA, N, MIRR, FW, PKA-C1, SU(DX), FT, P38B, S, RAC1, PIO, FJ, EMC, SAX, SCA, FLW, RHO1, TKV, MKP3, ODD, RCA1, PHL, HEPH, GLI, KSR…	2266	284	7937	1.77599	7.82086e-12	1.81855e-13	4.42979e-12
GOTERM_BP_FAT	GO:0007560~imaginal disc morphogenesis	144	4.88136	2.43025e-15	CHIC, DSH, SPI, EWG, SHN, LGS, ED, GEF26, MOE, DAD, MMP1, S6KII, CNK, RAS85D, HTH, DS, ILK, SMOX, DG, IMPE1, ROK, IMPE3, L(2)GL, EGFR, JUMU, CV-C, SQH, MRTF, SPAG, CROL, POT, JRA, COS, FRY, DSX, MIB1, SNAP, SHOT, DLT, PAN, FRTZ, F, SBB, SDS22, CKS30A, FZ, DLL, FNG, M, CORA, N, MIRR, FW, PKA-C1, SU(DX), FT, P38B, S, RAC1, PIO, FJ, EMC, SAX, SCA, FLW, RHO1, TKV, MKP3, ODD, RCA1, PHL, HEPH, GLI, KSR…	2266	284	7937	1.77599	7.82086e-12	1.81855e-13	4.42979e-12
GOTERM_BP_FAT	GO:0035220~wing disc development	141	4.77966	1.46705e-14	LILLI, DSH, SPI, SHN, LGS, SU(TPL), ED, GEF26, DRPR, MPCP, DAD, S6KII, CNK, RAS85D, HTH, DS, ILK, SMOX, DG, CG8149, ROK, EGFR, JUMU, CV-C, SQH, MRTF, CROL, POT, COS, FRY, MIB1, PP2B-14D, SNAP, CPA, CPB, CG8405, SHOT, PAN, FRTZ, F, SBB, FZ, DLL, FNG, LIN, M, CORA, N, MIRR, FW, PKA-C1, SU(DX), FT, P38B, S, RAC1, PIO, FJ, EMC, SAX, EGG, SU(H), SCA, FLW, RHO1, TKV, MKP3, SET2, SKD, PHL, HEPH, GLI, KS…	2266	281	7937	1.75756	4.69251e-11	9.38472e-13	2.65787e-11
GOTERM_BP_FAT	GO:0007472~wing disc morphogenesis	111	3.76271	8.09599e-12	SPI, DSH, SHN, LGS, ED, GEF26, DAD, CNK, S6KII, RAS85D, HTH, DS, ILK, SMOX, DG, ROK, EGFR, JUMU, CV-C, SQH, MRTF, CROL, POT, COS, FRY, MIB1, SNAP, SHOT, PAN, FRTZ, F, SBB, FZ, FNG, DLL, M, N, CORA, MIRR, FW, PKA-C1, SU(DX), FT, P38B, S, RAC1, FJ, PIO, EMC, SAX, SCA, FLW, RHO1, TKV, MKP3, PHL, HEPH, GLI, KSR, HH, L(2)GD1, MBS, G-SALPHA60A, RL, SOCS36E, HOW, MSK, DALLY, IF, LIMK1, SPEN, PTC, MYS, D…	2266	220	7937	1.76725	2.59233e-08	3.65117e-10	1.4684e-08
GOTERM_BP_FAT	GO:0007476~imaginal disc-derived wing morphogenesis	109	3.69492	2.61113e-11	SPI, DSH, SHN, LGS, ED, GEF26, DAD, CNK, S6KII, RAS85D, HTH, DS, ILK, SMOX, DG, ROK, EGFR, JUMU, CV-C, SQH, MRTF, CROL, POT, COS, FRY, MIB1, SNAP, SHOT, PAN, FRTZ, F, SBB, FZ, FNG, DLL, M, N, CORA, MIRR, FW, PKA-C1, SU(DX), FT, P38B, S, RAC1, FJ, PIO, EMC, SAX, SCA, FLW, RHO1, TKV, MKP3, PHL, HEPH, GLI, KSR, HH, L(2)GD1, MBS, G-SALPHA60A, RL, SOCS36E, HOW, MSK, DALLY, IF, LIMK1, SPEN, PTC, MYS, D…	2266	218	7937	1.75132	8.36081e-08	1.08582e-09	4.7359e-08
GOTERM_BP_FAT	GO:0035120~post-embryonic appendage morphogenesis	112	3.79661	7.72463e-11	SPI, DSH, SHN, LGS, ED, GEF26, DAD, CNK, S6KII, RAS85D, HTH, DS, ILK, SMOX, DG, ROK, EGFR, JUMU, CV-C, SQH, MRTF, CROL, POT, COS, FRY, MIB1, SNAP, SHOT, PAN, FRTZ, F, SBB, FZ, FNG, DLL, M, N, CORA, MIRR, FW, PKA-C1, SU(DX), FT, P38B, S, RAC1, FJ, PIO, EMC, SAX, SCA, FLW, RHO1, TKV, MKP3, ODD, PHL, HEPH, GLI, KSR, HH, L(2)GD1, MBS, G-SALPHA60A, RL, SOCS36E, HOW, MSK, DALLY, IF, LIMK1, SPEN, PTC, M…	2266	229	7937	1.71309	2.47343e-07	2.94456e-09	1.40105e-07
GOTERM_BP_FAT	GO:0048737~imaginal disc-derived appendage development	116	3.9322	2.29901e-10	SPI, DSH, SHN, LGS, ED, GEF26, DAD, CNK, S6KII, RAS85D, HTH, DS, ILK, SMOX, DG, ROK, EGFR, JUMU, CV-C, SQH, MRTF, CROL, POT, COS, FRY, MIB1, SNAP, SYX1A, SHOT, PAN, FRTZ, F, SBB, FZ, FNG, DLL, M, N, CORA, MIRR, FW, PKA-C1, SU(DX), FT, P38B, S, RAC1, FJ, PIO, EMC, SAX, SCA, FLW, RHO1, TKV, MKP3, ODD, PHL, HEPH, GLI, KSR, HH, L(2)GD1, MBS, G-SALPHA60A, RL, SOCS36E, HOW, MSK, DALLY, IF, LIMK1, SPEN,…	2266	243	7937	1.67205	7.36142e-07	8.17936e-09	4.1698e-07
GOTERM_BP_FAT	GO:0048736~appendage development	116	3.9322	5.85806e-10	SPI, DSH, SHN, LGS, ED, GEF26, DAD, CNK, S6KII, RAS85D, HTH, DS, ILK, SMOX, DG, ROK, EGFR, JUMU, CV-C, SQH, MRTF, CROL, POT, COS, FRY, MIB1, SNAP, SYX1A, SHOT, PAN, FRTZ, F, SBB, FZ, FNG, DLL, M, N, CORA, MIRR, FW, PKA-C1, SU(DX), FT, P38B, S, RAC1, FJ, PIO, EMC, SAX, SCA, FLW, RHO1, TKV, MKP3, ODD, PHL, HEPH, GLI, KSR, HH, L(2)GD1, MBS, G-SALPHA60A, RL, SOCS36E, HOW, MSK, DALLY, IF, LIMK1, SPEN,…	2266	246	7937	1.65166	1.87575e-06	1.95391e-08	1.0625e-06
GOTERM_BP_FAT	GO:0035114~imaginal disc-derived appendage morphogenesis	113	3.83051	8.25396e-10	SPI, DSH, SHN, LGS, ED, GEF26, DAD, CNK, S6KII, RAS85D, HTH, DS, ILK, SMOX, DG, ROK, EGFR, JUMU, CV-C, SQH, MRTF, CROL, POT, COS, FRY, MIB1, SNAP, SHOT, PAN, FRTZ, F, SBB, FZ, FNG, DLL, M, N, CORA, MIRR, FW, PKA-C1, SU(DX), FT, P38B, S, RAC1, FJ, PIO, EMC, SAX, SCA, FLW, RHO1, TKV, MKP3, ODD, PHL, HEPH, GLI, KSR, HH, L(2)GD1, MBS, G-SALPHA60A, RL, SOCS36E, HOW, MSK, DALLY, IF, LIMK1, SPEN, PTC, M…	2266	239	7937	1.65606	2.64291e-06	2.66961e-08	1.49705e-06
GOTERM_BP_FAT	GO:0035107~appendage morphogenesis	113	3.83051	2.04813e-09	SPI, DSH, SHN, LGS, ED, GEF26, DAD, CNK, S6KII, RAS85D, HTH, DS, ILK, SMOX, DG, ROK, EGFR, JUMU, CV-C, SQH, MRTF, CROL, POT, COS, FRY, MIB1, SNAP, SHOT, PAN, FRTZ, F, SBB, FZ, FNG, DLL, M, N, CORA, MIRR, FW, PKA-C1, SU(DX), FT, P38B, S, RAC1, FJ, PIO, EMC, SAX, SCA, FLW, RHO1, TKV, MKP3, ODD, PHL, HEPH, GLI, KSR, HH, L(2)GD1, MBS, G-SALPHA60A, RL, SOCS36E, HOW, MSK, DALLY, IF, LIMK1, SPEN, PTC, M…	2266	242	7937	1.63553	6.55808e-06	6.30587e-08	3.71477e-06
Annotation Cluster 9	Enrichment Score: 11.610175990223706
Category	Term	Count	%	PValue	Genes	List Total	Pop Hits	Pop Total	Fold Enrichment	Bonferroni	Benjamini	FDR
GOTERM_BP_FAT	GO:0060429~epithelium development	132	4.47458	5.13962e-19	CHIC, DSH, SHN, ED, SHI, MOE, PNR, CNO, RHOGEF2, DAD, SHG, RAS85D, SINU, DS, EIP63E, STAN, RALA, DG, ROK, L(2)GL, EGFR, JUMU, CV-C, SQH, MYO10A, JRA, KNK, SQD, SEC61ALPHA, PATJ, PAR-6, PH-P, KUK, SLMB, RAB11, SHOT, DLT, FRTZ, CG6982, SDS22, PAK, FZ, SAC1, SHARK, N, CORA, MIRR, PYD, RIN, FT, MMY, RAC2, FLFL, INR, RAC1, FJ, EMC, EGH, SCB, LAC, SCA, RHO1, FPS85D, SCE, TKV, MKP3, SCM, LKB1, LAM, CNI,…	2266	235	7937	1.96744	1.6457e-15	6.8571e-17	9.32192e-16
GOTERM_BP_FAT	GO:0002009~morphogenesis of an epithelium	126	4.27119	4.86028e-18	CHIC, DSH, SHN, ED, SHI, MOE, PNR, CNO, RHOGEF2, DAD, SHG, RAS85D, DS, EIP63E, STAN, RALA, DG, ROK, L(2)GL, EGFR, JUMU, CV-C, SQH, MYO10A, JRA, KNK, SQD, SEC61ALPHA, PATJ, PAR-6, PH-P, KUK, SLMB, RAB11, SHOT, DLT, FRTZ, SDS22, PAK, FZ, SAC1, SHARK, N, CORA, MIRR, PYD, RIN, FT, MMY, RAC2, FLFL, INR, RAC1, FJ, EMC, EGH, SCB, LAC, SCA, RHO1, FPS85D, SCE, TKV, MKP3, SCM, LKB1, CNI, LAM, MTL, PHL, ENA…	2266	225	7937	1.96148	1.55626e-14	5.76394e-16	8.81529e-15
GOTERM_BP_FAT	GO:0048729~tissue morphogenesis	132	4.47458	2.35566e-16	CHIC, DSH, SHN, ED, SHI, MOE, PNR, CNO, RHOGEF2, DAD, SHG, RAS85D, DS, EIP63E, STAN, RALA, DG, ROK, L(2)GL, EGFR, JUMU, CV-C, SQH, MRTF, MYO10A, JRA, KNK, SQD, SEC61ALPHA, PATJ, PAR-6, PH-P, KUK, SLMB, RAB11, SHOT, DLT, PAN, FRTZ, SDS22, PAK, FZ, SAC1, SHARK, N, CORA, MIRR, PYD, RIN, FT, MMY, RAC2, FLFL, INR, RAC1, FJ, EMC, EGH, SCB, LAC, SCA, PYR, RHO1, FPS85D, SCE, TKV, MKP3, SCM, LKB1, LAM, CN…	2266	247	7937	1.87186	7.10987e-13	2.03171e-14	3.9968e-13
GOTERM_BP_FAT	GO:0007391~dorsal closure	59	2	3.26595e-11	CHIC, DSH, SHN, ED, MBS, CNO, PNR, CKA, KAY, RAS85D, PKN, RALA, MSN, MBC, ROK, L(2)GL, DLG1, EGFR, HEP, RAW, JUMU, CV-C, MYO10A, JRA, SEC61ALPHA, MYS, SLPR, DOK, RAB11, TAK1, NRX-IV, PAK, SAC1, SHARK, N, CORA, PUC, PYD, DPP, STCK, MMY, RAC2, FLFL, INR, RAC1, SRC42A, EMC, NMT, GBB, SCB, MAD, RHO1, FPS85D, TKV, CRB, LKB1, MTL, ENA, PUT	2266	95	7937	2.17533	1.04576e-07	1.34072e-09	5.92359e-08
GOTERM_BP_FAT	GO:0016331~morphogenesis of embryonic epithelium	68	2.30508	2.66231e-10	CHIC, DSH, SHN, ED, MBS, CNO, PNR, RHOGEF2, CKA, KAY, KKV, RAS85D, PKN, RALA, MSN, MBC, ROK, DLG1, L(2)GL, EGFR, HEP, RAW, JUMU, CV-C, FOG, MYO10A, JRA, KNK, PATJ, SEC61ALPHA, MYS, SLPR, DOK, SDT, PAR-6, KUK, RAB11, TAK1, NRX-IV, PAK, SAC1, SHARK, N, CORA, PUC, PYD, STCK, DPP, MMY, RAC2, FLFL, INR, RAC1, SRC42A, EMC, NMT, GBB, SCB, LAC, MAD, RHO1, FPS85D, TKV, CRB, LKB1, MTL, ENA, PUT	2266	120	7937	1.98483	8.52472e-07	9.26601e-09	4.82874e-07
GOTERM_BP_FAT	GO:0048598~embryonic morphogenesis	107	3.62712	2.22392e-09	CHIC, DSH, SHN, ED, PNR, CNO, RHOGEF2, SHG, RAS85D, LACK, RALA, ROK, L(2)GL, EGFR, JUMU, CV-C, MRTF, MYO10A, CP309, KNK, JRA, SEC61ALPHA, PATJ, RIC8A, PAR-6, KUK, FLII, RAB11, NC, PAN, PAK, SAC1, SHARK, LIN, N, CORA, PYD, T48, MMY, RAC2, FLFL, INR, RAC1, EMC, PIM, EGH, SCB, LAC, PYR, RHO1, LANB2, FPS85D, LANB1, TKV, LKB1, LANA, MTL, PHL, ENA, CHRB, THR, RHOGAP68F, PCM, MBS, CKA, RL, KKV, KAY, PKN…	2266	226	7937	1.65833	7.12097e-06	6.71792e-08	4.03361e-06
GOTERM_BP_FAT	GO:0001700~embryonic development via the syncytial blastoderm	97	3.28814	1.90868e-07	CHIC, DSH, SHN, ED, HMGS, PNR, CNO, MEI-41, SHG, CP190, RAS85D, LACK, EIP63E, RALA, ROK, L(2)GL, EGFR, JUMU, CV-C, SEMA-5C, SQH, MYO10A, JRA, SEC61ALPHA, SCED, KIRRE, RAB11, NC, PAK, LOLAL, SAC1, SHARK, N, CORA, MIRR, PYD, RAC2, MMY, FLFL, INR, RAC1, EMC, SCB, RHO1, FPS85D, DDX1, TKV, EMS, CTBP, GW, LAR, LKB1, MTL, SOP2, ENA, CHRB, THR, MBS, CKA, KAY, PKN, L(3)MBT, SEMA-1B, CYCB, MSN, MBC, ORCT2,…	2266	214	7937	1.58765	0.000610973	4.27383e-06	0.000346184
GOTERM_BP_FAT	GO:0009792~embryonic development ending in birth or egg hatching	99	3.35593	6.05014e-07	CHIC, DSH, SHN, ED, HMGS, PNR, CNO, MEI-41, SHG, CP190, RAS85D, DM, LACK, EIP63E, RALA, ROK, L(2)GL, EGFR, JUMU, CV-C, SEMA-5C, SQH, MYO10A, JRA, SEC61ALPHA, SCED, KIRRE, RAB11, NC, DEAF1, PAK, LOLAL, SAC1, SHARK, N, CORA, MIRR, PYD, RAC2, MMY, FLFL, INR, RAC1, EMC, SCB, RHO1, FPS85D, DDX1, TKV, EMS, CTBP, GW, LAR, LKB1, MTL, SOP2, ENA, CHRB, THR, MBS, CKA, KAY, PKN, L(3)MBT, SEMA-1B, CYCB, MSN, …	2266	224	7937	1.54805	0.00193538	1.2745e-05	0.00109733
Annotation Cluster 10	Enrichment Score: 10.488534645165974
Category	Term	Count	%	PValue	Genes	List Total	Pop Hits	Pop Total	Fold Enrichment	Bonferroni	Benjamini	FDR
GOTERM_BP_FAT	GO:0030029~actin filament-based process	81	2.74576	6.86149e-12	PVR, CHIC, LILLI, DAH, CIP4, ED, MOE, RHOGEF2, PTEN, MEI-41, PAK3, DAAM, LOCO, ROK, CHER, PKA-R1, IF, L(2)GL, HEP, HEM, LIMK1, CYCT, MRTF, SRA-1, PBL, GEK, GEL, PNUT, GGAMMA1, GRO, GCKIII, FORM3, SCRA, PAV, SCED, CPA, FLII, CPB, STI, CTP, RAB11, RDGA, SHOT, LARK, F, IK2, FS(2)KET, GBETA13F, KEL, DCP-1, N, PUC, SKTL, HSP83, RAC2, SRC42A, RAC1, DIA, SAX, RHOGAP18B, SCAR, SSH, G-IALPHA65A, S6K, RHO1…	2266	144	7937	1.97024	2.19706e-08	3.13865e-10	1.2445e-08
GOTERM_BP_FAT	GO:0030036~actin cytoskeleton organization	80	2.71186	1.36669e-11	PVR, CHIC, LILLI, DAH, CIP4, ED, MOE, RHOGEF2, PTEN, MEI-41, PAK3, DAAM, LOCO, ROK, CHER, PKA-R1, IF, L(2)GL, HEP, HEM, LIMK1, CYCT, MRTF, SRA-1, PBL, GEK, GEL, PNUT, GGAMMA1, GRO, GCKIII, FORM3, SCRA, PAV, SCED, CPA, FLII, CPB, STI, CTP, RAB11, RDGA, SHOT, LARK, F, IK2, FS(2)KET, GBETA13F, KEL, DCP-1, N, PUC, SKTL, HSP83, RAC2, SRC42A, RAC1, DIA, SAX, RHOGAP18B, SCAR, SSH, G-IALPHA65A, S6K, RHO1…	2266	143	7937	1.95952	4.37612e-08	5.91368e-10	2.47881e-08
GOTERM_BP_FAT	GO:0007015~actin filament organization	52	1.76271	3.65013e-10	PVR, CHIC, ED, RHOGEF2, PTEN, MEI-41, PAK3, DAAM, PKA-R1, CHER, HEP, CYCT, GEK, GEL, GGAMMA1, GRO, GCKIII, SCED, CPA, CPB, CTP, RDGA, F, IK2, FS(2)KET, GBETA13F, DCP-1, N, PUC, HSP83, RAC2, RAC1, SRC42A, DIA, SAX, RHOGAP18B, SCAR, S6K, RHO1, FPS85D, DRK, HTS, SN, MTS, RAB1, SOS, SOP2, MTL, ENA, CG7497, SB, SRY-ALPHA	2266	83	7937	2.19443	1.16877e-06	1.25674e-08	6.62039e-07
Annotation Cluster 11	Enrichment Score: 10.276085009465536
Category	Term	Count	%	PValue	Genes	List Total	Pop Hits	Pop Total	Fold Enrichment	Bonferroni	Benjamini	FDR
GOTERM_BP_FAT	GO:0007059~chromosome segregation	75	2.54237	4.08146e-15	MOD(MDG4), EB1, THR, NOD, NNF1B, NNF1A, CNN, MEI-41, SUB, ROD, SU(VAR)2-HP2, CYCA, CYCB, ORC5, FIM, JIL-1, KLP67A, ORC2, EIF-4E, KLP3A, CHB, PP1-87B, CMET, MEI-9, KLP10A, MCM5, GRP, IAL, NCD, DP1, MUS312, PAV, KMN1, INVADOLYSIN, ECO, MEI-S332, GRAU, GAP1, RAB5, OAF, PROS54, NUDE, SPC25, SAN, HIS4R, EAST, TEF, POLO, PIM, RANGAP, MEI-218, MIT(1)15, CUP, SCA, FLW, TOC, LWR, SCE, SMC5, NUF2, GLU, NDC…	2266	117	7937	2.24529	1.31533e-11	2.98983e-13	7.4496e-12
GOTERM_BP_FAT	GO:0048285~organelle fission	84	2.84746	1.49508e-11	PDP1, PITA, THR, NNF1B, GRIP71, NNF1A, PINK1, IDA, CNN, SYX13, RL, SUB, SKELETOR, ROD, SU(VAR)2-HP2, GRIP75, PARK, CYCA, CYCB, ORC5, MYB, ROK, KLP67A, ORC2, EIF-4E, PP1-87B, CHB, DHC64C, CMET, DIM1, MCM2, SPAS, MR, KLP10A, MCM6, TACC, PR-SET7, MAD2, LIS-1, IAL, NCD, SCRA, ITP-R83A, KMN1, PELO, INVADOLYSIN, ECO, MEI-S332, GAP1, NEK2, RAB5, NUDE, SPC25, SAN, CKS85A, EAST, LMG, CG8315, POLO, KLP61F,…	2266	153	7937	1.92302	4.78722e-08	6.38296e-10	2.71167e-08
GOTERM_BP_FAT	GO:0000087~M phase of mitotic cell cycle	81	2.74576	4.45651e-11	PDP1, PITA, THR, NNF1B, GRIP71, NNF1A, IDA, CNN, SYX13, RL, SUB, SKELETOR, ROD, SU(VAR)2-HP2, GRIP75, CYCA, CYCB, ORC5, MYB, ROK, KLP67A, ORC2, EIF-4E, PP1-87B, CHB, DHC64C, CMET, DIM1, MCM2, SPAS, MR, KLP10A, MCM6, TACC, PR-SET7, MAD2, LIS-1, IAL, NCD, SCRA, KMN1, PELO, INVADOLYSIN, ECO, MEI-S332, GAP1, NEK2, RAB5, NUDE, SPC25, SAN, CKS85A, EAST, LMG, SMT3, POLO, KLP61F, PIM, CORTO, MIT(1)15, TO…	2266	148	7937	1.91699	1.42698e-07	1.7617e-09	8.08295e-08
GOTERM_BP_FAT	GO:0000280~nuclear division	81	2.74576	4.45651e-11	PDP1, PITA, THR, NNF1B, GRIP71, NNF1A, IDA, CNN, SYX13, RL, SUB, SKELETOR, ROD, SU(VAR)2-HP2, GRIP75, CYCA, CYCB, ORC5, MYB, ROK, KLP67A, ORC2, EIF-4E, PP1-87B, CHB, DHC64C, CMET, DIM1, MCM2, SPAS, MR, KLP10A, MCM6, TACC, PR-SET7, MAD2, LIS-1, IAL, NCD, SCRA, ITP-R83A, KMN1, PELO, INVADOLYSIN, ECO, MEI-S332, GAP1, NEK2, RAB5, NUDE, SPC25, SAN, CKS85A, EAST, LMG, POLO, KLP61F, PIM, CORTO, MIT(1)15…	2266	148	7937	1.91699	1.42698e-07	1.7617e-09	8.08295e-08
GOTERM_BP_FAT	GO:0007067~mitosis	80	2.71186	5.51387e-11	PDP1, PITA, THR, NNF1B, GRIP71, NNF1A, IDA, CNN, SYX13, RL, SUB, SKELETOR, ROD, SU(VAR)2-HP2, GRIP75, CYCA, CYCB, ORC5, MYB, ROK, KLP67A, ORC2, EIF-4E, PP1-87B, CHB, DHC64C, CMET, DIM1, MCM2, SPAS, MR, KLP10A, MCM6, TACC, PR-SET7, MAD2, LIS-1, IAL, NCD, SCRA, KMN1, PELO, INVADOLYSIN, ECO, MEI-S332, GAP1, NEK2, RAB5, NUDE, SPC25, SAN, CKS85A, EAST, LMG, POLO, KLP61F, PIM, CORTO, MIT(1)15, TOC, SMC…	2266	146	7937	1.91926	1.76554e-07	2.12716e-09	1.00007e-07
GOTERM_BP_FAT	GO:0000070~mitotic sister chromatid segregation	33	1.11864	8.75838e-09	ECO, THR, NNF1B, NNF1A, NUDE, SAN, SPC25, SU(VAR)2-HP2, ROD, CYCA, CYCB, ORC5, PIM, ORC2, KLP67A, MIT(1)15, EIF-4E, PP1-87B, CHB, TOC, SMC5, NUF2, GLU, CMET, NDC80, SSE, KLP10A, SMC2, IAL, NEB, KMN1, NIPPED-B, INVADOLYSIN	2266	46	7937	2.51277	2.80439e-05	2.50396e-07	1.58854e-05
GOTERM_BP_FAT	GO:0000819~sister chromatid segregation	33	1.11864	1.99552e-08	ECO, THR, NNF1B, NNF1A, NUDE, SAN, SPC25, SU(VAR)2-HP2, ROD, CYCA, CYCB, ORC5, PIM, ORC2, KLP67A, MIT(1)15, EIF-4E, PP1-87B, CHB, TOC, SMC5, NUF2, GLU, CMET, NDC80, SSE, KLP10A, SMC2, IAL, NEB, KMN1, NIPPED-B, INVADOLYSIN	2266	47	7937	2.45931	6.38946e-05	5.19485e-07	3.61936e-05
Annotation Cluster 12	Enrichment Score: 9.87570287693963
Category	Term	Count	%	PValue	Genes	List Total	Pop Hits	Pop Total	Fold Enrichment	Bonferroni	Benjamini	FDR
GOTERM_BP_FAT	GO:0048477~oogenesis	230	7.79661	5.06933e-13	PVR, CHIC, STAU, GEF26, ED, OVO, SHI, TM1, MOE, SHG, DM, MOR, DG, ROK, PKA-R1, CHB, PP1-87B, SPN-B, SPN-A, SPN-F, JRA, SPN-D, EIP74EF, SPN-E, SLMO, RPD3, PAR-6, PH-P, SLMB, PELO, RAB11, KEK1, SXL, FS(2)KET, KEL, RAB6, RAB5, N, MYT1, GUS, PKA-C1, PPAN, FU, RAC2, S, RAC1, PIP, SAX, NUDC, LIC, SCAR, CUP, SCE, TKV, SCM, MIP130, LKB1, DCP1, ENC, SOP2, PHL, ENA, CHIF, EXBA, CORTACTIN, PVF1, GEMININ, OK…	2266	539	7937	1.49464	1.62318e-09	2.84769e-11	9.19431e-10
GOTERM_BP_FAT	GO:0007292~female gamete generation	232	7.86441	6.75082e-13	PVR, CHIC, STAU, GEF26, ED, OVO, SHI, TM1, MOE, SHG, DM, MOR, DG, ROK, PKA-R1, CHB, PP1-87B, SPN-B, SPN-A, SPN-F, JRA, SPN-D, EIP74EF, SPN-E, SLMO, RPD3, PAR-6, PH-P, SLMB, PELO, RAB11, KEK1, SXL, FS(2)KET, KEL, RAB6, RAB5, N, MYT1, GUS, PKA-C1, PPAN, FU, RAC2, INR, S, RAC1, PIP, SAX, NUDC, LIC, SCAR, CUP, SCE, TKV, SCM, MIP130, LKB1, DCP1, ENC, SOP2, PHL, ENA, CHIF, EXBA, CORTACTIN, PVF1, GEMINI…	2266	546	7937	1.4883	2.16176e-09	3.60293e-11	1.22451e-09
GOTERM_BP_FAT	GO:0003006~reproductive developmental process	218	7.38983	7.17467e-13	PVR, CHIC, STAU, PGC, GEF26, ED, OVO, SHI, TM1, MOD, MOE, RHOGEF2, SHG, DG, ROK, PKA-R1, CHC, CHB, SPN-B, SPN-A, SPN-F, JRA, SPN-D, FRU, SAK, SPN-E, PAR-6, PH-P, SLMB, PELO, INVADOLYSIN, RAB11, SXL, KEN, FS(2)KET, KEL, DLL, RAB6, RAB5, N, MYT1, GUS, PKA-C1, FU, RAC2, INR, RAC1, PIP, EMC, DLC90F, SAX, SCAT, LIC, CUP, SCE, TKV, OUT, RB97D, CUE, SCM, MIP130, LKB1, DCP1, JANB, ENC, PHL, HEPH, ENA, CH…	2266	506	7937	1.50905	2.2972e-09	3.7659e-11	1.30123e-09
GOTERM_BP_FAT	GO:0048610~reproductive cellular process	213	7.22034	5.16435e-12	PVR, CHIC, STAU, PGC, ED, HIRA, SHI, TM1, MOD, MOE, RHOGEF2, SHG, DG, ROK, PKA-R1, STAI, CHC, CHB, KLP3A, SPN-B, SPN-A, SPN-F, JRA, SPN-D, SAK, SPN-E, PAR-6, PH-P, SLMB, PELO, INVADOLYSIN, RAB11, SXL, FS(2)KET, KEL, RAB6, RAB5, N, MYT1, GUS, PKA-C1, RAC2, INR, RAC1, PIP, POLO, EMC, DLC90F, SAX, SCAT, LIC, SCAR, CUP, SCE, TKV, OUT, RB97D, CUE, SCM, MIP130, LKB1, DCP1, SOP2, PHL, ENC, HEPH, ENA, CH…	2266	500	7937	1.49213	1.65361e-08	2.39654e-10	9.36672e-09
GOTERM_BP_FAT	GO:0007276~gamete generation	281	9.52542	8.98636e-11	PVR, CHIC, STAU, PGC, GEF26, ED, OVO, TM1, SHI, MOD, MOE, RHOGEF2, SHG, DM, MOR, DG, ROK, PKA-R1, STAI, CHC, PP1-87B, CHB, SPN-B, SPN-A, SPN-F, JRA, SPN-D, SPN-E, EIP74EF, SAK, SLMO, RPD3, IMP, PAR-6, PH-P, SLMB, PELO, INVADOLYSIN, RAB11, KEK1, SXL, FS(2)KET, KEL, RAB6, RAB5, N, MYT1, PKA-C1, GUS, PPAN, FU, RAC2, INR, S, RAC1, PIP, EMC, DLC90F, SAX, SCAT, NUDC, SCAR, LIC, CUP, SCE, GISH, TKV, OUT…	2266	715	7937	1.37657	2.87743e-07	3.34585e-09	1.62989e-07
GOTERM_BP_FAT	GO:0019953~sexual reproduction	286	9.69492	2.11691e-10	PVR, CHIC, STAU, PGC, GEF26, ED, OVO, HIRA, TM1, SHI, MOD, MOE, NOI, RHOGEF2, SHG, DM, MOR, DG, ROK, PKA-R1, STAI, CHC, PP1-87B, KLP3A, CHB, SPN-B, SPN-A, SPN-F, JRA, SPN-D, SPN-E, EIP74EF, SAK, SLMO, RPD3, IMP, PAR-6, PH-P, SLMB, PELO, INVADOLYSIN, RAB11, KEK1, SXL, FS(2)KET, KEL, RAB6, RAB5, N, MYT1, PKA-C1, GUS, PPAN, FU, RAC2, INR, S, RAC1, PIP, EMC, POLO, DLC90F, SAX, SCAT, NUDC, SCAR, LIC, …	2266	735	7937	1.36294	6.77835e-07	7.70267e-09	3.83953e-07
GOTERM_BP_FAT	GO:0032504~multicellular organism reproduction	288	9.76271	6.64284e-08	PVR, CHIC, STAU, PGC, GEF26, ED, OVO, TM1, SHI, MOD, MOE, RHOGEF2, GDH, SHG, DM, MOR, DG, ROK, PKA-R1, STAI, CHC, PP1-87B, CHB, SPN-B, SPN-A, SPN-F, JRA, SPN-D, SPN-E, FRU, EIP74EF, SAK, SLMO, RPD3, IMP, PAR-6, PH-P, SLMB, PELO, INVADOLYSIN, RAB11, KEK1, SXL, KEN, SK2, FS(2)KET, KEL, RAB6, RAB5, N, MYT1, PKA-C1, GUS, PPAN, FU, RAC2, INR, S, RAC1, PIP, EMC, DLC90F, SAX, SCAT, NUDC, SCAR, LIC, NONA…	2266	778	7937	1.29661	0.000212681	1.59928e-06	0.000120484
GOTERM_BP_FAT	GO:0048609~reproductive process in a multicellular organism	288	9.76271	6.64284e-08	PVR, CHIC, STAU, PGC, GEF26, ED, OVO, TM1, SHI, MOD, MOE, RHOGEF2, GDH, SHG, DM, MOR, DG, ROK, PKA-R1, STAI, CHC, PP1-87B, CHB, SPN-B, SPN-A, SPN-F, JRA, SPN-D, SPN-E, FRU, EIP74EF, SAK, SLMO, RPD3, IMP, PAR-6, PH-P, SLMB, PELO, INVADOLYSIN, RAB11, KEK1, SXL, KEN, SK2, FS(2)KET, KEL, RAB6, RAB5, N, MYT1, PKA-C1, GUS, PPAN, FU, RAC2, INR, S, RAC1, PIP, EMC, DLC90F, SAX, SCAT, NUDC, SCAR, LIC, NONA…	2266	778	7937	1.29661	0.000212681	1.59928e-06	0.000120484
GOTERM_BP_FAT	GO:0007281~germ cell development	108	3.66102	1.23468e-07	CHIC, STAU, PGC, LOK, SHI, TM1, MOD, MOE, DIDUM, SHG, RAS85D, JAGN, DG, ROK, PKA-R1, L(2)GL, EGFR, CHC, CHB, FMR1, SPN-F, SQD, SAK, SPN-E, CHICO, PAR-6, SLMB, POE, PELO, RAB11, NC, SXL, PUF68, RAB6, N, MAGO, MYT1, GUS, PKA-C1, EGL, RAC2, INR, PIP, EMC, SAX, DLC90F, SCAT, EGH, LIC, MER, OX, TKV, OUT, HTS, RB97D, CNC, GLO, DCP1, LKB1, CNI, ENC, HEPH, EFF, E2F2, HH, SEC5, FWS, SLL, HEM, EIF-4A, DHC6…	2266	243	7937	1.55673	0.000395267	2.88573e-06	0.000223939
Annotation Cluster 13	Enrichment Score: 8.924279037225947
Category	Term	Count	%	PValue	Genes	List Total	Pop Hits	Pop Total	Fold Enrichment	Bonferroni	Benjamini	FDR
GOTERM_BP_FAT	GO:0032989~cellular component morphogenesis	240	8.13559	5.70834e-19	CHIC, LIPRIN-ALPHA, NOD, GEF26, ED, MED24, TM1, MOE, SHG, SIN3A, DS, NOT, STAN, SMOX, DG, ROK, FAX, TANGO10, CHB, PP1-87B, SEMA-5C, JRA, MED11, SPN-D, SAK, SPN-E, RPD3, RIC8A, E(BX), PAR-6, PH-P, EPHRIN, SLMB, FLII, EPH, SHOT, OTK, SBB, SEMA-2A, MOB2, FZ, PLEXB, RAB5, PLEXA, M, N, GUS, GTP-BP, PYD, FT, RAC2, MMY, INR, RAC1, FJ, SCAR, SCB, SCA, SCE, MLE, EMS, PTPMEG, OSM-6, SCM, MIP130, LKB1, OPA1…	2266	518	7937	1.62285	1.82781e-15	7.31124e-17	1.03534e-15
GOTERM_BP_FAT	GO:0000902~cell morphogenesis	209	7.08475	8.73091e-18	CHIC, LIPRIN-ALPHA, NOD, GEF26, MED24, TM1, MOE, SHG, SIN3A, NOT, DS, STAN, SMOX, DG, ROK, FAX, TANGO10, CHB, PP1-87B, SEMA-5C, JRA, MED11, RPD3, E(BX), RIC8A, PAR-6, PH-P, EPHRIN, SLMB, EPH, SHOT, OTK, SBB, SEMA-2A, MOB2, FZ, PLEXB, PLEXA, M, RAB5, N, GTP-BP, PYD, FT, MMY, RAC2, INR, RAC1, FJ, SCAR, SCB, SCA, SCE, MLE, EMS, PTPMEG, OSM-6, SCM, LKB1, LANA, SOP2, PHL, ENA, EXBA, ELONGIN-C, NOT1, S…	2266	442	7937	1.65623	2.79564e-14	9.98442e-16	1.58356e-14
GOTERM_BP_FAT	GO:0030182~neuron differentiation	192	6.50847	9.85991e-16	LILLI, SINA, DSH, SPI, RFX, LIPRIN-ALPHA, GEF26, TM1, MED24, MOE, DAB, DIDUM, DAD, SHG, CNK, RAS85D, DAW, SIN3A, HTH, NOT, NIPP1, HMGD, STAN, SMOX, CG9104, FAX, TANGO10, EGFR, E(Z), JUMU, RNO, CHB, PP1-87B, SEMA-5C, FMR1, JRA, MED11, EX, NETB, RPD3, FRY, E(BX), EDL, PH-P, EPHRIN, EPH, SHOT, RAB11, OTK, SBB, SEMA-2A, PAK, FZ, PLEXB, PLEXA, N, GTP-BP, RIN, MMY, RPS29, RAC2, INR, S, RAC1, SAV, EMC, …	2266	409	7937	1.64427	3.19944e-12	8.20455e-14	1.80966e-12
GOTERM_BP_FAT	GO:0048666~neuron development	158	5.35593	9.72985e-12	LILLI, DSH, SPI, RFX, LIPRIN-ALPHA, GEF26, TM1, MED24, MOE, DAB, DIDUM, DAD, SHG, DAW, SIN3A, NOT, NIPP1, HMGD, STAN, SMOX, CG9104, FAX, TANGO10, E(Z), JUMU, RNO, CHB, PP1-87B, SEMA-5C, FMR1, MED11, NETB, RPD3, FRY, E(BX), EDL, PH-P, EPHRIN, EPH, SHOT, RAB11, OTK, SBB, SEMA-2A, PAK, FZ, PLEXB, PLEXA, N, GTP-BP, MMY, RAC2, RPS29, INR, S, RAC1, EGH, SCAR, SSH, SCB, LAC, TAF4, RHO1, FPS85D, MLE, EMS…	2266	347	7937	1.59487	3.11551e-08	4.26782e-10	1.76475e-08
GOTERM_BP_FAT	GO:0000904~cell morphogenesis involved in differentiation	136	4.61017	1.04357e-09	DSH, RFX, LIPRIN-ALPHA, GEF26, MED24, TM1, DAD, SHG, DAW, SIN3A, JAGN, NOT, DS, NIPP1, HMGD, STAN, SMOX, CG9104, FAX, TANGO10, E(Z), JUMU, CHB, PP1-87B, SEMA-5C, FMR1, MED11, NETB, RPD3, E(BX), EPHRIN, PH-P, SLMB, EPH, SHOT, OTK, SBB, SEMA-2A, PAK, FZ, PLEXB, PLEXA, N, GTP-BP, FT, MMY, INR, RAC1, EGH, SCAR, SSH, SCB, LAC, TAF4, RHO1, FPS85D, SCE, MLE, EMS, PTPMEG, SCM, MBF1, LAR, NEDD4, LANA, SOP…	2266	303	7937	1.57215	3.34151e-06	3.276e-08	1.89277e-06
GOTERM_BP_FAT	GO:0030030~cell projection organization	157	5.32203	2.0535e-09	PVR, DSH, RFX, LIPRIN-ALPHA, GEF26, OVO, MED24, TM1, DAD, SHG, SAS-4, DAW, SIN3A, NOT, DS, NIPP1, HMGD, STAN, SMOX, ROK, CG9104, FAX, TANGO10, EGFR, E(Z), JUMU, CHB, PP1-87B, SQH, SEMA-5C, MYO10A, FMR1, MED11, SAK, NETB, RPD3, FRY, E(BX), EPHRIN, EPH, SHOT, FRTZ, OTK, F, SBB, SEMA-2A, PAK, FZ, PLEXB, PLEXA, CORA, OSEG4, N, GTP-BP, OSEG1, FT, MMY, RAC2, OSEG6, INR, RAC1, DTR, EGH, SCAR, SSH, SCB, …	2266	365	7937	1.50662	6.57528e-06	6.26219e-08	3.72451e-06
GOTERM_BP_FAT	GO:0048667~cell morphogenesis involved in neuron differentiation	128	4.33898	7.20077e-09	DSH, RFX, LIPRIN-ALPHA, GEF26, MED24, TM1, DAD, SHG, DAW, SIN3A, NOT, NIPP1, HMGD, STAN, SMOX, CG9104, FAX, TANGO10, E(Z), JUMU, CHB, PP1-87B, SEMA-5C, FMR1, MED11, NETB, RPD3, E(BX), EPHRIN, EPH, SHOT, OTK, SBB, SEMA-2A, PAK, FZ, PLEXB, PLEXA, N, GTP-BP, MMY, INR, RAC1, EGH, SCAR, SSH, SCB, LAC, TAF4, RHO1, FPS85D, MLE, EMS, PTPMEG, SCM, MBF1, LAR, NEDD4, LANA, SOP2, ENA, EXBA, ELONGIN-C, SEC15,…	2266	288	7937	1.55673	2.30566e-05	2.09608e-07	1.30603e-05
GOTERM_BP_FAT	GO:0048812~neuron projection morphogenesis	127	4.30508	8.85745e-09	DSH, RFX, LIPRIN-ALPHA, GEF26, MED24, TM1, DAD, SHG, DAW, SIN3A, NOT, NIPP1, HMGD, STAN, SMOX, CG9104, FAX, TANGO10, E(Z), JUMU, CHB, PP1-87B, SEMA-5C, FMR1, MED11, NETB, RPD3, E(BX), EPHRIN, EPH, SHOT, OTK, SBB, SEMA-2A, PAK, FZ, PLEXB, PLEXA, N, GTP-BP, MMY, INR, RAC1, EGH, SCAR, SSH, SCB, LAC, TAF4, RHO1, FPS85D, MLE, EMS, PTPMEG, SCM, MBF1, LAR, NEDD4, LANA, SOP2, ENA, EXBA, ELONGIN-C, SEC15,…	2266	286	7937	1.55537	2.83611e-05	2.50987e-07	1.60651e-05
GOTERM_BP_FAT	GO:0031175~neuron projection development	127	4.30508	1.14424e-08	DSH, RFX, LIPRIN-ALPHA, GEF26, MED24, TM1, DAD, SHG, DAW, SIN3A, NOT, NIPP1, HMGD, STAN, SMOX, CG9104, FAX, TANGO10, E(Z), JUMU, CHB, PP1-87B, SEMA-5C, FMR1, MED11, NETB, RPD3, E(BX), EPHRIN, EPH, SHOT, OTK, SBB, SEMA-2A, PAK, FZ, PLEXB, PLEXA, N, GTP-BP, MMY, INR, RAC1, EGH, SCAR, SSH, SCB, LAC, TAF4, RHO1, FPS85D, MLE, EMS, PTPMEG, SCM, MBF1, LAR, NEDD4, LANA, SOP2, ENA, EXBA, ELONGIN-C, SEC15,…	2266	287	7937	1.54995	3.66379e-05	3.1315e-07	2.07535e-05
GOTERM_BP_FAT	GO:0006928~cell motion	133	4.50847	1.49429e-08	PVR, SPI, DSH, HMGCR, PGC, LIPRIN-ALPHA, GEF26, SHI, DAD, SHG, RAS85D, DAW, NOT, NIPP1, STAN, SMOX, STAI, HRS, E(Z), EGFR, CV-C, CHB, PP1-87B, SQH, MRTF, SEMA-5C, CP309, FMR1, SQD, NETB, PAR-6, EPHRIN, CPB, SLMB, INVADOLYSIN, SHOT, OTK, SBB, SEMA-2A, KEL, PAK, PLEXB, RAB5, PLEXA, N, RAC2, INR, RAC1, NUMB, EGH, CG6905, SCB, CUP, ROC1B, HB, RHO1, FPS85D, OUT, GISH, PTPMEG, LAR, NEDD4, LANA, PHL, MT…	2266	305	7937	1.52738	4.7846e-05	3.98726e-07	2.71025e-05
GOTERM_BP_FAT	GO:0032990~cell part morphogenesis	141	4.77966	3.15557e-08	DSH, RFX, LIPRIN-ALPHA, GEF26, MED24, TM1, DAD, SHG, SAS-4, DAW, SIN3A, NOT, NIPP1, HMGD, STAN, SMOX, CG9104, FAX, TANGO10, E(Z), JUMU, CHB, PP1-87B, SEMA-5C, FMR1, MED11, NETB, RPD3, E(BX), EPHRIN, EPH, SHOT, OTK, SBB, SEMA-2A, PAK, FZ, PLEXB, PLEXA, N, OSEG4, GTP-BP, OSEG1, MMY, OSEG6, INR, RAC1, DTR, EGH, SCAR, SSH, SCB, LAC, TAF4, RHO1, FPS85D, MLE, EMS, PTPMEG, OSM-6, SCM, MBF1, LAR, OPA1-LI…	2266	331	7937	1.49206	0.000101036	8.08331e-07	5.72339e-05
GOTERM_BP_FAT	GO:0048858~cell projection morphogenesis	135	4.57627	1.27895e-07	DSH, RFX, LIPRIN-ALPHA, GEF26, MED24, TM1, DAD, SHG, SAS-4, DAW, SIN3A, NOT, NIPP1, HMGD, STAN, SMOX, CG9104, FAX, TANGO10, E(Z), JUMU, CHB, PP1-87B, SEMA-5C, FMR1, MED11, NETB, RPD3, E(BX), EPHRIN, EPH, SHOT, OTK, SBB, SEMA-2A, PAK, FZ, PLEXB, PLEXA, N, OSEG4, GTP-BP, OSEG1, MMY, OSEG6, INR, RAC1, DTR, EGH, SCAR, SSH, SCB, LAC, TAF4, RHO1, FPS85D, MLE, EMS, PTPMEG, OSM-6, SCM, MBF1, LAR, NEDD4, …	2266	320	7937	1.47768	0.000409436	2.96753e-06	0.000231968
GOTERM_BP_FAT	GO:0007409~axonogenesis	88	2.98305	2.07795e-06	HH, DSH, SDC, GEF26, LIPRIN-ALPHA, DAD, SHG, DAW, SGF11, SEMA-1B, SLI, NOT, ROBO, NIPP1, STAN, SMOX, DALLY, PTP99A, FAX, IF, E(Z), HEP, HEM, PP1-87B, CHB, SEMA-5C, SRA-1, FMR1, SPEN, PTC, NETB, RAS, MYS, FAS1, FAS3, EPHRIN, EPH, GALPHA49B, JING, SHOT, NRG, OTK, SBB, SEMA-2A, HSC70-4, ECR, PAK, FZ, PLEXB, PLEXA, N, FRA, FRAY, GTP-BP, EIF-2BETA, CHI, MMY, INR, RAC1, EGH, SCAR, SSH, KO, SCB, LAC, PT…	2266	198	7937	1.55673	0.0066315	3.9138e-05	0.00376879
GOTERM_BP_FAT	GO:0007411~axon guidance	61	2.0678	6.74208e-05	SDC, LIPRIN-ALPHA, DAD, SHG, DAW, SEMA-1B, SLI, ROBO, NIPP1, STAN, SMOX, PTP99A, IF, E(Z), CHB, PP1-87B, SEMA-5C, SRA-1, FMR1, SPEN, PTC, NETB, RAS, MYS, FAS1, FAS3, EPHRIN, GALPHA49B, JING, SHOT, OTK, SEMA-2A, HSC70-4, SBB, PAK, PLEXB, PLEXA, N, FRA, EIF-2BETA, CHI, INR, RAC1, EGH, KO, SCB, PTP69D, RHO1, FPS85D, DRL, PTPMEG, LEA, LAR, NEDD4, LANA, PTP61F, ENA, EXBA, TOK, PUT, SEC15	2266	136	7937	1.57104	0.194175	0.000817426	0.122213
GOTERM_BP_FAT	GO:0016358~dendrite development	53	1.79661	0.000160504	NOT1, RFX, TM1, MED24, ISWI, ESC, L(3)MBT, SIN3A, MI-2, ROBO, HMGD, STAN, SHRB, ROBL, SMOX, DALLY, CG9104, TANGO10, E(Z), JUMU, MED11, DHC64C, RPD3, E(BX), GRO, MED4, LIS-1, SNR1, SHOT, NRG, ECR, FRA, E2F, DPN, ETS21C, RAC1, CHM, TAF4, TGO, PTP69D, RHO1, SU(Z)12, D4, PYGO, TAB2, SIRT2, MBF1, CI, PUM, PCAF, ENA, ELONGIN-C, PUT	2266	117	7937	1.58667	0.401886	0.00177688	0.290712
GOTERM_BP_FAT	GO:0048813~dendrite morphogenesis	53	1.79661	0.000160504	NOT1, RFX, TM1, MED24, ISWI, ESC, L(3)MBT, SIN3A, MI-2, ROBO, HMGD, STAN, SHRB, ROBL, SMOX, DALLY, CG9104, TANGO10, E(Z), JUMU, MED11, DHC64C, RPD3, E(BX), GRO, MED4, LIS-1, SNR1, SHOT, NRG, ECR, FRA, E2F, DPN, ETS21C, RAC1, CHM, TAF4, TGO, PTP69D, RHO1, SU(Z)12, D4, PYGO, TAB2, SIRT2, MBF1, CI, PUM, PCAF, ENA, ELONGIN-C, PUT	2266	117	7937	1.58667	0.401886	0.00177688	0.290712
Annotation Cluster 14	Enrichment Score: 8.482840507429401
Category	Term	Count	%	PValue	Genes	List Total	Pop Hits	Pop Total	Fold Enrichment	Bonferroni	Benjamini	FDR
GOTERM_BP_FAT	GO:0008104~protein localization	206	6.98305	1.92274e-24	CHMP1, CG8831, CHIC, ROP, MOL, STAU, SRP68, TAMO, GDI, GOS28, MOE, TAPDELTA, SHG, MYS45A, RAB27, ILK, DG, ROK, RAB21, TANKYRASE, CHC, CHB, SRP54K, KDELR, RIC8A, PAR-6, SNAP, RAB14, SRP72, RAB10, MRPL45, P115, RAB11, G, FS(2)KET, FAK56D, FZ, SARA, RAB6, RAB5, RAB4, RAB9, RAB8, GTP-BP, RAB7, RAC2, S, ROE1, CG7456, SAR1, POLO, EMB, SCAT, NUP58, RANBP16, GGA, EXO70, CG7787, TIM10, RAB1, RANBP11, RG, …	2266	392	7937	1.84068	6.15661e-21	4.1044e-22	3.48735e-21
GOTERM_BP_FAT	GO:0045184~establishment of protein localization	147	4.98305	2.26943e-16	ROP, CHMP1, CG8831, SRP14, CLBN, MOL, LT, PNUTS, KAP-ALPHA3, SRP68, KAP-ALPHA1, TAMO, CG8004, GDI, GOS28, SYX13, SRP19, SYX16, RAS85D, MYS45A, RAB27, LPR1, HTH, SCAMP, ROK, CG8683, RAB21, L(2)GL, CHC, HRS, EXD, MYO10A, SEC61ALPHA, SEC61BETA, POR, SRP54K, KDELR, SNAP, RAB14, SYX1A, SRP72, RAB10, MRPL45, P115, RAB11, CG9132, SH3PX1, G, SNX6, FS(2)KET, CG8176, RAB6, RAB5, RAB4, CORA, CG9393, RAB9, R…	2266	285	7937	1.80663	7.10987e-13	2.08722e-14	3.9968e-13
GOTERM_BP_FAT	GO:0015031~protein transport	143	4.84746	6.42399e-16	ROP, CHMP1, CG8831, SRP14, CLBN, MOL, LT, PNUTS, KAP-ALPHA3, SRP68, KAP-ALPHA1, TAMO, CG8004, GDI, GOS28, SYX13, SRP19, SYX16, RAS85D, MYS45A, RAB27, LPR1, HTH, SCAMP, CG8683, RAB21, CHC, HRS, EXD, MYO10A, SEC61ALPHA, SEC61BETA, POR, SRP54K, KDELR, SNAP, RAB14, SYX1A, SRP72, RAB10, MRPL45, P115, RAB11, CG9132, SH3PX1, G, SNX6, FS(2)KET, CG8176, RAB6, RAB5, RAB4, CORA, CG9393, RAB9, RAB8, GTP-BP, …	2266	278	7937	1.80172	2.13296e-12	5.61773e-14	1.21014e-12
GOTERM_BP_FAT	GO:0046907~intracellular transport	156	5.28814	1.08982e-15	CG8831, SRP14, CLBN, LT, PNUTS, KAP-ALPHA3, SRP68, KAP-ALPHA1, CG8004, GOS28, SYX13, SRP19, SYX16, RAS85D, JAGN, HTH, PORIN, CHC, HRS, NUP133, EXD, GOLGIN84, MYO10A, SYD, EX, SQD, SEC61ALPHA, MADM, SEC61BETA, SRP54K, KDELR, COLT, EDL, SNAP, SYX1A, CPB, SRP72, MRPL45, P115, SH3PX1, G, SNX6, FS(2)KET, KEL, CG8176, RAB5, CORA, CG9393, MAGO, RAB9, MIRO, GTP-BP, RAB7, GFR, GARZ, TIM9B, TIM9A, S, SAR1,…	2266	313	7937	1.74573	3.55493e-12	8.88178e-14	2.0095e-12
GOTERM_BP_FAT	GO:0070727~cellular macromolecule localization	123	4.16949	5.65758e-13	CG8831, CHIC, SRP14, CLBN, STAU, LT, PNUTS, KAP-ALPHA3, SRP68, KAP-ALPHA1, TM1, CG8004, GOS28, SYX13, SRP19, SYX16, RAS85D, HTH, CHC, HRS, SPN-B, EXD, SPN-A, MYO10A, SQD, SPN-D, SEC61ALPHA, SPN-E, SEC61BETA, SRP54K, SNAP, SYX1A, SRP72, MRPL45, P115, SH3PX1, G, SNX6, FS(2)KET, CG8176, RAB6, CORA, MAGO, CG9393, GTP-BP, TIM9B, EGL, TIM9A, RAC2, S, ROE1, SAR1, SEC23, SEC24, EMB, SPINDLY, RANBP16, GGA…	2266	244	7937	1.76568	1.81159e-09	3.0705e-11	1.02616e-09
GOTERM_BP_FAT	GO:0034613~cellular protein localization	92	3.11864	1.7249e-10	SRP14, CG8831, HH, CLBN, LT, PNUTS, KAP-ALPHA3, RB, SRP68, KAP-ALPHA1, SLH, SYX5, L(2)GD1, CG8004, EXP6, GOS28, SRP19, SYX13, MBO, SYX16, RAS85D, PARP, RANBP21, RANBP9, HTH, MSK, PARG, CG7394, SRPRBETA, CG9240, HRS, CHC, ERF1, EXD, MYO10A, DHC64C, HSP60, SEC61ALPHA, TIM8, CLC, SEC61BETA, GAMMASNAP, SCAP, SRP54K, CG8860, LIS-1, DOR, SNAP, SYX1A, SRP72, P115, MRPL45, SRP9, KRT95D, NXT1, SH3PX1, G, …	2266	179	7937	1.80024	5.52312e-07	6.34841e-09	3.12851e-07
GOTERM_BP_FAT	GO:0006886~intracellular protein transport	89	3.01695	4.88467e-10	SRP14, CG8831, HH, CLBN, LT, PNUTS, KAP-ALPHA3, RB, SRP68, KAP-ALPHA1, SLH, SYX5, L(2)GD1, CG8004, EXP6, GOS28, SRP19, SYX13, MBO, SYX16, RAS85D, RANBP21, RANBP9, HTH, MSK, CG7394, SRPRBETA, CG9240, HRS, CHC, ERF1, EXD, MYO10A, DHC64C, HSP60, SEC61ALPHA, TIM8, CLC, SEC61BETA, GAMMASNAP, SCAP, SRP54K, CG8860, LIS-1, DOR, SNAP, SYX1A, SRP72, P115, MRPL45, SRP9, KRT95D, NXT1, SH3PX1, G, SNX6, FS(2)K…	2266	174	7937	1.79158	1.56407e-06	1.64639e-08	8.85951e-07
GOTERM_BP_FAT	GO:0006913~nucleocytoplasmic transport	43	1.45763	1.10276e-07	NXT1, CG8831, HH, CLBN, FS(2)KET, KAP-ALPHA3, KAP-ALPHA1, EXP6, MAGO, MBO, RANBP21, RAS85D, RANBP9, NUP214, HTH, MSK, SMT3, EMB, RANGAP, NMD3, THO2, NUP58, RANBP16, HEL25E, NUP133, NUP154, EXD, LWR, NXF2, E(Y)2, SQD, HPR1, SBR, PHAX, KARYBETA3, EDL, PLL, MAPMODULIN, THOC7, NTF-2, THOC5, MTOR, RANBP11	2266	72	7937	2.09186	0.00035304	2.59634e-06	0.000200011
GOTERM_BP_FAT	GO:0051169~nuclear transport	43	1.45763	1.10276e-07	NXT1, CG8831, HH, CLBN, FS(2)KET, KAP-ALPHA3, KAP-ALPHA1, EXP6, MAGO, MBO, RANBP21, RAS85D, RANBP9, NUP214, HTH, MSK, SMT3, EMB, RANGAP, NMD3, THO2, NUP58, RANBP16, HEL25E, NUP133, NUP154, EXD, LWR, NXF2, E(Y)2, SQD, HPR1, SBR, PHAX, KARYBETA3, EDL, PLL, MAPMODULIN, THOC7, NTF-2, THOC5, MTOR, RANBP11	2266	72	7937	2.09186	0.00035304	2.59634e-06	0.000200011
GOTERM_BP_FAT	GO:0033365~protein localization in organelle	49	1.66102	9.08311e-07	SRP14, HH, KAP-ALPHA3, SRP68, KAP-ALPHA1, EXP6, CG8004, SRP19, MBO, RANBP21, PARP, RAS85D, RANBP9, MSK, HTH, PARG, CG7394, SRPRBETA, CG9240, EXD, HSP60, SEC61ALPHA, TIM8, SEC61BETA, CG8860, SRP54K, SCAP, SRP72, SRP9, KRT95D, FS(2)KET, CG9393, GTP-BP, TIM9B, NUP214, TIM9A, S, SMT3, SEC61GAMMA, ROE1, EMB, RANBP16, LWR, KARYBETA3, PLL, TIM10, MTOR, NTF-2, RANBP11	2266	91	7937	1.88604	0.00290419	1.86435e-05	0.00164743
GOTERM_BP_FAT	GO:0006605~protein targeting	56	1.89831	9.74472e-07	CG8831, SRP14, CLBN, HH, KAP-ALPHA3, PNUTS, SRP68, KAP-ALPHA1, SLH, EXP6, CG8004, SRP19, MBO, RANBP21, RAS85D, RANBP9, HTH, MSK, CG7394, SRPRBETA, CG9240, ERF1, EXD, HSP60, SEC61ALPHA, TIM8, SEC61BETA, SCAP, CG8860, SRP54K, DOR, SRP72, SRP9, KRT95D, NXT1, FS(2)KET, CORA, CG9393, GTP-BP, TIM9B, NUP214, TIM9A, S, SEC61GAMMA, SMT3, ROE1, EMB, RANBP16, LWR, HKL, KARYBETA3, PLL, TIM10, MTOR, NTF-2, RA…	2266	109	7937	1.79953	0.0031154	1.97483e-05	0.00176742
GOTERM_BP_FAT	GO:0034504~protein localization in nucleus	24	0.813559	3.76844e-05	RANBP16, HH, EXD, FS(2)KET, KAP-ALPHA3, LWR, KAP-ALPHA1, EXP6, MBO, RAS85D, RANBP21, PARP, KARYBETA3, RANBP9, NUP214, PLL, HTH, MSK, SMT3, PARG, MTOR, EMB, NTF-2, RANBP11	2266	38	7937	2.2122	0.113672	0.0004924	0.0683277
GOTERM_BP_FAT	GO:0006606~protein import into nucleus	22	0.745763	0.00017293	RANBP16, HH, EXD, FS(2)KET, KAP-ALPHA3, LWR, KAP-ALPHA1, EXP6, MBO, RAS85D, RANBP21, KARYBETA3, RANBP9, NUP214, PLL, HTH, MSK, SMT3, MTOR, NTF-2, EMB, RANBP11	2266	36	7937	2.14051	0.425221	0.00188822	0.313186
GOTERM_BP_FAT	GO:0051170~nuclear import	22	0.745763	0.000293054	RANBP16, HH, EXD, FS(2)KET, KAP-ALPHA3, LWR, KAP-ALPHA1, EXP6, MBO, RAS85D, RANBP21, KARYBETA3, RANBP9, NUP214, PLL, HTH, MSK, SMT3, MTOR, NTF-2, EMB, RANBP11	2266	37	7937	2.08266	0.608785	0.00304243	0.530192
GOTERM_BP_FAT	GO:0017038~protein import	32	1.08475	0.00343882	HH, FS(2)KET, KAP-ALPHA3, KAP-ALPHA1, CG8004, EXP6, CG9393, MBO, RANBP21, RAS85D, NUP214, TIM9B, RANBP9, TIM9A, MSK, HTH, SMT3, ROE1, CG7394, EMB, CG9240, RANBP16, EXD, LWR, HSP60, TIM8, KARYBETA3, PLL, TIM10, NTF-2, MTOR, RANBP11	2266	70	7937	1.60121	0.999984	0.027538	6.05669
GOTERM_MF_FAT	GO:0008565~protein transporter activity	30	1.01695	0.00740428	G, FS(2)KET, KAP-ALPHA3, RB, KAP-ALPHA1, EXP6, RANBP21, TIM9B, RANBP9, TIM9A, MSK, SEC61GAMMA, CG7394, EMB, RANBP16, SEC61ALPHA, TIM8, OR, SEC61BETA, CG8860, COG3, LDLCP, KARYBETA3, TIM10, MGE, TANGO1, NTF-2, MRPL45, P115, RANBP11	2237	68	7918	1.56157	0.999965	0.124705	11.5061
GOTERM_BP_FAT	GO:0000059~protein import into nucleus, docking	9	0.305085	0.0812172	RANBP16, RANBP21, RANBP9, NUP214, FS(2)KET, MSK, EXP6, EMB, RANBP11	2266	17	7937	1.85434	1	0.396542	78.4832
Annotation Cluster 15	Enrichment Score: 7.965359663699619
Category	Term	Count	%	PValue	Genes	List Total	Pop Hits	Pop Total	Fold Enrichment	Bonferroni	Benjamini	FDR
GOTERM_MF_FAT	GO:0004674~protein serine/threonine kinase activity	105	3.55932	2.22675e-12	TLK, LOK, MEI-41, S6KII, CG7207, CG8485, ILK, EIP63E, JIL-1, ROK, PKA-R1, GEK, MNB, SAK, CG7766, MADM, GWL, IRD5, PAR-1, CKS30A, NEK2, MPK2, PAK, KEY, MYT1, PKA-C1, IRBP, FU, STRN-MLCK, P38B, CG7597, POLO, DYRK3, CG7028, SAX, PK17E, LIC, KP78A, TAF1, GPRK1, KP78B, GISH, TKV, SMG1, PK61C, MEKK1, CKIALPHA, LKB1, CKIIBETA, MKK4, PHL, NAK, SNF4AGAMMA, KSR, L(1)G0148, DOA, CKIIALPHA, PINK1, PKD, MBT, …	2237	203	7918	1.83081	3.07295e-09	2.36381e-10	3.66255e-09
GOTERM_MF_FAT	GO:0004672~protein kinase activity	129	4.37288	4.24228e-10	PVR, TLK, LOK, SHF, MEI-41, CG7156, S6KII, CG7207, CG8726, CG8485, ILK, EIP63E, JIL-1, ROK, PKA-R1, EGFR, RET, GEK, MNB, SAK, MADM, CG7766, CG7616, GWL, EPH, IRD5, PAR-1, OTK, CKS30A, MPK2, NEK2, PAK, FAK56D, SHARK, KEY, MYT1, PKA-C1, IRBP, FU, STRN-MLCK, P38B, INR, CG7597, FJ, DYRK3, POLO, SAX, CG7028, PK17E, LIC, KP78A, TAF1, GPRK1, FPS85D, KP78B, TKV, GISH, SMG1, PR2, PK61C, MEKK1, LKB1, CKIAL…	2237	283	7918	1.61344	5.85434e-07	3.25241e-08	6.9776e-07
GOTERM_BP_FAT	GO:0006468~protein amino acid phosphorylation	119	4.0339	2.4271e-09	PVR, TLK, LOK, CG7156, S6KII, CG8726, CG8485, ILK, EIP63E, JIL-1, ROK, EGFR, PI3K21B, RET, GEK, MNB, SAK, MADM, GWL, EPH, IRD5, PAR-1, OTK, CG9886, CKS30A, MPK2, NEK2, PAK, FAK56D, SHARK, MYT1, PKA-C1, FU, STRN-MLCK, P38B, INR, CG7597, DYRK3, POLO, SAX, CG7028, PK17E, LIC, KP78A, GPRK1, FPS85D, KP78B, TKV, GISH, SMG1, PR2, PK61C, MEKK1, LKB1, CKIALPHA, CKIIBETA, MKK4, PHL, NAK, SNF4AGAMMA, KSR, L…	2266	259	7937	1.60932	7.77155e-06	7.26316e-08	4.40213e-06
GOTERM_BP_FAT	GO:0006796~phosphate metabolic process	210	7.11864	5.0134e-07	PVR, TLK, CG7580, CG7995, CG8726, CG8485, ILK, PPD3, EIP63E, ROK, PGK, L(3)NEO18, PI3K21B, COVA, PP1-87B, GEK, MNB, SAK, IPK1, PEZ, IPK2, RFESP, GWL, PTP4E, ND75, EPH, PAR-1, SK1, OTK, CG9886, SK2, NEK2, SBF, FAK56D, MYT1, PKA-C1, FU, STRN-MLCK, P38B, INR, NURF-38, CG7598, CG7597, POLO, SAX, CYPE, LIC, CG9603, KP78A, CG9306, GPRK1, KP78B, TKV, PYK, GISH, MKP3, PTPMEG, LKB1, CKIALPHA, CKIIBETA, PH…	2266	551	7937	1.33495	0.001604	1.07019e-05	0.000909296
GOTERM_BP_FAT	GO:0006793~phosphorus metabolic process	210	7.11864	5.0134e-07	PVR, TLK, CG7580, CG7995, CG8726, CG8485, ILK, PPD3, EIP63E, ROK, PGK, L(3)NEO18, PI3K21B, COVA, PP1-87B, GEK, MNB, SAK, IPK1, PEZ, IPK2, RFESP, GWL, PTP4E, ND75, EPH, PAR-1, SK1, OTK, CG9886, SK2, NEK2, SBF, FAK56D, MYT1, PKA-C1, FU, STRN-MLCK, P38B, INR, NURF-38, CG7598, CG7597, POLO, SAX, CYPE, LIC, CG9603, KP78A, CG9306, GPRK1, KP78B, TKV, PYK, GISH, MKP3, PTPMEG, LKB1, CKIALPHA, CKIIBETA, PH…	2266	551	7937	1.33495	0.001604	1.07019e-05	0.000909296
GOTERM_BP_FAT	GO:0016310~phosphorylation	165	5.59322	2.8004e-06	PVR, TLK, LOK, CG7580, MEI-41, CG7156, S6KII, CG8726, CG8485, ILK, EIP63E, JIL-1, ROK, PGK, L(3)NEO18, EGFR, COVA, PI3K21B, RET, PI4KIIALPHA, GEK, MNB, SAK, MADM, IPK1, IPK2, RFESP, GWL, CG7712, ND75, EPH, IRD5, PAR-1, SK1, ND23, OTK, CG9886, SK2, CKS30A, MPK2, NEK2, FAK56D, PAK, SHARK, MYT1, LEVY, PKA-C1, FU, STRN-MLCK, P38B, CG7598, INR, CG7597, DYRK3, POLO, SAX, CG7028, CYPE, LIC, CG9603, PK17…	2266	425	7937	1.35985	0.0089268	5.09469e-05	0.00507907
Annotation Cluster 16	Enrichment Score: 7.308475323529875
Category	Term	Count	%	PValue	Genes	List Total	Pop Hits	Pop Total	Fold Enrichment	Bonferroni	Benjamini	FDR
GOTERM_BP_FAT	GO:0032268~regulation of cellular protein metabolic process	71	2.40678	9.21148e-10	SRP14, HH, CG6966, STAU, PNUTS, RB, EIF-5A, RTF1, OKR, NIPP1, PARG, CYCE, MRPL39, GCN2, ROK, PKA-R1, EIF3-S9, LK6, HEP, EIF-4E, SPN-B, SLIK, PABP, FMR1, SQD, SLPR, PR-SET7, LIS-1, DP1, EFSEC, SRP9, SXL, FS(1)K10, PEK, NEDD8, RM62, MRPL11, CG7414, SPN27A, HRB27C, SPN4, CG9596, CUP, PAIP2, EIF3-S10, DDX1, DNAPOL-GAMMA35, IRP-1B, IRP-1A, SU(VAR)205, I-2, RAPTOR, RPB4, MUS301, GLO, PPP4R2R, CHIP, MKK…	2266	130	7937	1.91298	2.94951e-06	2.92031e-08	1.67072e-06
GOTERM_BP_FAT	GO:0010608~posttranscriptional regulation of gene expression	69	2.33898	1.41003e-09	SRP14, STAU, PCM, EIF-5A, SHF, PTEN, CG7843, OKR, MRPL39, GCN2, EIF3-S9, LK6, EIF-4E, SPN-B, PABP, FMR1, SQD, COS, SPN-E, RIC8A, LIS-1, DP1, EFSEC, CSN1B, SRP9, SXL, DCR-1, FS(1)K10, PEK, HSC70-4, PASHA, NEDD8, HSC70-3, DCR-2, RM62, DROSHA, MRPL11, FU, CG7414, TIS11, HRB27C, CG9596, CUP, SMG6, PAIP2, SMG5, EIF3-S10, LOQS, IRP-1B, DNAPOL-GAMMA35, DDX1, SMG1, IRP-1A, GW, MUS301, CSN8, GLO, CSN7, CS…	2266	126	7937	1.91812	4.51492e-06	4.38343e-08	2.55744e-06
GOTERM_BP_FAT	GO:0006417~regulation of translation	37	1.25424	9.14144e-05	SRP14, FS(1)K10, PEK, STAU, EIF-5A, RM62, MRPL11, CG7414, OKR, MRPL39, GCN2, HRB27C, EIF3-S9, LK6, CG9596, CUP, EIF-4E, SPN-B, PAIP2, PABP, EIF3-S10, FMR1, IRP-1B, DDX1, DNAPOL-GAMMA35, IRP-1A, SQD, MUS301, GLO, LIS-1, DP1, PUM, EFSEC, EIF-3P66, EXBA, SRP9, SXL	2266	72	7937	1.79997	0.253771	0.00108357	0.165672
Annotation Cluster 17	Enrichment Score: 7.07037599266965
Category	Term	Count	%	PValue	Genes	List Total	Pop Hits	Pop Total	Fold Enrichment	Bonferroni	Benjamini	FDR
GOTERM_BP_FAT	GO:0016192~vesicle-mediated transport	183	6.20339	7.00403e-15	SYX17, PAT1, ROP, CYP33, SYX18, LT, EPS-15, PNUTS, LIPRIN-ALPHA, SHI, GDI, GOS28, DRPR, SYX13, SYX16, FZY, LPR1, JAGN, MED26, SCAMP, RPS27A, INT6, L(2)GL, CHC, HRS, IP259, PP1-87B, CG7362, SYB, GOLGIN84, SYD, JRA, EX, GEL, MADM, CG9527, KDELR, MIB1, COLT, T-CP1, PAR-6, PSIDIN, SNAP, MNT, CPA, SYX1A, TEPIII, L(3)01239, P115, RAB11, CG9132, KEN, PALL, G, CG8176, RAB6, RAB5, LQF, RAB4, RAB9, PAST1, …	2266	391	7937	1.63935	2.23961e-11	4.76508e-13	1.26898e-11
GOTERM_BP_FAT	GO:0016044~membrane organization	142	4.81356	8.5291e-10	PAT1, CYP33, EPS-15, PNUTS, SHI, DRPR, FZY, LPR1, MED26, RPS27A, INT6, CHC, HRS, PP1-87B, IP259, CG7362, JRA, GEL, CG9527, COLT, MIB1, T-CP1, PAR-6, PSIDIN, SNAP, MNT, CPA, SYX1A, TEPIII, PELO, L(3)01239, P115, RAB11, CG9132, KEN, PALL, OTE, RAB5, LQF, RAB4, PAST1, RAB7, GARZ, SU(DX), TIM9B, TIM9A, RAC2, FLFL, CG7597, RAC1, LAMC, L(1)G0269, POLO, SCAR, SCB, MER, GAMMACOP, RHO1, CG7593, HLH106, SS…	2266	319	7937	1.55917	2.73101e-06	2.73102e-08	1.54696e-06
GOTERM_BP_FAT	GO:0006897~endocytosis	111	3.76271	6.05445e-07	PAT1, CYP33, EPS-15, PNUTS, SHI, DRPR, FZY, LPR1, MED26, INT6, RPS27A, CHC, HRS, PP1-87B, IP259, CG7362, JRA, GEL, CG9527, COLT, MIB1, T-CP1, PAR-6, PSIDIN, SNAP, CPA, MNT, TEPIII, L(3)01239, RAB11, CG9132, KEN, PALL, RAB5, LQF, RAB4, PAST1, RAB7, SU(DX), GARZ, RAC2, FLFL, CG7597, RAC1, POLO, SCAR, SCB, MER, GAMMACOP, RHO1, CG7593, HLH106, SSE, OR, MTS, HR38, GT, NUP62, CKIALPHA, LAP, NEDD4, NIPP…	2266	258	7937	1.50695	0.00193676	1.26708e-05	0.00109811
GOTERM_BP_FAT	GO:0010324~membrane invagination	111	3.76271	6.05445e-07	PAT1, CYP33, EPS-15, PNUTS, SHI, DRPR, FZY, LPR1, MED26, INT6, RPS27A, CHC, HRS, PP1-87B, IP259, CG7362, JRA, GEL, CG9527, COLT, MIB1, T-CP1, PAR-6, PSIDIN, SNAP, CPA, MNT, TEPIII, L(3)01239, RAB11, CG9132, KEN, PALL, RAB5, LQF, RAB4, PAST1, RAB7, SU(DX), GARZ, RAC2, FLFL, CG7597, RAC1, POLO, SCAR, SCB, MER, GAMMACOP, RHO1, CG7593, HLH106, SSE, OR, MTS, HR38, GT, NUP62, CKIALPHA, LAP, NEDD4, NIPP…	2266	258	7937	1.50695	0.00193676	1.26708e-05	0.00109811
GOTERM_BP_FAT	GO:0006911~phagocytosis, engulfment	77	2.61017	0.000216052	PAT1, CYP33, CRQ, PNUTS, SLH, SYX5, DMAP1, CKA, FZY, MED26, PI3K68D, PARG, MTA1-LIKE, INT6, RPS27A, HEM, NCM, PP1-87B, IP259, CG7362, CHES-1-LIKE, SRA-1, GIG, JRA, MCR, GEL, RAS, CG9527, COLT, T-CP1, PAR-6, PSIDIN, P16-ARC, RPL40, SNAP, CPA, MNT, TEPIII, L(3)01239, SMR, CG9779, KEN, PALL, NUP98, CG7367, L(2)37CD, GARZ, CHI, CG7275, RAC2, FLFL, CG7597, RAC1, SMT3, POLO, SCAR, SCB, S6K, EIF-1A, PDH…	2266	187	7937	1.44227	0.499363	0.00229595	0.391138
GOTERM_BP_FAT	GO:0006909~phagocytosis	78	2.64407	0.000799436	PAT1, CYP33, CRQ, PNUTS, SLH, SYX5, DMAP1, DRPR, CKA, FZY, MED26, PI3K68D, PARG, MTA1-LIKE, INT6, RPS27A, HEM, NCM, PP1-87B, IP259, CG7362, CHES-1-LIKE, SRA-1, GIG, JRA, MCR, GEL, RAS, CG9527, COLT, T-CP1, PAR-6, PSIDIN, P16-ARC, RPL40, SNAP, CPA, MNT, TEPIII, L(3)01239, SMR, CG9779, KEN, PALL, NUP98, CG7367, L(2)37CD, GARZ, CHI, CG7275, RAC2, FLFL, CG7597, RAC1, SMT3, POLO, SCAR, SCB, S6K, EIF-1…	2266	197	7937	1.38684	0.922758	0.00745981	1.44008
Annotation Cluster 18	Enrichment Score: 6.583352059049373
Category	Term	Count	%	PValue	Genes	List Total	Pop Hits	Pop Total	Fold Enrichment	Bonferroni	Benjamini	FDR
GOTERM_BP_FAT	GO:0051726~regulation of cell cycle	97	3.28814	1.61043e-15	TLK, LOK, IDA, SLD5, MEI-41, RPN9, DM, FZY, SIN3A, ROD, SMOX, L(2)GL, EGFR, COVA, KLP3A, CHB, CROL, SPN-A, EX, MR, MRE11, MAD2, MNT, SLMB, INVADOLYSIN, RECQ5, DUP, CKS30A, NEK2, PUF68, RECQ4, N, MYT1, PPV, SAV, SKPA, SU(H), SPINDLY, SUUR, TAF1, PSF2, RCA1, PSF1, GLUT1, RBF2, SNF4AGAMMA, HH, GRIP71, FEO, FWS, PTEN, GEMININ, KAY, MAT89BB, L(3)MBT, TEFU, CYCA, DREF, CYCE, DALLY, MYB, DLG1, GIG, DHC6…	2266	166	7937	2.04673	5.3324e-12	1.2701e-13	3.01981e-12
GOTERM_BP_FAT	GO:0007346~regulation of mitotic cell cycle	58	1.9661	7.01442e-10	HH, FEO, SLD5, MEI-41, RPN9, MAT89BB, FZY, L(3)MBT, SIN3A, ROD, CYCA, CYCE, SMOX, MYB, EGFR, CHB, KLP3A, CROL, DHC64C, EX, PTC, RAP, GRP, SMO, MAD2, LIS-1, SLMB, SMR, INVADOLYSIN, RBF, RECQ5, PP4-19C, CKS30A, NEK2, RECQ4, N, PUC, MYT1, DGT5, DGT6, SKPA, SU(H), SWM, DGT3, DGT4, MARS, SPINDLY, SC, MIT(1)15, MAD, MUS304, NEJ, CI, PSF2, PSF1, RCA1, SOS, RUX	2266	98	7937	2.073	2.24601e-06	2.31548e-08	1.27223e-06
GOTERM_BP_FAT	GO:0033043~regulation of organelle organization	58	1.9661	1.29742e-07	MOD(MDG4), DSH, NOD, FEO, PINK1, SHI, MOE, FWS, MEI-41, CP190, ROD, PARK, CYCA, RTF1, PARG, MYB, ROK, KLP3A, CHB, SQH, DHC64C, GEK, SPAS, DRE4, PR-SET7, TACC, MAD2, P16-ARC, CPA, FWD, STI, SLMB, CPB, INVADOLYSIN, SHOT, CKS30A, NEK2, FZ, DGT5, DGT6, SKPA, DGT3, DGT4, SSH, SPINDLY, SSRP, MIT(1)15, SU(VAR)205, PLD, NEJ, RPB4, RCA1, SOP2, SIR2, PCAF, ENA, HCF, RUX	2266	109	7937	1.86379	0.000415346	2.98872e-06	0.000235317
GOTERM_BP_FAT	GO:0010564~regulation of cell cycle process	44	1.49153	9.15991e-06	CKS30A, NEK2, RECQ4, FEO, N, FWS, PUC, SLD5, MEI-41, RPN9, FZY, ROD, CYCA, DGT5, DGT6, CYCE, MYB, SKPA, SU(H), DGT3, DGT4, SPINDLY, EGFR, MIT(1)15, SUUR, MAD, KLP3A, CHB, DHC64C, EX, RAP, NEJ, PSF2, CI, PSF1, RCA1, SMO, MAD2, SOS, FWD, SLMB, RUX, INVADOLYSIN, RBF	2266	84	7937	1.83472	0.0289042	0.000141001	0.0166124
GOTERM_BP_FAT	GO:0051783~regulation of nuclear division	20	0.677966	0.0153459	SPINDLY, MIT(1)15, KLP3A, CKS30A, NEK2, DHC64C, NEJ, MEI-41, RCA1, MAD2, ROD, CYCA, DGT5, SLMB, DGT6, RUX, MYB, INVADOLYSIN, DGT3, DGT4	2266	42	7937	1.66793	1	0.104864	24.4588
GOTERM_BP_FAT	GO:0007088~regulation of mitosis	20	0.677966	0.0153459	SPINDLY, MIT(1)15, KLP3A, CKS30A, NEK2, DHC64C, NEJ, MEI-41, RCA1, MAD2, ROD, CYCA, DGT5, SLMB, DGT6, RUX, MYB, INVADOLYSIN, DGT3, DGT4	2266	42	7937	1.66793	1	0.104864	24.4588
Annotation Cluster 19	Enrichment Score: 6.550738373416842
Category	Term	Count	%	PValue	Genes	List Total	Pop Hits	Pop Total	Fold Enrichment	Bonferroni	Benjamini	FDR
GOTERM_BP_FAT	GO:0040007~growth	64	2.16949	2.1727e-10	PDP1, HH, DSH, CNO, MMP1, RAS85D, DAW, CYCD, JAGN, DAP160, MAV, DG, HEP, RAW, HEM, LIMK1, SPAG, EIF-4A, PATH, SLIF, SLPR, DOK, CHICO, TIMP, SNAP, POE, JING, NRG, SXL, SU(VAR)2-10, FZ, SHARK, N, HR4, E2F, PIX, PI3K92E, RPL30, DPP, FT, MRPL12, RAC2, DCO, INR, RAC1, FJ, GBB, S6K, SGG, HYD, FPS85D, NF1, MLE, SPIN, PYGO, PTPMEG, CUE, FZ2, DBO, RUT, SFMBT, MTL, RHEB, CSUL	2266	110	7937	2.0379	6.95698e-07	7.81684e-09	3.94071e-07
GOTERM_BP_FAT	GO:0048589~developmental growth	48	1.62712	1.41482e-08	HH, DSH, SU(VAR)2-10, FZ, SHARK, N, CNO, MMP1, RAS85D, DPP, FT, RAC2, JAGN, DCO, INR, RAC1, DAP160, FJ, DG, HEP, SGG, RAW, HEM, HYD, LIMK1, FPS85D, NF1, EIF-4A, SPAG, MLE, SPIN, PYGO, PTPMEG, CUE, FZ2, SLPR, DOK, CHICO, TIMP, SNAP, RUT, SFMBT, RHEB, MTL, POE, JING, NRG, SXL	2266	80	7937	2.10159	4.53017e-05	3.80695e-07	2.56612e-05
GOTERM_BP_FAT	GO:0008361~regulation of cell size	45	1.52542	4.34542e-08	LILLI, TCTP, DSH, FZ, SHARK, CNO, CIC, PTEN, PIX, RAS85D, DM, PI3K92E, MRPL12, RAC2, CYCD, JAGN, DCO, INR, RAC1, ORCT2, S6K, PI3K21B, HEP, RAW, HEM, EIF-4E, FOXO, FPS85D, NF1, MLE, GIG, PK61C, PTPMEG, CUE, SLPR, FZ2, DOK, CHICO, DBO, RUT, MNT, MTL, RHEB, POE, NRG	2266	75	7937	2.10159	0.000139131	1.08703e-06	7.88146e-05
GOTERM_BP_FAT	GO:0016049~cell growth	31	1.05085	9.46707e-07	DSH, FZ, SHARK, CNO, PIX, RAS85D, PI3K92E, MRPL12, RAC2, CYCD, JAGN, INR, RAC1, HEP, RAW, HEM, NF1, FPS85D, MLE, PTPMEG, CUE, SLPR, FZ2, DOK, CHICO, DBO, RUT, MTL, RHEB, POE, NRG	2266	48	7937	2.26213	0.00302677	1.93078e-05	0.00171707
GOTERM_BP_FAT	GO:0032535~regulation of cellular component size	52	1.76271	1.07602e-06	LILLI, DSH, CNO, PTEN, DM, RAS85D, CYCD, JAGN, ORCT2, HEP, PI3K21B, RAW, HEM, EIF-4E, GIG, GEK, SLPR, DOK, CHICO, P16-ARC, MNT, CPA, CPB, POE, NRG, TCTP, FZ, SHARK, CIC, PIX, PI3K92E, MRPL12, RAC2, DCO, INR, RAC1, S6K, SSH, FOXO, NF1, FPS85D, MLE, PK61C, PTPMEG, CUE, FZ2, DBO, RUT, SOP2, MTL, RHEB, ENA	2266	99	7937	1.83977	0.00343949	2.15336e-05	0.0019516
GOTERM_BP_FAT	GO:0048588~developmental cell growth	17	0.576271	0.00364586	HEP, HEM, DSH, NF1, FZ, MLE, PTPMEG, CUE, FZ2, RAS85D, CHICO, JAGN, INR, RAC1, RUT, POE, NRG	2266	30	7937	1.98483	0.999992	0.0290297	6.41006
Annotation Cluster 20	Enrichment Score: 6.173420805834731
Category	Term	Count	%	PValue	Genes	List Total	Pop Hits	Pop Total	Fold Enrichment	Bonferroni	Benjamini	FDR
GOTERM_BP_FAT	GO:0007163~establishment or maintenance of cell polarity	66	2.23729	9.49038e-12	DSH, NOD, MOE, CNO, SYX7, SHG, KAY, RAS85D, DS, MSK, STAN, LOCO, DG, ROK, L(2)GL, DLG1, EGFR, CSW, STY, JRA, SQD, SPEN, PATJ, KRN, DGO, RIC8A, SDT, PAR-6, LAP1, TAK1, FRTZ, KHC-73, CG6982, NRX-IV, SDS22, FZ, RAB5, SHARK, N, CORA, RDX, MIRR, PUC, FZ4, PYD, RIN, FT, DCO, RAC1, NMO, FJ, EGH, G-IALPHA65A, SCA, RHO1, CONT, SN, NEJ, FZ2, FZ3, CRB, LKB1, CNI, RAPS, PHL, SNF1A	2266	109	7937	2.12087	3.03883e-08	4.22059e-10	1.72131e-08
GOTERM_BP_FAT	GO:0001738~morphogenesis of a polarized epithelium	42	1.42373	1.33514e-07	DLT, FRTZ, DSH, FZ, SHI, RDX, N, CNO, MIRR, PUC, KAY, SHG, RIN, FT, DCO, DS, MSK, RAC1, NMO, FJ, STAN, MSN, ROK, L(2)GL, DLG1, EGFR, HEP, SCA, LIMK1, RHO1, SQH, STY, JRA, PATJ, NEJ, DGO, KRN, CRB, SDT, PAR-6, TOM, TAK1	2266	70	7937	2.10159	0.000427419	3.05364e-06	0.000242159
GOTERM_BP_FAT	GO:0001736~establishment of planar polarity	35	1.18644	7.25965e-06	FRTZ, DSH, FZ, RDX, N, CNO, MIRR, PUC, KAY, SHG, RIN, FT, DCO, DS, MSK, RAC1, NMO, STAN, FJ, MSN, ROK, EGFR, HEP, SCA, LIMK1, RHO1, SQH, STY, JRA, PATJ, NEJ, DGO, KRN, TOM, TAK1	2266	61	7937	2.00972	0.0229774	0.00011799	0.0131663
GOTERM_BP_FAT	GO:0007164~establishment of tissue polarity	35	1.18644	1.17015e-05	FRTZ, DSH, FZ, RDX, N, CNO, MIRR, PUC, KAY, SHG, RIN, FT, DCO, DS, MSK, RAC1, NMO, STAN, FJ, MSN, ROK, EGFR, HEP, SCA, LIMK1, RHO1, SQH, STY, JRA, PATJ, NEJ, DGO, KRN, TOM, TAK1	2266	62	7937	1.9773	0.0367752	0.000175893	0.0212214
GOTERM_BP_FAT	GO:0042067~establishment of ommatidial polarity	28	0.949153	1.77621e-05	DSH, FZ, RDX, N, MIRR, CNO, PUC, KAY, SHG, RIN, FT, DCO, DS, MSK, RAC1, NMO, STAN, FJ, ROK, EGFR, SCA, RHO1, STY, JRA, NEJ, KRN, DGO, TAK1	2266	46	7937	2.13205	0.0552877	0.000251627	0.032211
GOTERM_BP_FAT	GO:0016318~ommatidial rotation	18	0.610169	4.76446e-05	EGFR, DSH, SCA, RHO1, STY, FZ, CNO, PUC, KRN, SHG, FT, RIN, DS, MSK, NMO, STAN, ROK, TAK1	2266	25	7937	2.52191	0.141494	0.000607631	0.0863796
Annotation Cluster 21	Enrichment Score: 6.065049235310834
Category	Term	Count	%	PValue	Genes	List Total	Pop Hits	Pop Total	Fold Enrichment	Bonferroni	Benjamini	FDR
GOTERM_MF_FAT	GO:0008135~translation factor activity, nucleic acid binding	46	1.55932	5.19383e-07	EIF6, EIF5, RBP2, EIF5B, EIF4AIII, EIF-5A, EIF2B-BETA, CG8443, EIF2B-GAMMA, CG8636, EIF-2BETA, EFTUM, CG7414, EIF-2ALPHA, TFIIB, EIF3-S8, EF1GAMMA, INT6, EIF3-S9, CG9769, EIF-1A, CG9596, SU(VAR)3-9, ERF1, EIF-4E, EF1BETA, TFIIS, EIF3-S10, EIF-4B, EIF-4A, EIF2B-DELTA, EIF2B-EPSILON, EF2B, TANGO7, ELF, EIF-3P40, EIF2B-ALPHA, EIF4G, EF1ALPHA48D, HBS1, MRPL49, EFSEC, EIF-3P66, LIGATIN, CG9099, EEF1DE…	2237	83	7918	1.96168	0.000716492	2.47152e-05	0.000854265
GOTERM_BP_FAT	GO:0006413~translational initiation	34	1.15254	1.04544e-06	EIF6, RBP2, EIF5, EIF5B, EIF4AIII, EIF-5A, EIF2B-BETA, EIF2B-GAMMA, CG8443, CG8636, EIF-2BETA, PIX, EIF-2ALPHA, TFIIB, EIF3-S8, INT6, EIF3-S9, CG9769, EIF-1A, CG9596, SU(VAR)3-9, EIF-4E, EIF3-S10, EIF-4B, EIF-4A, EIF2B-DELTA, EIF2B-EPSILON, EIF-3P40, EIF2B-ALPHA, EIF4G, MRPL49, EIF-3P66, LIGATIN, CG9099	2266	55	7937	2.16527	0.0033419	2.10532e-05	0.00189614
GOTERM_MF_FAT	GO:0003743~translation initiation factor activity	35	1.18644	1.17508e-06	EIF6, RBP2, EIF5, EIF5B, EIF4AIII, EIF-5A, EIF2B-BETA, CG8443, EIF2B-GAMMA, CG8636, EIF-2BETA, CG7414, EIF-2ALPHA, TFIIB, EIF3-S8, INT6, EIF3-S9, CG9769, EIF-1A, CG9596, SU(VAR)3-9, EIF-4E, EIF3-S10, EIF-4B, EIF-4A, EIF2B-DELTA, EIF2B-EPSILON, TANGO7, EIF-3P40, EIF2B-ALPHA, EIF4G, MRPL49, EIF-3P66, LIGATIN, CG9099	2237	58	7918	2.13594	0.00162029	5.06739e-05	0.00193272
Annotation Cluster 22	Enrichment Score: 5.920449823769764
Category	Term	Count	%	PValue	Genes	List Total	Pop Hits	Pop Total	Fold Enrichment	Bonferroni	Benjamini	FDR
GOTERM_MF_FAT	GO:0016779~nucleotidyltransferase activity	52	1.76271	1.27364e-08	DNAPOL-IOTA, CG8207, DNAPOL-EPSILON, EIF2B-GAMMA, MED20, DNAPOL-ALPHA50, CHKOV1, PECT, RPIII128, L(1)1BI, RPII33, RS1, CG8311, PAPSS, RPII15, REV1, RPII18, SIN, TAM, CG9523, SPN-E, MKG-P, RPII140, RPII215, COQ2, DNAPOL-ETA, CG9232, ECO, DNAPOL-ALPHA73, DNAPOL-DELTA, RPI1, L(2)37CG, MRNA-CAPPING-ENZYME, POLE2, MMY, MUS205, HRG, DNAPOL-ALPHA180, DNAPOL-ALPHA60, RPI135, DNAPOL-GAMMA35, RPB8, RPB5, R…	2237	90	7918	2.04508	1.75761e-05	8.7881e-07	2.09485e-05
GOTERM_MF_FAT	GO:0003899~DNA-directed RNA polymerase activity	22	0.745763	1.16628e-05	DNAPOL-ALPHA60, RPII15, RPII18, RPI135, SIN, RPB8, RPI1, RPB5, MED20, RPB4, RPB7, DNAPOL-ALPHA50, RPII215, L(2)37CG, RPII140, COQ2, RPB11, RPB10, RPIII128, RPI12, CG7339, RPII33	2237	32	7918	2.43345	0.0159659	0.000423456	0.0191809
GOTERM_MF_FAT	GO:0034062~RNA polymerase activity	22	0.745763	1.16628e-05	DNAPOL-ALPHA60, RPII15, RPII18, RPI135, SIN, RPB8, RPI1, RPB5, MED20, RPB4, RPB7, DNAPOL-ALPHA50, RPII215, L(2)37CG, RPII140, COQ2, RPB11, RPB10, RPIII128, RPI12, CG7339, RPII33	2237	32	7918	2.43345	0.0159659	0.000423456	0.0191809
Annotation Cluster 23	Enrichment Score: 5.896575996991043
Category	Term	Count	%	PValue	Genes	List Total	Pop Hits	Pop Total	Fold Enrichment	Bonferroni	Benjamini	FDR
GOTERM_BP_FAT	GO:0010604~positive regulation of macromolecule metabolic process	73	2.47458	1.62452e-08	PDP1, TARA, STAU, ESG, OVO, TBP, EIF-5A, ISWI, ESC, PNR, DM, NC2ALPHA, SGF11, NOT, RTF1, MOR, JIL-1, RPS27A, SLIK, PABP, MRTF, DALAO, IX, NC2BETA, DSX, HSF, DP1, RPL40, MED17, SNR1, TFIIFALPHA, DEAF1, SPT5, RECQ4, SPT4, LOLAL, TNA, LIN, N, MIRR, E2F, TFAM, HYX, REL, E(Y)3, SNO, SU(H), HRB27C, LID, TAF2, SUUR, TAF1, TAF4, TGO, HB, TAF5, DIF, SOB, HLH106, DA, E(Y)2, DRM, SU(VAR)205, RAPTOR, ODD, CI…	2266	142	7937	1.80066	5.20158e-05	4.29894e-07	2.94646e-05
GOTERM_BP_FAT	GO:0009891~positive regulation of biosynthetic process	76	2.57627	5.21904e-08	PDP1, TARA, HEL89B, STAU, ESG, OVO, TBP, EIF-5A, ISWI, ESC, PNR, PARP, DM, NC2ALPHA, MYD88, SGF11, NOT, MOR, JIL-1, RPS27A, PABP, MRTF, DALAO, IX, NC2BETA, DSX, HSF, DP1, RPL40, MED17, IRD5, SNR1, IMD, TFIIFALPHA, TAK1, DEAF1, SPT5, RECQ4, SPT4, LOLAL, TNA, LIN, N, MIRR, TL, KEY, E2F, TFAM, HYX, REL, E(Y)3, SNO, SU(H), HRB27C, LID, TAF2, SUUR, TAF1, TAF4, TGO, HB, TAF5, DIF, SOB, HLH106, DA, E(Y)…	2266	153	7937	1.73988	0.0001671	1.28549e-06	9.46598e-05
GOTERM_BP_FAT	GO:0031328~positive regulation of cellular biosynthetic process	76	2.57627	5.21904e-08	PDP1, TARA, HEL89B, STAU, ESG, OVO, TBP, EIF-5A, ISWI, ESC, PNR, PARP, DM, NC2ALPHA, MYD88, SGF11, NOT, MOR, JIL-1, RPS27A, PABP, MRTF, DALAO, IX, NC2BETA, DSX, HSF, DP1, RPL40, MED17, IRD5, SNR1, IMD, TFIIFALPHA, TAK1, DEAF1, SPT5, RECQ4, SPT4, LOLAL, TNA, LIN, N, MIRR, TL, KEY, E2F, TFAM, HYX, REL, E(Y)3, SNO, SU(H), HRB27C, LID, TAF2, SUUR, TAF1, TAF4, TGO, HB, TAF5, DIF, SOB, HLH106, DA, E(Y)…	2266	153	7937	1.73988	0.0001671	1.28549e-06	9.46598e-05
GOTERM_BP_FAT	GO:0010557~positive regulation of macromolecule biosynthetic process	65	2.20339	2.84412e-07	PDP1, TARA, STAU, ESG, OVO, EIF-5A, ISWI, ESC, PNR, DM, NC2ALPHA, SGF11, NOT, MOR, JIL-1, RPS27A, PABP, MRTF, DALAO, NC2BETA, IX, DSX, HSF, DP1, RPL40, MED17, SNR1, TFIIFALPHA, DEAF1, SPT5, RECQ4, SPT4, LOLAL, TNA, LIN, N, MIRR, E2F, TFAM, HYX, REL, E(Y)3, SNO, SU(H), HRB27C, LID, SUUR, TAF1, TAF4, TGO, HB, TAF5, DIF, SOB, HLH106, DA, E(Y)2, SU(VAR)205, DRM, ODD, CI, GPP, CYC, PUM, PHO	2266	129	7937	1.7649	0.000910271	6.19512e-06	0.000515847
GOTERM_BP_FAT	GO:0045935~positive regulation of nucleobase, nucleoside, nucleotide and nucleic acid metabolic process	61	2.0678	6.8172e-07	PDP1, TARA, ESG, OVO, TBP, ISWI, ESC, PNR, DM, NC2ALPHA, SGF11, NOT, MOR, JIL-1, RPS27A, MRTF, DALAO, NC2BETA, IX, DSX, HSF, RPL40, MED17, SNR1, TFIIFALPHA, DEAF1, SPT5, RECQ4, SPT4, LOLAL, TNA, LIN, N, MIRR, E2F, TFAM, HYX, REL, SNO, E(Y)3, SU(H), LID, TAF2, TAF1, SUUR, TAF4, TGO, HB, TAF5, DIF, SOB, HLH106, DA, E(Y)2, SU(VAR)205, DRM, ODD, CI, GPP, CYC, PHO	2266	121	7937	1.7658	0.00218049	1.41744e-05	0.00123646
GOTERM_BP_FAT	GO:0051173~positive regulation of nitrogen compound metabolic process	61	2.0678	6.8172e-07	PDP1, TARA, ESG, OVO, TBP, ISWI, ESC, PNR, DM, NC2ALPHA, SGF11, NOT, MOR, JIL-1, RPS27A, MRTF, DALAO, NC2BETA, IX, DSX, HSF, RPL40, MED17, SNR1, TFIIFALPHA, DEAF1, SPT5, RECQ4, SPT4, LOLAL, TNA, LIN, N, MIRR, E2F, TFAM, HYX, REL, SNO, E(Y)3, SU(H), LID, TAF2, TAF1, SUUR, TAF4, TGO, HB, TAF5, DIF, SOB, HLH106, DA, E(Y)2, SU(VAR)205, DRM, ODD, CI, GPP, CYC, PHO	2266	121	7937	1.7658	0.00218049	1.41744e-05	0.00123646
GOTERM_BP_FAT	GO:0045941~positive regulation of transcription	57	1.9322	4.62389e-06	PDP1, TARA, ESG, OVO, ISWI, ESC, PNR, DM, NC2ALPHA, SGF11, NOT, MOR, JIL-1, RPS27A, MRTF, DALAO, NC2BETA, IX, DSX, HSF, RPL40, MED17, SNR1, TFIIFALPHA, DEAF1, SPT5, SPT4, TNA, LOLAL, LIN, N, MIRR, E2F, TFAM, HYX, REL, SNO, E(Y)3, SU(H), LID, TAF1, TAF4, TGO, HB, TAF5, DIF, SOB, HLH106, DA, E(Y)2, SU(VAR)205, DRM, ODD, CI, GPP, CYC, PHO	2266	116	7937	1.72113	0.0146967	8.09024e-05	0.00838621
GOTERM_BP_FAT	GO:0051254~positive regulation of RNA metabolic process	47	1.59322	4.75229e-06	DEAF1, PDP1, TARA, SPT5, SPT4, ESG, OVO, TNA, LOLAL, LIN, TBP, N, ESC, PNR, TFAM, NC2ALPHA, SGF11, REL, SNO, E(Y)3, NOT, MOR, JIL-1, SU(H), TAF2, TAF1, TAF4, TGO, TAF5, MRTF, DIF, SOB, DALAO, E(Y)2, SU(VAR)205, DRM, IX, NC2BETA, ODD, CI, DSX, HSF, MED17, GPP, CYC, PHO, SNR1	2266	90	7937	1.82916	0.0151017	8.2697e-05	0.00861907
GOTERM_BP_FAT	GO:0010628~positive regulation of gene expression	57	1.9322	6.43584e-06	PDP1, TARA, ESG, OVO, ISWI, ESC, PNR, DM, NC2ALPHA, SGF11, NOT, MOR, JIL-1, RPS27A, MRTF, DALAO, NC2BETA, IX, DSX, HSF, RPL40, MED17, SNR1, TFIIFALPHA, DEAF1, SPT5, SPT4, TNA, LOLAL, LIN, N, MIRR, E2F, TFAM, HYX, REL, SNO, E(Y)3, SU(H), LID, TAF1, TAF4, TGO, HB, TAF5, DIF, SOB, HLH106, DA, E(Y)2, SU(VAR)205, DRM, ODD, CI, GPP, CYC, PHO	2266	117	7937	1.70642	0.0203967	0.000106219	0.0116723
GOTERM_BP_FAT	GO:0045893~positive regulation of transcription, DNA-dependent	45	1.52542	1.57266e-05	DEAF1, PDP1, TARA, SPT5, SPT4, ESG, OVO, TNA, LOLAL, LIN, N, ESC, PNR, TFAM, NC2ALPHA, SGF11, REL, SNO, NOT, E(Y)3, MOR, JIL-1, SU(H), TAF1, TAF4, TGO, TAF5, MRTF, DIF, SOB, DALAO, E(Y)2, SU(VAR)205, DRM, IX, NC2BETA, ODD, CI, DSX, HSF, MED17, GPP, CYC, PHO, SNR1	2266	88	7937	1.79113	0.0491101	0.000226807	0.0285201
GOTERM_BP_FAT	GO:0045944~positive regulation of transcription from RNA polymerase II promoter	26	0.881356	0.00105547	SPT5, SPT4, ESG, OVO, LIN, N, NC2ALPHA, REL, SNO, SU(H), TAF1, TAF4, TGO, TAF5, DIF, SOB, E(Y)2, DRM, ODD, IX, NC2BETA, CI, DSX, HSF, MED17, CYC	2266	50	7937	1.82138	0.966	0.00966963	1.89714
Annotation Cluster 24	Enrichment Score: 5.815155129969872
Category	Term	Count	%	PValue	Genes	List Total	Pop Hits	Pop Total	Fold Enrichment	Bonferroni	Benjamini	FDR
GOTERM_BP_FAT	GO:0000165~MAPKKK cascade	31	1.05085	5.30267e-08	GADD45, MPK2, PAK, GEF26, SHARK, MBT, CNO, PUC, CKA, RL, KAY, PYD, RAC2, P38B, MSK, RAC1, SRC42A, MSN, LIC, HEP, DSOR1, RHO1, DRK, JRA, KRN, SLPR, MEKK1, MKK4, MTL, PTP-ER, TAK1	2266	44	7937	2.46777	0.000169777	1.29612e-06	9.61765e-05
GOTERM_BP_FAT	GO:0007243~protein kinase cascade	38	1.28814	8.47266e-08	GADD45, DOME, MPK2, GEF26, PAK, SHARK, MBT, CNO, CKA, PUC, RL, SOCS36E, KAY, PYD, RAC2, CYCD, P38B, MSK, RAC1, SRC42A, CYCE, MSN, LIC, HEP, DSOR1, RHO1, DRK, JRA, KRN, MEKK1, SLPR, STAT92E, MKK4, MTL, SLMB, HASPIN, PTP-ER, TAK1	2266	60	7937	2.21834	0.000271258	2.02458e-06	0.000153672
GOTERM_BP_FAT	GO:0031098~stress-activated protein kinase signaling pathway	21	0.711864	3.25914e-05	HEP, GADD45, RHO1, PAK, JRA, DRK, SHARK, CNO, PUC, CKA, KAY, SLPR, DOK, PYD, RAC2, RAC1, SRC42A, MKK4, MTL, MSN, TAK1	2266	31	7937	2.37276	0.0990984	0.000434736	0.0590957
GOTERM_BP_FAT	GO:0007254~JNK cascade	20	0.677966	3.74769e-05	HEP, GADD45, RHO1, PAK, JRA, DRK, SHARK, CNO, PUC, CKA, KAY, SLPR, PYD, RAC2, SRC42A, MKK4, RAC1, MTL, MSN, TAK1	2266	29	7937	2.41562	0.113082	0.000491695	0.0679514
Annotation Cluster 25	Enrichment Score: 5.684300915968966
Category	Term	Count	%	PValue	Genes	List Total	Pop Hits	Pop Total	Fold Enrichment	Bonferroni	Benjamini	FDR
GOTERM_BP_FAT	GO:0008340~determination of adult life span	49	1.66102	2.06871e-06	LT, INDY, RB, S6KII, HSP68, MT2, CHER, MIP120, HSP27, HEP, HSP26, CLIC, GIG, TAM, RPD3, MYS, MGAT1, CHICO, EF1ALPHA48D, DOR, FWD, NC, G, ECR, POSH, MNN1, PPT1, PUC, LEVY, EDEM1, INR, S6K, FOXO, NF1, PRAT, MLE, SOD, SIRT2, SOD2, MTHL1, RUT, SIR2, MTHL9, SELG, MTHL3, CM, MTHL4, HSP67BB, MTHL5	2266	93	7937	1.84548	0.00660212	3.91945e-05	0.00375203
GOTERM_BP_FAT	GO:0007568~aging	49	1.66102	2.06871e-06	LT, INDY, RB, S6KII, HSP68, MT2, CHER, MIP120, HSP27, HEP, HSP26, CLIC, GIG, TAM, RPD3, MYS, MGAT1, CHICO, EF1ALPHA48D, DOR, FWD, NC, G, ECR, POSH, MNN1, PPT1, PUC, LEVY, EDEM1, INR, S6K, FOXO, NF1, PRAT, MLE, SOD, SIRT2, SOD2, MTHL1, RUT, SIR2, MTHL9, SELG, MTHL3, CM, MTHL4, HSP67BB, MTHL5	2266	93	7937	1.84548	0.00660212	3.91945e-05	0.00375203
GOTERM_BP_FAT	GO:0010259~multicellular organismal aging	49	1.66102	2.06871e-06	LT, INDY, RB, S6KII, HSP68, MT2, CHER, MIP120, HSP27, HEP, HSP26, CLIC, GIG, TAM, RPD3, MYS, MGAT1, CHICO, EF1ALPHA48D, DOR, FWD, NC, G, ECR, POSH, MNN1, PPT1, PUC, LEVY, EDEM1, INR, S6K, FOXO, NF1, PRAT, MLE, SOD, SIRT2, SOD2, MTHL1, RUT, SIR2, MTHL9, SELG, MTHL3, CM, MTHL4, HSP67BB, MTHL5	2266	93	7937	1.84548	0.00660212	3.91945e-05	0.00375203
Annotation Cluster 26	Enrichment Score: 5.643422018359793
Category	Term	Count	%	PValue	Genes	List Total	Pop Hits	Pop Total	Fold Enrichment	Bonferroni	Benjamini	FDR
GOTERM_BP_FAT	GO:0007059~chromosome segregation	75	2.54237	4.08146e-15	MOD(MDG4), EB1, THR, NOD, NNF1B, NNF1A, CNN, MEI-41, SUB, ROD, SU(VAR)2-HP2, CYCA, CYCB, ORC5, FIM, JIL-1, KLP67A, ORC2, EIF-4E, KLP3A, CHB, PP1-87B, CMET, MEI-9, KLP10A, MCM5, GRP, IAL, NCD, DP1, MUS312, PAV, KMN1, INVADOLYSIN, ECO, MEI-S332, GRAU, GAP1, RAB5, OAF, PROS54, NUDE, SPC25, SAN, HIS4R, EAST, TEF, POLO, PIM, RANGAP, MEI-218, MIT(1)15, CUP, SCA, FLW, TOC, LWR, SCE, SMC5, NUF2, GLU, NDC…	2266	117	7937	2.24529	1.31533e-11	2.98983e-13	7.4496e-12
GOTERM_BP_FAT	GO:0007143~female meiosis	41	1.38983	7.53243e-09	MEI-S332, GRAU, GAP1, CKS30A, NOD, SRA, RAB5, SYX13, MYT1, CNN, OAF, MEI-41, FZY, SUB, GRIP75, HIS4R, EAST, POLO, FIM, JIL-1, MEI-218, MUD, CUP, EIF-4E, SCA, KLP3A, LWR, SPN-A, MSPS, MUS304, GRIP128, MEI-9, MUS301, GRP, TACC, PP2B-14D, NCD, PAV, LANA, GLI, CORT	2266	63	7937	2.2795	2.41185e-05	2.17287e-07	1.36619e-05
GOTERM_BP_FAT	GO:0045132~meiotic chromosome segregation	36	1.22034	2.20796e-07	MOD(MDG4), MEI-S332, GRAU, GAP1, NOD, RAB5, CNN, OAF, MEI-41, NUDE, SUB, HIS4R, EAST, TEF, POLO, FIM, JIL-1, RANGAP, MEI-218, KLP67A, CUP, EIF-4E, SCA, KLP3A, LWR, MUS304, MEI-9, MCM5, MUS301, GRP, NCD, PAV, MUS312, LANA, GLI, CORT	2266	57	7937	2.2122	0.000706738	4.87577e-06	0.000400465
GOTERM_BP_FAT	GO:0007127~meiosis I	28	0.949153	1.00566e-05	GRAU, MEI-S332, SRA, MEI-41, EAST, TEF, MUS81, OKR, DALLY, MEI-218, REC, ERCC1, L(1)DD4, MSH6, MIT(1)15, KLP3A, SPN-B, MUS304, SPN-D, MEI-9, SSE, MCM5, MUS312, MUS309, MEI-W68, PELO, CORT, SXL	2266	45	7937	2.17943	0.0316884	0.000152601	0.0182384
GOTERM_BP_FAT	GO:0016321~female meiosis chromosome segregation	22	0.745763	5.37322e-05	EIF-4E, KLP3A, SCA, GAP1, LWR, RAB5, MUS304, CNN, OAF, MEI-9, MEI-41, MUS301, GRP, SUB, HIS4R, PAV, EAST, LANA, FIM, JIL-1, GLI, MEI-218	2266	34	7937	2.26642	0.158067	0.000669252	0.0974114
GOTERM_BP_FAT	GO:0051327~M phase of meiotic cell cycle	75	2.54237	0.00535223	MOD(MDG4), NOD, CNN, SYX13, MEI-41, FZY, SUB, GRIP75, OKR, FIM, JIL-1, DALLY, KLP67A, L(1)DD4, EIF-4E, KLP3A, SPN-B, SPN-A, SPN-D, TAF12L, MEI-9, MCM5, RAD50, MRE11, GRP, TACC, IAL, PP2B-14D, NCD, SCRA, MUS312, PAV, PELO, SXL, MEI-S332, GRAU, GAP1, CKS30A, SRA, RAB5, MYT1, OAF, NUDE, HIS4R, EAST, TEF, MUS81, POLO, REC, RANGAP, MEI-218, ERCC1, MSH6, MIT(1)15, MUD, CUP, SCA, LWR, SCE, MSPS, MUS304,…	2266	200	7937	1.31349	1	0.0412427	9.27491
GOTERM_BP_FAT	GO:0007126~meiosis	75	2.54237	0.00535223	MOD(MDG4), NOD, CNN, SYX13, MEI-41, FZY, SUB, GRIP75, OKR, FIM, JIL-1, DALLY, KLP67A, L(1)DD4, EIF-4E, KLP3A, SPN-B, SPN-A, SPN-D, TAF12L, MEI-9, MCM5, RAD50, MRE11, GRP, TACC, IAL, PP2B-14D, NCD, SCRA, MUS312, PAV, PELO, SXL, MEI-S332, GRAU, GAP1, CKS30A, SRA, RAB5, MYT1, OAF, NUDE, HIS4R, EAST, TEF, MUS81, POLO, REC, RANGAP, MEI-218, ERCC1, MSH6, MIT(1)15, MUD, CUP, SCA, LWR, SCE, MSPS, MUS304,…	2266	200	7937	1.31349	1	0.0412427	9.27491
GOTERM_BP_FAT	GO:0051321~meiotic cell cycle	78	2.64407	0.00677843	MOD(MDG4), NOD, FWS, CNN, SYX13, MEI-41, FZY, SUB, GRIP75, OKR, FIM, JIL-1, DALLY, KLP67A, L(1)DD4, EIF-4E, KLP3A, SPN-B, SPN-A, SPN-D, TAF12L, MEI-9, MCM5, RAD50, MRE11, GRP, TACC, IAL, PP2B-14D, NCD, SCRA, MUS312, PAV, FWD, PELO, SXL, MEI-S332, GRAU, GAP1, CKS30A, SRA, RAB5, MYT1, OAF, NUDE, HIS4R, EAST, MUS81, TEF, POLO, REC, RANGAP, MEI-218, ERCC1, MSH6, MIT(1)15, MUD, CUP, SCA, LWR, SCE, MSP…	2266	211	7937	1.29482	1	0.050886	11.6056
Annotation Cluster 27	Enrichment Score: 5.572986121755893
Category	Term	Count	%	PValue	Genes	List Total	Pop Hits	Pop Total	Fold Enrichment	Bonferroni	Benjamini	FDR
GOTERM_BP_FAT	GO:0006928~cell motion	133	4.50847	1.49429e-08	PVR, SPI, DSH, HMGCR, PGC, LIPRIN-ALPHA, GEF26, SHI, DAD, SHG, RAS85D, DAW, NOT, NIPP1, STAN, SMOX, STAI, HRS, E(Z), EGFR, CV-C, CHB, PP1-87B, SQH, MRTF, SEMA-5C, CP309, FMR1, SQD, NETB, PAR-6, EPHRIN, CPB, SLMB, INVADOLYSIN, SHOT, OTK, SBB, SEMA-2A, KEL, PAK, PLEXB, RAB5, PLEXA, N, RAC2, INR, RAC1, NUMB, EGH, CG6905, SCB, CUP, ROC1B, HB, RHO1, FPS85D, OUT, GISH, PTPMEG, LAR, NEDD4, LANA, PHL, MT…	2266	305	7937	1.52738	4.7846e-05	3.98726e-07	2.71025e-05
GOTERM_BP_FAT	GO:0016477~cell migration	81	2.74576	7.86093e-07	MOD(MDG4), PVR, HH, RHOL, SPI, HMGCR, PGC, GEF26, ESG, CORTACTIN, PVF1, SHI, PVF3, SHG, KAY, RAS85D, HOW, SGF11, SLI, NOT, ROBO, FOI, STAI, IF, HRS, EGFR, HEP, CV-C, CSW, DSOR1, SQH, MRTF, PBL, SQD, SPEN, RAP, MYS, KRN, PAR-6, DOR, CPB, SLMB, RME-8, JING, INVADOLYSIN, DOME, ECR, KEL, KIS, SFL, RAB5, N, PUC, DPP, ETS98B, RAC2, DISP, NUMB, RAC1, SRC42A, TAI, EGH, HRB27C, SCB, CUP, HB, STUMPS, RHO1,…	2266	175	7937	1.62123	0.00251391	1.6239e-05	0.00142576
GOTERM_BP_FAT	GO:0048870~cell motility	84	2.84746	2.17614e-06	MOD(MDG4), PVR, HH, RHOL, SPI, HMGCR, PGC, GEF26, ESG, CORTACTIN, PVF1, SHI, PVF3, SHG, KAY, RAS85D, HOW, SGF11, SLI, NOT, ROBO, FOI, MIP120, STAI, IF, HRS, EGFR, HEP, CV-C, CSW, DSOR1, SQH, MRTF, CP309, PBL, SQD, SPEN, RAP, MYS, KRN, PAR-6, DOR, CPB, SLMB, RME-8, JING, INVADOLYSIN, DOME, ECR, KEL, KIS, SFL, RAB5, N, PUC, ETS98B, DPP, RAC2, DISP, NUMB, SRC42A, RAC1, TAI, EGH, HRB27C, CG6905, SCB,…	2266	187	7937	1.57338	0.00694379	4.05109e-05	0.00394688
GOTERM_BP_FAT	GO:0051674~localization of cell	86	2.91525	5.13928e-06	MOD(MDG4), PVR, HH, RHOL, SPI, HMGCR, PGC, GEF26, ESG, CORTACTIN, PVF1, SHI, PVF3, SHG, KAY, RAS85D, HOW, SGF11, SLI, NOT, ROBO, FOI, MIP120, STAI, IF, HRS, EGFR, HEP, CV-C, CSW, DSOR1, SQH, MRTF, CP309, PBL, SPN-D, SQD, SPN-E, SPEN, RAP, MYS, KRN, PAR-6, DOR, CPB, SLMB, RME-8, JING, INVADOLYSIN, DOME, ECR, KEL, KIS, SFL, RAB5, N, PUC, ETS98B, DPP, RAC2, DISP, NUMB, SRC42A, RAC1, TAI, EGH, HRB27C…	2266	196	7937	1.53688	0.0163214	8.79962e-05	0.00932091
GOTERM_BP_FAT	GO:0007298~border follicle cell migration	36	1.22034	2.31442e-05	PVR, SPI, RHOL, ECR, DOME, KIS, CORTACTIN, PVF1, RAB5, SHI, N, PUC, KAY, SHG, RAS85D, RAC1, TAI, EGH, HRB27C, HRS, EGFR, HEP, DSOR1, MRTF, SQH, SL, KRN, PAR-6, STAT92E, DOR, PHL, CPB, RME-8, SLMB, JING, ENA	2266	66	7937	1.91054	0.071429	0.000316653	0.0419692
GOTERM_BP_FAT	GO:0007297~ovarian follicle cell migration	39	1.32203	0.00011999	PVR, SPI, RHOL, ECR, DOME, KEL, KIS, CORTACTIN, PVF1, RAB5, SHI, N, PUC, KAY, SHG, RAS85D, RAC1, TAI, EGH, HRB27C, HRS, EGFR, HEP, CUP, DSOR1, SQH, MRTF, SL, SQD, KRN, PAR-6, STAT92E, DOR, PHL, SLMB, CPB, RME-8, JING, ENA	2266	78	7937	1.75132	0.319025	0.00139117	0.217406
Annotation Cluster 28	Enrichment Score: 5.334033486359689
Category	Term	Count	%	PValue	Genes	List Total	Pop Hits	Pop Total	Fold Enrichment	Bonferroni	Benjamini	FDR
GOTERM_MF_FAT	GO:0003678~DNA helicase activity	29	0.983051	4.79101e-08	RECQ5, HEL89B, MARCAL1, RECQ4, INO80, ISWI, SLD5, IRBP, MCM7, HAY, MI-2, KU80, OKR, REC, CG9791, PONT, REPT, DPA, EIF-4A, MUS304, MCM2, MCM3, MCM5, PSF3, MCM6, PSF2, PSF1, MUS309, TFIIFBETA	2237	40	7918	2.56618	6.61138e-05	2.8746e-06	7.88014e-05
GOTERM_MF_FAT	GO:0008094~DNA-dependent ATPase activity	26	0.881356	3.25907e-07	RAD51D, RECQ5, HEL89B, RAD51C, MARCAL1, RECQ4, RFC38, ISWI, IRBP, HAY, MI-2, KU80, OKR, REC, LDS, SPN-B, SPN-A, EIF-4A, CG8142, MUS304, SPN-D, RFC3, DOM, MUS309, GNF1, TFIIFBETA	2237	36	7918	2.55635	0.000449651	1.60624e-05	0.000536043
GOTERM_MF_FAT	GO:0004003~ATP-dependent DNA helicase activity	12	0.40678	0.00637351	RECQ5, IRBP, HEL89B, HAY, MUS309, MI-2, KU80, EIF-4A, OKR, MUS304, REC, TFIIFBETA	2237	19	7918	2.23551	0.999853	0.113852	9.98244
Annotation Cluster 29	Enrichment Score: 5.288212296423934
Category	Term	Count	%	PValue	Genes	List Total	Pop Hits	Pop Total	Fold Enrichment	Bonferroni	Benjamini	FDR
GOTERM_MF_FAT	GO:0008092~cytoskeletal protein binding	96	3.25424	6.64895e-07	EB1, CHIC, STAU, KST, SDC, NOD, GRIP71, SHI, TM1, MBS, MOE, CNO, DIDUM, CNN, PTEN, CP190, MAP205, GRIP75, DAAM, CG9915, FIM, CHER, STAI, L(1)DD4, L(2)GL, POD1, CHB, MICAL-LIKE, KLP3A, SQH, SYD, GEL, COS, SPAS, PEZ, PNUT, KATANIN-60, TACC, CG8397, FORM3, SCRA, P16-ARC, MIB2, SSP4, CPA, FLII, CPB, MILT, SHOT, KHC-73, F, KAT80, KEL, MSP-300, KEAP1, CORA, CIB, MYO61F, TMOD, CHD64, MLC-C, NUDE, CYLD, …	2237	218	7918	1.55871	0.000917134	2.95981e-05	0.0010936
GOTERM_MF_FAT	GO:0015631~tubulin binding	38	1.28814	4.73564e-06	EB1, KHC-73, STAU, KAT80, KST, NOD, GRIP71, SHI, CNN, CP190, NUDE, MAP205, CYLD, LVA, GRIP75, DGT2, STAI, L(1)DD4, SPINDLY, CHB, KLP3A, HTT, NUF, MSPS, GRIP128, COS, SPAS, GRIP84, PNUT, KATANIN-60, GRIP163, TACC, MAP60, SCRA, MAPMODULIN, SSP4, KHC, SHOT	2237	68	7918	1.97799	0.00651389	0.000186703	0.00778878
GOTERM_MF_FAT	GO:0008017~microtubule binding	34	1.15254	4.33742e-05	EB1, KHC-73, STAU, KAT80, KST, NOD, SHI, CNN, CP190, NUDE, MAP205, CYLD, LVA, DGT2, STAI, L(1)DD4, SPINDLY, CHB, KLP3A, HTT, NUF, MSPS, COS, SPAS, GRIP84, PNUT, KATANIN-60, TACC, MAPMODULIN, SCRA, MAP60, SSP4, KHC, SHOT	2237	63	7918	1.91024	0.0581014	0.00142417	0.0713169
Annotation Cluster 30	Enrichment Score: 5.16406702925537
Category	Term	Count	%	PValue	Genes	List Total	Pop Hits	Pop Total	Fold Enrichment	Bonferroni	Benjamini	FDR
GOTERM_BP_FAT	GO:0060284~regulation of cell development	74	2.50847	4.7473e-11	FSN, SINA, ROP, SPI, STAU, EPS-15, GEF26, ED, MBS, MBT, RHOGEF2, RL, SDK, S6KII, RAS85D, DAP160, ROK, L(2)GL, DLG1, EGFR, SPICT, CSW, LIMK1, FMR1, PBL, STY, NACALPHA, SPN-E, MR, FRY, TER94, SYX1A, GALPHA49B, RAB11, SHOT, NC, GAP1, PAK, N, MAGO, PKA-C1, MORGUE, SS, LVA, RAC2, NUMB, RAC1, SAV, SAR1, SEC23, POLO, SAX, HRB27C, SSH, MER, NSF2, CUP, MAD, RHO1, TKV, RHOGAPP190, SPIN, ICE, EXU, MTS, KLU,…	2266	131	7937	1.97859	1.52009e-07	1.85376e-09	8.61037e-08
GOTERM_BP_FAT	GO:0051960~regulation of nervous system development	50	1.69492	1.95404e-07	SINA, FSN, EPS-15, ED, GEF26, MBS, MBT, RHOGEF2, RL, SDK, S6KII, RAS85D, DAP160, ROK, L(2)GL, SPICT, CSW, LIMK1, FMR1, STY, PBL, MR, FRY, SHOT, GAP1, PAK, N, SS, RAC2, LVA, RAC1, NUMB, SAR1, SAV, POLO, SEC23, SAX, SSH, NSF2, MAD, RHO1, RHOGAPP190, TKV, SPIN, MTS, NEDD4, RAB1, PHL, PUM, EFF	2266	90	7937	1.94592	0.000625488	4.34502e-06	0.000354411
GOTERM_BP_FAT	GO:0050767~regulation of neurogenesis	39	1.32203	1.18099e-06	SINA, GAP1, GEF26, PAK, ED, MBS, N, MBT, RHOGEF2, RL, SDK, S6KII, RAS85D, SS, LVA, RAC2, RAC1, DAP160, NUMB, SAR1, SAV, POLO, SEC23, ROK, L(2)GL, SSH, CSW, LIMK1, RHO1, FMR1, PBL, STY, RHOGAPP190, FRY, MTS, RAB1, PHL, SHOT, EFF	2266	67	7937	2.03885	0.00377439	2.31993e-05	0.00214199
GOTERM_BP_FAT	GO:0045664~regulation of neuron differentiation	33	1.11864	2.23638e-06	SINA, GAP1, PAK, GEF26, N, MBS, MBT, RHOGEF2, RL, SDK, S6KII, RAS85D, SS, RAC2, LVA, RAC1, SAR1, SAV, SEC23, ROK, SSH, CSW, LIMK1, RHO1, FMR1, PBL, RHOGAPP190, STY, FRY, RAB1, PHL, SHOT, EFF	2266	54	7937	2.14051	0.00713533	4.13917e-05	0.00405614
GOTERM_BP_FAT	GO:0031344~regulation of cell projection organization	23	0.779661	0.000141526	SSH, LIMK1, RHO1, FMR1, PAK, RHOGAPP190, PBL, TM1, RHOGEF2, FRY, SS, RAC2, LVA, RAB1, RAC1, CPA, SAR1, SAV, CPB, SEC23, ENA, ROK, SHOT	2266	38	7937	2.12002	0.364407	0.00162304	0.25638
GOTERM_BP_FAT	GO:0010975~regulation of neuron projection development	19	0.644068	0.000310823	SSH, LIMK1, RHO1, FMR1, PAK, RHOGAPP190, PBL, RHOGEF2, FRY, SS, RAC2, LVA, RAB1, RAC1, SAR1, SAV, SEC23, ROK, SHOT	2266	30	7937	2.21834	0.630428	0.00319556	0.562253
GOTERM_BP_FAT	GO:0010769~regulation of cell morphogenesis involved in differentiation	19	0.644068	0.000310823	SSH, LIMK1, RHO1, FMR1, PAK, RHOGAPP190, PBL, RHOGEF2, FRY, SS, RAC2, LVA, RAB1, RAC1, SAR1, SAV, SEC23, ROK, SHOT	2266	30	7937	2.21834	0.630428	0.00319556	0.562253
GOTERM_BP_FAT	GO:0050770~regulation of axonogenesis	11	0.372881	0.0145355	SSH, RAC2, LIMK1, RHO1, PAK, RAC1, PBL, RHOGAPP190, RHOGEF2, ROK, SHOT	2266	18	7937	2.14051	1	0.100211	23.3232
Annotation Cluster 31	Enrichment Score: 5.143598081468209
Category	Term	Count	%	PValue	Genes	List Total	Pop Hits	Pop Total	Fold Enrichment	Bonferroni	Benjamini	FDR
GOTERM_BP_FAT	GO:0046530~photoreceptor cell differentiation	68	2.30508	9.83559e-09	LILLI, SINA, HH, DSH, RG, SPI, MBL, DOA, LIPRIN-ALPHA, SEC6, P47, MELT, MBT, MOE, DIDUM, CKA, DAB, RL, KAY, CNK, RAS85D, HTH, MSK, STAN, MSN, EGFR, CSW, RNO, RIP11, DSOR1, JRA, EX, PNUT, FRY, EDL, DOS, RAB11, SBB, ECR, POSH, FZ, N, HSP83, RIN, RAC2, S, SW, RAC1, SAV, EMC, MER, SCA, HPO, MASK, FPS85D, DRK, DA, KLAR, NEJ, MTS, CRB, LAR, SOS, KHC, PTP-ER, CSN5, CSN4, EFF	2266	128	7937	1.86078	3.14931e-05	2.76259e-07	1.78392e-05
GOTERM_BP_FAT	GO:0001754~eye photoreceptor cell differentiation	63	2.13559	1.23149e-08	LILLI, SINA, HH, SPI, DSH, RG, MBL, DOA, SEC6, LIPRIN-ALPHA, P47, MELT, MBT, MOE, CKA, DAB, DIDUM, RL, KAY, CNK, RAS85D, HTH, MSK, STAN, EGFR, CSW, RNO, RIP11, DSOR1, EX, JRA, PNUT, FRY, DOS, RAB11, POSH, FZ, N, HSP83, RIN, RAC2, S, SW, RAC1, SAV, EMC, MER, SCA, HPO, MASK, DRK, DA, KLAR, NEJ, MTS, CRB, LAR, SOS, KHC, PTP-ER, CSN5, CSN4, EFF	2266	116	7937	1.9023	3.94317e-05	3.34173e-07	2.23361e-05
GOTERM_BP_FAT	GO:0007423~sensory organ development	169	5.72881	1.96387e-08	LILLI, SINA, DSH, SPI, SHN, EC, LIPRIN-ALPHA, ED, GEF26, CNO, PNR, MOE, DAB, DIDUM, SHG, CNK, RAS85D, JAGN, HTH, DS, STAN, ROK, L(2)GL, EGFR, JUMU, RNO, EXD, SPN-F, JRA, PWN, EX, TAN, FRY, MIB1, DSX, EDL, MED17, SNAP, PELO, NC, SHOT, RAB11, F, PIE, SU(VAR)2-10, FZ, L, RAB6, FNG, N, MIRR, FW, PKA-C1, PAD, FT, EGM, RIN, RAC2, S, RAC1, NUMB, FJ, SAV, EMC, SAX, SU(H), SCAR, SSH, MER, SCA, RHO1, SCE, …	2266	410	7937	1.44377	6.2881e-05	5.15434e-07	3.56194e-05
GOTERM_BP_FAT	GO:0001751~compound eye photoreceptor cell differentiation	60	2.0339	3.6186e-08	LILLI, SINA, SPI, DSH, HH, MBL, DOA, SEC6, LIPRIN-ALPHA, P47, MELT, MBT, MOE, CKA, DAB, DIDUM, RL, KAY, CNK, RAS85D, HTH, MSK, STAN, EGFR, CSW, RNO, RIP11, DSOR1, EX, JRA, PNUT, FRY, DOS, RAB11, POSH, FZ, N, HSP83, RIN, RAC2, S, RAC1, SAV, EMC, MER, SCA, HPO, MASK, DRK, DA, KLAR, NEJ, MTS, CRB, LAR, SOS, PTP-ER, CSN5, CSN4, EFF	2266	111	7937	1.89332	0.000115861	9.12343e-07	6.5632e-05
GOTERM_BP_FAT	GO:0048749~compound eye development	124	4.20339	7.62022e-06	SINA, LILLI, SPI, DSH, SHN, EC, LIPRIN-ALPHA, GEF26, MOE, CNO, DAB, DIDUM, CNK, SHG, RAS85D, HTH, DS, STAN, ROK, EGFR, JUMU, RNO, JRA, EX, FRY, MIB1, SNAP, PELO, NC, RAB11, PIE, SU(VAR)2-10, FZ, L, RAB6, FNG, N, MIRR, PKA-C1, EGM, RIN, FT, RAC2, S, RAC1, SAV, FJ, EMC, SAX, SCAR, SSH, MER, SCA, RHO1, TKV, MTS, RCA1, LAR, LAM, SOP2, EFF, HH, RG, MBL, DOA, CKIIALPHA, SEC6, P47, L(2)GD1, PINK1, MELT,…	2266	308	7937	1.41016	0.0241048	0.000122606	0.0138202
GOTERM_BP_FAT	GO:0001745~compound eye morphogenesis	104	3.52542	8.76843e-06	SINA, LILLI, SPI, DSH, SHN, EC, LIPRIN-ALPHA, MOE, CNO, DIDUM, DAB, CNK, SHG, RAS85D, DS, HTH, STAN, ROK, EGFR, RNO, EX, JRA, FRY, MIB1, SNAP, PELO, RAB11, FZ, RAB6, FNG, N, MIRR, EGM, RIN, FT, RAC2, S, RAC1, SAV, FJ, EMC, SAX, SCAR, MER, SCA, RHO1, TKV, MTS, RCA1, LAR, LAM, SOP2, EFF, RG, HH, MBL, DOA, SEC6, P47, MELT, MBT, CKA, RL, SDK, KAY, MSK, CSW, RIP11, DSOR1, STY, RAP, PNUT, DGO, KRN, DOS…	2266	250	7937	1.4571	0.0276862	0.000135627	0.0159025
GOTERM_BP_FAT	GO:0048592~eye morphogenesis	110	3.72881	1.17854e-05	SINA, LILLI, SPI, DSH, SHN, EC, LIPRIN-ALPHA, MOE, CNO, DIDUM, DAB, CNK, SHG, RAS85D, HTH, DS, STAN, ROK, EGFR, RNO, EX, JRA, FRY, MIB1, SNAP, PELO, RAB11, FZ, RAB6, FNG, N, MIRR, EGM, RIN, FT, RAC2, S, RAC1, SAV, FJ, EMC, SAX, SCAR, MER, SCA, RHO1, TKV, MTS, RCA1, LAR, LAM, SOP2, EFF, HH, RG, MBL, DOA, SEC6, P47, MELT, MBT, CKA, RL, SDK, KAY, MSK, CSW, RIP11, DSOR1, STY, RAP, PTC, PNUT, DGO, KRN…	2266	269	7937	1.43231	0.0370339	0.000176326	0.0213735
GOTERM_BP_FAT	GO:0001654~eye development	131	4.44068	1.34422e-05	SINA, LILLI, SPI, DSH, SHN, EC, LIPRIN-ALPHA, GEF26, CNO, MOE, DAB, DIDUM, CNK, SHG, RAS85D, HTH, DS, STAN, ROK, EGFR, JUMU, RNO, EXD, JRA, EX, FRY, MIB1, SNAP, PELO, NC, RAB11, PIE, SU(VAR)2-10, FZ, L, RAB6, FNG, N, MIRR, PKA-C1, EGM, RIN, FT, RAC2, S, RAC1, SAV, FJ, EMC, SAX, SCAR, SSH, MER, SCA, RHO1, TKV, MTS, RCA1, LAR, LAM, SOP2, EFF, HH, RG, MBL, DOA, CKIIALPHA, SEC6, P47, L(2)GD1, PINK1, …	2266	332	7937	1.38207	0.0421291	0.00019925	0.0243779
GOTERM_BP_FAT	GO:0042461~photoreceptor cell development	33	1.11864	0.000151834	LILLI, SPI, RG, SBB, ECR, DOA, POSH, SEC6, LIPRIN-ALPHA, P47, N, MOE, CKA, DAB, DIDUM, RL, RAC2, MSK, S, RAC1, STAN, MSN, RNO, RIP11, FPS85D, KLAR, PNUT, FRY, CRB, EDL, LAR, DOS, RAB11	2266	63	7937	1.83472	0.385046	0.00170454	0.275029
GOTERM_BP_FAT	GO:0042462~eye photoreceptor cell development	27	0.915254	0.00171034	LILLI, SPI, RG, DOA, POSH, LIPRIN-ALPHA, SEC6, P47, N, MOE, DAB, DIDUM, CKA, RL, RAC2, MSK, S, RAC1, STAN, RNO, RIP11, KLAR, PNUT, FRY, CRB, LAR, RAB11	2266	54	7937	1.75132	0.995836	0.0149047	3.05706
GOTERM_BP_FAT	GO:0042051~compound eye photoreceptor development	26	0.881356	0.0029674	LILLI, SPI, DOA, POSH, LIPRIN-ALPHA, SEC6, P47, N, MOE, DAB, DIDUM, CKA, RL, RAC2, S, MSK, RAC1, STAN, RNO, RIP11, KLAR, PNUT, FRY, CRB, LAR, RAB11	2266	53	7937	1.71828	0.999926	0.0242886	5.2474
GOTERM_BP_FAT	GO:0042052~rhabdomere development	12	0.40678	0.0269406	CRB, RIP11, RAC2, MSK, POSH, RAC1, SEC6, P47, MOE, DIDUM, RAB11, FRY	2266	22	7937	1.91054	1	0.169774	39.0633
Annotation Cluster 32	Enrichment Score: 5.1233511612649565
Category	Term	Count	%	PValue	Genes	List Total	Pop Hits	Pop Total	Fold Enrichment	Bonferroni	Benjamini	FDR
GOTERM_BP_FAT	GO:0010741~negative regulation of protein kinase cascade	17	0.576271	1.53077e-07	KEN, FLW, SU(VAR)2-10, L, SAC1, MKP3, N, MNN1, PUC, PTEN, SOCS36E, STCK, PARK, KAPPAB-RAS, RALA, PSR, ICS	2266	18	7937	3.30806	0.000490033	3.47626e-06	0.000277642
GOTERM_BP_FAT	GO:0048585~negative regulation of response to stimulus	19	0.644068	3.14479e-07	FOXO, FLW, MPK2, L, GIG, SAC1, JRA, N, DSP1, MNN1, PUC, PTEN, STCK, PARK, STAT92E, RALA, PSR, ICS, SPN27A	2266	22	7937	3.02501	0.00100646	6.80378e-06	0.000570382
GOTERM_BP_FAT	GO:0010627~regulation of protein kinase cascade	29	0.983051	1.28967e-06	KEN, RHOGAP5A, SU(VAR)2-10, SAC1, L, RDX, MNN1, N, CNO, PUC, CKA, PTEN, SOCS36E, PYD, STCK, KAPPAB-RAS, PARK, RALA, HEP, RAW, FLW, SYD, MKP3, SLPR, LKB1, MKK4, PSR, ICS, CRK	2266	44	7937	2.30856	0.00412101	2.51797e-05	0.0023391
GOTERM_BP_FAT	GO:0043408~regulation of MAPKKK cascade	24	0.813559	2.4444e-06	HEP, RHOGAP5A, RAW, FLW, SYD, SAC1, L, MKP3, RDX, N, MNN1, CNO, PUC, CKA, SLPR, PYD, STCK, LKB1, PARK, MKK4, RALA, PSR, ICS, CRK	2266	34	7937	2.47246	0.00779644	4.49817e-05	0.00443342
GOTERM_BP_FAT	GO:0070302~regulation of stress-activated protein kinase signaling pathway	22	0.745763	1.39482e-05	HEP, RAW, FLW, SYD, SAC1, L, RDX, N, MNN1, CNO, PUC, CKA, SLPR, PYD, STCK, LKB1, PARK, MKK4, RALA, PSR, ICS, CRK	2266	32	7937	2.40807	0.0436798	0.000204853	0.0252954
GOTERM_BP_FAT	GO:0046328~regulation of JNK cascade	22	0.745763	1.39482e-05	HEP, RAW, FLW, SYD, SAC1, L, RDX, N, MNN1, CNO, PUC, CKA, SLPR, PYD, STCK, LKB1, PARK, MKK4, RALA, PSR, ICS, CRK	2266	32	7937	2.40807	0.0436798	0.000204853	0.0252954
GOTERM_BP_FAT	GO:0080135~regulation of cellular response to stress	22	0.745763	2.80672e-05	HEP, RAW, FLW, SYD, SAC1, L, RDX, N, MNN1, CNO, PUC, CKA, SLPR, PYD, STCK, LKB1, PARK, MKK4, RALA, PSR, ICS, CRK	2266	33	7937	2.3351	0.0859521	0.000380742	0.0508943
GOTERM_BP_FAT	GO:0043409~negative regulation of MAPKKK cascade	12	0.40678	4.28643e-05	STCK, FLW, PARK, SAC1, L, RALA, MKP3, MNN1, PSR, ICS, N, PUC	2266	13	7937	3.23321	0.128252	0.000555532	0.0777162
GOTERM_BP_FAT	GO:0046329~negative regulation of JNK cascade	11	0.372881	0.000128234	STCK, FLW, PARK, SAC1, L, RALA, MNN1, PSR, ICS, N, PUC	2266	12	7937	3.21076	0.336768	0.001476	0.232327
GOTERM_BP_FAT	GO:0070303~negative regulation of stress-activated protein kinase signaling pathway	11	0.372881	0.000128234	STCK, FLW, PARK, SAC1, L, RALA, MNN1, PSR, ICS, N, PUC	2266	12	7937	3.21076	0.336768	0.001476	0.232327
Annotation Cluster 33	Enrichment Score: 5.019974952836942
Category	Term	Count	%	PValue	Genes	List Total	Pop Hits	Pop Total	Fold Enrichment	Bonferroni	Benjamini	FDR
GOTERM_BP_FAT	GO:0046530~photoreceptor cell differentiation	68	2.30508	9.83559e-09	LILLI, SINA, HH, DSH, RG, SPI, MBL, DOA, LIPRIN-ALPHA, SEC6, P47, MELT, MBT, MOE, DIDUM, CKA, DAB, RL, KAY, CNK, RAS85D, HTH, MSK, STAN, MSN, EGFR, CSW, RNO, RIP11, DSOR1, JRA, EX, PNUT, FRY, EDL, DOS, RAB11, SBB, ECR, POSH, FZ, N, HSP83, RIN, RAC2, S, SW, RAC1, SAV, EMC, MER, SCA, HPO, MASK, FPS85D, DRK, DA, KLAR, NEJ, MTS, CRB, LAR, SOS, KHC, PTP-ER, CSN5, CSN4, EFF	2266	128	7937	1.86078	3.14931e-05	2.76259e-07	1.78392e-05
GOTERM_BP_FAT	GO:0001754~eye photoreceptor cell differentiation	63	2.13559	1.23149e-08	LILLI, SINA, HH, SPI, DSH, RG, MBL, DOA, SEC6, LIPRIN-ALPHA, P47, MELT, MBT, MOE, CKA, DAB, DIDUM, RL, KAY, CNK, RAS85D, HTH, MSK, STAN, EGFR, CSW, RNO, RIP11, DSOR1, EX, JRA, PNUT, FRY, DOS, RAB11, POSH, FZ, N, HSP83, RIN, RAC2, S, SW, RAC1, SAV, EMC, MER, SCA, HPO, MASK, DRK, DA, KLAR, NEJ, MTS, CRB, LAR, SOS, KHC, PTP-ER, CSN5, CSN4, EFF	2266	116	7937	1.9023	3.94317e-05	3.34173e-07	2.23361e-05
GOTERM_BP_FAT	GO:0001751~compound eye photoreceptor cell differentiation	60	2.0339	3.6186e-08	LILLI, SINA, SPI, DSH, HH, MBL, DOA, SEC6, LIPRIN-ALPHA, P47, MELT, MBT, MOE, CKA, DAB, DIDUM, RL, KAY, CNK, RAS85D, HTH, MSK, STAN, EGFR, CSW, RNO, RIP11, DSOR1, EX, JRA, PNUT, FRY, DOS, RAB11, POSH, FZ, N, HSP83, RIN, RAC2, S, RAC1, SAV, EMC, MER, SCA, HPO, MASK, DRK, DA, KLAR, NEJ, MTS, CRB, LAR, SOS, PTP-ER, CSN5, CSN4, EFF	2266	111	7937	1.89332	0.000115861	9.12343e-07	6.5632e-05
GOTERM_BP_FAT	GO:0001752~compound eye photoreceptor fate commitment	29	0.983051	8.35743e-06	SINA, DSH, HH, FZ, MELT, N, DAB, RL, KAY, RAS85D, HSP83, RIN, HTH, SAV, STAN, EMC, EGFR, CSW, HPO, SCA, DSOR1, DRK, JRA, DA, NEJ, MTS, SOS, DOS, PTP-ER	2266	47	7937	2.16121	0.0264057	0.000131171	0.0151571
GOTERM_BP_FAT	GO:0042706~eye photoreceptor cell fate commitment	29	0.983051	8.35743e-06	SINA, DSH, HH, FZ, MELT, N, DAB, RL, KAY, RAS85D, HSP83, RIN, HTH, SAV, STAN, EMC, EGFR, CSW, HPO, SCA, DSOR1, DRK, JRA, DA, NEJ, MTS, SOS, DOS, PTP-ER	2266	47	7937	2.16121	0.0264057	0.000131171	0.0151571
GOTERM_BP_FAT	GO:0048663~neuron fate commitment	31	1.05085	2.71715e-05	SINA, DSH, HH, FZ, MELT, N, DAB, RL, KAY, RAS85D, HSP83, RIN, HTH, SAV, STAN, EMC, EGFR, CSW, HPO, SCA, DSOR1, DRK, JRA, DA, NEJ, MTS, SOS, DOS, PTP-ER, EXBA, CRN	2266	54	7937	2.01078	0.0833269	0.000370163	0.0492706
GOTERM_BP_FAT	GO:0046552~photoreceptor cell fate commitment	29	0.983051	6.67827e-05	SINA, DSH, HH, FZ, MELT, N, DAB, RL, KAY, RAS85D, HSP83, RIN, HTH, SAV, STAN, EMC, EGFR, CSW, HPO, SCA, DSOR1, DRK, JRA, DA, NEJ, MTS, SOS, DOS, PTP-ER	2266	51	7937	1.9917	0.192527	0.00081277	0.121057
GOTERM_BP_FAT	GO:0045466~R7 cell differentiation	18	0.610169	0.00113319	EGFR, SINA, CSW, DSOR1, LIPRIN-ALPHA, JRA, DRK, N, DAB, RL, NEJ, MTS, RAS85D, HSP83, LAR, SOS, DOS, PTP-ER	2266	30	7937	2.10159	0.973498	0.010261	2.03547
GOTERM_BP_FAT	GO:0045500~sevenless signaling pathway	8	0.271186	0.00311283	RAS85D, CSW, DSOR1, SOS, DOS, DRK, DAB, RL	2266	9	7937	3.11346	0.999954	0.0251448	5.49776
GOTERM_BP_FAT	GO:0007465~R7 cell fate commitment	13	0.440678	0.00322178	SINA, CSW, DSOR1, DRK, JRA, DAB, RL, RAS85D, MTS, HSP83, SOS, DOS, PTP-ER	2266	20	7937	2.27672	0.999967	0.0259495	5.68492
Annotation Cluster 34	Enrichment Score: 4.874063694521215
Category	Term	Count	%	PValue	Genes	List Total	Pop Hits	Pop Total	Fold Enrichment	Bonferroni	Benjamini	FDR
GOTERM_BP_FAT	GO:0040008~regulation of growth	60	2.0339	8.0835e-10	FSN, HH, EPS-15, DRPR, PTEN, DM, RAS85D, STEP, CYCD, LACK, MBC, DALLY, CSK, ORCT2, SPICT, LK6, PI3K21B, EIF-4E, FMR1, GIG, EX, PATH, MR, DSX, CHICO, MNT, PSR, SHOT, TCTP, SBB, L, N, CIC, PI3K92E, DPP, FT, DCO, INR, RAC1, FAT2, PIP, SAV, SAX, S6K, MER, NSF2, MAD, HPO, FOXO, PAIP2, NF1, TKV, SPIN, SOG, PK61C, RASSF, PHL, PUM, RHEB, CHRB	2266	103	7937	2.04038	2.58833e-06	2.64116e-08	1.46614e-06
GOTERM_BP_FAT	GO:0046620~regulation of organ growth	22	0.745763	1.39482e-05	S6K, MER, PI3K21B, HH, HPO, SBB, TKV, L, GIG, EX, PK61C, PTEN, DM, DSX, PI3K92E, CHICO, FT, DPP, INR, FAT2, SAV, DALLY	2266	32	7937	2.40807	0.0436798	0.000204853	0.0252954
GOTERM_BP_FAT	GO:0048638~regulation of developmental growth	22	0.745763	0.00117885	SPICT, FSN, NSF2, MAD, SBB, EPS-15, FMR1, TKV, L, SPIN, EX, MR, PI3K92E, DSX, FT, DPP, FAT2, SAV, PUM, DALLY, SAX, SHOT	2266	40	7937	1.92646	0.977106	0.0106424	2.11666
GOTERM_BP_FAT	GO:0045570~regulation of imaginal disc growth	11	0.372881	0.00239977	DSX, PI3K92E, FT, SBB, DPP, FAT2, L, TKV, EX, SAV, DALLY	2266	15	7937	2.56861	0.999544	0.020147	4.26421
Annotation Cluster 35	Enrichment Score: 4.671396703454094
Category	Term	Count	%	PValue	Genes	List Total	Pop Hits	Pop Total	Fold Enrichment	Bonferroni	Benjamini	FDR
GOTERM_BP_FAT	GO:0010605~negative regulation of macromolecule metabolic process	143	4.84746	2.3856e-10	CG8677, SRP14, SHN, OVO, PNR, MIP40, SIN3A, SU(VAR)2-HP2, PHOL, NIPP1, ORC5, MRPL39, ORC1, ORC2, E(Z), PH-D, MRG15, FMR1, CROL, SQD, SPN-E, HRB98DE, RPD3, NC2BETA, DSX, EDL, PH-P, SU(HW), SQU, SXL, DUP, SBB, LOLAL, N, RM62, MBD-LIKE, E(Y)3, TIS11, EMC, SU(H), EGG, SPN27A, SUUR, SPN4, CUP, NELF-E, SMG6, SMG5, PAIP2, SCE, LOQS, NELF-A, SMG1, DSP1, NELF-B, CTBP, GW, ODD, SCM, RCA1, GT, HDAC3, MIP130…	2266	317	7937	1.58006	7.6387e-07	8.39418e-09	4.32687e-07
GOTERM_BP_FAT	GO:0010629~negative regulation of gene expression	117	3.9661	4.92231e-09	CG8677, SHN, OVO, PNR, MIP40, SIN3A, SU(VAR)2-HP2, PHOL, ORC5, MRPL39, ORC1, ORC2, E(Z), PH-D, MRG15, FMR1, CROL, SPN-E, RPD3, NC2BETA, DSX, EDL, PH-P, SU(HW), SQU, SBB, LOLAL, N, RM62, MBD-LIKE, E(Y)3, TIS11, EMC, SU(H), EGG, NELF-E, SMG6, SMG5, SCE, LOQS, NELF-A, SMG1, DSP1, NELF-B, CTBP, GW, ODD, SCM, HDAC3, GT, R2D2, MIP130, DCP1, DCP2, LAM, RBF2, LIN-52, SIR2, PHO, MES-4, PC, E2F2, ESG, CTCF…	2266	256	7937	1.60082	1.57611e-05	1.45937e-07	8.92779e-06
GOTERM_BP_FAT	GO:0045934~negative regulation of nucleobase, nucleoside, nucleotide and nucleic acid metabolic process	97	3.28814	1.89132e-06	CG8677, SHN, OVO, PNR, MIP40, SIN3A, ORC5, ORC1, ORC2, E(Z), PH-D, MRG15, CROL, SQD, SPN-E, HRB98DE, RPD3, NC2BETA, DSX, EDL, PH-P, SU(HW), SXL, DUP, SBB, LOLAL, N, MBD-LIKE, E(Y)3, EMC, SU(H), EGG, SUUR, NELF-E, SCE, NELF-A, DSP1, NELF-B, CTBP, ODD, SCM, HDAC3, GT, MIP130, LAM, RBF2, LIN-52, SIR2, PHO, SNRNP70K, PC, E2F2, ESG, CTCF, DMAP1, ESC, GEMININ, L(3)MBT, NC2ALPHA, TEFU, PARG, MIP120, REP…	2266	223	7937	1.52357	0.00603772	3.6263e-05	0.00343031
GOTERM_BP_FAT	GO:0051172~negative regulation of nitrogen compound metabolic process	97	3.28814	1.89132e-06	CG8677, SHN, OVO, PNR, MIP40, SIN3A, ORC5, ORC1, ORC2, E(Z), PH-D, MRG15, CROL, SQD, SPN-E, HRB98DE, RPD3, NC2BETA, DSX, EDL, PH-P, SU(HW), SXL, DUP, SBB, LOLAL, N, MBD-LIKE, E(Y)3, EMC, SU(H), EGG, SUUR, NELF-E, SCE, NELF-A, DSP1, NELF-B, CTBP, ODD, SCM, HDAC3, GT, MIP130, LAM, RBF2, LIN-52, SIR2, PHO, SNRNP70K, PC, E2F2, ESG, CTCF, DMAP1, ESC, GEMININ, L(3)MBT, NC2ALPHA, TEFU, PARG, MIP120, REP…	2266	223	7937	1.52357	0.00603772	3.6263e-05	0.00343031
GOTERM_BP_FAT	GO:0051253~negative regulation of RNA metabolic process	85	2.88136	4.91758e-06	CG8677, E2F2, SHN, ESG, OVO, ESC, PNR, MIP40, L(3)MBT, NC2ALPHA, SIN3A, TEFU, ORC5, PARG, MIP120, ORC1, ORC2, E(Z), PH-D, MRG15, REPT, SQD, SPN-E, HRB98DE, RPD3, NC2BETA, DSX, GRO, PSI, PSC, HLHM3, PH-P, SU(HW), SMR, RBF, SXL, SBB, SPT5, ECR, SPT4, LOLAL, N, DCR-2, MBD-LIKE, DPN, E(Y)3, EMC, HLHMBETA, SU(H), EGG, CORTO, SU(VAR)3-9, TH1, HPO, NELF-E, SU(Z)12, SOB, SCE, NELF-A, SIRT4, GCL, DRM, SU(…	2266	193	7937	1.54262	0.0156228	8.51106e-05	0.00891884
GOTERM_BP_FAT	GO:0010558~negative regulation of macromolecule biosynthetic process	103	3.49153	6.967e-06	CG8677, SRP14, SHN, OVO, PNR, MIP40, SIN3A, ORC5, ORC1, ORC2, E(Z), PH-D, MRG15, FMR1, CROL, SQD, SPN-E, RPD3, NC2BETA, DSX, EDL, PH-P, SU(HW), SXL, DUP, SBB, LOLAL, N, MBD-LIKE, E(Y)3, EMC, SU(H), EGG, SUUR, CUP, NELF-E, PAIP2, SCE, NELF-A, DSP1, NELF-B, CTBP, ODD, SCM, HDAC3, GT, MIP130, LAM, RBF2, LIN-52, SIR2, PHO, EXBA, PC, E2F2, ESG, CTCF, ESC, DMAP1, GEMININ, L(3)MBT, NC2ALPHA, TEFU, PARG,…	2266	246	7937	1.46656	0.0220614	0.000114396	0.0126356
GOTERM_BP_FAT	GO:0031327~negative regulation of cellular biosynthetic process	104	3.52542	7.11587e-06	CG8677, SRP14, SHN, OVO, PNR, MIP40, SIN3A, ORC5, ORC1, ORC2, E(Z), PH-D, MRG15, FMR1, CROL, SQD, SPN-E, RPD3, NC2BETA, DSX, EDL, PH-P, SU(HW), SXL, DUP, E, SBB, LOLAL, N, MBD-LIKE, E(Y)3, EMC, SU(H), EGG, SUUR, CUP, NELF-E, PAIP2, SCE, NELF-A, DSP1, NELF-B, CTBP, ODD, SCM, HDAC3, GT, MIP130, LAM, RBF2, LIN-52, SIR2, PHO, EXBA, PC, E2F2, ESG, CTCF, ESC, DMAP1, GEMININ, L(3)MBT, NC2ALPHA, TEFU, PA…	2266	249	7937	1.46295	0.0225275	0.000116244	0.0129056
GOTERM_BP_FAT	GO:0009890~negative regulation of biosynthetic process	104	3.52542	7.11587e-06	CG8677, SRP14, SHN, OVO, PNR, MIP40, SIN3A, ORC5, ORC1, ORC2, E(Z), PH-D, MRG15, FMR1, CROL, SQD, SPN-E, RPD3, NC2BETA, DSX, EDL, PH-P, SU(HW), SXL, DUP, E, SBB, LOLAL, N, MBD-LIKE, E(Y)3, EMC, SU(H), EGG, SUUR, CUP, NELF-E, PAIP2, SCE, NELF-A, DSP1, NELF-B, CTBP, ODD, SCM, HDAC3, GT, MIP130, LAM, RBF2, LIN-52, SIR2, PHO, EXBA, PC, E2F2, ESG, CTCF, ESC, DMAP1, GEMININ, L(3)MBT, NC2ALPHA, TEFU, PA…	2266	249	7937	1.46295	0.0225275	0.000116244	0.0129056
GOTERM_BP_FAT	GO:0000122~negative regulation of transcription from RNA polymerase II promoter	35	1.18644	7.25965e-06	E2F2, SBB, SHN, SPT5, SPT4, ESG, OVO, N, MIP40, L(3)MBT, NC2ALPHA, DPN, EMC, HLHMBETA, MIP120, HPO, TH1, NELF-E, SOB, NELF-A, DRM, NELF-B, CTBP, ODD, NC2BETA, CI, GRO, DSX, GT, MIP130, HLHM3, LIN-52, RBF2, CYC, RBF	2266	61	7937	2.00972	0.0229774	0.00011799	0.0131663
GOTERM_BP_FAT	GO:0016481~negative regulation of transcription	89	3.01695	9.25363e-06	CG8677, E2F2, SHN, ESG, OVO, CTCF, DMAP1, ESC, PNR, MIP40, L(3)MBT, NC2ALPHA, SIN3A, TEFU, ORC5, PARG, MIP120, ORC1, ORC2, E(Z), PH-D, MRG15, REPT, CROL, SPN-E, RPD3, NC2BETA, DSX, GRO, EDL, PSC, HLHM3, PH-P, SU(HW), SMR, RBF, CREG, SBB, SPT5, ECR, SPT4, LOLAL, N, CIC, DCR-2, MBD-LIKE, DPN, E(Y)3, CHM, EMC, HLHMBETA, SU(H), EGG, CORTO, SU(VAR)3-9, TH1, HPO, NELF-E, SU(Z)12, SOB, SCE, NELF-A, SIRT…	2266	207	7937	1.50597	0.0291956	0.000141087	0.0167823
GOTERM_BP_FAT	GO:0045892~negative regulation of transcription, DNA-dependent	80	2.71186	3.42393e-05	CG8677, E2F2, SHN, ESG, OVO, ESC, PNR, MIP40, L(3)MBT, NC2ALPHA, SIN3A, TEFU, ORC5, PARG, MIP120, ORC1, ORC2, E(Z), PH-D, MRG15, REPT, SPN-E, RPD3, NC2BETA, DSX, GRO, PSC, HLHM3, PH-P, SU(HW), SMR, RBF, SBB, SPT5, ECR, SPT4, LOLAL, N, DCR-2, MBD-LIKE, DPN, E(Y)3, EMC, HLHMBETA, SU(H), EGG, CORTO, SU(VAR)3-9, TH1, HPO, NELF-E, SU(Z)12, SOB, SCE, NELF-A, SIRT4, GCL, DRM, SU(VAR)205, SIRT7, NELF-B, …	2266	187	7937	1.49846	0.10384	0.000454818	0.0620829
GOTERM_BP_FAT	GO:0016458~gene silencing	62	2.10169	0.0022102	PCM, ESC, SAS10, CG7843, TEFU, SU(VAR)2-HP2, PHOL, ORC5, PARG, MRPL39, ORC1, ORC2, E(Z), PH-D, MRG15, REPT, FMR1, SPN-E, RPD3, DOM, PSC, PH-P, SQU, PSQ, DCR-1, HSC70-4, PASHA, LOLAL, HSC70-3, DCR-2, RM62, DROSHA, MRPL11, E(Y)3, CHM, TIS11, CORTO, SU(VAR)3-9, SMG6, SU(VAR)3-3, SMG5, SU(Z)12, SCE, LOQS, SIRT4, SMG1, SU(VAR)205, SIRT7, GW, SIRT2, SCM, HDAC3, R2D2, DCP1, DCP2, GPP, LAM, SFMBT, SIR2, …	2266	155	7937	1.40106	0.999162	0.0187653	3.93371
GOTERM_BP_FAT	GO:0040029~regulation of gene expression, epigenetic	64	2.16949	0.00803409	TARA, PCM, ESC, MOF, CG7843, TEFU, SUV4-20, MT2, ORC5, PARG, JIL-1, ORC1, ORC2, E(Z), PH-D, MRG15, REPT, SPN-E, RPD3, PSC, PH-P, MSL-3, MSL-1, SXL, MSL-2, DCR-1, HSC70-4, PASHA, LOLAL, TNA, HSC70-3, DCR-2, RM62, DROSHA, DPN, TIS11, EGG, CORTO, SC, SU(VAR)3-9, SCF, SMG6, SMG5, SU(Z)12, SCE, LOQS, MLE, SIRT4, SMG1, SU(VAR)205, SIRT7, GW, SIRT2, HDAC3, R2D2, DCP1, DCP2, GPP, LAM, SFMBT, SIR2, PHO, R…	2266	169	7937	1.32645	1	0.0593708	13.6107
GOTERM_BP_FAT	GO:0045814~negative regulation of gene expression, epigenetic	31	1.05085	0.534179	LOLAL, ESC, DCR-2, TEFU, ORC5, PARG, ORC1, CORTO, ORC2, E(Z), PH-D, SU(VAR)3-9, MRG15, REPT, SU(Z)12, SCE, SIRT4, SPN-E, SIRT7, SU(VAR)205, RPD3, SIRT2, HDAC3, PSC, LAM, GPP, PH-P, SFMBT, SIR2, PHO, PC	2266	105	7937	1.03412	1	0.971727	99.9999
[truncated: 2,205 more rows]

## Sheet: No change 3
Annotation Cluster 1	Enrichment Score: 6.916252071387498
Category	Term	Count	%	PValue	Genes	List Total	Pop Hits	Pop Total	Fold Enrichment	Bonferroni	Benjamini	FDR
[truncated: 613 more rows]
