# Supplementary material for: Analysis of the Transcriptomes Downstream of Eyeless and the Hedgehog, Decapentaplegic and Notch Signaling Pathways in Drosophila melanogaster
Source: PLoS One. 2012 Aug 31;7(8):e44583. doi: 10.1371/journal.pone.0044583 (PMC3432130; doi:10.1371/journal.pone.0044583)
Supplement: Table S6 — List of a subset of genes in DAVID clusters associated with neuronal differentiation. (XLSX) [file pone.0044583.s011.xlsx]

## Sheet: Sheet1
	eye control	ap>ey	ap>ey,hh	ap>ey,dpp	ap>ey,N	molecular information	role(s) in neuronal differentiation	function in eye devo
ANK2	X	X	X	X	X	scaffolding protein	axon extension; NMJ development	expression
APPL	X	X	X	X	X	beta-amyloid protein precursor-like	neuron proj morphogenesis; synapse organization	expression; overexpression phenotype
CDK5ALPHA	X			X		cyclin dependent kinase	axonogenesis	overexpression phenotype
CHP	X					LRR protein	rhabdomere development	yes - rhabdomere development
COMM	X					transmembrane protein	axon guidance	no
EXEX	X					transcription factor	axon target recognition	no
FUTSCH	X			X		microtubule associated protein	axonogenesis; dendrite morph; NMJ synaptic growth	no
GOGO	X			X		cell surface protein	photoreceptor and retinal ganglion cell axon guidance	yes - photoreceptor axon guidance
JEB	X					LDL receptor repeat-containing	axon guidance	yes - photoreceptor axon guidance
LIM3	X			X		transcription factor	motor axon guidance	expression
MID	X					transcription factor	axonogenesis/axon guidance	no
NERFIN-1	X	X	X	X		transcription factor	axon guidance; dendrite morphogenesis	expression
NRG	X					immunoglobulin family	axonogenesis; dendrite morph; synapse organization	RNAi
RETN	X			X		transcription factor	axon guidance	yes - photoreceptor axon guidance
ROBO3	X					immunoglobulin family	axon guidance	yes - photoreceptor axon guidance
SCRT	X	X	X	X		transcription factor	dendrite morphogenesis	yes
SOXN	X					transcription factor	axon guidance	overexpression phenotype
