# Supplementary material for: Analysis of the Transcriptomes Downstream of Eyeless and the Hedgehog, Decapentaplegic and Notch Signaling Pathways in Drosophila melanogaster
Source: PLoS One. 2012 Aug 31;7(8):e44583. doi: 10.1371/journal.pone.0044583 (PMC3432130; doi:10.1371/journal.pone.0044583)
Supplement: Table S7 — List of a subset of genes in DAVID clusters associated with photoreceptor/neuronal function. (XLSX) [file pone.0044583.s012.xlsx]

## Sheet: Sheet1
	gene	molecular information	function in eye?	eye control	ap>ey	ap>ey,hh	ap>ey,dpp	ap>ey,N
	ARR1	arrestin	phototransduction	X					phototransduction
	GGAMMA30A	G protein g subunit	phototransduction	X					synaptic transmission
	INAC	PKC	phototransduction	X	X	X	X
	NINAB	rhodopsin synthesis	phototransduction	X			X
	RDGC	Ser/Thr phosphatase	phototransduction	X
	RH6	rhodopsin	phototransduction	X
	ACE	acetylcholinesterase	phototaxis	X			X
	BRP	CAST/ERC family	expression	X
	CG4476	neurotransmitter transporter	phototaxis	X
	CPO	mRNA binding protein	phototaxis	X			X
	CPX	complexin	no	X				X
	N-SYB	synaptobrevin (SNAP receptor)	yes	X			X
	PLE	dopamine biosynthesis	phototaxis	X
	RAB3	small GTPase	no	X
	UNC-104	kinesin	yes	X
