# Supplementary material for: Analysis of the Transcriptomes Downstream of Eyeless and the Hedgehog, Decapentaplegic and Notch Signaling Pathways in Drosophila melanogaster
Source: PLoS One. 2012 Aug 31;7(8):e44583. doi: 10.1371/journal.pone.0044583 (PMC3432130; doi:10.1371/journal.pone.0044583)
Supplement: Table S8 — List of the eye/photoreceptor specification factors found in the “eye/photoreceptor development” DAVID clusters in different libraries. (XLSX) [file pone.0044583.s013.xlsx]

## Sheet: Sheet1
	eye control	ap>ey	ap>ey,hh	ap>ey,dpp	ap>ey,N
	ATO	X		X
	DAC	X		X
	DAN	X	X	X	X
	DANR	X	X	X	X
	EYA	X		X
	LZ	X	X	X
	OC			X	X
	OPTIX	X		X
	PROS
	SCRT	X	X	X
	SO			X
	TOY
